# Supplementary material for: Composition and distribution of fish environmental DNA in an Adirondack watershed
Source: PeerJ. 2021 Feb 26;9:e10539. doi: 10.7717/peerj.10539 (PMC7919543; doi:10.7717/peerj.10539)
Supplement: Supplemental Information 18 — Sample names, NCBI accessions, coordinates, collection dates, and other sample metadata. [file peerj-09-10539-s018.xlsx]

## Sheet: Sheet1
		Supplemental File S1. Sampling site metadata.
Sample Name	Site identifier	Date	Local time	Lat	Long	Section	Site Description	Site Flow (m/s)	DNA concentration (ng/uL)	Technical replicate performed?
ST-D001	3	2015-08-04	16:20:00	44.9748	-74.6598	Below dam	Downstream of Hogansburg Dam, after bend in river	NA	2.85	y
ST-D002	3	2015-08-04	16:45:00	44.9759	-74.6612	Below dam	Boat Launch off Mill St. Rd, Downstream of Dam	NA	5.83
ST-D003	3	2015-08-04	17:00:00	44.9768	-74.6629	Below dam	Sandbar below island, Downstream of Dam	NA	6.49	y
ST-D004	4	2015-08-07	08:40:00	44.9723	-74.6664	Lower Reach (Above dam)	Above Dam, upstream about 500m from Dam	NA	4.51
ST-D005	4	2015-08-07	09:10:00	44.9715	-74.668	Lower Reach (Above dam)	Above Dam, between clearing on East bank and Willows on West bank	NA	5.65
ST-D006	4	2015-08-07	09:25:00	44.97	-74.6689	Lower Reach (Above dam)	Above Dam, between small clearing and flat rock on East bank and patch of small dead trees on West bank 100m up from boat launch	NA	7.66
ST-D007	10	2015-08-17	14:00:00	44.8773	-74.7751	Middle Reach	DEC Boat Launch on Brasher Center Rd	0.02	9.26
ST-D008	11	2015-08-17	14:30:00	44.819	-74.7841	Middle Reach	West Bank Downstream of Power Station on Brasher Center Rd	0.07	9.25
ST-D009	12	2015-08-17	15:29:00	44.773	-74.7904	Middle Reach	Shallow rocky flat next to US-11 Bridge, at Braid in River	0.77	3.11
ST-D010	13	2015-08-17	16:33:00	44.7415	-74.7665	Middle Reach	Access from private property on Haack Rd; 1.3 km upstream of Buckton Rd bridge and 10m downstream of inlet on South Bank	0.75	3.39
ST-D011	14	2015-08-17	17:19:00	44.7059	-74.7152	Middle Reach	County Rd 49 Bridge	0.37	3.61
ST-D012	15	2015-08-17	17:46:00	44.688	-74.6118	Middle Reach	Mill Rd Bridge, DEC fishing access	NA	5.66
ST-D013	1	2015-08-18	10:01:00	44.9969	-74.6462	Below dam	Just before Canadian border, across from large Warehouse	0.02	9.32
ST-D014	2	2015-08-18	10:39:00	44.9851	-74.6546	Below dam	At riverbend across from private boat launch on end of White Rd	0.02	8.17
ST-D015	3	2015-08-18	11:04:00	44.9763	-74.6616	Below dam	Near end of island downstream of Hogansburg Dam	0.11	5.45	y
ST-D016	4	2015-08-18	12:13:00	44.9705	-74.6688	Lower Reach (Above dam)	Between gravel launch upstream of Hogansburg Dam and rocks upstream of cove	0.16	7.21
ST-D017	5	2015-08-18	12:38:00	44.962	-74.6699	Lower Reach (Above dam)	Around first bend upstream of Hogansburg Dam along large stretch of Willows	0.19	5.91
ST-D018	8	2015-08-18	14:39:00	44.9331	-74.708	Lower Reach (Above dam)	Wide part of river across from end of Frogtown Rd	0.16	11.6
ST-D019	7	2015-08-18	15:37:00	44.9449	-74.6994	Lower Reach (Above dam)	Between two islands near metal dock	0.18	8.95
ST-D020	6	2015-08-18	15:59:00	44.9597	-74.6846	Lower Reach (Above dam)	Across from houses on water at bend in river	0.19	7.67
ST-D021	9	2015-08-18	17:20:00	44.9247	-74.7224	Lower Reach (Above dam)	Between train and NY-37C bridges	0.68	9.06
ST-D022	16	2015-08-19	10:00:00	44.6751	-74.4273	Headwaters	Everton Rd by DEC parking lot near culvert off CR-14	0.13	20.3	y
ST-D023	17	2015-08-19	10:58:00	44.6339	-74.4386	Headwaters	Culvert next Santa Clara tract entrance off state highway 72	0.56	12
ST-D024	18	2015-08-19	11:33:00	44.6185	-74.2865	Headwaters	Cold Brook Rd Shallow sandy spring-fed stream next to hunting cabin	0.2	0.366
ST-D025	19	2015-08-19	12:16:00	44.5759	-74.2735	Headwaters	Bridge at Meacham campground over bouldery stream (Winnebago Brook)	0.21	0.449
ST-D026	20	2015-08-19	13:19:00	44.481	-74.2801	Headwaters	Forested stream in Hays Brook DEC pull off	0.14	4.4
ST-D027	22	2015-08-19	13:45:00	44.4313	-74.2995	Headwaters	Second stream crossing on Park road off Keese Mills Rd	0.44	6.32
ST-D028	21	2015-08-19	14:07:00	44.4333	-74.3433	Headwaters	Pull off area on Keese Mills Rd, shallow sandy spring above culvert	0.07	1.4
ST-D029	2	2015-09-16	14:32:00	44.9862	-74.6546	Below dam	At riverbend across from private boat launch on end of White Rd	0.04	13
ST-D030	3	2015-09-15	10:10:00	44.9759	-74.6621	Below dam	Near end of island downstream of Hogansburg Dam	0.22	11.2
ST-D031	9	2015-09-15	11:22:00	44.9252	-74.7223	Lower Reach (Above dam)	Between train and NY-37C bridges	0.61	10
ST-D032	10	2015-09-15	12:14:00	44.8775	-74.775	Middle Reach	DEC Boat Launch on Brasher Center Rd	0.01	14.3	y
ST-D033	11	2015-09-15	12:30:00	44.8191	-74.7841	Middle Reach	West Bank Downstream of Power Station on Brasher Center Rd	0.05	8.74
ST-D034	12	2015-09-15	13:20:00	44.7731	-74.7906	Middle Reach	Shallow rocky flat next to US-11 Bridge, at Braid in River	0.71	6.34
ST-D035	13	2015-09-15	13:59:00	44.7416	-74.7666	Middle Reach	Access from private property on Haack Rd; 1.3 km upstream of Buckton Rd bridge and 10m downstream of inlet on South Bank	0.81	6.28
ST-D036	14	2015-09-15	14:49:00	44.7058	-74.7153	Middle Reach	County Rd 49 Bridge	0.35	4.6	y
ST-D037	4	2015-09-16	11:38:00	44.9708	-74.6694	Lower Reach (Above dam)	Between gravel launch upstream of Hogansburg Dam and rocks upstream of cove	0.02	13.3	y
ST-D038	5	2015-09-16	12:33:00	44.962	-74.6703	Lower Reach (Above dam)	Around first bend upstream of Hogansburg Dam along large stretch of Willows	0.24	11
ST-D039	7	2015-09-16	13:47:00	44.9442	-74.6994	Lower Reach (Above dam)	Between two islands near metal dock	0.29	11.2
ST-D040	8	2015-09-16	14:24:00	44.9336	-74.708	Lower Reach (Above dam)	Across from houses on water at bend in river	0.15	9.17	y
ST-D041	15	2015-09-17	09:11:00	44.6881	-74.612	Middle Reach	Mill Rd Bridge, DEC fishing access	0.41	5.51
ST-D042	17	2015-09-17	09:43:00	44.634	-74.4386	Headwaters	Culvert next Santa Clara tract entrance off state highway 72	0.31	3.3
ST-D043	16	2015-09-17	10:15:00	44.6751	-74.4273	Headwaters	Everton Rd by DEC parking lot near culvert off CR-14	0.01	16.3
ST-D044	18	2015-09-17	11:10:00	44.6185	-74.2866	Headwaters	Cold Brook Rd Shallow sandy spring-fed stream next to hunting cabin	0.2	1.17
ST-D045	19	2015-09-17	11:31:00	44.5759	-74.2733	Headwaters	Bridge at Meacham campground over bouldery stream (Winnebago Brook)	0.24	1.62
ST-D046	20	2015-09-17	12:32:00	44.4815	-74.2806	Headwaters	Forested stream in Hays Brook DEC pull off	0.18	1.08
ST-D047	22	2015-09-17	13:06:00	44.4313	-74.2995	Headwaters	Second stream crossing on Park road off Keese Mills Rd	0.28	9.28
ST-D048	21	2015-09-17	13:32:00	44.4332	-74.3432	Headwaters	Pull off area on Keese Mills Rd, shallow sandy spring above culvert	0.11	2.91	y
ST-D049	6	2015-09-18	08:00:00	44.9597	-74.6859	Lower Reach (Above dam)	Wide part of river across from end of Frogtown Rd	0.02	9.2
ST-D050	1	2015-09-18	08:56:00	44.9965	-74.6466	Below dam	Just before Canadian border, across from large Warehouse	0.08	7.41
ST-D051	1	2015-10-06	09:10:00	44.9974	-74.6466	Below dam	Just before Canadian border, across from large Warehouse	0.02	5.04
ST-D052	2	2015-10-06	09:22:00	44.9856	-74.6536	Below dam	At riverbend across from private boat launch on end of White Rd	0.01	6.84
ST-D053	3	2015-10-06	09:40:00	44.9764	-74.6618	Below dam	Near end of island downstream of Hogansburg Dam	0.03	7.51
ST-D054	4	2015-10-06	10:56:00	44.9707	-74.6692	Lower Reach (Above dam)	Between gravel launch upstream of Hogansburg Dam and rocks upstream of cove	0.08	6.93
ST-D055	5	2015-10-06	11:15:00	44.9622	-74.6694	Lower Reach (Above dam)	Around first bend upstream of Hogansburg Dam along large stretch of Willows	0.08	6.13
ST-D056	6	2015-10-06	11:59:00	44.9592	-74.6855	Lower Reach (Above dam)	Wide part of river across from end of Frogtown Rd	0.04	8.57	y
ST-D057	7	2015-10-06	12:31:00	44.9449	-74.6995	Lower Reach (Above dam)	Between two islands near metal dock	0.14	6.89
ST-D058	8	2015-10-06	13:08:00	44.9335	-74.7086	Lower Reach (Above dam)	Across from houses on water at bend in river	0.14	4.09
ST-D059	9	2015-10-06	15:38:00	44.925	-74.7226	Lower Reach (Above dam)	Between train and NY-37C bridges	0.08	5.42
ST-D060	10	2015-10-06	15:48:00	44.8775	-74.7751	Middle Reach	DEC Boat Launch on Brasher Center Rd	0.03	4.58
ST-D061	11	2015-10-06	16:22:00	44.8191	-74.7841	Middle Reach	West Bank Downstream of Power Station on Brasher Center Rd	0.09	3.7
ST-D062	15	2015-10-07	08:36:00	44.688	-74.6118	Middle Reach	Mill Rd Bridge, DEC fishing access	0.23	3.35
ST-D063	17	2015-10-07	09:53:00	44.6339	-74.4386	Headwaters	Culvert next Santa Clara tract entrance off state highway 72	0.07	2.66
ST-D064	16	2015-10-07	11:15:00	44.6752	-74.4274	Headwaters	Everton Rd by DEC parking lot near culvert off CR-14	0.02	2.26
ST-D065	18	2015-10-07	11:53:00	44.6185	-74.2863	Headwaters	Cold Brook Rd Shallow sandy spring-fed stream next to hunting cabin	0.19	0.324	y
ST-D066	19	2015-10-07	12:21:00	44.5759	-74.2734	Headwaters	Bridge at Meacham campground over bouldery stream (Winnebago Brook)	0.08	0.596
ST-D067	20	2015-10-07	13:27:00	44.481	-74.2801	Headwaters	Forested stream in Hays Brook DEC pull off	0.22	1.06
ST-D068	22	2015-10-07	14:34:00	44.4312	-74.2996	Headwaters	Second stream crossing on Park road off Keese Mills Rd	0.44	5.9
ST-D069	21	2015-10-07	14:51:00	44.4332	-74.3433	Headwaters	Pull off area on Keese Mills Rd, shallow sandy spring above culvert	0.06	1.48
ST-D070	12	2015-10-08	08:52:00	44.773	-74.7903	Middle Reach	Shallow rocky flat next to US-11 Bridge, at Braid in River	0.41	1.06	y
ST-D071	13	2015-10-08	09:33:00	44.7416	-74.7667	Middle Reach	Access from private property on Haack Rd; 1.3 km upstream of Buckton Rd bridge and 10m downstream of inlet on South Bank	0.58	1.36
ST-D072	14	2015-10-08	10:05:00	44.7058	-74.7153	Middle Reach	County Rd 49 Bridge	0.14	1.28
