# Supplementary material for: Composition and distribution of fish environmental DNA in an Adirondack watershed
Source: PeerJ. 2021 Feb 26;9:e10539. doi: 10.7717/peerj.10539 (PMC7919543; doi:10.7717/peerj.10539)
Supplement: Supplemental Information 22 — Each sheet of the spreadsheet contains samples selected for specific analyses, for example, duplicates, negative controls, and biological samples above threshold library sizes. Sample names correspond to those in File S1, but with the unique MiSeq sample ID appended as well. Technical duplicates are marked by the text “dup” in the sample name. Raw counts are provided, but were censored, transformed, or scaled as described in the text depending on the analysis. [file peerj-09-10539-s022.xlsx]

## Sheet: negative controls
Supplemental File S5. Raw counts attributed to taxa by sample group.
taxon	25C_S85	26C_S86	27C_S87	28C_S88	29C_S89	30C_S90	31C_S91	32C_S92	33C_S93	34C_S94	35C_S95	36C_S96
Culaea haplotype 1	0	0	0	0	0	0	0	0	0	0	0	0
Rhinichthys atratulus	0	0	0	30	0	0	0	0	0	0	0	0
Pimephales promelas	0	0	0	0	0	0	0	0	0	0	0	0
ACIPENSER	0	0	0	0	0	1	0	4	1	0	7	0
Catostomus commersonii	0	0	0	0	1	0	0	0	0	2	0	0
Carassius auratus	0	0	0	0	0	0	0	0	0	0	0	0
Micropterus salmoides	0	0	0	0	1	0	0	0	0	0	1	0
Culaea inconstans	0	0	0	0	0	0	0	0	0	0	0	0
Ambloplites rupestris	4	2	3	5	0	2	2	1	5	0	2	0
Esox masquinongy	0	0	0	0	0	0	0	0	0	0	0	0
Percina maculata	0	0	0	0	0	0	0	0	0	0	0	0
Ictalurus punctatus	0	0	0	0	0	0	0	0	0	0	4	0
Pomoxis nigromaculatus	0	0	0	0	0	0	0	0	0	0	0	0
Etheostoma olmstedi	0	0	0	0	0	0	0	0	0	0	0	0
Etheostoma exile	0	0	0	0	0	0	0	0	0	0	0	0
ICHTHYOMYZON	0	0	0	0	0	0	0	0	0	0	0	0
Campostoma anomalum	0	0	0	0	0	0	0	0	0	0	0	0
CYPRINID3	0	0	0	0	0	0	0	0	0	0	0	0
Cottus cognatus	0	0	0	3	0	0	0	0	0	0	30	0
Ictalurus haplotype 1	5	2	9	7	2	1	0	3	2	2	5	0
Percina caprodes	0	0	0	0	0	2	0	0	0	0	0	0
Etheostoma flabellare	1	2	6	5	0	1	1	1	0	0	0	0
Lepomis haplotype 1	0	0	0	0	0	0	0	0	0	0	0	0
Ameiurus melas	0	0	0	0	0	0	0	0	0	0	0	0
Hybopsis amblops	0	0	0	0	0	0	0	0	0	0	0	0
Lepomis haplotype 2	0	0	0	0	0	0	0	0	0	0	0	0
Cyprinella spiloptera	5	1	3	1	1	0	0	2	0	3	1	0
Notemigonus crysoleucas	0	0	1	0	0	0	0	0	0	0	0	0
Clinostomus elongatus	0	0	0	0	0	0	0	0	0	0	0	0
Perca flavescens	0	1	0	0	0	0	0	0	0	0	0	0
Percina macrocephala	0	0	1	1	0	0	0	1	0	0	2	0
Morone americana	0	0	0	0	0	0	0	0	0	0	0	0
Noturus flavus	0	0	0	0	0	0	0	0	0	0	0	0
Esox lucius	0	0	0	1	0	0	0	0	0	0	0	1
Exoglossum laurae	0	0	0	0	0	0	0	0	0	0	0	0
Percina copelandi	0	0	0	3	1	0	1	0	0	0	0	0
Rhinichthys cataractae	1	1	1	2	1	1	0	0	0	0	0	2
Ameiurus nebulosus	0	1	0	0	0	0	0	0	0	0	0	0
Micropterus dolomieu	3	0	15	3	0	2	0	2	2	1	0	0
Ameiurus catus	0	0	0	0	0	0	0	0	0	0	0	0
Etheostoma caeruleum	0	0	0	0	0	0	0	0	0	0	0	0
CYPRINID1	1	0	0	1	0	0	0	1	0	0	0	0
Lepomis megalotis	0	0	0	0	0	0	0	0	0	0	0	0
Sander canadensis	0	0	0	0	0	0	0	0	0	0	0	0
Etheostoma nigrum	1	1	0	4	0	0	3	0	1	1	0	1
Etheostoma haplotype 1	1	2	3	5	1	2	2	6	1	3	1	2
Exoglossum maxillingua	0	0	0	0	0	0	0	0	0	0	0	0
SALVELINUS	0	0	0	249	0	0	0	0	0	0	888	0
Salmo trutta	0	0	0	0	0	0	0	0	0	0	3	0
Salmo salar	0	0	0	0	0	0	0	0	0	0	745	0
Nocomis biguttatus	0	0	0	0	0	0	0	0	0	0	0	0
Oncorhynchus mykiss	0	0	0	0	0	0	0	0	0	0	0	0
Lepomis gibbosus	1	0	1	0	0	0	0	1	4	0	0	0
Ammocrypta pellucida	0	0	0	0	0	0	0	0	0	0	0	0
Cyprinus carpio	0	0	0	0	0	0	0	0	0	0	5	0
Lepomis auritus	0	0	0	0	0	0	0	0	0	0	0	0
CYPRINID2	18	2	3	9	1	1	0	2	0	0	1	1
Semotilus atromaculatus	17	5	4	63	2	0	1	6	0	2	4	2
Petromyzon marinus	0	0	0	0	0	0	0	0	0	0	0	0
Noturus gyrinus	0	0	0	2	0	0	0	0	0	0	0	0
Catostomus catostomus	0	0	0	0	0	0	0	0	0	0	0	0
Moxostoma anisurum	14	14	24	22	3	12	5	7	2	6	5	1
Umbra limi	0	0	0	0	0	0	0	0	0	1	0	0
Noturus insignis	0	0	0	0	0	0	0	0	0	0	0	0
Sander vitreus	0	0	0	6	0	1	0	1	0	0	1	1
Oncorhynchus tshawytscha	0	0	0	0	0	0	0	0	0	0	3	0

## Sheet: duplicates
	91	184	97923	123599	28678	134335	2050	2035	60570	88030	3831	1588	79456	96348	75648	73506	260	271	46804	82140	75	120	151	201
taxon	STD001_S1	STD001dup_S73	STD003_S3	STD003dup_S74	STD015_S15	STD015dup_S75	STD022_S22	STD022dup_S76	STD032_S32	STD032dup_S77	STD036_S36	STD036dup_S78	STD037_S37	STD037dup_S79	STD040_S40	STD040dup_S80	STD048_S48	STD048dup_S81	STD056_S56	STD056dup_S82	STD065_S65	STD065dup_S83	STD070_S70	STD070dup_S84
Culaea haplotype 1	0	0	2	0	0	0	12	415	0	0	179	27	0	0	0	0	1	0	0	0	0	0	0	0
Rhinichthys atratulus	0	0	0	0	0	0	0	0	0	0	9	106	0	1	0	0	20	18	0	0	0	0	0	0
Pimephales promelas	0	0	0	0	0	1	0	0	1	1	2	20	12	0	0	0	0	0	0	4	0	0	0	0
ACIPENSER	0	1	6	0	0	1059	0	3	0	0	0	0	0	0	0	0	0	1	2274	0	1	1	0	0
Catostomus commersonii	2	2	1	0	1	973	0	2	0	1	20	64	3	0	0	1	6	0	0	1	0	0	0	1
Carassius auratus	0	0	0	1	0	0	0	0	0	0	0	0	0	0	0	0	0	0	0	0	0	0	0	0
Micropterus salmoides	0	0	2	6	0	1	0	0	0	0	0	0	10	13	2	1	0	0	1	0	0	0	0	0
Culaea inconstans	0	0	0	0	0	0	0	0	0	0	0	0	0	1	0	0	0	0	0	0	0	0	0	0
Ambloplites rupestris	10	20	8303	5362	1468	6948	5	3	1421	5917	0	5	8	2	79	6111	0	2	1430	4765	0	2	1	1
Esox masquinongy	0	0	415	0	0	1	1	0	1038	0	0	0	0	0	0	0	0	0	0	0	0	0	0	0
Percina maculata	0	0	23	18	0	50	0	0	6	0	0	0	1	6	13	27	0	0	0	0	0	0	0	0
Ictalurus punctatus	3	34	17441	26693	1155	6485	0	0	0	4	0	2	7	3	1	11	0	0	1	13	0	3	0	0
Pomoxis nigromaculatus	0	0	0	0	0	0	0	0	0	0	0	0	0	0	0	0	0	0	0	0	0	0	0	0
Etheostoma olmstedi	1	1	9087	2033	391	2	1	0	0	0	0	0	1	1	3	7	0	0	3	4	0	0	0	0
Etheostoma exile	0	0	0	0	0	0	0	0	0	0	0	0	0	0	0	0	0	0	0	0	0	0	0	0
ICHTHYOMYZON	0	0	0	0	0	0	0	0	0	1	0	0	1	0	0	0	0	0	0	0	0	0	0	0
Campostoma anomalum	0	0	0	0	0	0	0	0	0	0	0	0	0	0	1	0	0	0	0	0	0	0	0	0
CYPRINID3	0	0	11	18	6	21	0	0	92	156	2	0	88	10	15	27	0	0	27	43	0	0	0	0
Cottus cognatus	0	0	0	0	0	0	0	0	0	0	0	0	0	0	0	0	0	0	0	0	0	0	0	0
Ictalurus haplotype 1	2	6	826	1322	106	1830	2	0	4	7951	525	80	3347	11783	4879	1664	0	0	2134	11332	1	2	34	28
Percina caprodes	0	0	2329	1909	466	4113	1	0	1268	1	0	4	0	2814	2040	1387	0	0	2	0	0	1	3	1
Etheostoma flabellare	3	1	4710	4613	1350	11929	3	2	13	3	672	540	4227	5909	11928	8751	0	0	3	6546	0	3	17	26
Lepomis haplotype 1	0	0	0	19	0	0	0	0	0	1	0	0	121	18	0	0	0	0	10	0	0	0	0	0
Ameiurus melas	0	0	681	0	3	5	0	0	0	0	0	0	13	0	0	0	0	0	0	0	0	0	0	0
Hybopsis amblops	0	0	0	0	0	0	0	0	1	1	0	0	0	0	0	0	0	0	1	1	0	0	0	0
Lepomis haplotype 2	0	0	0	164	0	0	0	0	0	0	0	0	253	214	0	0	0	0	58	0	0	0	0	0
Cyprinella spiloptera	0	3	1896	1411	1621	6336	3	2	5477	3638	0	7	4125	2	4	5	0	1	3814	5787	1	5	0	0
Notemigonus crysoleucas	0	1	0	2	0	1	144	0	0	1	1	0	3	0	0	0	1	0	0	1	0	0	0	1
Clinostomus elongatus	0	0	0	0	0	0	0	0	0	0	0	0	1	0	0	0	0	0	0	0	0	0	0	1
Perca flavescens	0	0	0	2	0	0	0	0	0	0	0	0	1	0	1	0	2	0	0	0	0	0	0	0
Percina macrocephala	1	0	2358	1773	495	4123	3	1	1289	2	0	2	0	2980	2160	1520	0	1	1	2	0	3	2	3
Morone americana	0	0	0	0	0	0	0	0	0	0	0	0	0	0	0	0	0	0	0	0	0	0	0	0
Noturus flavus	0	0	0	0	0	1	0	0	0	0	0	0	0	0	0	0	0	0	0	0	0	0	0	0
Esox lucius	0	1	1	587	0	55	1	0	1	755	0	0	0	0	0	0	0	0	0	0	0	0	0	0
Exoglossum laurae	0	0	0	0	0	0	0	0	0	0	0	0	1	0	0	1	0	0	0	0	0	0	0	0
Percina copelandi	9	3	2819	2814	2	4536	1	1	5	0	0	0	0	16	12	4367	0	0	3	2	0	2	0	0
Rhinichthys cataractae	1	1	0	2695	1	3	0	0	1149	4	821	218	9277	0	1797	0	0	2	0	4873	0	1	26	43
Ameiurus nebulosus	0	1	1	1	142	835	0	0	0	0	0	14	2805	0	0	0	0	0	2	1	0	0	0	0
Micropterus dolomieu	9	21	8945	7980	170	4847	9	2	1407	3761	6	9	7959	15273	11748	4369	2	0	1450	9	9	6	0	9
Ameiurus catus	0	0	95	104	4	19	0	0	0	0	0	0	10	0	0	0	0	0	0	0	0	0	0	0
Etheostoma caeruleum	0	0	0	1	0	0	0	0	0	0	1	0	0	0	0	0	0	0	0	0	0	0	0	0
CYPRINID1	0	0	0	1	0	1	366	179	3	1	6	18	21	0	4	18	1	0	2	7	0	0	1	0
Lepomis megalotis	0	0	0	0	0	0	0	0	0	0	0	0	1	0	0	0	0	0	0	0	0	0	0	0
Sander canadensis	0	0	6	3	0	1	0	0	0	0	0	0	0	3	5	6	0	0	0	0	0	0	0	0
Etheostoma nigrum	0	2	131	1843	8	43	0	0	133	153	10	6	24	126	3229	2923	0	0	3872	4316	0	0	0	1
Etheostoma haplotype 1	2	3	27	2699	0	2195	2	1	4556	3512	3	10	2	2939	20	2695	1	0	21	15	2	2	5	10
Exoglossum maxillingua	0	0	0	0	0	0	0	0	0	0	321	40	0	0	0	2080	0	0	2	0	0	0	4	5
SALVELINUS	2	14	0	0	1	0	322	172	0	0	6	6	0	0	0	0	200	200	0	0	27	35	0	0
Salmo trutta	0	0	0	0	0	0	0	0	0	0	0	0	0	0	0	0	0	0	0	0	0	0	0	0
Salmo salar	0	0	0	0	0	0	0	0	0	0	0	0	0	0	0	0	0	0	0	0	0	0	0	0
Nocomis biguttatus	0	0	0	0	0	0	0	0	1	0	0	0	0	0	0	1	0	0	0	0	0	0	0	0
Oncorhynchus mykiss	0	0	0	0	0	0	0	0	0	0	28	0	0	0	0	0	0	0	0	0	0	0	0	0
Lepomis gibbosus	0	2	0	3698	0	1	0	1	0	2	0	2	8211	5946	0	3	1	0	1888	4	1	0	0	1
Ammocrypta pellucida	0	0	0	0	0	0	0	0	0	0	0	0	0	0	0	0	0	0	0	0	0	0	0	0
Cyprinus carpio	0	1	2671	4139	0	0	0	0	0	0	0	1	0	0	0	0	0	0	0	2	0	0	0	0
Lepomis auritus	0	0	0	31	0	0	0	0	0	0	0	0	37	32	0	0	0	0	10	0	0	0	0	0
CYPRINID2	10	9	4070	7010	5487	14944	7	8	16337	28579	6	10	9592	4130	1892	8100	1	2	7555	5547	1	8	0	2
Semotilus atromaculatus	6	13	7419	2579	2043	7102	1134	1229	14821	21511	1198	314	10753	3823	8064	4669	22	40	7637	10643	8	6	47	45
Petromyzon marinus	0	2	0	0	0	0	0	0	0	0	0	0	0	0	0	0	0	0	0	0	0	0	0	0
Noturus gyrinus	0	0	0	0	0	0	0	0	0	0	0	0	0	0	0	0	0	0	0	1896	0	0	0	0
Catostomus catostomus	0	0	7	4	1	8	0	0	1	3	0	0	4	7	6	2	0	0	0	6	0	0	0	0
Moxostoma anisurum	26	39	23626	35679	8647	34417	32	14	11545	12066	15	72	18536	40291	27742	18564	2	4	14601	26307	24	28	4	10
Umbra limi	0	0	0	0	0	0	0	0	0	0	0	0	0	0	0	0	0	0	0	0	0	0	0	0
Noturus insignis	0	0	0	1	0	0	0	0	0	0	0	0	0	0	0	0	0	0	0	0	0	0	0	0
Sander vitreus	4	3	14	6384	5110	21449	1	0	1	5	0	11	1	5	3	6196	0	0	2	13	0	12	7	13
Oncorhynchus tshawytscha	0	0	0	0	0	0	0	0	0	0	0	0	0	0	0	0	0	0	0	0	0	0	0	0

## Sheet: all biological samples
	184	91	101937	123599	97923	265	20657	51322	138	164	96	129	163	69	140	91476	134335	28678	42351	83170	99337	90888	102647	89092	2035	2050	747	181	27	103	151	6	11715	56655	77489	88030	60570	74521	392	184	1588	3831	96348	79456	61318	74072	73506	75648	121
taxon	STD001dup_S73	STD001_S1	STD002_S2	STD003dup_S74	STD003_S3	STD004_S4	STD005_S5	STD006_S6	STD007_S7	STD008_S8	STD009_S9	STD010_S10	STD011_S11	STD012_S12	STD013_S13	STD014_S14	STD015dup_S75	STD015_S15	STD016_S16	STD017_S17	STD018_S18	STD019_S19	STD020_S20	STD021_S21	STD022dup_S76	STD022_S22	STD023_S23	STD024_S24	STD025_S25	STD026_S26	STD027_S27	STD028_S28	STD029_S29	STD030_S30	STD031_S31	STD032dup_S77	STD032_S32	STD033_S33	STD034_S34	STD035_S35	STD036dup_S78	STD036_S36	STD037dup_S79	STD037_S37	STD038_S38	STD039_S39	STD040dup_S80	STD040_S40	STD041_S41
Culaea haplotype 1	0	0	0	0	2	0	0	0	1	0	0	0	0	0	0	0	0	0	0	0	0	0	0	0	415	12	0	0	0	5	1	0	0	0	2626	0	0	1	0	0	27	179	0	0	0	3173	0	0	1
Rhinichthys atratulus	0	0	0	0	0	0	0	0	0	0	0	0	0	0	0	0	0	0	0	0	1	0	0	0	0	0	120	0	2	0	0	0	0	0	0	0	0	0	1	0	106	9	1	0	0	0	0	0	0
Pimephales promelas	0	0	0	0	0	0	0	0	0	0	1	0	0	0	0	0	1	0	0	0	0	0	0	5	0	0	0	0	0	0	0	0	0	0	11	1	1	2	0	0	20	2	0	12	0	0	0	0	0
ACIPENSER	1	0	0	0	6	0	0	1	0	0	0	0	2	1	0	0	1059	0	0	914	0	1	2	0	3	0	61	0	1	0	25	0	0	0	0	0	0	3	0	6	0	0	0	0	0	2401	0	0	1
Catostomus commersonii	2	2	2	0	1	6	0	0	1	0	4	0	2	4	0	0	973	1	0	4	1	1196	0	2	2	0	1	0	0	0	7	0	245	1	0	1	0	2	7	0	64	20	0	3	2	1	1	0	7
Carassius auratus	0	0	0	1	0	0	0	0	0	0	0	0	0	0	0	0	0	0	0	0	0	0	0	0	0	0	0	0	0	0	0	0	0	0	0	0	0	0	0	0	0	0	0	0	0	0	0	0	0
Micropterus salmoides	0	0	5	6	2	0	3	7	2	0	0	0	8	0	0	0	1	0	0	0	0	1	1	0	0	0	0	0	0	0	2	0	661	2	0	0	0	1	14	3	0	0	13	10	0	1	1	2	0
Culaea inconstans	0	0	0	0	0	0	0	0	0	0	0	0	0	0	0	0	0	0	0	0	0	0	0	0	0	0	0	0	0	0	0	0	0	0	0	0	0	0	0	0	0	0	1	0	0	40	0	0	0
Ambloplites rupestris	20	10	13815	5362	8303	25	2285	2963	2	10	4	6	4	3	4	5051	6948	1468	3775	74	4737	14148	5942	3705	3	5	13	13	2	4	7	0	1244	2948	7686	5917	1421	4783	12	4	5	0	2	8	5685	9005	6111	79	3
Esox masquinongy	0	0	0	0	415	6	0	0	0	0	0	0	1	0	0	0	1	0	0	11	0	1	19	0	0	1	0	0	0	0	1	0	1	796	261	0	1038	0	0	3	0	0	0	0	0	0	0	0	0
Percina maculata	0	0	30	18	23	0	3	9	0	0	0	0	0	0	0	0	50	0	8	0	55	0	5	12	0	0	0	1	0	1	0	0	7	23	7	0	6	9	1	0	0	0	6	1	12	6	27	13	0
Ictalurus punctatus	34	3	18070	26693	17441	0	2	10	3	7	1	2	3	0	7	1265	6485	1155	0	0	14	6	0	1	0	0	0	0	0	0	0	0	0	2	1	4	0	1	7	3	2	0	3	7	0	4	11	1	0
Pomoxis nigromaculatus	0	0	0	0	0	0	0	0	0	0	0	0	0	0	0	0	0	0	0	0	0	0	0	0	0	0	0	0	0	0	0	0	0	0	0	0	0	0	0	0	0	0	0	0	0	0	0	0	0
Etheostoma olmstedi	1	1	1514	2033	9087	0	2	6	1	2	1	2	3	0	4	8961	2	391	1	0	4	2	9	1	0	1	0	0	0	0	0	0	638	1	7	0	0	8	0	0	0	0	1	1	0	0	7	3	0
Etheostoma exile	0	0	0	0	0	0	0	0	0	0	0	0	0	0	0	0	0	0	0	0	0	0	0	0	0	0	0	0	0	0	0	0	0	0	0	0	0	0	0	0	0	0	0	0	0	0	0	0	0
ICHTHYOMYZON	0	0	0	0	0	0	0	0	0	0	0	0	0	0	1	0	0	0	0	0	364	0	0	0	0	0	0	0	0	0	0	0	0	0	0	1	0	1	0	0	0	0	0	1	0	0	0	0	0
Campostoma anomalum	0	0	0	0	0	0	0	0	0	0	0	0	0	0	0	1	0	0	0	0	0	1	0	0	0	0	0	0	0	0	0	0	0	0	0	0	0	0	0	0	0	0	0	0	0	0	0	1	0
CYPRINID3	0	0	9	18	11	0	13	47	1	0	0	1	0	0	0	14	21	6	14	9	37	35	84	48	0	0	0	0	0	0	0	0	2	25	55	156	92	16	0	0	0	2	10	88	48	11	27	15	1
Cottus cognatus	0	0	0	0	0	0	0	0	0	0	0	0	0	0	0	0	0	0	0	0	0	0	0	0	0	0	0	0	0	4	0	0	0	0	0	0	0	0	0	0	0	0	0	0	0	0	0	0	0
Ictalurus haplotype 1	6	2	1469	1322	826	0	418	801	12	11	7	7	20	12	2	658	1830	106	205	2	4438	5051	0	7163	0	2	8	3	2	2	2	0	1	4688	5448	7951	4	8488	15	26	80	525	11783	3347	4	8359	1664	4879	5
Percina caprodes	0	0	2863	1909	2329	0	0	2457	2	1	0	0	2	0	2	3	4113	466	1966	1	2970	1	1773	1775	0	1	4	6	0	2	0	0	1226	1453	2010	1	1268	2079	1	6	4	0	2814	0	3215	753	1387	2040	1
Etheostoma flabellare	1	3	4379	4613	4710	43	692	4225	3	12	4	9	5	2	3	2944	11929	1350	938	2182	1362	4276	9241	15011	2	3	11	16	1	4	2	1	448	3435	7108	3	13	1134	63	7	540	672	5909	4227	3	4395	8751	11928	23
Lepomis haplotype 1	0	0	10	19	0	0	6	43	0	0	0	0	0	0	0	0	0	0	0	0	0	0	0	0	0	0	0	0	0	0	0	0	1	7	0	1	0	0	0	0	0	0	18	121	0	0	0	0	0
Ameiurus melas	0	0	0	0	681	0	3	0	0	1	0	0	0	0	0	0	5	3	0	0	0	0	0	0	0	0	0	0	0	0	0	0	4	7	0	0	0	1	0	0	0	0	0	13	0	0	0	0	1
Hybopsis amblops	0	0	2	0	0	0	0	0	0	0	0	0	0	0	0	0	0	0	0	0	1	0	0	0	0	0	0	0	0	0	0	0	0	1	0	1	1	0	0	0	0	0	0	0	1	1	0	0	0
Lepomis haplotype 2	0	0	95	164	0	0	38	99	0	0	0	0	0	0	0	0	0	0	0	0	0	0	0	0	0	0	1	0	0	0	0	0	3	49	0	0	0	0	0	0	0	0	214	253	0	0	0	0	0
Cyprinella spiloptera	3	0	2664	1411	1896	0	1	3100	5	2	2	1	2	0	0	3	6336	1621	2	3	8697	11	1	4649	2	3	5	6	1	2	4	0	1	2	1	3638	5477	5992	4	6	7	0	2	4125	5399	6069	5	4	0
Notemigonus crysoleucas	1	0	0	2	0	8	559	0	0	0	0	0	0	0	1	3	1	0	0	1	0	1	0	1	0	144	0	0	0	1	12	0	258	0	1	1	0	2091	2	0	0	1	0	3	0	0	0	0	0
Clinostomus elongatus	0	0	0	0	0	0	0	0	0	0	0	0	0	0	0	0	0	0	0	0	0	0	0	0	0	0	0	0	0	0	0	0	0	0	0	0	0	0	0	0	0	0	0	1	0	0	0	0	0
Perca flavescens	0	0	1	2	0	0	0	0	0	0	0	1	0	0	3	0	0	0	0	1	1	0	0	0	0	0	1	0	0	2	9	0	439	0	1	0	0	0	0	0	0	0	0	1	1	0	0	1	1
Percina macrocephala	0	1	2963	1773	2358	0	2	2405	0	6	1	1	2	0	4	1	4123	495	2024	2	3041	7	1781	1849	1	3	0	3	1	0	0	0	1223	1497	2021	2	1289	1994	2	0	2	0	2980	0	3118	759	1520	2160	0
Morone americana	0	0	0	0	0	0	0	0	0	0	0	0	0	0	0	0	0	0	0	0	0	0	0	0	0	0	0	0	0	0	0	0	0	1	0	0	0	0	0	0	0	0	0	0	0	0	0	0	0
Noturus flavus	0	0	0	0	0	0	0	0	0	0	0	0	0	0	0	0	1	0	0	0	0	0	0	0	0	0	0	0	0	0	0	0	0	0	0	0	0	0	0	0	0	0	0	0	0	0	0	0	0
Esox lucius	1	0	0	587	1	0	188	0	0	0	5	0	0	0	0	0	55	0	0	238	0	776	0	0	0	1	0	0	0	0	0	0	275	5	0	755	1	1	5	3	0	0	0	0	0	0	0	0	4
Exoglossum laurae	0	0	0	0	0	0	0	0	0	0	0	0	0	0	0	0	0	0	0	0	0	0	0	0	0	0	0	0	0	0	0	0	0	0	0	0	0	0	2	0	0	0	0	1	0	0	1	0	0
Percina copelandi	3	9	3324	2814	2819	3	930	12	0	4	1	4	2	0	0	0	4536	2	9	1	7839	11	8	2702	1	1	1	5	0	0	0	0	8	4193	11	0	5	14	0	2	0	0	16	0	12	3	4367	12	1
Rhinichthys cataractae	1	1	3	2695	0	1	0	0	3	0	0	11	10	3	0	1	3	1	0	0	6	2	0	4655	0	0	0	1	0	0	0	1	1	2	8708	4	1149	3567	22	1	218	821	0	9277	1	2	0	1797	11
Ameiurus nebulosus	1	0	2	1	1	2	972	0	0	1	1	0	2	0	3	1	835	142	16	0	1	0	0	0	0	0	0	0	0	0	10	0	586	1354	0	0	0	388	1	0	14	0	0	2805	0	0	0	0	5
Micropterus dolomieu	21	9	11407	7980	8945	3	2156	3365	20	17	8	14	7	5	1	1677	4847	170	2525	21095	5121	3539	8383	4336	2	9	17	8	2	8	0	1	5	6036	12428	3761	1407	1679	17	13	9	6	15273	7959	6768	4801	4369	11748	5
Ameiurus catus	0	0	82	104	95	0	2	1	0	0	0	0	0	0	0	3	19	4	1	0	1	1	0	0	0	0	0	0	0	0	0	0	0	5	0	0	0	1	0	0	0	0	0	10	0	0	0	0	0
Etheostoma caeruleum	0	0	0	1	0	0	0	1	0	0	0	0	0	0	0	0	0	0	0	0	0	0	0	0	0	0	0	0	0	0	0	0	0	0	0	0	0	1	0	0	0	1	0	0	0	0	0	0	0
CYPRINID1	0	0	0	1	0	0	0	2	0	0	0	0	0	0	0	0	1	0	0	0	1	1	0	12	179	366	267	0	0	1	0	0	1	1	40	1	3	11	0	0	18	6	0	21	2	0	18	4	1
Lepomis megalotis	0	0	0	0	0	0	0	0	0	0	0	0	0	0	0	0	0	0	0	0	0	0	0	0	0	0	0	0	0	0	0	0	0	0	0	0	0	0	0	0	0	0	0	1	0	0	0	0	0
Sander canadensis	0	0	2	3	6	0	0	1	0	0	0	0	0	0	0	1	1	0	0	0	19	0	3	7	0	0	0	0	0	0	0	0	1	2	3	0	0	1	0	0	0	0	3	0	0	1	6	5	0
Etheostoma nigrum	2	0	163	1843	131	0	723	31	0	7	2	1	0	1	5	84	43	8	443	14	1397	83	2384	1746	0	0	3	3	0	0	0	0	35	153	3498	153	133	4063	2	2	6	10	126	24	1	32	2923	3229	0
Etheostoma haplotype 1	3	2	4047	2699	27	3	9	100	2	9	1	0	4	0	0	2985	2195	0	229	2	5021	2982	2129	17	1	2	8	8	1	0	0	0	580	1597	32	3512	4556	15852	12	11	10	3	2939	2	2	2	2695	20	1
Exoglossum maxillingua	0	0	0	0	0	1	0	0	0	2	0	1	0	1	1	0	0	0	0	0	0	0	1	0	0	0	0	2	0	0	0	0	0	0	0	0	0	0	13	0	40	321	0	0	1	0	2080	0	6
SALVELINUS	14	2	0	0	0	0	0	0	2	0	0	0	0	0	0	0	0	1	0	0	0	2	0	0	172	322	14	37	2	22	0	0	0	0	1	0	0	0	0	0	6	6	0	0	0	0	0	0	0
Salmo trutta	0	0	0	0	0	0	0	0	0	0	0	0	0	11	0	0	0	0	0	0	0	0	0	0	0	0	0	0	0	0	0	0	0	0	0	0	0	0	0	2	0	0	0	0	0	0	0	0	6
Salmo salar	0	0	0	0	0	0	0	0	1	0	0	0	0	0	0	0	0	0	0	0	0	0	0	0	0	0	0	0	0	0	0	0	0	0	0	0	0	0	0	0	0	0	0	0	0	0	0	0	0
Nocomis biguttatus	0	0	0	0	0	0	0	0	0	0	0	0	0	0	0	0	0	0	0	0	0	0	0	0	0	0	0	0	0	0	0	0	0	0	0	0	1	0	0	0	0	0	0	0	0	0	1	0	0
Oncorhynchus mykiss	0	0	0	0	0	0	0	0	0	0	0	0	0	0	0	0	0	0	0	0	0	0	0	0	0	0	0	0	0	0	0	0	0	0	1	0	0	0	1	0	0	28	0	0	0	0	0	0	2
Lepomis gibbosus	2	0	2852	3698	0	11	1158	3188	8	2	0	5	4	0	3	3	1	0	2	0	2	0	0	4	1	0	4	0	0	0	4	0	302	1792	1	2	0	1	4	6	2	0	5946	8211	2	0	3	0	1
Ammocrypta pellucida	0	0	0	0	0	0	0	0	0	0	0	0	0	0	0	1	0	0	456	0	0	0	0	0	0	0	0	0	0	0	0	0	0	0	0	0	0	0	0	0	0	0	0	0	0	0	0	0	0
Cyprinus carpio	1	0	2572	4139	2671	0	0	0	0	3	0	1	0	1	9	14688	0	0	0	0	3	0	0	0	0	0	0	0	0	2	1	0	0	0	0	0	0	0	0	0	1	0	0	0	1	0	0	0	0
Lepomis auritus	0	0	15	31	0	0	4	23	0	0	0	0	0	0	0	0	0	0	0	0	0	0	0	0	0	0	0	0	0	0	0	0	3	9	0	0	0	0	0	0	0	0	32	37	0	0	0	0	0
CYPRINID2	9	10	9762	7010	4070	39	3643	7901	7	15	11	8	4	0	11	5292	14944	5487	12757	2182	14524	8207	25137	7815	8	7	13	10	1	7	34	0	149	4124	4418	28579	16337	23	7	12	10	6	4130	9592	11772	3039	8100	1892	4
Semotilus atromaculatus	13	6	8	2579	7419	9	642	7714	16	13	7	8	47	2	7	5600	7102	2043	2528	17426	4527	9296	8509	8674	1229	1134	104	11	8	14	26	0	1156	9345	12562	21511	14821	10777	51	32	314	1198	3823	10753	5956	7904	4669	8064	19
Petromyzon marinus	2	0	0	0	0	0	0	0	0	0	0	0	0	0	0	0	0	0	0	0	1	0	0	0	0	0	0	0	0	0	0	0	0	0	0	0	0	0	0	0	0	0	0	0	0	0	0	0	0
Noturus gyrinus	0	0	0	0	0	0	0	0	0	0	0	0	0	0	0	0	0	0	0	0	2	0	0	0	0	0	0	0	0	0	0	0	0	0	0	0	0	0	0	0	0	0	0	0	0	0	0	0	0
Catostomus catostomus	0	0	1	4	7	0	1	2	0	0	0	0	0	0	0	8	8	1	3	9	6	25	9	1	0	0	0	0	0	0	0	0	5	6	1	3	1	3	0	0	0	0	7	4	7	2	2	6	0
Moxostoma anisurum	39	26	19785	35679	23626	104	6201	12801	46	36	32	38	25	19	66	29341	34417	8647	14446	38996	24779	36463	37223	24895	14	32	86	42	3	21	4	3	2206	11365	8539	12066	11545	9754	114	28	72	15	40291	18536	19304	18649	18564	27742	3
Umbra limi	0	0	0	0	0	0	0	0	0	0	0	0	0	0	0	0	0	0	0	0	0	0	0	0	0	0	0	0	0	0	0	0	0	0	0	0	0	0	0	0	0	0	0	0	0	0	0	0	0
Noturus insignis	0	0	0	1	0	0	0	0	0	0	0	0	0	0	0	0	0	0	0	0	0	0	0	0	0	0	0	0	0	0	0	0	0	0	0	0	0	0	0	0	0	0	0	0	0	0	0	0	0
Sander vitreus	3	4	21	6384	14	1	1	7	0	3	3	8	4	4	3	12887	21449	5110	3	3	10364	4762	3	6	0	1	5	6	0	1	0	0	0	3	2	5	1	1779	12	8	11	0	5	1	1	4659	6196	3	8
Oncorhynchus tshawytscha	0	0	0	0	0	0	0	0	0	0	0	0	0	0	0	0	0	0	0	0	0	0	0	0	0	0	0	0	0	0	0	0	0	1725	0	0	0	0	0	0	0	0	0	0	0	0	0	0	0
[truncated: 35 more columns]

## Sheet: analyzed samples
	134335	123599	102647	101937	99337	97923	96348	91476	90888	89092	88155	88030	83170	82140	82083	79456	79089	77489	75648	74521	74072	73506	71928	71921	68114	66745	63322	61318	60570	56655	51322	48559	46804	42351	41275	40330	38946	28678	20657	11715	3831	2050	2035	1811	1588
taxon	STD015dup_S75	STD003dup_S74	STD020_S20	STD002_S2	STD018_S18	STD003_S3	STD037dup_S79	STD014_S14	STD019_S19	STD021_S21	STD047_S47	STD032dup_S77	STD017_S17	STD056dup_S82	STD050_S50	STD037_S37	STD058_S58	STD031_S31	STD040_S40	STD033_S33	STD039_S39	STD040dup_S80	STD059_S59	STD049_S49	STD057_S57	STD051_S51	STD055_S55	STD038_S38	STD032_S32	STD030_S30	STD006_S6	STD054_S54	STD056_S56	STD016_S16	STD052_S52	STD053_S53	STD043_S43	STD015_S15	STD005_S5	STD029_S29	STD036_S36	STD022_S22	STD022dup_S76	STD063_S63	STD036dup_S78
Culaea haplotype 1	0	0	0	0	0	2	0	0	0	0	0	0	0	0	0	0	0	2626	0	1	3173	0	0	0	0	0	0	0	0	0	0	0	0	0	0	0	11792	0	0	0	179	12	415	0	27
Rhinichthys atratulus	0	0	0	0	1	0	1	0	0	0	655	0	0	0	0	0	0	0	0	0	0	0	0	0	0	0	0	0	0	0	0	0	0	0	0	0	0	0	0	0	9	0	0	87	106
Pimephales promelas	1	0	0	0	0	0	0	0	0	5	2	1	0	4	0	12	0	11	0	2	0	0	0	0	3	0	0	0	1	0	0	0	0	0	0	0	0	0	0	0	2	0	0	5	20
ACIPENSER	1059	0	2	0	0	6	0	0	1	0	0	0	914	0	4	0	0	0	0	3	2401	0	6864	2	1737	0	1	0	0	0	1	0	2274	0	3441	1542	2	0	0	0	0	0	3	0	0
Catostomus commersonii	973	0	0	2	1	1	0	0	1196	2	13813	1	4	1	1	3	1	0	0	2	1	1	1	3414	1352	1926	0	2	0	1	0	1	0	0	0	1	0	1	0	245	20	0	2	0	64
Carassius auratus	0	1	0	0	0	0	0	0	0	0	0	0	0	0	0	0	0	0	0	0	0	0	0	0	0	0	0	0	0	0	0	0	0	0	0	0	0	0	0	0	0	0	0	0	0
Micropterus salmoides	1	6	1	5	0	2	13	0	1	0	1321	0	0	0	27	10	3	0	2	1	1	1	6650	1	4	3038	1	0	0	2	7	7	1	0	3164	2	1	0	3	661	0	0	0	0	0
Culaea inconstans	0	0	0	0	0	0	1	0	0	0	0	0	0	0	0	0	0	0	0	0	40	0	0	0	0	0	0	0	0	0	0	0	0	0	0	0	11	0	0	0	0	0	0	0	0
Ambloplites rupestris	6948	5362	5942	13815	4737	8303	2	5051	14148	3705	10790	5917	74	4765	8612	8	7785	7686	79	4783	9005	6111	2	6761	2	7270	5	5685	1421	2948	2963	5591	1430	3775	4895	8070	0	1468	2285	1244	0	5	3	4	5
Esox masquinongy	1	0	19	0	0	415	0	0	1	0	0	0	11	0	3	0	1	261	0	0	0	0	5341	12	1	2	0	0	1038	796	0	6	0	0	0	0	0	0	0	1	0	1	0	1	0
Percina maculata	50	18	5	30	55	23	6	0	0	12	0	0	0	0	31	1	0	7	13	9	6	27	6	1	21	6	4	12	6	23	9	3	0	8	2	0	0	0	3	7	0	0	0	1	0
Ictalurus punctatus	6485	26693	0	18070	14	17441	3	1265	6	1	1	4	0	13	4	7	1	1	1	1	4	11	0	0	0	1098	1	0	0	2	10	0	1	0	0	1	1	1155	2	0	0	0	0	0	2
Pomoxis nigromaculatus	0	0	0	0	0	0	0	0	0	0	2008	0	0	0	0	0	0	0	0	0	0	0	0	0	0	0	0	0	0	0	0	0	0	0	0	0	0	0	0	0	0	0	0	0	0
Etheostoma olmstedi	2	2033	9	1514	4	9087	1	8961	2	1	0	0	0	4	2152	1	1	7	3	8	0	7	1	4	0	1	0	0	0	1	6	3	3	1	0	1	1	391	2	638	0	1	0	0	0
Etheostoma exile	0	0	0	0	0	0	0	0	0	0	0	0	0	0	0	0	0	0	0	0	0	0	0	0	0	0	0	0	0	0	0	0	0	0	0	1	0	0	0	0	0	0	0	0	0
ICHTHYOMYZON	0	0	0	0	364	0	0	0	0	0	0	1	0	0	0	1	0	0	0	1	0	0	0	1028	0	0	0	0	0	0	0	0	0	0	1	685	0	0	0	0	0	0	0	0	0
Campostoma anomalum	0	0	0	0	0	0	0	1	1	0	0	0	0	0	0	0	0	0	1	0	0	0	0	0	0	0	0	0	0	0	0	0	0	0	0	0	0	0	0	0	0	0	0	0	0
CYPRINID3	21	18	84	9	37	11	10	14	35	48	16	156	9	43	0	88	20	55	15	16	11	27	13	51	36	0	29	48	92	25	47	28	27	14	0	8	1	6	13	2	2	0	0	0	0
Cottus cognatus	0	0	0	0	0	0	0	0	0	0	0	0	0	0	0	0	0	0	0	0	0	0	0	0	0	0	0	0	0	0	0	0	0	0	0	0	0	0	0	0	0	0	0	0	0
Ictalurus haplotype 1	1830	1322	0	1469	4438	826	11783	658	5051	7163	0	7951	2	11332	1	3347	2797	5448	4879	8488	8359	1664	0	2745	5366	0	371	4	4	4688	801	3	2134	205	0	2413	0	106	418	1	525	2	0	0	80
Percina caprodes	4113	1909	1773	2863	2970	2329	2814	3	1	1775	0	1	1	0	2	0	0	2010	2040	2079	753	1387	4561	0	850	2	683	3215	1268	1453	2457	759	2	1966	864	0	0	466	0	1226	0	1	0	0	4
Etheostoma flabellare	11929	4613	9241	4379	1362	4710	5909	2944	4276	15011	1	3	2182	6546	4	4227	5956	7108	11928	1134	4395	8751	0	0	4	1	231	3	13	3435	4225	1	3	938	1	2	0	1350	692	448	672	3	2	1	540
Lepomis haplotype 1	0	19	0	10	0	0	18	0	0	0	41	1	0	0	12	121	0	0	0	0	0	0	0	0	0	13	1	0	0	7	43	26	10	0	0	0	0	0	6	1	0	0	0	0	0
Ameiurus melas	5	0	0	0	0	681	0	0	0	0	21	0	0	0	23	13	0	0	0	1	0	0	0	0	0	2	0	0	0	7	0	0	0	0	0	2	0	3	3	4	0	0	0	0	0
Hybopsis amblops	0	0	0	2	1	0	0	0	0	0	0	1	0	1	0	0	0	0	0	0	1	0	0	0	0	0	4	1	1	1	0	1	1	0	0	0	0	0	0	0	0	0	0	0	0
Lepomis haplotype 2	0	164	0	95	0	0	214	0	0	0	66	0	0	0	190	253	0	0	0	0	0	0	0	0	0	332	0	0	0	49	99	80	58	0	56	0	0	0	38	3	0	0	0	0	0
Cyprinella spiloptera	6336	1411	1	2664	8697	1896	2	3	11	4649	0	3638	3	5787	8	4125	0	1	4	5992	6069	5	9281	6008	3	4	12095	5399	5477	2	3100	4632	3814	2	0	7	0	1621	1	1	0	3	2	0	7
Notemigonus crysoleucas	1	2	0	0	0	0	0	3	1	1	4229	1	1	1	0	3	0	1	0	2091	0	0	0	0	0	0	1	0	0	0	0	0	0	0	0	1	1	0	559	258	1	144	0	0	0
Clinostomus elongatus	0	0	0	0	0	0	0	0	0	0	0	0	0	0	0	1	0	0	0	0	0	0	0	0	0	0	0	0	0	0	0	0	0	0	0	0	3	0	0	0	0	0	0	0	0
Perca flavescens	0	2	0	1	1	0	0	0	0	0	7920	0	1	0	5482	1	2	1	1	0	0	0	0	1	0	1071	0	1	0	0	0	1	0	0	0	0	0	0	0	439	0	0	0	0	0
Percina macrocephala	4123	1773	1781	2963	3041	2358	2980	1	7	1849	0	2	2	2	0	0	0	2021	2160	1994	759	1520	4523	0	872	3	671	3118	1289	1497	2405	794	1	2024	889	0	0	495	2	1223	0	3	1	0	2
Morone americana	0	0	0	0	0	0	0	0	0	0	0	0	0	0	0	0	0	0	0	0	0	0	0	1	0	0	0	0	0	1	0	0	0	0	0	0	0	0	0	0	0	0	0	0	0
Noturus flavus	1	0	0	0	0	0	0	0	0	0	0	0	0	0	0	0	0	0	0	0	0	0	0	0	0	0	0	0	0	0	0	0	0	0	0	0	0	0	0	0	0	0	0	0	0
Esox lucius	55	587	0	0	0	1	0	0	776	0	0	755	238	0	1725	0	1020	0	0	1	0	0	8	7749	0	13	2	0	1	5	0	1742	0	0	1	990	0	0	188	275	0	1	0	0	0
Exoglossum laurae	0	0	0	0	0	0	0	0	0	0	3	0	0	0	0	1	0	0	0	0	0	1	0	0	0	0	0	0	0	0	0	0	0	0	0	0	0	0	0	0	0	0	0	0	0
Percina copelandi	4536	2814	8	3324	7839	2819	16	0	11	2702	0	0	1	2	5417	0	0	11	12	14	3	4367	20	3	3783	1930	2	12	5	4193	12	3	3	9	6	0	0	2	930	8	0	1	1	0	0
Rhinichthys cataractae	3	2695	0	3	6	0	0	1	2	4655	2366	4	0	4873	1	9277	0	8708	1797	3567	2	0	0	1182	2	0	0	1	1149	2	0	0	0	0	0	2	0	1	0	1	821	0	0	0	218
Ameiurus nebulosus	835	1	0	2	1	1	0	1	0	0	2585	0	0	1	5168	2805	0	0	0	388	0	0	0	0	0	477	0	0	0	1354	0	0	2	16	0	844	0	142	972	586	0	0	0	0	14
Micropterus dolomieu	4847	7980	8383	11407	5121	8945	15273	1677	3539	4336	2	3761	21095	9	15443	7959	7626	12428	11748	1679	4801	4369	4116	4025	3926	6	2523	6768	1407	6036	3365	4225	1450	2525	6716	2047	0	170	2156	5	6	9	2	4	9
Ameiurus catus	19	104	0	82	1	95	0	3	1	0	8	0	0	0	10	10	0	0	0	1	0	0	0	0	0	6	0	0	0	5	1	0	0	1	0	1	0	4	2	0	0	0	0	0	0
Etheostoma caeruleum	0	1	0	0	0	0	0	0	0	0	0	0	0	0	0	0	0	0	0	1	0	0	0	0	0	0	0	0	0	0	1	0	0	0	0	0	0	0	0	0	1	0	0	0	0
CYPRINID1	1	1	0	0	1	0	0	0	1	12	17	1	0	7	0	21	0	40	4	11	0	18	0	1	0	0	0	2	3	1	2	0	2	0	0	0	8888	0	0	1	6	366	179	70	18
Lepomis megalotis	0	0	0	0	0	0	0	0	0	0	0	0	0	0	0	1	0	0	0	0	0	0	0	0	0	0	0	0	0	0	0	0	0	0	0	0	0	0	0	0	0	0	0	0	0
Sander canadensis	1	3	3	2	19	6	3	1	0	7	0	0	0	0	2	0	0	3	5	1	1	6	0	0	1	0	0	0	0	2	1	0	0	0	0	0	0	0	0	1	0	0	0	0	0
Etheostoma nigrum	43	1843	2384	163	1397	131	126	84	83	1746	1	153	14	4316	11	24	31	3498	3229	4063	32	2923	1	2813	0	13	2	1	133	153	31	10	3872	443	1	1671	0	8	723	35	10	0	0	0	6
Etheostoma haplotype 1	2195	2699	2129	4047	5021	27	2939	2985	2982	17	0	3512	2	15	16	2	1	32	20	15852	2	2695	0	1834	2	1510	1	2	4556	1597	100	1163	21	229	0	12	0	0	9	580	3	2	1	2	10
Exoglossum maxillingua	0	0	1	0	0	0	0	0	0	0	2273	0	0	0	0	0	0	0	0	0	0	2080	0	0	0	0	0	1	0	0	0	0	2	0	0	0	0	0	0	0	321	0	0	0	40
SALVELINUS	0	0	0	0	0	0	0	0	2	0	785	0	0	0	0	0	0	1	0	0	0	0	2	0	0	1	0	0	0	0	0	0	0	0	0	0	5499	1	0	0	6	322	172	1546	6
Salmo trutta	0	0	0	0	0	0	0	0	0	0	0	0	0	0	0	0	0	0	0	0	0	0	0	0	0	0	0	0	0	0	0	0	0	0	0	0	0	0	0	0	0	0	0	0	0
Salmo salar	0	0	0	0	0	0	0	0	0	0	0	0	0	0	0	0	0	0	0	0	0	0	0	0	0	0	0	0	0	0	0	0	0	0	0	0	0	0	0	0	0	0	0	0	0
Nocomis biguttatus	0	0	0	0	0	0	0	0	0	0	0	0	0	0	0	0	0	0	0	0	0	1	0	0	0	0	0	0	1	0	0	0	0	0	0	0	0	0	0	0	0	0	0	0	0
Oncorhynchus mykiss	0	0	0	0	0	0	0	0	0	0	0	0	0	0	0	0	0	1	0	0	0	0	0	0	0	0	0	0	0	0	0	0	0	0	0	0	0	0	0	0	28	0	0	0	0
Lepomis gibbosus	1	3698	0	2852	2	0	5946	3	0	4	16556	2	0	4	10299	8211	1	1	0	1	0	3	0	1	0	8216	124	2	0	1792	3188	2450	1888	2	1753	4	0	0	1158	302	0	0	1	0	2
Ammocrypta pellucida	0	0	0	0	0	0	0	1	0	0	0	0	0	0	0	0	0	0	0	0	0	0	0	0	0	0	0	0	0	0	0	0	0	456	0	0	0	0	0	0	0	0	0	0	0
Cyprinus carpio	0	4139	0	2572	3	2671	0	14688	0	0	0	0	0	2	0	0	0	0	0	0	0	0	0	0	0	0	0	1	0	0	0	2	0	0	0	0	0	0	0	0	0	0	0	0	1
Lepomis auritus	0	31	0	15	0	0	32	0	0	0	113	0	0	0	61	37	0	0	0	0	0	0	0	0	0	55	3	0	0	9	23	22	10	0	9	0	0	0	4	3	0	0	0	0	0
CYPRINID2	14944	7010	25137	9762	14524	4070	4130	5292	8207	7815	6833	28579	2182	5547	13	9592	6747	4418	1892	23	3039	8100	3386	12661	15289	1	11475	11772	16337	4124	7901	10338	7555	12757	3	2544	0	5487	3643	149	6	7	8	2	10
Semotilus atromaculatus	7102	2579	8509	8	4527	7419	3823	5600	9296	8674	15717	21511	17426	10643	3821	10753	5324	12562	8064	10777	7904	4669	14211	5201	5703	2903	6016	5956	14821	9345	7714	1239	7637	2528	4	5002	12742	2043	642	1156	1198	1134	1229	84	314
Petromyzon marinus	0	0	0	0	1	0	0	0	0	0	0	0	0	0	0	0	0	0	0	0	0	0	0	5	0	0	0	0	0	0	0	0	0	0	0	1	0	0	0	0	0	0	0	0	0
Noturus gyrinus	0	0	0	0	2	0	0	0	0	0	0	0	0	1896	0	0	0	0	0	0	0	0	0	0	0	0	0	0	0	0	0	0	0	0	0	0	0	0	0	0	0	0	0	0	0
Catostomus catostomus	8	4	9	1	6	7	7	8	25	1	2	3	9	6	5	4	4	1	6	3	2	2	1	26	17	22	9	7	1	6	2	4	0	3	2	3	0	1	1	5	0	0	0	0	0
Moxostoma anisurum	34417	35679	37223	19785	24779	23626	40291	29341	36463	24895	9	12066	38996	26307	17809	18536	29784	8539	27742	9754	18649	18564	12938	15773	22813	27844	29059	19304	11545	11365	12801	15355	14601	14446	17388	13408	3	8647	6201	2206	15	32	14	2	72
Umbra limi	0	0	0	0	0	0	0	0	0	0	0	0	0	0	0	0	0	0	0	0	0	0	0	614	0	0	0	0	0	0	0	0	0	0	0	0	0	0	0	0	0	0	0	0	0
Noturus insignis	0	1	0	0	0	0	0	0	0	0	0	0	0	0	0	0	0	0	0	0	0	0	0	0	0	0	0	0	0	0	0	0	0	0	0	0	0	0	0	0	0	0	0	0	0
Sander vitreus	21449	6384	3	21	10364	14	5	12887	4762	6	1	5	3	13	5726	1	11984	2	3	1779	4659	6196	2	4	6327	8979	8	1	1	3	7	70	2	3	2079	1065	1	5110	1	0	0	1	0	2	11
Oncorhynchus tshawytscha	0	0	0	0	0	0	0	0	0	0	0	0	0	0	0	0	0	0	0	0	0	0	0	0	0	0	0	0	0	1725	0	0	0	0	0	0	0	0	0	0	0	0	0	0	0
