# Supplementary material for: Composition and distribution of fish environmental DNA in an Adirondack watershed
Source: PeerJ. 2021 Feb 26;9:e10539. doi: 10.7717/peerj.10539 (PMC7919543; doi:10.7717/peerj.10539)
Supplement: Supplemental Information 23 — Reads were clustered with vsearch and cluster representative searched against the nt database. Each cluster was assigned the basal taxonomy of the top matches, if any, selected as described in the methods. This spreadsheet lists the taxonomic assignment and alignment statistics of the top hits. [file peerj-09-10539-s023.xlsx]

## Sheet: LCA assignments
Supplemental File S6. Lowest common ancestor (LCA) taxonomic analysis of residual reads not assigned to a taxonomic bin by direct mapping to references.
operational taxonomic unit (98% identity cluster)	taxon assignment	max BLASTN bit score	rank	average %id of taxon	cluster size (number of reads)		NCBI taxonomic hierarchy
C26T3:1:1106:13424:18247	Abramis brama	171	species	98	3		Abramis brama	38527	38527	species	Abramis brama	38526	genus	Abramis	7953	family	Cyprinidae	7952	order	Cypriniformes	186623	class	Actinopteri	7711	phylum	Chordata
C26T3:1:1106:23570:22313	Abramis brama	165	species	98	7		Abramis brama	38527	38527	species	Abramis brama	38526	genus	Abramis	7953	family	Cyprinidae	7952	order	Cypriniformes	186623	class	Actinopteri	7711	phylum	Chordata
C26T3:1:2108:11714:11426	Aix sponsa	193	species	99	3		Aix sponsa	8833	8833	species	Aix sponsa	8831	genus	Aix	8830	family	Anatidae	8826	order	Anseriformes	8782	class	Aves	7711	phylum	Chordata
C26T3:1:1107:20070:15996	Aix sponsa	182	species	99	9		Aix sponsa	8833	8833	species	Aix sponsa	8831	genus	Aix	8830	family	Anatidae	8826	order	Anseriformes	8782	class	Aves	7711	phylum	Chordata
C26T3:1:1101:12760:8539	Aix sponsa	167	species	100	68		Aix sponsa	8833	8833	species	Aix sponsa	8831	genus	Aix	8830	family	Anatidae	8826	order	Anseriformes	8782	class	Aves	7711	phylum	Chordata
C26T3:1:1105:5405:16388	Aix sponsa	165	species	100	3		Aix sponsa	8833	8833	species	Aix sponsa	8831	genus	Aix	8830	family	Anatidae	8826	order	Anseriformes	8782	class	Aves	7711	phylum	Chordata
C26T3:1:1104:13901:17277	Alburnus mossulensis	180	species	99	8		Alburnus mossulensis	155060	155060	species	Alburnus mossulensis	54555	genus	Alburnus	7953	family	Cyprinidae	7952	order	Cypriniformes	186623	class	Actinopteri	7711	phylum	Chordata
C26T3:1:1104:20689:21718	Ambloplites rupestris	195	species	97	12		Ambloplites rupestris	109273	109273	species	Ambloplites rupestris	109272	genus	Ambloplites	8180	family	Centrarchidae	1489940	order	Centrarchiformes	186623	class	Actinopteri	7711	phylum	Chordata
C26T3:1:1107:19289:6821	Ambloplites rupestris	195	species	97	4		Ambloplites rupestris	109273	109273	species	Ambloplites rupestris	109272	genus	Ambloplites	8180	family	Centrarchidae	1489940	order	Centrarchiformes	186623	class	Actinopteri	7711	phylum	Chordata
C26T3:1:1114:11472:21029	Ambloplites rupestris	195	species	97	8		Ambloplites rupestris	109273	109273	species	Ambloplites rupestris	109272	genus	Ambloplites	8180	family	Centrarchidae	1489940	order	Centrarchiformes	186623	class	Actinopteri	7711	phylum	Chordata
C26T3:1:2103:11258:1976	Ambloplites rupestris	193	species	97	2		Ambloplites rupestris	109273	109273	species	Ambloplites rupestris	109272	genus	Ambloplites	8180	family	Centrarchidae	1489940	order	Centrarchiformes	186623	class	Actinopteri	7711	phylum	Chordata
C26T3:1:1101:18717:17729	Ambloplites rupestris	191	species	99.3333	2		Ambloplites rupestris	109273	109273	species	Ambloplites rupestris	109272	genus	Ambloplites	8180	family	Centrarchidae	1489940	order	Centrarchiformes	186623	class	Actinopteri	7711	phylum	Chordata
C26T3:1:1101:6800:2414	Ambloplites rupestris	191	species	97	4		Ambloplites rupestris	109273	109273	species	Ambloplites rupestris	109272	genus	Ambloplites	8180	family	Centrarchidae	1489940	order	Centrarchiformes	186623	class	Actinopteri	7711	phylum	Chordata
C26T3:1:1103:16482:14543	Ambloplites rupestris	191	species	97	3		Ambloplites rupestris	109273	109273	species	Ambloplites rupestris	109272	genus	Ambloplites	8180	family	Centrarchidae	1489940	order	Centrarchiformes	186623	class	Actinopteri	7711	phylum	Chordata
C26T3:1:1104:10833:6071	Ambloplites rupestris	191	species	97.3333	3		Ambloplites rupestris	109273	109273	species	Ambloplites rupestris	109272	genus	Ambloplites	8180	family	Centrarchidae	1489940	order	Centrarchiformes	186623	class	Actinopteri	7711	phylum	Chordata
C26T3:1:1106:27383:7062	Ambloplites rupestris	191	species	97.3333	3		Ambloplites rupestris	109273	109273	species	Ambloplites rupestris	109272	genus	Ambloplites	8180	family	Centrarchidae	1489940	order	Centrarchiformes	186623	class	Actinopteri	7711	phylum	Chordata
C26T3:1:1107:13233:2638	Ambloplites rupestris	191	species	97.3333	4		Ambloplites rupestris	109273	109273	species	Ambloplites rupestris	109272	genus	Ambloplites	8180	family	Centrarchidae	1489940	order	Centrarchiformes	186623	class	Actinopteri	7711	phylum	Chordata
C26T3:1:1109:13656:5337	Ambloplites rupestris	191	species	99.3333	2		Ambloplites rupestris	109273	109273	species	Ambloplites rupestris	109272	genus	Ambloplites	8180	family	Centrarchidae	1489940	order	Centrarchiformes	186623	class	Actinopteri	7711	phylum	Chordata
C26T3:1:1112:5455:3966	Ambloplites rupestris	191	species	99.3333	4		Ambloplites rupestris	109273	109273	species	Ambloplites rupestris	109272	genus	Ambloplites	8180	family	Centrarchidae	1489940	order	Centrarchiformes	186623	class	Actinopteri	7711	phylum	Chordata
C26T3:1:1104:24138:3381	Ambloplites rupestris	189	species	99.3333	6		Ambloplites rupestris	109273	109273	species	Ambloplites rupestris	109272	genus	Ambloplites	8180	family	Centrarchidae	1489940	order	Centrarchiformes	186623	class	Actinopteri	7711	phylum	Chordata
C26T3:1:1105:16327:3280	Ambloplites rupestris	189	species	99.3333	6		Ambloplites rupestris	109273	109273	species	Ambloplites rupestris	109272	genus	Ambloplites	8180	family	Centrarchidae	1489940	order	Centrarchiformes	186623	class	Actinopteri	7711	phylum	Chordata
C26T3:1:2104:28419:10327	Ambloplites rupestris	189	species	100	2		Ambloplites rupestris	109273	109273	species	Ambloplites rupestris	109272	genus	Ambloplites	8180	family	Centrarchidae	1489940	order	Centrarchiformes	186623	class	Actinopteri	7711	phylum	Chordata
C26T3:1:1108:24984:21618	Ambloplites rupestris	182	species	99	8		Ambloplites rupestris	109273	109273	species	Ambloplites rupestris	109272	genus	Ambloplites	8180	family	Centrarchidae	1489940	order	Centrarchiformes	186623	class	Actinopteri	7711	phylum	Chordata
C26T3:1:1101:11420:2550	Ambloplites rupestris	180	species	99	123		Ambloplites rupestris	109273	109273	species	Ambloplites rupestris	109272	genus	Ambloplites	8180	family	Centrarchidae	1489940	order	Centrarchiformes	186623	class	Actinopteri	7711	phylum	Chordata
C26T3:1:1101:20513:9477	Ambloplites rupestris	180	species	97.3333	8		Ambloplites rupestris	109273	109273	species	Ambloplites rupestris	109272	genus	Ambloplites	8180	family	Centrarchidae	1489940	order	Centrarchiformes	186623	class	Actinopteri	7711	phylum	Chordata
C26T3:1:1105:17510:5706	Ambloplites rupestris	180	species	97.3333	13		Ambloplites rupestris	109273	109273	species	Ambloplites rupestris	109272	genus	Ambloplites	8180	family	Centrarchidae	1489940	order	Centrarchiformes	186623	class	Actinopteri	7711	phylum	Chordata
C26T3:1:1118:8224:15465	Ambloplites rupestris	180	species	99	4		Ambloplites rupestris	109273	109273	species	Ambloplites rupestris	109272	genus	Ambloplites	8180	family	Centrarchidae	1489940	order	Centrarchiformes	186623	class	Actinopteri	7711	phylum	Chordata
C26T3:1:2113:2759:18163	Ambloplites rupestris	180	species	97	2		Ambloplites rupestris	109273	109273	species	Ambloplites rupestris	109272	genus	Ambloplites	8180	family	Centrarchidae	1489940	order	Centrarchiformes	186623	class	Actinopteri	7711	phylum	Chordata
C26T3:1:2117:11272:2251	Ambloplites rupestris	180	species	99	3		Ambloplites rupestris	109273	109273	species	Ambloplites rupestris	109272	genus	Ambloplites	8180	family	Centrarchidae	1489940	order	Centrarchiformes	186623	class	Actinopteri	7711	phylum	Chordata
C26T3:1:1108:16030:24998	Ambloplites rupestris	178	species	98	10		Ambloplites rupestris	109273	109273	species	Ambloplites rupestris	109272	genus	Ambloplites	8180	family	Centrarchidae	1489940	order	Centrarchiformes	186623	class	Actinopteri	7711	phylum	Chordata
C26T3:1:1105:5512:8996	Ambloplites rupestris	171	species	98	10		Ambloplites rupestris	109273	109273	species	Ambloplites rupestris	109272	genus	Ambloplites	8180	family	Centrarchidae	1489940	order	Centrarchiformes	186623	class	Actinopteri	7711	phylum	Chordata
C26T3:1:1108:11585:11719	Ambloplites rupestris	171	species	98	72		Ambloplites rupestris	109273	109273	species	Ambloplites rupestris	109272	genus	Ambloplites	8180	family	Centrarchidae	1489940	order	Centrarchiformes	186623	class	Actinopteri	7711	phylum	Chordata
C26T3:1:1108:28403:7415	Ambloplites rupestris	171	species	98	19		Ambloplites rupestris	109273	109273	species	Ambloplites rupestris	109272	genus	Ambloplites	8180	family	Centrarchidae	1489940	order	Centrarchiformes	186623	class	Actinopteri	7711	phylum	Chordata
C26T3:1:1112:27267:20280	Ambloplites rupestris	171	species	98	2		Ambloplites rupestris	109273	109273	species	Ambloplites rupestris	109272	genus	Ambloplites	8180	family	Centrarchidae	1489940	order	Centrarchiformes	186623	class	Actinopteri	7711	phylum	Chordata
C26T3:1:1114:3983:9212	Ambloplites rupestris	171	species	98	2		Ambloplites rupestris	109273	109273	species	Ambloplites rupestris	109272	genus	Ambloplites	8180	family	Centrarchidae	1489940	order	Centrarchiformes	186623	class	Actinopteri	7711	phylum	Chordata
C26T3:1:2107:26862:12929	Ambloplites rupestris	171	species	99	3		Ambloplites rupestris	109273	109273	species	Ambloplites rupestris	109272	genus	Ambloplites	8180	family	Centrarchidae	1489940	order	Centrarchiformes	186623	class	Actinopteri	7711	phylum	Chordata
C26T3:1:2113:9982:7409	Ambloplites rupestris	171	species	98	11		Ambloplites rupestris	109273	109273	species	Ambloplites rupestris	109272	genus	Ambloplites	8180	family	Centrarchidae	1489940	order	Centrarchiformes	186623	class	Actinopteri	7711	phylum	Chordata
C26T3:1:1107:18191:12570	Ambloplites rupestris	169	species	99	1193		Ambloplites rupestris	109273	109273	species	Ambloplites rupestris	109272	genus	Ambloplites	8180	family	Centrarchidae	1489940	order	Centrarchiformes	186623	class	Actinopteri	7711	phylum	Chordata
C26T3:1:1111:22618:12834	Ambloplites rupestris	169	species	97.25	2		Ambloplites rupestris	109273	109273	species	Ambloplites rupestris	109272	genus	Ambloplites	8180	family	Centrarchidae	1489940	order	Centrarchiformes	186623	class	Actinopteri	7711	phylum	Chordata
C26T3:1:1119:5962:21912	Ambloplites rupestris	169	species	97	2		Ambloplites rupestris	109273	109273	species	Ambloplites rupestris	109272	genus	Ambloplites	8180	family	Centrarchidae	1489940	order	Centrarchiformes	186623	class	Actinopteri	7711	phylum	Chordata
C26T3:1:2106:18512:13256	Ambloplites rupestris	169	species	97	16		Ambloplites rupestris	109273	109273	species	Ambloplites rupestris	109272	genus	Ambloplites	8180	family	Centrarchidae	1489940	order	Centrarchiformes	186623	class	Actinopteri	7711	phylum	Chordata
C26T3:1:2106:22665:6362	Ambloplites rupestris	169	species	99	16		Ambloplites rupestris	109273	109273	species	Ambloplites rupestris	109272	genus	Ambloplites	8180	family	Centrarchidae	1489940	order	Centrarchiformes	186623	class	Actinopteri	7711	phylum	Chordata
C26T3:1:2106:27570:13083	Ambloplites rupestris	169	species	100	2		Ambloplites rupestris	109273	109273	species	Ambloplites rupestris	109272	genus	Ambloplites	8180	family	Centrarchidae	1489940	order	Centrarchiformes	186623	class	Actinopteri	7711	phylum	Chordata
C26T3:1:2112:15128:11874	Ambloplites rupestris	169	species	97	2		Ambloplites rupestris	109273	109273	species	Ambloplites rupestris	109272	genus	Ambloplites	8180	family	Centrarchidae	1489940	order	Centrarchiformes	186623	class	Actinopteri	7711	phylum	Chordata
C26T3:1:2116:26363:4994	Ambloplites rupestris	169	species	97	5		Ambloplites rupestris	109273	109273	species	Ambloplites rupestris	109272	genus	Ambloplites	8180	family	Centrarchidae	1489940	order	Centrarchiformes	186623	class	Actinopteri	7711	phylum	Chordata
C26T3:1:1102:8359:10353	Ambloplites rupestris	167	species	97	4		Ambloplites rupestris	109273	109273	species	Ambloplites rupestris	109272	genus	Ambloplites	8180	family	Centrarchidae	1489940	order	Centrarchiformes	186623	class	Actinopteri	7711	phylum	Chordata
C26T3:1:1101:12141:17908	Ambloplites rupestris	165	species	100	107		Ambloplites rupestris	109273	109273	species	Ambloplites rupestris	109272	genus	Ambloplites	8180	family	Centrarchidae	1489940	order	Centrarchiformes	186623	class	Actinopteri	7711	phylum	Chordata
C26T3:1:1101:13639:8917	Ambloplites rupestris	165	species	97	72		Ambloplites rupestris	109273	109273	species	Ambloplites rupestris	109272	genus	Ambloplites	8180	family	Centrarchidae	1489940	order	Centrarchiformes	186623	class	Actinopteri	7711	phylum	Chordata
C26T3:1:1105:16425:14894	Ambloplites rupestris	165	species	100	154		Ambloplites rupestris	109273	109273	species	Ambloplites rupestris	109272	genus	Ambloplites	8180	family	Centrarchidae	1489940	order	Centrarchiformes	186623	class	Actinopteri	7711	phylum	Chordata
C26T3:1:1105:24024:5620	Ambloplites rupestris	165	species	98	9		Ambloplites rupestris	109273	109273	species	Ambloplites rupestris	109272	genus	Ambloplites	8180	family	Centrarchidae	1489940	order	Centrarchiformes	186623	class	Actinopteri	7711	phylum	Chordata
C26T3:1:1116:23521:17075	Ambloplites rupestris	165	species	98	5		Ambloplites rupestris	109273	109273	species	Ambloplites rupestris	109272	genus	Ambloplites	8180	family	Centrarchidae	1489940	order	Centrarchiformes	186623	class	Actinopteri	7711	phylum	Chordata
C26T3:1:2102:27844:19494	Ambloplites rupestris	165	species	98	16		Ambloplites rupestris	109273	109273	species	Ambloplites rupestris	109272	genus	Ambloplites	8180	family	Centrarchidae	1489940	order	Centrarchiformes	186623	class	Actinopteri	7711	phylum	Chordata
C26T3:1:2107:25772:7037	Ambloplites rupestris	165	species	98	10		Ambloplites rupestris	109273	109273	species	Ambloplites rupestris	109272	genus	Ambloplites	8180	family	Centrarchidae	1489940	order	Centrarchiformes	186623	class	Actinopteri	7711	phylum	Chordata
C26T3:1:2111:7315:8542	Ambloplites rupestris	165	species	98	4		Ambloplites rupestris	109273	109273	species	Ambloplites rupestris	109272	genus	Ambloplites	8180	family	Centrarchidae	1489940	order	Centrarchiformes	186623	class	Actinopteri	7711	phylum	Chordata
C26T3:1:2113:20131:23941	Ambloplites rupestris	165	species	98	4		Ambloplites rupestris	109273	109273	species	Ambloplites rupestris	109272	genus	Ambloplites	8180	family	Centrarchidae	1489940	order	Centrarchiformes	186623	class	Actinopteri	7711	phylum	Chordata
C26T3:1:2113:9888:11606	Ambloplites rupestris	165	species	98	8		Ambloplites rupestris	109273	109273	species	Ambloplites rupestris	109272	genus	Ambloplites	8180	family	Centrarchidae	1489940	order	Centrarchiformes	186623	class	Actinopteri	7711	phylum	Chordata
C26T3:1:2115:12401:2672	Ambloplites rupestris	165	species	98	4		Ambloplites rupestris	109273	109273	species	Ambloplites rupestris	109272	genus	Ambloplites	8180	family	Centrarchidae	1489940	order	Centrarchiformes	186623	class	Actinopteri	7711	phylum	Chordata
C26T3:1:2117:25087:18429	Ambloplites rupestris	165	species	98	2		Ambloplites rupestris	109273	109273	species	Ambloplites rupestris	109272	genus	Ambloplites	8180	family	Centrarchidae	1489940	order	Centrarchiformes	186623	class	Actinopteri	7711	phylum	Chordata
C26T3:1:1103:16426:23848	Anaxyrus microscaphus	195	species	100	19		Anaxyrus microscaphus	30336	30336	species	Anaxyrus microscaphus	651670	genus	Anaxyrus	8382	family	Bufonidae	8342	order	Anura	8292	class	Amphibia	7711	phylum	Chordata
C26T3:1:1101:12947:24127	Anaxyrus microscaphus	193	species	99	29		Anaxyrus microscaphus	30336	30336	species	Anaxyrus microscaphus	651670	genus	Anaxyrus	8382	family	Bufonidae	8342	order	Anura	8292	class	Amphibia	7711	phylum	Chordata
C26T3:1:1102:24969:16325	Anaxyrus microscaphus	193	species	99	27		Anaxyrus microscaphus	30336	30336	species	Anaxyrus microscaphus	651670	genus	Anaxyrus	8382	family	Bufonidae	8342	order	Anura	8292	class	Amphibia	7711	phylum	Chordata
C26T3:1:1107:13849:13412	Anaxyrus microscaphus	193	species	99	13		Anaxyrus microscaphus	30336	30336	species	Anaxyrus microscaphus	651670	genus	Anaxyrus	8382	family	Bufonidae	8342	order	Anura	8292	class	Amphibia	7711	phylum	Chordata
C26T3:1:1107:19480:18837	Anaxyrus microscaphus	191	species	100	4		Anaxyrus microscaphus	30336	30336	species	Anaxyrus microscaphus	651670	genus	Anaxyrus	8382	family	Bufonidae	8342	order	Anura	8292	class	Amphibia	7711	phylum	Chordata
C26T3:1:1114:6625:16365	Anaxyrus microscaphus	191	species	99	8		Anaxyrus microscaphus	30336	30336	species	Anaxyrus microscaphus	651670	genus	Anaxyrus	8382	family	Bufonidae	8342	order	Anura	8292	class	Amphibia	7711	phylum	Chordata
C26T3:1:1103:7817:12438	Anaxyrus microscaphus	182	species	97	2		Anaxyrus microscaphus	30336	30336	species	Anaxyrus microscaphus	651670	genus	Anaxyrus	8382	family	Bufonidae	8342	order	Anura	8292	class	Amphibia	7711	phylum	Chordata
C26T3:1:2101:7891:13381	Anaxyrus microscaphus	180	species	98	2		Anaxyrus microscaphus	30336	30336	species	Anaxyrus microscaphus	651670	genus	Anaxyrus	8382	family	Bufonidae	8342	order	Anura	8292	class	Amphibia	7711	phylum	Chordata
C26T3:1:1103:15472:15620	Anaxyrus microscaphus	178	species	100	6		Anaxyrus microscaphus	30336	30336	species	Anaxyrus microscaphus	651670	genus	Anaxyrus	8382	family	Bufonidae	8342	order	Anura	8292	class	Amphibia	7711	phylum	Chordata
C26T3:1:1119:13684:22954	Anaxyrus microscaphus	178	species	100	2		Anaxyrus microscaphus	30336	30336	species	Anaxyrus microscaphus	651670	genus	Anaxyrus	8382	family	Bufonidae	8342	order	Anura	8292	class	Amphibia	7711	phylum	Chordata
C26T3:1:1102:22298:9777	Anaxyrus microscaphus	169	species	100	7		Anaxyrus microscaphus	30336	30336	species	Anaxyrus microscaphus	651670	genus	Anaxyrus	8382	family	Bufonidae	8342	order	Anura	8292	class	Amphibia	7711	phylum	Chordata
C26T3:1:1114:16566:8677	Anaxyrus microscaphus	169	species	100	6		Anaxyrus microscaphus	30336	30336	species	Anaxyrus microscaphus	651670	genus	Anaxyrus	8382	family	Bufonidae	8342	order	Anura	8292	class	Amphibia	7711	phylum	Chordata
C26T3:1:1103:3963:10765	Anaxyrus microscaphus	167	species	100	3053		Anaxyrus microscaphus	30336	30336	species	Anaxyrus microscaphus	651670	genus	Anaxyrus	8382	family	Bufonidae	8342	order	Anura	8292	class	Amphibia	7711	phylum	Chordata
C26T3:1:1116:16978:5243	Anaxyrus microscaphus	167	species	100	5		Anaxyrus microscaphus	30336	30336	species	Anaxyrus microscaphus	651670	genus	Anaxyrus	8382	family	Bufonidae	8342	order	Anura	8292	class	Amphibia	7711	phylum	Chordata
C26T3:1:1107:22865:16767	Anaxyrus microscaphus	165	species	100	3		Anaxyrus microscaphus	30336	30336	species	Anaxyrus microscaphus	651670	genus	Anaxyrus	8382	family	Bufonidae	8342	order	Anura	8292	class	Amphibia	7711	phylum	Chordata
C26T3:1:2103:20160:12362	Anaxyrus microscaphus	165	species	100	20		Anaxyrus microscaphus	30336	30336	species	Anaxyrus microscaphus	651670	genus	Anaxyrus	8382	family	Bufonidae	8342	order	Anura	8292	class	Amphibia	7711	phylum	Chordata
C26T3:1:1101:9494:11922	Anaxyrus woodhousii	193	species	98.9	9		Anaxyrus woodhousii	47561	47561	species	Anaxyrus woodhousii	651670	genus	Anaxyrus	8382	family	Bufonidae	8342	order	Anura	8292	class	Amphibia	7711	phylum	Chordata
C26T3:1:1107:5872:3469	Anaxyrus woodhousii	167	species	99.9	10		Anaxyrus woodhousii	47561	47561	species	Anaxyrus woodhousii	651670	genus	Anaxyrus	8382	family	Bufonidae	8342	order	Anura	8292	class	Amphibia	7711	phylum	Chordata
C26T3:1:1102:18670:9874	Ardea cinerea	182	species	100	3		Ardea cinerea	30390	30390	species	Ardea cinerea	30389	genus	Ardea	8899	family	Ardeidae	9205	order	Pelecaniformes	8782	class	Aves	7711	phylum	Chordata
C26T3:1:1106:12405:19709	Ardea cinerea	182	species	99	9		Ardea cinerea	30390	30390	species	Ardea cinerea	30389	genus	Ardea	8899	family	Ardeidae	9205	order	Pelecaniformes	8782	class	Aves	7711	phylum	Chordata
C26T3:1:1104:17367:18114	Bos taurus	231	species	98	2		Bos taurus	9913	9913	species	Bos taurus	9903	genus	Bos	9895	family	Bovidae	91561	order	Artiodactyla	40674	class	Mammalia	7711	phylum	Chordata
C26T3:1:1101:10955:10889	Bos taurus	213	species	99	2		Bos taurus	9913	9913	species	Bos taurus	9903	genus	Bos	9895	family	Bovidae	91561	order	Artiodactyla	40674	class	Mammalia	7711	phylum	Chordata
C26T3:1:1101:3851:18988	Bos taurus	213	species	99	34		Bos taurus	9913	9913	species	Bos taurus	9903	genus	Bos	9895	family	Bovidae	91561	order	Artiodactyla	40674	class	Mammalia	7711	phylum	Chordata
C26T3:1:1111:13794:24421	Bos taurus	213	species	99	2		Bos taurus	9913	9913	species	Bos taurus	9903	genus	Bos	9895	family	Bovidae	91561	order	Artiodactyla	40674	class	Mammalia	7711	phylum	Chordata
C26T3:1:1114:26354:10687	Bos taurus	213	species	99	5		Bos taurus	9913	9913	species	Bos taurus	9903	genus	Bos	9895	family	Bovidae	91561	order	Artiodactyla	40674	class	Mammalia	7711	phylum	Chordata
C26T3:1:2102:16994:8908	Bos taurus	213	species	99	2		Bos taurus	9913	9913	species	Bos taurus	9903	genus	Bos	9895	family	Bovidae	91561	order	Artiodactyla	40674	class	Mammalia	7711	phylum	Chordata
C26T3:1:1101:14434:18346	Bos taurus	211	species	99	226		Bos taurus	9913	9913	species	Bos taurus	9903	genus	Bos	9895	family	Bovidae	91561	order	Artiodactyla	40674	class	Mammalia	7711	phylum	Chordata
C26T3:1:1102:23972:22545	Bos taurus	211	species	99	46		Bos taurus	9913	9913	species	Bos taurus	9903	genus	Bos	9895	family	Bovidae	91561	order	Artiodactyla	40674	class	Mammalia	7711	phylum	Chordata
C26T3:1:1105:10066:5524	Bos taurus	211	species	99	3		Bos taurus	9913	9913	species	Bos taurus	9903	genus	Bos	9895	family	Bovidae	91561	order	Artiodactyla	40674	class	Mammalia	7711	phylum	Chordata
C26T3:1:1105:22796:9510	Bos taurus	211	species	99	6		Bos taurus	9913	9913	species	Bos taurus	9903	genus	Bos	9895	family	Bovidae	91561	order	Artiodactyla	40674	class	Mammalia	7711	phylum	Chordata
C26T3:1:1106:13692:8128	Bos taurus	211	species	100	11		Bos taurus	9913	9913	species	Bos taurus	9903	genus	Bos	9895	family	Bovidae	91561	order	Artiodactyla	40674	class	Mammalia	7711	phylum	Chordata
C26T3:1:1109:17003:10170	Bos taurus	211	species	99	2		Bos taurus	9913	9913	species	Bos taurus	9903	genus	Bos	9895	family	Bovidae	91561	order	Artiodactyla	40674	class	Mammalia	7711	phylum	Chordata
C26T3:1:1104:14694:21992	Bos taurus	206	species	100	15		Bos taurus	9913	9913	species	Bos taurus	9903	genus	Bos	9895	family	Bovidae	91561	order	Artiodactyla	40674	class	Mammalia	7711	phylum	Chordata
C26T3:1:1110:25403:11045	Bos taurus	206	species	97.0833	2		Bos taurus	9913	9913	species	Bos taurus	9903	genus	Bos	9895	family	Bovidae	91561	order	Artiodactyla	40674	class	Mammalia	7711	phylum	Chordata
C26T3:1:1119:13235:9673	Bos taurus	206	species	98	2		Bos taurus	9913	9913	species	Bos taurus	9903	genus	Bos	9895	family	Bovidae	91561	order	Artiodactyla	40674	class	Mammalia	7711	phylum	Chordata
C26T3:1:2101:20688:8099	Bos taurus	206	species	98	4		Bos taurus	9913	9913	species	Bos taurus	9903	genus	Bos	9895	family	Bovidae	91561	order	Artiodactyla	40674	class	Mammalia	7711	phylum	Chordata
C26T3:1:1103:6606:15331	Bos taurus	204	species	99.9167	5		Bos taurus	9913	9913	species	Bos taurus	9903	genus	Bos	9895	family	Bovidae	91561	order	Artiodactyla	40674	class	Mammalia	7711	phylum	Chordata
C26T3:1:2115:24814:22921	Bos taurus	204	species	100	2		Bos taurus	9913	9913	species	Bos taurus	9903	genus	Bos	9895	family	Bovidae	91561	order	Artiodactyla	40674	class	Mammalia	7711	phylum	Chordata
C26T3:1:2105:24347:2528	Bos taurus	202	species	98	2		Bos taurus	9913	9913	species	Bos taurus	9903	genus	Bos	9895	family	Bovidae	91561	order	Artiodactyla	40674	class	Mammalia	7711	phylum	Chordata
C26T3:1:1116:25776:7066	Bos taurus	200	species	97	2		Bos taurus	9913	9913	species	Bos taurus	9903	genus	Bos	9895	family	Bovidae	91561	order	Artiodactyla	40674	class	Mammalia	7711	phylum	Chordata
C26T3:1:1109:14862:1444	Bos taurus	198	species	97	6		Bos taurus	9913	9913	species	Bos taurus	9903	genus	Bos	9895	family	Bovidae	91561	order	Artiodactyla	40674	class	Mammalia	7711	phylum	Chordata
C26T3:1:1101:10700:22464	Bos taurus	195	species	100	193		Bos taurus	9913	9913	species	Bos taurus	9903	genus	Bos	9895	family	Bovidae	91561	order	Artiodactyla	40674	class	Mammalia	7711	phylum	Chordata
C26T3:1:1109:11374:25008	Bos taurus	187	species	100	17		Bos taurus	9913	9913	species	Bos taurus	9903	genus	Bos	9895	family	Bovidae	91561	order	Artiodactyla	40674	class	Mammalia	7711	phylum	Chordata
C26T3:1:1118:17739:24973	Bos taurus	185	species	99	3		Bos taurus	9913	9913	species	Bos taurus	9903	genus	Bos	9895	family	Bovidae	91561	order	Artiodactyla	40674	class	Mammalia	7711	phylum	Chordata
C26T3:1:2118:21411:19464	Bos taurus	185	species	99	2		Bos taurus	9913	9913	species	Bos taurus	9903	genus	Bos	9895	family	Bovidae	91561	order	Artiodactyla	40674	class	Mammalia	7711	phylum	Chordata
C26T3:1:1101:22891:14391	Bos taurus	180	species	99	137		Bos taurus	9913	9913	species	Bos taurus	9903	genus	Bos	9895	family	Bovidae	91561	order	Artiodactyla	40674	class	Mammalia	7711	phylum	Chordata
C26T3:1:1106:18810:22676	Bos taurus	178	species	98.0417	2		Bos taurus	9913	9913	species	Bos taurus	9903	genus	Bos	9895	family	Bovidae	91561	order	Artiodactyla	40674	class	Mammalia	7711	phylum	Chordata
C26T3:1:1101:10414:15023	Bos taurus	176	species	99	241		Bos taurus	9913	9913	species	Bos taurus	9903	genus	Bos	9895	family	Bovidae	91561	order	Artiodactyla	40674	class	Mammalia	7711	phylum	Chordata
C26T3:1:1116:16781:14313	Bos taurus	176	species	99	5		Bos taurus	9913	9913	species	Bos taurus	9903	genus	Bos	9895	family	Bovidae	91561	order	Artiodactyla	40674	class	Mammalia	7711	phylum	Chordata
C26T3:1:1107:14384:2061	Bos taurus	174	species	98	7		Bos taurus	9913	9913	species	Bos taurus	9903	genus	Bos	9895	family	Bovidae	91561	order	Artiodactyla	40674	class	Mammalia	7711	phylum	Chordata
C26T3:1:1108:21637:23821	Bos taurus	174	species	98	4		Bos taurus	9913	9913	species	Bos taurus	9903	genus	Bos	9895	family	Bovidae	91561	order	Artiodactyla	40674	class	Mammalia	7711	phylum	Chordata
C26T3:1:1118:20387:24833	Bos taurus	169	species	100	5		Bos taurus	9913	9913	species	Bos taurus	9903	genus	Bos	9895	family	Bovidae	91561	order	Artiodactyla	40674	class	Mammalia	7711	phylum	Chordata
C26T3:1:1101:23026:21781	Bos taurus	167	species	98.0417	122		Bos taurus	9913	9913	species	Bos taurus	9903	genus	Bos	9895	family	Bovidae	91561	order	Artiodactyla	40674	class	Mammalia	7711	phylum	Chordata
C26T3:1:1105:17111:14824	Bos taurus	165	species	99	11		Bos taurus	9913	9913	species	Bos taurus	9903	genus	Bos	9895	family	Bovidae	91561	order	Artiodactyla	40674	class	Mammalia	7711	phylum	Chordata
C26T3:1:2105:2984:16524	Bos taurus	165	species	98.0417	2		Bos taurus	9913	9913	species	Bos taurus	9903	genus	Bos	9895	family	Bovidae	91561	order	Artiodactyla	40674	class	Mammalia	7711	phylum	Chordata
C26T3:1:2108:16393:7322	Callonetta leucophrys	182	species	97	3		Callonetta leucophrys	75871	75871	species	Callonetta leucophrys	75870	genus	Callonetta	8830	family	Anatidae	8826	order	Anseriformes	8782	class	Aves	7711	phylum	Chordata
C26T3:1:1105:22067:10599	Canis lupus	209	species	99	4		Canis lupus	9612	9612	species	Canis lupus	9611	genus	Canis	9608	family	Canidae	33554	order	Carnivora	40674	class	Mammalia	7711	phylum	Chordata
C26T3:1:1113:12804:8142	Canis lupus	191	species	100	5		Canis lupus	9612	9612	species	Canis lupus	9611	genus	Canis	9608	family	Canidae	33554	order	Carnivora	40674	class	Mammalia	7711	phylum	Chordata
C26T3:1:1104:11303:19710	Canis lupus	174	species	99	20		Canis lupus	9612	9612	species	Canis lupus	9611	genus	Canis	9608	family	Canidae	33554	order	Carnivora	40674	class	Mammalia	7711	phylum	Chordata
C26T3:1:2105:8828:18824	Castor canadensis	239	species	99	2		Castor canadensis	51338	51338	species	Castor canadensis	10184	genus	Castor	29132	family	Castoridae	9989	order	Rodentia	40674	class	Mammalia	7711	phylum	Chordata
C26T3:1:1102:29404:11409	Castor canadensis	213	species	99	7		Castor canadensis	51338	51338	species	Castor canadensis	10184	genus	Castor	29132	family	Castoridae	9989	order	Rodentia	40674	class	Mammalia	7711	phylum	Chordata
C26T3:1:1106:27433:11561	Castor canadensis	213	species	99	33		Castor canadensis	51338	51338	species	Castor canadensis	10184	genus	Castor	29132	family	Castoridae	9989	order	Rodentia	40674	class	Mammalia	7711	phylum	Chordata
C26T3:1:2102:12001:24684	Castor canadensis	207	species	98	3		Castor canadensis	51338	51338	species	Castor canadensis	10184	genus	Castor	29132	family	Castoridae	9989	order	Rodentia	40674	class	Mammalia	7711	phylum	Chordata
C26T3:1:1116:8608:13850	Castor canadensis	204	species	98	2		Castor canadensis	51338	51338	species	Castor canadensis	10184	genus	Castor	29132	family	Castoridae	9989	order	Rodentia	40674	class	Mammalia	7711	phylum	Chordata
C26T3:1:1102:18398:14353	Castor canadensis	202	species	97	4		Castor canadensis	51338	51338	species	Castor canadensis	10184	genus	Castor	29132	family	Castoridae	9989	order	Rodentia	40674	class	Mammalia	7711	phylum	Chordata
C26T3:1:1101:3743:15931	Castor canadensis	196	species	100	34		Castor canadensis	51338	51338	species	Castor canadensis	10184	genus	Castor	29132	family	Castoridae	9989	order	Rodentia	40674	class	Mammalia	7711	phylum	Chordata
C26T3:1:1103:20103:3184	Castor canadensis	191	species	100	4		Castor canadensis	51338	51338	species	Castor canadensis	10184	genus	Castor	29132	family	Castoridae	9989	order	Rodentia	40674	class	Mammalia	7711	phylum	Chordata
C26T3:1:1101:22178:13525	Castor canadensis	182	species	99	38		Castor canadensis	51338	51338	species	Castor canadensis	10184	genus	Castor	29132	family	Castoridae	9989	order	Rodentia	40674	class	Mammalia	7711	phylum	Chordata
C26T3:1:1101:12173:6392	Castor canadensis	180	species	99	185		Castor canadensis	51338	51338	species	Castor canadensis	10184	genus	Castor	29132	family	Castoridae	9989	order	Rodentia	40674	class	Mammalia	7711	phylum	Chordata
C26T3:1:1103:4559:5959	Castor canadensis	167	species	97	14		Castor canadensis	51338	51338	species	Castor canadensis	10184	genus	Castor	29132	family	Castoridae	9989	order	Rodentia	40674	class	Mammalia	7711	phylum	Chordata
C26T3:1:2109:12314:16495	Castor canadensis	167	species	99	2		Castor canadensis	51338	51338	species	Castor canadensis	10184	genus	Castor	29132	family	Castoridae	9989	order	Rodentia	40674	class	Mammalia	7711	phylum	Chordata
C26T3:1:1104:2877:13658	Castor canadensis	165	species	100	3		Castor canadensis	51338	51338	species	Castor canadensis	10184	genus	Castor	29132	family	Castoridae	9989	order	Rodentia	40674	class	Mammalia	7711	phylum	Chordata
C26T3:1:1106:18785:16657	Catostomus commersonii	171	species	99.75	2		Catostomus commersonii	7971	7971	species	Catostomus commersonii	7969	genus	Catostomus	7968	family	Catostomidae	7952	order	Cypriniformes	186623	class	Actinopteri	7711	phylum	Chordata
C26T3:1:1112:12499:1146	Catostomus commersonii	171	species	99.75	17		Catostomus commersonii	7971	7971	species	Catostomus commersonii	7969	genus	Catostomus	7968	family	Catostomidae	7952	order	Cypriniformes	186623	class	Actinopteri	7711	phylum	Chordata
C26T3:1:1102:23095:9896	Catostomus commersonii	169	species	98.75	5		Catostomus commersonii	7971	7971	species	Catostomus commersonii	7969	genus	Catostomus	7968	family	Catostomidae	7952	order	Cypriniformes	186623	class	Actinopteri	7711	phylum	Chordata
C26T3:1:1104:21049:14850	Catostomus commersonii	169	species	98.8889	15		Catostomus commersonii	7971	7971	species	Catostomus commersonii	7969	genus	Catostomus	7968	family	Catostomidae	7952	order	Cypriniformes	186623	class	Actinopteri	7711	phylum	Chordata
C26T3:1:1111:16296:1557	Catostomus commersonii	169	species	98	2		Catostomus commersonii	7971	7971	species	Catostomus commersonii	7969	genus	Catostomus	7968	family	Catostomidae	7952	order	Cypriniformes	186623	class	Actinopteri	7711	phylum	Chordata
C26T3:1:1117:21441:23925	Catostomus commersonii	169	species	98.8889	2		Catostomus commersonii	7971	7971	species	Catostomus commersonii	7969	genus	Catostomus	7968	family	Catostomidae	7952	order	Cypriniformes	186623	class	Actinopteri	7711	phylum	Chordata
C26T3:1:1119:19852:1699	Catostomus commersonii	169	species	98.75	58		Catostomus commersonii	7971	7971	species	Catostomus commersonii	7969	genus	Catostomus	7968	family	Catostomidae	7952	order	Cypriniformes	186623	class	Actinopteri	7711	phylum	Chordata
C26T3:1:1108:28843:17439	Catostomus commersonii	167	species	98.75	45		Catostomus commersonii	7971	7971	species	Catostomus commersonii	7969	genus	Catostomus	7968	family	Catostomidae	7952	order	Cypriniformes	186623	class	Actinopteri	7711	phylum	Chordata
C26T3:1:1118:9596:11145	Catostomus commersonii	165	species	99.75	3		Catostomus commersonii	7971	7971	species	Catostomus commersonii	7969	genus	Catostomus	7968	family	Catostomidae	7952	order	Cypriniformes	186623	class	Actinopteri	7711	phylum	Chordata
C26T3:1:1101:6823:18258	Centrocercus minimus	171	species	98	30		Centrocercus minimus	211967	211967	species	Centrocercus minimus	9001	genus	Centrocercus	9005	family	Phasianidae	8976	order	Galliformes	8782	class	Aves	7711	phylum	Chordata
C26T3:1:1106:13233:19884	Centrocercus urophasianus	180	species	99	12		Centrocercus urophasianus	9002	9002	species	Centrocercus urophasianus	9001	genus	Centrocercus	9005	family	Phasianidae	8976	order	Galliformes	8782	class	Aves	7711	phylum	Chordata
C26T3:1:1101:9154:16242	Centrocercus urophasianus	169	species	97	23		Centrocercus urophasianus	9002	9002	species	Centrocercus urophasianus	9001	genus	Centrocercus	9005	family	Phasianidae	8976	order	Galliformes	8782	class	Aves	7711	phylum	Chordata
C26T3:1:1101:16032:19253	Centrocercus urophasianus	165	species	100	57		Centrocercus urophasianus	9002	9002	species	Centrocercus urophasianus	9001	genus	Centrocercus	9005	family	Phasianidae	8976	order	Galliformes	8782	class	Aves	7711	phylum	Chordata
C26T3:1:1101:5645:10305	Chelydra serpentina	180	species	99	5		Chelydra serpentina	8475	8475	species	Chelydra serpentina	8474	genus	Chelydra	8473	family	Chelydridae	8459	order	Testudines	7711	phylum	Chordata
C26T3:1:1105:17643:3963	Chelydra serpentina	174	species	98	7		Chelydra serpentina	8475	8475	species	Chelydra serpentina	8474	genus	Chelydra	8473	family	Chelydridae	8459	order	Testudines	7711	phylum	Chordata
C26T3:1:1106:20448:22373	Condylura cristata	211	species	100	4		Condylura cristata	143302	143302	species	Condylura cristata	143301	genus	Condylura	9373	family	Talpidae	9362	order	Eulipotyphla	40674	class	Mammalia	7711	phylum	Chordata
C26T3:1:1108:22949:18543	Condylura cristata	204	species	98	2		Condylura cristata	143302	143302	species	Condylura cristata	143301	genus	Condylura	9373	family	Talpidae	9362	order	Eulipotyphla	40674	class	Mammalia	7711	phylum	Chordata
C26T3:1:1116:6516:18062	Condylura cristata	204	species	98	3		Condylura cristata	143302	143302	species	Condylura cristata	143301	genus	Condylura	9373	family	Talpidae	9362	order	Eulipotyphla	40674	class	Mammalia	7711	phylum	Chordata
C26T3:1:1109:18553:23824	Condylura cristata	191	species	100	9		Condylura cristata	143302	143302	species	Condylura cristata	143301	genus	Condylura	9373	family	Talpidae	9362	order	Eulipotyphla	40674	class	Mammalia	7711	phylum	Chordata
C26T3:1:1119:8098:11715	Condylura cristata	180	species	99	4		Condylura cristata	143302	143302	species	Condylura cristata	143301	genus	Condylura	9373	family	Talpidae	9362	order	Eulipotyphla	40674	class	Mammalia	7711	phylum	Chordata
C26T3:1:1102:17509:11008	Condylura cristata	171	species	98	3		Condylura cristata	143302	143302	species	Condylura cristata	143301	genus	Condylura	9373	family	Talpidae	9362	order	Eulipotyphla	40674	class	Mammalia	7711	phylum	Chordata
C26T3:1:1103:2118:13229	Condylura cristata	169	species	98	9		Condylura cristata	143302	143302	species	Condylura cristata	143301	genus	Condylura	9373	family	Talpidae	9362	order	Eulipotyphla	40674	class	Mammalia	7711	phylum	Chordata
C26T3:1:1106:26647:18698	Condylura cristata	165	species	97	2		Condylura cristata	143302	143302	species	Condylura cristata	143301	genus	Condylura	9373	family	Talpidae	9362	order	Eulipotyphla	40674	class	Mammalia	7711	phylum	Chordata
C26T3:1:2104:18412:2024	Coreoperca loona	167	species	97	2		Coreoperca loona	1002181	1002181	species	Coreoperca loona	215344	genus	Coreoperca	119486	family	Sinipercidae	1489940	order	Centrarchiformes	186623	class	Actinopteri	7711	phylum	Chordata
C26T3:1:2103:23451:12985	Culaea inconstans	195	species	97	2		Culaea inconstans	240156	240156	species	Culaea inconstans	240155	genus	Culaea	69291	family	Gasterosteidae	8111	order	Perciformes	186623	class	Actinopteri	7711	phylum	Chordata
C26T3:1:2101:11340:24586	Culaea inconstans	191	species	97	3		Culaea inconstans	240156	240156	species	Culaea inconstans	240155	genus	Culaea	69291	family	Gasterosteidae	8111	order	Perciformes	186623	class	Actinopteri	7711	phylum	Chordata
C26T3:1:1109:11770:11080	Culaea inconstans	176	species	97	2		Culaea inconstans	240156	240156	species	Culaea inconstans	240155	genus	Culaea	69291	family	Gasterosteidae	8111	order	Perciformes	186623	class	Actinopteri	7711	phylum	Chordata
C26T3:1:1106:26846:11134	Culaea inconstans	169	species	99	13		Culaea inconstans	240156	240156	species	Culaea inconstans	240155	genus	Culaea	69291	family	Gasterosteidae	8111	order	Perciformes	186623	class	Actinopteri	7711	phylum	Chordata
C26T3:1:1102:27115:10923	Culaea inconstans	167	species	97	73		Culaea inconstans	240156	240156	species	Culaea inconstans	240155	genus	Culaea	69291	family	Gasterosteidae	8111	order	Perciformes	186623	class	Actinopteri	7711	phylum	Chordata
C26T3:1:1103:21200:22827	Culaea inconstans	167	species	97	4		Culaea inconstans	240156	240156	species	Culaea inconstans	240155	genus	Culaea	69291	family	Gasterosteidae	8111	order	Perciformes	186623	class	Actinopteri	7711	phylum	Chordata
C26T3:1:1103:27442:17745	Culaea inconstans	167	species	97	5		Culaea inconstans	240156	240156	species	Culaea inconstans	240155	genus	Culaea	69291	family	Gasterosteidae	8111	order	Perciformes	186623	class	Actinopteri	7711	phylum	Chordata
C26T3:1:1104:23506:8199	Culaea inconstans	167	species	97	3		Culaea inconstans	240156	240156	species	Culaea inconstans	240155	genus	Culaea	69291	family	Gasterosteidae	8111	order	Perciformes	186623	class	Actinopteri	7711	phylum	Chordata
C26T3:1:1107:12281:12900	Culaea inconstans	167	species	97	8		Culaea inconstans	240156	240156	species	Culaea inconstans	240155	genus	Culaea	69291	family	Gasterosteidae	8111	order	Perciformes	186623	class	Actinopteri	7711	phylum	Chordata
C26T3:1:1105:9243:18339	Cygnus melancoryphus	171	species	97	9		Cygnus melancoryphus	41691	41691	species	Cygnus melancoryphus	8867	genus	Cygnus	8830	family	Anatidae	8826	order	Anseriformes	8782	class	Aves	7711	phylum	Chordata
C26T3:1:1107:23651:13183	Cyprinella spiloptera	187	species	99	2		Cyprinella spiloptera	13477	13477	species	Cyprinella spiloptera	13476	genus	Cyprinella	7953	family	Cyprinidae	7952	order	Cypriniformes	186623	class	Actinopteri	7711	phylum	Chordata
C26T3:1:1111:18509:19970	Cyprinella spiloptera	187	species	99	4		Cyprinella spiloptera	13477	13477	species	Cyprinella spiloptera	13476	genus	Cyprinella	7953	family	Cyprinidae	7952	order	Cypriniformes	186623	class	Actinopteri	7711	phylum	Chordata
C26T3:1:1101:21884:10226	Cyprinella spiloptera	178	species	97	7		Cyprinella spiloptera	13477	13477	species	Cyprinella spiloptera	13476	genus	Cyprinella	7953	family	Cyprinidae	7952	order	Cypriniformes	186623	class	Actinopteri	7711	phylum	Chordata
C26T3:1:1115:10422:16335	Cyprinella spiloptera	178	species	98	2		Cyprinella spiloptera	13477	13477	species	Cyprinella spiloptera	13476	genus	Cyprinella	7953	family	Cyprinidae	7952	order	Cypriniformes	186623	class	Actinopteri	7711	phylum	Chordata
C26T3:1:1101:27521:12097	Cyprinella spiloptera	174	species	100	64		Cyprinella spiloptera	13477	13477	species	Cyprinella spiloptera	13476	genus	Cyprinella	7953	family	Cyprinidae	7952	order	Cypriniformes	186623	class	Actinopteri	7711	phylum	Chordata
C26T3:1:1102:11412:9091	Cyprinella spiloptera	174	species	99	9		Cyprinella spiloptera	13477	13477	species	Cyprinella spiloptera	13476	genus	Cyprinella	7953	family	Cyprinidae	7952	order	Cypriniformes	186623	class	Actinopteri	7711	phylum	Chordata
C26T3:1:2105:24445:14607	Cyprinella spiloptera	172	species	98	4		Cyprinella spiloptera	13477	13477	species	Cyprinella spiloptera	13476	genus	Cyprinella	7953	family	Cyprinidae	7952	order	Cypriniformes	186623	class	Actinopteri	7711	phylum	Chordata
C26T3:1:1101:13622:1443	Cyprinella spiloptera	171	species	100	12		Cyprinella spiloptera	13477	13477	species	Cyprinella spiloptera	13476	genus	Cyprinella	7953	family	Cyprinidae	7952	order	Cypriniformes	186623	class	Actinopteri	7711	phylum	Chordata
C26T3:1:1103:21546:22246	Cyprinella spiloptera	171	species	100	25		Cyprinella spiloptera	13477	13477	species	Cyprinella spiloptera	13476	genus	Cyprinella	7953	family	Cyprinidae	7952	order	Cypriniformes	186623	class	Actinopteri	7711	phylum	Chordata
C26T3:1:1105:10430:17665	Cyprinella spiloptera	171	species	100	4		Cyprinella spiloptera	13477	13477	species	Cyprinella spiloptera	13476	genus	Cyprinella	7953	family	Cyprinidae	7952	order	Cypriniformes	186623	class	Actinopteri	7711	phylum	Chordata
C26T3:1:1102:24822:13454	Cyprinella spiloptera	167	species	97	4		Cyprinella spiloptera	13477	13477	species	Cyprinella spiloptera	13476	genus	Cyprinella	7953	family	Cyprinidae	7952	order	Cypriniformes	186623	class	Actinopteri	7711	phylum	Chordata
C26T3:1:1101:12981:20145	Cyprinella spiloptera	165	species	100	99		Cyprinella spiloptera	13477	13477	species	Cyprinella spiloptera	13476	genus	Cyprinella	7953	family	Cyprinidae	7952	order	Cypriniformes	186623	class	Actinopteri	7711	phylum	Chordata
C26T3:1:1110:11551:18707	Cyprinella spiloptera	165	species	100	2		Cyprinella spiloptera	13477	13477	species	Cyprinella spiloptera	13476	genus	Cyprinella	7953	family	Cyprinidae	7952	order	Cypriniformes	186623	class	Actinopteri	7711	phylum	Chordata
C26T3:1:1114:2609:16475	Dionda episcopa	171	species	97	5		Dionda episcopa	364070	364070	species	Dionda episcopa	232985	genus	Dionda	7953	family	Cyprinidae	7952	order	Cypriniformes	186623	class	Actinopteri	7711	phylum	Chordata
C26T3:1:1113:21150:10661	Esox lucius	178	species	98.875	2		Esox lucius	8010	8010	species	Esox lucius	8009	genus	Esox	8008	family	Esocidae	8007	order	Esociformes	186623	class	Actinopteri	7711	phylum	Chordata
C26T3:1:1103:15979:4090	Esox lucius	171	species	97.875	2		Esox lucius	8010	8010	species	Esox lucius	8009	genus	Esox	8008	family	Esocidae	8007	order	Esociformes	186623	class	Actinopteri	7711	phylum	Chordata
C26T3:1:1103:7397:3912	Esox lucius	169	species	99.875	20		Esox lucius	8010	8010	species	Esox lucius	8009	genus	Esox	8008	family	Esocidae	8007	order	Esociformes	186623	class	Actinopteri	7711	phylum	Chordata
C26T3:1:1101:15893:14824	Esox lucius	167	species	97.875	26		Esox lucius	8010	8010	species	Esox lucius	8009	genus	Esox	8008	family	Esocidae	8007	order	Esociformes	186623	class	Actinopteri	7711	phylum	Chordata
C26T3:1:1111:8215:11264	Esox lucius	165	species	99.875	5		Esox lucius	8010	8010	species	Esox lucius	8009	genus	Esox	8008	family	Esocidae	8007	order	Esociformes	186623	class	Actinopteri	7711	phylum	Chordata
C26T3:1:1102:26434:21023	Etheostoma flabellare	202	species	99	10		Etheostoma flabellare	54330	54330	species	Etheostoma flabellare	54318	genus	Etheostoma	8165	family	Percidae	8111	order	Perciformes	186623	class	Actinopteri	7711	phylum	Chordata
C26T3:1:1105:25165:15716	Etheostoma flabellare	200	species	99	2		Etheostoma flabellare	54330	54330	species	Etheostoma flabellare	54318	genus	Etheostoma	8165	family	Percidae	8111	order	Perciformes	186623	class	Actinopteri	7711	phylum	Chordata
C26T3:1:1102:2791:13527	Etheostoma flabellare	198	species	98	6		Etheostoma flabellare	54330	54330	species	Etheostoma flabellare	54318	genus	Etheostoma	8165	family	Percidae	8111	order	Perciformes	186623	class	Actinopteri	7711	phylum	Chordata
C26T3:1:1102:21587:18939	Etheostoma flabellare	196	species	98	13		Etheostoma flabellare	54330	54330	species	Etheostoma flabellare	54318	genus	Etheostoma	8165	family	Percidae	8111	order	Perciformes	186623	class	Actinopteri	7711	phylum	Chordata
C26T3:1:1103:18477:17425	Etheostoma flabellare	196	species	98	4		Etheostoma flabellare	54330	54330	species	Etheostoma flabellare	54318	genus	Etheostoma	8165	family	Percidae	8111	order	Perciformes	186623	class	Actinopteri	7711	phylum	Chordata
C26T3:1:1118:26810:18815	Etheostoma flabellare	196	species	98	2		Etheostoma flabellare	54330	54330	species	Etheostoma flabellare	54318	genus	Etheostoma	8165	family	Percidae	8111	order	Perciformes	186623	class	Actinopteri	7711	phylum	Chordata
C26T3:1:1101:13322:15502	Etheostoma flabellare	195	species	98	5		Etheostoma flabellare	54330	54330	species	Etheostoma flabellare	54318	genus	Etheostoma	8165	family	Percidae	8111	order	Perciformes	186623	class	Actinopteri	7711	phylum	Chordata
C26T3:1:1101:4187:15385	Etheostoma flabellare	193	species	99	9		Etheostoma flabellare	54330	54330	species	Etheostoma flabellare	54318	genus	Etheostoma	8165	family	Percidae	8111	order	Perciformes	186623	class	Actinopteri	7711	phylum	Chordata
C26T3:1:1106:4915:7269	Etheostoma flabellare	193	species	97	9		Etheostoma flabellare	54330	54330	species	Etheostoma flabellare	54318	genus	Etheostoma	8165	family	Percidae	8111	order	Perciformes	186623	class	Actinopteri	7711	phylum	Chordata
C26T3:1:1102:15138:1454	Etheostoma flabellare	191	species	97	7		Etheostoma flabellare	54330	54330	species	Etheostoma flabellare	54318	genus	Etheostoma	8165	family	Percidae	8111	order	Perciformes	186623	class	Actinopteri	7711	phylum	Chordata
C26T3:1:1107:14448:13579	Etheostoma flabellare	191	species	97	4		Etheostoma flabellare	54330	54330	species	Etheostoma flabellare	54318	genus	Etheostoma	8165	family	Percidae	8111	order	Perciformes	186623	class	Actinopteri	7711	phylum	Chordata
C26T3:1:1114:2552:8552	Etheostoma flabellare	191	species	97	2		Etheostoma flabellare	54330	54330	species	Etheostoma flabellare	54318	genus	Etheostoma	8165	family	Percidae	8111	order	Perciformes	186623	class	Actinopteri	7711	phylum	Chordata
C26T3:1:1104:25603:8395	Etheostoma flabellare	189	species	99	5		Etheostoma flabellare	54330	54330	species	Etheostoma flabellare	54318	genus	Etheostoma	8165	family	Percidae	8111	order	Perciformes	186623	class	Actinopteri	7711	phylum	Chordata
C26T3:1:2106:7219:3372	Etheostoma flabellare	187	species	98	2		Etheostoma flabellare	54330	54330	species	Etheostoma flabellare	54318	genus	Etheostoma	8165	family	Percidae	8111	order	Perciformes	186623	class	Actinopteri	7711	phylum	Chordata
C26T3:1:1101:2480:17640	Etheostoma flabellare	185	species	97	4		Etheostoma flabellare	54330	54330	species	Etheostoma flabellare	54318	genus	Etheostoma	8165	family	Percidae	8111	order	Perciformes	186623	class	Actinopteri	7711	phylum	Chordata
C26T3:1:1109:5549:4876	Etheostoma flabellare	182	species	99	2		Etheostoma flabellare	54330	54330	species	Etheostoma flabellare	54318	genus	Etheostoma	8165	family	Percidae	8111	order	Perciformes	186623	class	Actinopteri	7711	phylum	Chordata
C26T3:1:1101:5578:13318	Etheostoma flabellare	178	species	98	5		Etheostoma flabellare	54330	54330	species	Etheostoma flabellare	54318	genus	Etheostoma	8165	family	Percidae	8111	order	Perciformes	186623	class	Actinopteri	7711	phylum	Chordata
C26T3:1:1102:23937:10089	Etheostoma flabellare	178	species	100	404		Etheostoma flabellare	54330	54330	species	Etheostoma flabellare	54318	genus	Etheostoma	8165	family	Percidae	8111	order	Perciformes	186623	class	Actinopteri	7711	phylum	Chordata
C26T3:1:1103:18585:11182	Etheostoma flabellare	178	species	99	5		Etheostoma flabellare	54330	54330	species	Etheostoma flabellare	54318	genus	Etheostoma	8165	family	Percidae	8111	order	Perciformes	186623	class	Actinopteri	7711	phylum	Chordata
C26T3:1:1113:9169:15820	Etheostoma flabellare	178	species	97	3		Etheostoma flabellare	54330	54330	species	Etheostoma flabellare	54318	genus	Etheostoma	8165	family	Percidae	8111	order	Perciformes	186623	class	Actinopteri	7711	phylum	Chordata
C26T3:1:2101:9081:11045	Etheostoma flabellare	178	species	97	2		Etheostoma flabellare	54330	54330	species	Etheostoma flabellare	54318	genus	Etheostoma	8165	family	Percidae	8111	order	Perciformes	186623	class	Actinopteri	7711	phylum	Chordata
C26T3:1:1104:8313:22941	Etheostoma flabellare	176	species	97	2		Etheostoma flabellare	54330	54330	species	Etheostoma flabellare	54318	genus	Etheostoma	8165	family	Percidae	8111	order	Perciformes	186623	class	Actinopteri	7711	phylum	Chordata
C26T3:1:1111:3678:9153	Etheostoma flabellare	176	species	98	2		Etheostoma flabellare	54330	54330	species	Etheostoma flabellare	54318	genus	Etheostoma	8165	family	Percidae	8111	order	Perciformes	186623	class	Actinopteri	7711	phylum	Chordata
C26T3:1:2109:16865:1969	Etheostoma flabellare	176	species	97	7		Etheostoma flabellare	54330	54330	species	Etheostoma flabellare	54318	genus	Etheostoma	8165	family	Percidae	8111	order	Perciformes	186623	class	Actinopteri	7711	phylum	Chordata
C26T3:1:1108:23885:5656	Etheostoma flabellare	174	species	100	9		Etheostoma flabellare	54330	54330	species	Etheostoma flabellare	54318	genus	Etheostoma	8165	family	Percidae	8111	order	Perciformes	186623	class	Actinopteri	7711	phylum	Chordata
C26T3:1:1108:5588:18057	Etheostoma flabellare	174	species	100	3		Etheostoma flabellare	54330	54330	species	Etheostoma flabellare	54318	genus	Etheostoma	8165	family	Percidae	8111	order	Perciformes	186623	class	Actinopteri	7711	phylum	Chordata
C26T3:1:2106:20810:16522	Etheostoma flabellare	174	species	100	4		Etheostoma flabellare	54330	54330	species	Etheostoma flabellare	54318	genus	Etheostoma	8165	family	Percidae	8111	order	Perciformes	186623	class	Actinopteri	7711	phylum	Chordata
C26T3:1:1108:14085:6505	Etheostoma flabellare	172	species	100	4		Etheostoma flabellare	54330	54330	species	Etheostoma flabellare	54318	genus	Etheostoma	8165	family	Percidae	8111	order	Perciformes	186623	class	Actinopteri	7711	phylum	Chordata
C26T3:1:1108:17148:12145	Etheostoma flabellare	172	species	100	4		Etheostoma flabellare	54330	54330	species	Etheostoma flabellare	54318	genus	Etheostoma	8165	family	Percidae	8111	order	Perciformes	186623	class	Actinopteri	7711	phylum	Chordata
C26T3:1:1119:12220:12102	Etheostoma flabellare	172	species	99	3		Etheostoma flabellare	54330	54330	species	Etheostoma flabellare	54318	genus	Etheostoma	8165	family	Percidae	8111	order	Perciformes	186623	class	Actinopteri	7711	phylum	Chordata
C26T3:1:1101:13067:4732	Etheostoma flabellare	171	species	100	65		Etheostoma flabellare	54330	54330	species	Etheostoma flabellare	54318	genus	Etheostoma	8165	family	Percidae	8111	order	Perciformes	186623	class	Actinopteri	7711	phylum	Chordata
C26T3:1:1101:23850:11879	Etheostoma flabellare	171	species	98	21		Etheostoma flabellare	54330	54330	species	Etheostoma flabellare	54318	genus	Etheostoma	8165	family	Percidae	8111	order	Perciformes	186623	class	Actinopteri	7711	phylum	Chordata
C26T3:1:1114:21047:4771	Etheostoma flabellare	171	species	100	3		Etheostoma flabellare	54330	54330	species	Etheostoma flabellare	54318	genus	Etheostoma	8165	family	Percidae	8111	order	Perciformes	186623	class	Actinopteri	7711	phylum	Chordata
C26T3:1:2108:17626:7130	Etheostoma flabellare	171	species	97	3		Etheostoma flabellare	54330	54330	species	Etheostoma flabellare	54318	genus	Etheostoma	8165	family	Percidae	8111	order	Perciformes	186623	class	Actinopteri	7711	phylum	Chordata
C26T3:1:1101:10364:4343	Etheostoma flabellare	169	species	99	1405		Etheostoma flabellare	54330	54330	species	Etheostoma flabellare	54318	genus	Etheostoma	8165	family	Percidae	8111	order	Perciformes	186623	class	Actinopteri	7711	phylum	Chordata
C26T3:1:1101:12787:1112	Etheostoma flabellare	169	species	99	30		Etheostoma flabellare	54330	54330	species	Etheostoma flabellare	54318	genus	Etheostoma	8165	family	Percidae	8111	order	Perciformes	186623	class	Actinopteri	7711	phylum	Chordata
C26T3:1:1101:13059:20388	Etheostoma flabellare	169	species	98	94		Etheostoma flabellare	54330	54330	species	Etheostoma flabellare	54318	genus	Etheostoma	8165	family	Percidae	8111	order	Perciformes	186623	class	Actinopteri	7711	phylum	Chordata
C26T3:1:1102:10881:10710	Etheostoma flabellare	169	species	99	2		Etheostoma flabellare	54330	54330	species	Etheostoma flabellare	54318	genus	Etheostoma	8165	family	Percidae	8111	order	Perciformes	186623	class	Actinopteri	7711	phylum	Chordata
C26T3:1:1104:17486:12213	Etheostoma flabellare	169	species	99	3		Etheostoma flabellare	54330	54330	species	Etheostoma flabellare	54318	genus	Etheostoma	8165	family	Percidae	8111	order	Perciformes	186623	class	Actinopteri	7711	phylum	Chordata
C26T3:1:1104:6921:11239	Etheostoma flabellare	169	species	99	2		Etheostoma flabellare	54330	54330	species	Etheostoma flabellare	54318	genus	Etheostoma	8165	family	Percidae	8111	order	Perciformes	186623	class	Actinopteri	7711	phylum	Chordata
C26T3:1:1105:26202:13420	Etheostoma flabellare	169	species	99	4		Etheostoma flabellare	54330	54330	species	Etheostoma flabellare	54318	genus	Etheostoma	8165	family	Percidae	8111	order	Perciformes	186623	class	Actinopteri	7711	phylum	Chordata
C26T3:1:1106:27256:11402	Etheostoma flabellare	169	species	99	3		Etheostoma flabellare	54330	54330	species	Etheostoma flabellare	54318	genus	Etheostoma	8165	family	Percidae	8111	order	Perciformes	186623	class	Actinopteri	7711	phylum	Chordata
C26T3:1:1107:15590:16300	Etheostoma flabellare	169	species	99	5		Etheostoma flabellare	54330	54330	species	Etheostoma flabellare	54318	genus	Etheostoma	8165	family	Percidae	8111	order	Perciformes	186623	class	Actinopteri	7711	phylum	Chordata
C26T3:1:1107:16337:22966	Etheostoma flabellare	169	species	99	2		Etheostoma flabellare	54330	54330	species	Etheostoma flabellare	54318	genus	Etheostoma	8165	family	Percidae	8111	order	Perciformes	186623	class	Actinopteri	7711	phylum	Chordata
C26T3:1:1107:17572:22702	Etheostoma flabellare	169	species	99	5		Etheostoma flabellare	54330	54330	species	Etheostoma flabellare	54318	genus	Etheostoma	8165	family	Percidae	8111	order	Perciformes	186623	class	Actinopteri	7711	phylum	Chordata
C26T3:1:1108:23801:18841	Etheostoma flabellare	169	species	99	3		Etheostoma flabellare	54330	54330	species	Etheostoma flabellare	54318	genus	Etheostoma	8165	family	Percidae	8111	order	Perciformes	186623	class	Actinopteri	7711	phylum	Chordata
C26T3:1:1109:10536:16726	Etheostoma flabellare	169	species	99	2		Etheostoma flabellare	54330	54330	species	Etheostoma flabellare	54318	genus	Etheostoma	8165	family	Percidae	8111	order	Perciformes	186623	class	Actinopteri	7711	phylum	Chordata
C26T3:1:1110:20147:17917	Etheostoma flabellare	169	species	99	2		Etheostoma flabellare	54330	54330	species	Etheostoma flabellare	54318	genus	Etheostoma	8165	family	Percidae	8111	order	Perciformes	186623	class	Actinopteri	7711	phylum	Chordata
C26T3:1:1111:26468:16605	Etheostoma flabellare	169	species	99	3		Etheostoma flabellare	54330	54330	species	Etheostoma flabellare	54318	genus	Etheostoma	8165	family	Percidae	8111	order	Perciformes	186623	class	Actinopteri	7711	phylum	Chordata
C26T3:1:1113:3270:19461	Etheostoma flabellare	169	species	99	4		Etheostoma flabellare	54330	54330	species	Etheostoma flabellare	54318	genus	Etheostoma	8165	family	Percidae	8111	order	Perciformes	186623	class	Actinopteri	7711	phylum	Chordata
C26T3:1:1116:10555:17998	Etheostoma flabellare	169	species	99	2		Etheostoma flabellare	54330	54330	species	Etheostoma flabellare	54318	genus	Etheostoma	8165	family	Percidae	8111	order	Perciformes	186623	class	Actinopteri	7711	phylum	Chordata
C26T3:1:1117:13887:2986	Etheostoma flabellare	169	species	99	2		Etheostoma flabellare	54330	54330	species	Etheostoma flabellare	54318	genus	Etheostoma	8165	family	Percidae	8111	order	Perciformes	186623	class	Actinopteri	7711	phylum	Chordata
C26T3:1:2101:22191:23664	Etheostoma flabellare	169	species	99	2		Etheostoma flabellare	54330	54330	species	Etheostoma flabellare	54318	genus	Etheostoma	8165	family	Percidae	8111	order	Perciformes	186623	class	Actinopteri	7711	phylum	Chordata
C26T3:1:2102:10697:17792	Etheostoma flabellare	169	species	99	2		Etheostoma flabellare	54330	54330	species	Etheostoma flabellare	54318	genus	Etheostoma	8165	family	Percidae	8111	order	Perciformes	186623	class	Actinopteri	7711	phylum	Chordata
C26T3:1:2107:22511:16697	Etheostoma flabellare	169	species	100	11		Etheostoma flabellare	54330	54330	species	Etheostoma flabellare	54318	genus	Etheostoma	8165	family	Percidae	8111	order	Perciformes	186623	class	Actinopteri	7711	phylum	Chordata
C26T3:1:2108:9122:7356	Etheostoma flabellare	169	species	99	2		Etheostoma flabellare	54330	54330	species	Etheostoma flabellare	54318	genus	Etheostoma	8165	family	Percidae	8111	order	Perciformes	186623	class	Actinopteri	7711	phylum	Chordata
C26T3:1:1108:6004:12717	Etheostoma flabellare	167	species	97	4		Etheostoma flabellare	54330	54330	species	Etheostoma flabellare	54318	genus	Etheostoma	8165	family	Percidae	8111	order	Perciformes	186623	class	Actinopteri	7711	phylum	Chordata
C26T3:1:1110:13401:8309	Etheostoma flabellare	167	species	99	15		Etheostoma flabellare	54330	54330	species	Etheostoma flabellare	54318	genus	Etheostoma	8165	family	Percidae	8111	order	Perciformes	186623	class	Actinopteri	7711	phylum	Chordata
C26T3:1:2103:5531:4568	Etheostoma flabellare	167	species	99	2		Etheostoma flabellare	54330	54330	species	Etheostoma flabellare	54318	genus	Etheostoma	8165	family	Percidae	8111	order	Perciformes	186623	class	Actinopteri	7711	phylum	Chordata
C26T3:1:1106:13356:2900	Etheostoma flabellare	165	species	99	2		Etheostoma flabellare	54330	54330	species	Etheostoma flabellare	54318	genus	Etheostoma	8165	family	Percidae	8111	order	Perciformes	186623	class	Actinopteri	7711	phylum	Chordata
C26T3:1:1109:26622:12986	Etheostoma flabellare	165	species	99	6		Etheostoma flabellare	54330	54330	species	Etheostoma flabellare	54318	genus	Etheostoma	8165	family	Percidae	8111	order	Perciformes	186623	class	Actinopteri	7711	phylum	Chordata
C26T3:1:1113:25113:11232	Etheostoma flabellare	165	species	98	117		Etheostoma flabellare	54330	54330	species	Etheostoma flabellare	54318	genus	Etheostoma	8165	family	Percidae	8111	order	Perciformes	186623	class	Actinopteri	7711	phylum	Chordata
C26T3:1:2108:22872:17688	Etheostoma flabellare	165	species	100	3		Etheostoma flabellare	54330	54330	species	Etheostoma flabellare	54318	genus	Etheostoma	8165	family	Percidae	8111	order	Perciformes	186623	class	Actinopteri	7711	phylum	Chordata
C26T3:1:2108:24459:7712	Etheostoma flabellare	165	species	99	3		Etheostoma flabellare	54330	54330	species	Etheostoma flabellare	54318	genus	Etheostoma	8165	family	Percidae	8111	order	Perciformes	186623	class	Actinopteri	7711	phylum	Chordata
C26T3:1:1105:3459:13629	Etheostoma gracile	191	species	97	8		Etheostoma gracile	54331	54331	species	Etheostoma gracile	54318	genus	Etheostoma	8165	family	Percidae	8111	order	Perciformes	186623	class	Actinopteri	7711	phylum	Chordata
C26T3:1:2106:18684:8749	Etheostoma gracile	180	species	99	3		Etheostoma gracile	54331	54331	species	Etheostoma gracile	54318	genus	Etheostoma	8165	family	Percidae	8111	order	Perciformes	186623	class	Actinopteri	7711	phylum	Chordata
C26T3:1:1101:8110:15864	Etheostoma gracile	176	species	99	32		Etheostoma gracile	54331	54331	species	Etheostoma gracile	54318	genus	Etheostoma	8165	family	Percidae	8111	order	Perciformes	186623	class	Actinopteri	7711	phylum	Chordata
C26T3:1:1107:8549:16014	Etheostoma gracile	165	species	97	2		Etheostoma gracile	54331	54331	species	Etheostoma gracile	54318	genus	Etheostoma	8165	family	Percidae	8111	order	Perciformes	186623	class	Actinopteri	7711	phylum	Chordata
C26T3:1:1106:3640:7500	Etheostoma nigrum	195	species	97	2		Etheostoma nigrum	54337	54337	species	Etheostoma nigrum	54318	genus	Etheostoma	8165	family	Percidae	8111	order	Perciformes	186623	class	Actinopteri	7711	phylum	Chordata
C26T3:1:1104:15321:22532	Etheostoma nigrum	191	species	99	4		Etheostoma nigrum	54337	54337	species	Etheostoma nigrum	54318	genus	Etheostoma	8165	family	Percidae	8111	order	Perciformes	186623	class	Actinopteri	7711	phylum	Chordata
C26T3:1:1113:16533:12927	Etheostoma nigrum	191	species	97	3		Etheostoma nigrum	54337	54337	species	Etheostoma nigrum	54318	genus	Etheostoma	8165	family	Percidae	8111	order	Perciformes	186623	class	Actinopteri	7711	phylum	Chordata
C26T3:1:1114:17776:5985	Etheostoma nigrum	191	species	97	2		Etheostoma nigrum	54337	54337	species	Etheostoma nigrum	54318	genus	Etheostoma	8165	family	Percidae	8111	order	Perciformes	186623	class	Actinopteri	7711	phylum	Chordata
C26T3:1:1115:10284:14958	Etheostoma nigrum	191	species	97	3		Etheostoma nigrum	54337	54337	species	Etheostoma nigrum	54318	genus	Etheostoma	8165	family	Percidae	8111	order	Perciformes	186623	class	Actinopteri	7711	phylum	Chordata
C26T3:1:2101:27449:9732	Etheostoma nigrum	191	species	97	5		Etheostoma nigrum	54337	54337	species	Etheostoma nigrum	54318	genus	Etheostoma	8165	family	Percidae	8111	order	Perciformes	186623	class	Actinopteri	7711	phylum	Chordata
C26T3:1:1102:8060:16838	Etheostoma nigrum	189	species	97	2		Etheostoma nigrum	54337	54337	species	Etheostoma nigrum	54318	genus	Etheostoma	8165	family	Percidae	8111	order	Perciformes	186623	class	Actinopteri	7711	phylum	Chordata
C26T3:1:1106:24224:21857	Etheostoma nigrum	182	species	97	4		Etheostoma nigrum	54337	54337	species	Etheostoma nigrum	54318	genus	Etheostoma	8165	family	Percidae	8111	order	Perciformes	186623	class	Actinopteri	7711	phylum	Chordata
C26T3:1:1115:14660:15688	Etheostoma nigrum	180	species	97	3		Etheostoma nigrum	54337	54337	species	Etheostoma nigrum	54318	genus	Etheostoma	8165	family	Percidae	8111	order	Perciformes	186623	class	Actinopteri	7711	phylum	Chordata
C26T3:1:2102:13371:3420	Etheostoma nigrum	180	species	97	2		Etheostoma nigrum	54337	54337	species	Etheostoma nigrum	54318	genus	Etheostoma	8165	family	Percidae	8111	order	Perciformes	186623	class	Actinopteri	7711	phylum	Chordata
C26T3:1:1101:11864:15430	Etheostoma nigrum	178	species	98.6667	101		Etheostoma nigrum	54337	54337	species	Etheostoma nigrum	54318	genus	Etheostoma	8165	family	Percidae	8111	order	Perciformes	186623	class	Actinopteri	7711	phylum	Chordata
C26T3:1:1101:13325:18466	Etheostoma nigrum	178	species	98.6667	105		Etheostoma nigrum	54337	54337	species	Etheostoma nigrum	54318	genus	Etheostoma	8165	family	Percidae	8111	order	Perciformes	186623	class	Actinopteri	7711	phylum	Chordata
C26T3:1:1101:15586:13067	Etheostoma nigrum	178	species	98.6667	56		Etheostoma nigrum	54337	54337	species	Etheostoma nigrum	54318	genus	Etheostoma	8165	family	Percidae	8111	order	Perciformes	186623	class	Actinopteri	7711	phylum	Chordata
C26T3:1:1101:10238:11000	Etheostoma nigrum	171	species	99.6667	225		Etheostoma nigrum	54337	54337	species	Etheostoma nigrum	54318	genus	Etheostoma	8165	family	Percidae	8111	order	Perciformes	186623	class	Actinopteri	7711	phylum	Chordata
C26T3:1:1105:17591:17941	Etheostoma nigrum	171	species	97.6667	2		Etheostoma nigrum	54337	54337	species	Etheostoma nigrum	54318	genus	Etheostoma	8165	family	Percidae	8111	order	Perciformes	186623	class	Actinopteri	7711	phylum	Chordata
C26T3:1:1106:20226:9113	Etheostoma nigrum	171	species	97.6667	2		Etheostoma nigrum	54337	54337	species	Etheostoma nigrum	54318	genus	Etheostoma	8165	family	Percidae	8111	order	Perciformes	186623	class	Actinopteri	7711	phylum	Chordata
C26T3:1:1106:27531:6304	Etheostoma nigrum	171	species	98.6667	191		Etheostoma nigrum	54337	54337	species	Etheostoma nigrum	54318	genus	Etheostoma	8165	family	Percidae	8111	order	Perciformes	186623	class	Actinopteri	7711	phylum	Chordata
C26T3:1:1110:25173:10743	Etheostoma nigrum	171	species	97	3		Etheostoma nigrum	54337	54337	species	Etheostoma nigrum	54318	genus	Etheostoma	8165	family	Percidae	8111	order	Perciformes	186623	class	Actinopteri	7711	phylum	Chordata
C26T3:1:1114:15495:1197	Etheostoma nigrum	171	species	97.6667	2		Etheostoma nigrum	54337	54337	species	Etheostoma nigrum	54318	genus	Etheostoma	8165	family	Percidae	8111	order	Perciformes	186623	class	Actinopteri	7711	phylum	Chordata
C26T3:1:1115:26577:17325	Etheostoma nigrum	171	species	97.6667	26		Etheostoma nigrum	54337	54337	species	Etheostoma nigrum	54318	genus	Etheostoma	8165	family	Percidae	8111	order	Perciformes	186623	class	Actinopteri	7711	phylum	Chordata
C26T3:1:2104:13180:3502	Etheostoma nigrum	171	species	99.6667	2		Etheostoma nigrum	54337	54337	species	Etheostoma nigrum	54318	genus	Etheostoma	8165	family	Percidae	8111	order	Perciformes	186623	class	Actinopteri	7711	phylum	Chordata
C26T3:1:1101:10738:2578	Etheostoma nigrum	169	species	98.6667	49		Etheostoma nigrum	54337	54337	species	Etheostoma nigrum	54318	genus	Etheostoma	8165	family	Percidae	8111	order	Perciformes	186623	class	Actinopteri	7711	phylum	Chordata
C26T3:1:1101:10809:11030	Etheostoma nigrum	169	species	98.6667	35		Etheostoma nigrum	54337	54337	species	Etheostoma nigrum	54318	genus	Etheostoma	8165	family	Percidae	8111	order	Perciformes	186623	class	Actinopteri	7711	phylum	Chordata
C26T3:1:1102:9726:4109	Etheostoma nigrum	169	species	97.6667	2		Etheostoma nigrum	54337	54337	species	Etheostoma nigrum	54318	genus	Etheostoma	8165	family	Percidae	8111	order	Perciformes	186623	class	Actinopteri	7711	phylum	Chordata
C26T3:1:1103:7377:17011	Etheostoma nigrum	169	species	98.6667	102		Etheostoma nigrum	54337	54337	species	Etheostoma nigrum	54318	genus	Etheostoma	8165	family	Percidae	8111	order	Perciformes	186623	class	Actinopteri	7711	phylum	Chordata
C26T3:1:1104:7740:3836	Etheostoma nigrum	169	species	97.6667	2		Etheostoma nigrum	54337	54337	species	Etheostoma nigrum	54318	genus	Etheostoma	8165	family	Percidae	8111	order	Perciformes	186623	class	Actinopteri	7711	phylum	Chordata
C26T3:1:1114:20982:3121	Etheostoma nigrum	169	species	97.6667	56		Etheostoma nigrum	54337	54337	species	Etheostoma nigrum	54318	genus	Etheostoma	8165	family	Percidae	8111	order	Perciformes	186623	class	Actinopteri	7711	phylum	Chordata
C26T3:1:1117:15398:1936	Etheostoma nigrum	169	species	98.6667	6		Etheostoma nigrum	54337	54337	species	Etheostoma nigrum	54318	genus	Etheostoma	8165	family	Percidae	8111	order	Perciformes	186623	class	Actinopteri	7711	phylum	Chordata
C26T3:1:1117:4894:6881	Etheostoma nigrum	169	species	98.6667	103		Etheostoma nigrum	54337	54337	species	Etheostoma nigrum	54318	genus	Etheostoma	8165	family	Percidae	8111	order	Perciformes	186623	class	Actinopteri	7711	phylum	Chordata
C26T3:1:2101:21969:17789	Etheostoma nigrum	169	species	97.6667	2		Etheostoma nigrum	54337	54337	species	Etheostoma nigrum	54318	genus	Etheostoma	8165	family	Percidae	8111	order	Perciformes	186623	class	Actinopteri	7711	phylum	Chordata
C26T3:1:2103:7133:20624	Etheostoma nigrum	169	species	97.6667	9		Etheostoma nigrum	54337	54337	species	Etheostoma nigrum	54318	genus	Etheostoma	8165	family	Percidae	8111	order	Perciformes	186623	class	Actinopteri	7711	phylum	Chordata
C26T3:1:2107:18722:19666	Etheostoma nigrum	169	species	97.6667	16		Etheostoma nigrum	54337	54337	species	Etheostoma nigrum	54318	genus	Etheostoma	8165	family	Percidae	8111	order	Perciformes	186623	class	Actinopteri	7711	phylum	Chordata
C26T3:1:1103:10268:14746	Etheostoma nigrum	167	species	97	4		Etheostoma nigrum	54337	54337	species	Etheostoma nigrum	54318	genus	Etheostoma	8165	family	Percidae	8111	order	Perciformes	186623	class	Actinopteri	7711	phylum	Chordata
C26T3:1:1110:21726:8183	Etheostoma nigrum	167	species	97.6667	19		Etheostoma nigrum	54337	54337	species	Etheostoma nigrum	54318	genus	Etheostoma	8165	family	Percidae	8111	order	Perciformes	186623	class	Actinopteri	7711	phylum	Chordata
C26T3:1:1116:5297:16137	Etheostoma nigrum	167	species	97	2		Etheostoma nigrum	54337	54337	species	Etheostoma nigrum	54318	genus	Etheostoma	8165	family	Percidae	8111	order	Perciformes	186623	class	Actinopteri	7711	phylum	Chordata
C26T3:1:2106:10701:22512	Etheostoma nigrum	167	species	97.6667	2		Etheostoma nigrum	54337	54337	species	Etheostoma nigrum	54318	genus	Etheostoma	8165	family	Percidae	8111	order	Perciformes	186623	class	Actinopteri	7711	phylum	Chordata
C26T3:1:1101:21286:2721	Etheostoma nigrum	165	species	98.6667	30		Etheostoma nigrum	54337	54337	species	Etheostoma nigrum	54318	genus	Etheostoma	8165	family	Percidae	8111	order	Perciformes	186623	class	Actinopteri	7711	phylum	Chordata
C26T3:1:1102:5969:16524	Etheostoma olmstedi	191	species	97	5		Etheostoma olmstedi	417934	417934	species	Etheostoma olmstedi	54318	genus	Etheostoma	8165	family	Percidae	8111	order	Perciformes	186623	class	Actinopteri	7711	phylum	Chordata
C26T3:1:2102:5825:19158	Etheostoma olmstedi	191	species	97	2		Etheostoma olmstedi	417934	417934	species	Etheostoma olmstedi	54318	genus	Etheostoma	8165	family	Percidae	8111	order	Perciformes	186623	class	Actinopteri	7711	phylum	Chordata
C26T3:1:2108:20876:3005	Etheostoma olmstedi	180	species	99	2		Etheostoma olmstedi	417934	417934	species	Etheostoma olmstedi	54318	genus	Etheostoma	8165	family	Percidae	8111	order	Perciformes	186623	class	Actinopteri	7711	phylum	Chordata
C26T3:1:1109:25612:6622	Etheostoma olmstedi	178	species	97	2		Etheostoma olmstedi	417934	417934	species	Etheostoma olmstedi	54318	genus	Etheostoma	8165	family	Percidae	8111	order	Perciformes	186623	class	Actinopteri	7711	phylum	Chordata
C26T3:1:1101:10247:23043	Etheostoma olmstedi	169	species	99	310		Etheostoma olmstedi	417934	417934	species	Etheostoma olmstedi	54318	genus	Etheostoma	8165	family	Percidae	8111	order	Perciformes	186623	class	Actinopteri	7711	phylum	Chordata
C26T3:1:1101:9604:10669	Etheostoma olmstedi	169	species	99	4		Etheostoma olmstedi	417934	417934	species	Etheostoma olmstedi	54318	genus	Etheostoma	8165	family	Percidae	8111	order	Perciformes	186623	class	Actinopteri	7711	phylum	Chordata
C26T3:1:1104:11165:4276	Etheostoma olmstedi	169	species	98	14		Etheostoma olmstedi	417934	417934	species	Etheostoma olmstedi	54318	genus	Etheostoma	8165	family	Percidae	8111	order	Perciformes	186623	class	Actinopteri	7711	phylum	Chordata
C26T3:1:1104:15325:24752	Etheostoma olmstedi	169	species	99	11		Etheostoma olmstedi	417934	417934	species	Etheostoma olmstedi	54318	genus	Etheostoma	8165	family	Percidae	8111	order	Perciformes	186623	class	Actinopteri	7711	phylum	Chordata
C26T3:1:1105:2984:10939	Etheostoma olmstedi	169	species	99	2		Etheostoma olmstedi	417934	417934	species	Etheostoma olmstedi	54318	genus	Etheostoma	8165	family	Percidae	8111	order	Perciformes	186623	class	Actinopteri	7711	phylum	Chordata
C26T3:1:1109:22933:19695	Etheostoma olmstedi	169	species	99	2		Etheostoma olmstedi	417934	417934	species	Etheostoma olmstedi	54318	genus	Etheostoma	8165	family	Percidae	8111	order	Perciformes	186623	class	Actinopteri	7711	phylum	Chordata
C26T3:1:1106:29023:14615	Etheostoma smithi	167	species	97	2		Etheostoma smithi	91964	91964	species	Etheostoma smithi	54318	genus	Etheostoma	8165	family	Percidae	8111	order	Perciformes	186623	class	Actinopteri	7711	phylum	Chordata
C26T3:1:2114:25875:22634	Gallus gallus	239	species	99	2		Gallus gallus	9031	9031	species	Gallus gallus	9030	genus	Gallus	9005	family	Phasianidae	8976	order	Galliformes	8782	class	Aves	7711	phylum	Chordata
C26T3:1:1101:10090:1383	Gallus gallus	215	species	99	76		Gallus gallus	9031	9031	species	Gallus gallus	9030	genus	Gallus	9005	family	Phasianidae	8976	order	Galliformes	8782	class	Aves	7711	phylum	Chordata
C26T3:1:1101:14484:1315	Gallus gallus	215	species	99	49		Gallus gallus	9031	9031	species	Gallus gallus	9030	genus	Gallus	9005	family	Phasianidae	8976	order	Galliformes	8782	class	Aves	7711	phylum	Chordata
C26T3:1:1111:3874:10913	Gallus gallus	215	species	99	2		Gallus gallus	9031	9031	species	Gallus gallus	9030	genus	Gallus	9005	family	Phasianidae	8976	order	Galliformes	8782	class	Aves	7711	phylum	Chordata
C26T3:1:2108:11680:24435	Gallus gallus	215	species	99	2		Gallus gallus	9031	9031	species	Gallus gallus	9030	genus	Gallus	9005	family	Phasianidae	8976	order	Galliformes	8782	class	Aves	7711	phylum	Chordata
C26T3:1:1112:23789:24430	Gallus gallus	209	species	98	5		Gallus gallus	9031	9031	species	Gallus gallus	9030	genus	Gallus	9005	family	Phasianidae	8976	order	Galliformes	8782	class	Aves	7711	phylum	Chordata
C26T3:1:2114:16554:8029	Gallus gallus	209	species	98	2		Gallus gallus	9031	9031	species	Gallus gallus	9030	genus	Gallus	9005	family	Phasianidae	8976	order	Galliformes	8782	class	Aves	7711	phylum	Chordata
C26T3:1:1111:28079:10895	Gallus gallus	206	species	98	4		Gallus gallus	9031	9031	species	Gallus gallus	9030	genus	Gallus	9005	family	Phasianidae	8976	order	Galliformes	8782	class	Aves	7711	phylum	Chordata
C26T3:1:1106:9805:15551	Gallus gallus	196	species	100	51		Gallus gallus	9031	9031	species	Gallus gallus	9030	genus	Gallus	9005	family	Phasianidae	8976	order	Galliformes	8782	class	Aves	7711	phylum	Chordata
C26T3:1:1101:12360:18939	Gallus gallus	191	species	99	8		Gallus gallus	9031	9031	species	Gallus gallus	9030	genus	Gallus	9005	family	Phasianidae	8976	order	Galliformes	8782	class	Aves	7711	phylum	Chordata
C26T3:1:1101:9054:10941	Gallus gallus	191	species	99	3		Gallus gallus	9031	9031	species	Gallus gallus	9030	genus	Gallus	9005	family	Phasianidae	8976	order	Galliformes	8782	class	Aves	7711	phylum	Chordata
C26T3:1:1105:18245:9045	Gallus gallus	191	species	99	3		Gallus gallus	9031	9031	species	Gallus gallus	9030	genus	Gallus	9005	family	Phasianidae	8976	order	Galliformes	8782	class	Aves	7711	phylum	Chordata
C26T3:1:1116:26952:14142	Gallus gallus	191	species	99	3		Gallus gallus	9031	9031	species	Gallus gallus	9030	genus	Gallus	9005	family	Phasianidae	8976	order	Galliformes	8782	class	Aves	7711	phylum	Chordata
C26T3:1:1102:10150:22881	Gallus gallus	187	species	98	2		Gallus gallus	9031	9031	species	Gallus gallus	9030	genus	Gallus	9005	family	Phasianidae	8976	order	Galliformes	8782	class	Aves	7711	phylum	Chordata
C26T3:1:1109:7640:9633	Gallus gallus	187	species	100	14		Gallus gallus	9031	9031	species	Gallus gallus	9030	genus	Gallus	9005	family	Phasianidae	8976	order	Galliformes	8782	class	Aves	7711	phylum	Chordata
C26T3:1:1101:10674:21186	Gallus gallus	183	species	100	19		Gallus gallus	9031	9031	species	Gallus gallus	9030	genus	Gallus	9005	family	Phasianidae	8976	order	Galliformes	8782	class	Aves	7711	phylum	Chordata
C26T3:1:1101:23024:11952	Gallus gallus	183	species	99	85		Gallus gallus	9031	9031	species	Gallus gallus	9030	genus	Gallus	9005	family	Phasianidae	8976	order	Galliformes	8782	class	Aves	7711	phylum	Chordata
C26T3:1:1104:6763:17983	Gallus gallus	183	species	99	22		Gallus gallus	9031	9031	species	Gallus gallus	9030	genus	Gallus	9005	family	Phasianidae	8976	order	Galliformes	8782	class	Aves	7711	phylum	Chordata
C26T3:1:1105:24103:5701	Gallus gallus	183	species	99	63		Gallus gallus	9031	9031	species	Gallus gallus	9030	genus	Gallus	9005	family	Phasianidae	8976	order	Galliformes	8782	class	Aves	7711	phylum	Chordata
C26T3:1:1108:11517:3518	Gallus gallus	183	species	99	26		Gallus gallus	9031	9031	species	Gallus gallus	9030	genus	Gallus	9005	family	Phasianidae	8976	order	Galliformes	8782	class	Aves	7711	phylum	Chordata
C26T3:1:1102:6666:17639	Gallus gallus	182	species	97	2		Gallus gallus	9031	9031	species	Gallus gallus	9030	genus	Gallus	9005	family	Phasianidae	8976	order	Galliformes	8782	class	Aves	7711	phylum	Chordata
C26T3:1:1103:12947:2241	Gallus gallus	182	species	97	3		Gallus gallus	9031	9031	species	Gallus gallus	9030	genus	Gallus	9005	family	Phasianidae	8976	order	Galliformes	8782	class	Aves	7711	phylum	Chordata
C26T3:1:1101:16811:10360	Gallus gallus	171	species	100	172		Gallus gallus	9031	9031	species	Gallus gallus	9030	genus	Gallus	9005	family	Phasianidae	8976	order	Galliformes	8782	class	Aves	7711	phylum	Chordata
C26T3:1:1101:10150:12423	Gallus gallus	169	species	100	161		Gallus gallus	9031	9031	species	Gallus gallus	9030	genus	Gallus	9005	family	Phasianidae	8976	order	Galliformes	8782	class	Aves	7711	phylum	Chordata
C26T3:1:1101:18186:9173	Gyrinophilus porphyriticus	183	species	98.2222	3		Gyrinophilus porphyriticus	134760	134760	species	Gyrinophilus porphyriticus	134759	genus	Gyrinophilus	8332	family	Plethodontidae	8293	order	Caudata	8292	class	Amphibia	7711	phylum	Chordata
C26T3:1:1112:6859:22856	Hominidae	206	family	92.8696	6		Hominidae	9604	9604	family	Hominidae	9443	order	Primates	40674	class	Mammalia	7711	phylum	Chordata
C26T3:1:2104:9324:7029	Hominidae	198	family	92.7647	2		Hominidae	9604	9604	family	Hominidae	9443	order	Primates	40674	class	Mammalia	7711	phylum	Chordata
C26T3:1:1109:18451:18328	Hominidae	193	family	92.5833	4		Hominidae	9604	9604	family	Hominidae	9443	order	Primates	40674	class	Mammalia	7711	phylum	Chordata
C26T3:1:2110:13569:23594	Hominidae	180	family	94.72	2		Hominidae	9604	9604	family	Hominidae	9443	order	Primates	40674	class	Mammalia	7711	phylum	Chordata
C26T3:1:1104:10338:22729	Hominidae	176	family	93.3333	31		Hominidae	9604	9604	family	Hominidae	9443	order	Primates	40674	class	Mammalia	7711	phylum	Chordata
C26T3:1:2106:27556:16618	Hominidae	174	family	93.8	3		Hominidae	9604	9604	family	Hominidae	9443	order	Primates	40674	class	Mammalia	7711	phylum	Chordata
C26T3:1:1107:22574:15819	Hominidae	172	family	94	2		Hominidae	9604	9604	family	Hominidae	9443	order	Primates	40674	class	Mammalia	7711	phylum	Chordata
C26T3:1:1105:18444:4715	Hominidae	171	family	93	2		Hominidae	9604	9604	family	Hominidae	9443	order	Primates	40674	class	Mammalia	7711	phylum	Chordata
C26T3:1:1118:21592:18380	Hominidae	167	family	92	2		Hominidae	9604	9604	family	Hominidae	9443	order	Primates	40674	class	Mammalia	7711	phylum	Chordata
C26T3:1:2109:7591:2241	Hominidae	163	family	91.92	2		Hominidae	9604	9604	family	Hominidae	9443	order	Primates	40674	class	Mammalia	7711	phylum	Chordata
C26T3:1:2113:4680:16114	Hominidae	163	family	92	2		Hominidae	9604	9604	family	Hominidae	9443	order	Primates	40674	class	Mammalia	7711	phylum	Chordata
C26T3:1:1112:7389:23217	Hominidae	161	family	94	3		Hominidae	9604	9604	family	Hominidae	9443	order	Primates	40674	class	Mammalia	7711	phylum	Chordata
C26T3:1:1114:3422:16128	Hominidae	161	family	91	2		Hominidae	9604	9604	family	Hominidae	9443	order	Primates	40674	class	Mammalia	7711	phylum	Chordata
C26T3:1:1111:13642:17842	Hominidae	158	family	91.6	3		Hominidae	9604	9604	family	Hominidae	9443	order	Primates	40674	class	Mammalia	7711	phylum	Chordata
C26T3:1:1105:28756:12081	Hominidae	152	family	94.9565	54		Hominidae	9604	9604	family	Hominidae	9443	order	Primates	40674	class	Mammalia	7711	phylum	Chordata
C26T3:1:1108:4218:18944	Hominidae	150	family	94.375	24		Hominidae	9604	9604	family	Hominidae	9443	order	Primates	40674	class	Mammalia	7711	phylum	Chordata
C26T3:1:1101:20522:10700	Hominidae	148	family	94	40		Hominidae	9604	9604	family	Hominidae	9443	order	Primates	40674	class	Mammalia	7711	phylum	Chordata
C26T3:1:1102:7483:19472	Hominidae	148	family	97	2		Hominidae	9604	9604	family	Hominidae	9443	order	Primates	40674	class	Mammalia	7711	phylum	Chordata
C26T3:1:1103:7693:20098	Hominidae	148	family	96.1739	2		Hominidae	9604	9604	family	Hominidae	9443	order	Primates	40674	class	Mammalia	7711	phylum	Chordata
C26T3:1:1110:11073:19273	Hominidae	148	family	94	4		Hominidae	9604	9604	family	Hominidae	9443	order	Primates	40674	class	Mammalia	7711	phylum	Chordata
C26T3:1:2107:2154:15787	Hominidae	148	family	94	2		Hominidae	9604	9604	family	Hominidae	9443	order	Primates	40674	class	Mammalia	7711	phylum	Chordata
C26T3:1:1101:10549:20661	Hominidae	147	family	94.5238	108		Hominidae	9604	9604	family	Hominidae	9443	order	Primates	40674	class	Mammalia	7711	phylum	Chordata
C26T3:1:1102:2893:11348	Hominidae	147	family	93.9565	2		Hominidae	9604	9604	family	Hominidae	9443	order	Primates	40674	class	Mammalia	7711	phylum	Chordata
C26T3:1:1103:22265:7047	Hominidae	147	family	96.087	2		Hominidae	9604	9604	family	Hominidae	9443	order	Primates	40674	class	Mammalia	7711	phylum	Chordata
C26T3:1:1104:8763:19064	Hominidae	147	family	93.9565	18		Hominidae	9604	9604	family	Hominidae	9443	order	Primates	40674	class	Mammalia	7711	phylum	Chordata
C26T3:1:1106:10139:8936	Hominidae	147	family	95.1739	20		Hominidae	9604	9604	family	Hominidae	9443	order	Primates	40674	class	Mammalia	7711	phylum	Chordata
C26T3:1:1109:26825:4916	Hominidae	147	family	92.0833	3		Hominidae	9604	9604	family	Hominidae	9443	order	Primates	40674	class	Mammalia	7711	phylum	Chordata
C26T3:1:2101:13102:11902	Hominidae	147	family	94.0435	2		Hominidae	9604	9604	family	Hominidae	9443	order	Primates	40674	class	Mammalia	7711	phylum	Chordata
C26T3:1:1103:10218:12746	Hominidae	145	family	93	5		Hominidae	9604	9604	family	Hominidae	9443	order	Primates	40674	class	Mammalia	7711	phylum	Chordata
C26T3:1:1103:3697:16514	Hominidae	145	family	93.9565	26		Hominidae	9604	9604	family	Hominidae	9443	order	Primates	40674	class	Mammalia	7711	phylum	Chordata
C26T3:1:1112:26668:18577	Hominidae	145	family	93.087	3		Hominidae	9604	9604	family	Hominidae	9443	order	Primates	40674	class	Mammalia	7711	phylum	Chordata
C26T3:1:1119:17396:14835	Hominidae	145	family	96.2174	2		Hominidae	9604	9604	family	Hominidae	9443	order	Primates	40674	class	Mammalia	7711	phylum	Chordata
C26T3:1:1101:10765:6358	Hominidae	143	family	93.1739	97		Hominidae	9604	9604	family	Hominidae	9443	order	Primates	40674	class	Mammalia	7711	phylum	Chordata
C26T3:1:1113:12660:14804	Hominidae	143	family	93.9565	2		Hominidae	9604	9604	family	Hominidae	9443	order	Primates	40674	class	Mammalia	7711	phylum	Chordata
C26T3:1:2109:19554:22364	Hominidae	143	family	93	2		Hominidae	9604	9604	family	Hominidae	9443	order	Primates	40674	class	Mammalia	7711	phylum	Chordata
C26T3:1:1106:17103:19586	Hominidae	141	family	92.5714	8		Hominidae	9604	9604	family	Hominidae	9443	order	Primates	40674	class	Mammalia	7711	phylum	Chordata
C26T3:1:1116:5583:11316	Hominidae	141	family	96.8261	3		Hominidae	9604	9604	family	Hominidae	9443	order	Primates	40674	class	Mammalia	7711	phylum	Chordata
C26T3:1:2110:15521:5143	Hominidae	141	family	94.3333	2		Hominidae	9604	9604	family	Hominidae	9443	order	Primates	40674	class	Mammalia	7711	phylum	Chordata
C26T3:1:1114:21785:18287	Hominidae	139	family	92	2		Hominidae	9604	9604	family	Hominidae	9443	order	Primates	40674	class	Mammalia	7711	phylum	Chordata
C26T3:1:1117:18616:16577	Hominidae	139	family	93.3	2		Hominidae	9604	9604	family	Hominidae	9443	order	Primates	40674	class	Mammalia	7711	phylum	Chordata
C26T3:1:1103:6177:3433	Hominidae	137	family	92	20		Hominidae	9604	9604	family	Hominidae	9443	order	Primates	40674	class	Mammalia	7711	phylum	Chordata
C26T3:1:1106:6949:19247	Hominidae	137	family	92	4		Hominidae	9604	9604	family	Hominidae	9443	order	Primates	40674	class	Mammalia	7711	phylum	Chordata
C26T3:1:1110:19835:18060	Hominidae	137	family	91.8571	2		Hominidae	9604	9604	family	Hominidae	9443	order	Primates	40674	class	Mammalia	7711	phylum	Chordata
C26T3:1:1103:19369:15041	Hominidae	135	family	93	22		Hominidae	9604	9604	family	Hominidae	9443	order	Primates	40674	class	Mammalia	7711	phylum	Chordata
C26T3:1:1105:3200:12425	Hominidae	134	family	93.4762	2		Hominidae	9604	9604	family	Hominidae	9443	order	Primates	40674	class	Mammalia	7711	phylum	Chordata
C26T3:1:1108:11895:18278	Hominidae	134	family	91	25		Hominidae	9604	9604	family	Hominidae	9443	order	Primates	40674	class	Mammalia	7711	phylum	Chordata
C26T3:1:1104:3189:17669	Hominidae	132	family	90.8696	44		Hominidae	9604	9604	family	Hominidae	9443	order	Primates	40674	class	Mammalia	7711	phylum	Chordata
C26T3:1:1107:19656:11071	Hominidae	132	family	91	3		Hominidae	9604	9604	family	Hominidae	9443	order	Primates	40674	class	Mammalia	7711	phylum	Chordata
C26T3:1:1102:15291:13717	Hominidae	128	family	90	11		Hominidae	9604	9604	family	Hominidae	9443	order	Primates	40674	class	Mammalia	7711	phylum	Chordata
C26T3:1:1118:17270:10018	Hominidae	128	family	90.6522	2		Hominidae	9604	9604	family	Hominidae	9443	order	Primates	40674	class	Mammalia	7711	phylum	Chordata
C26T3:1:1108:15474:14621	Hominidae	119	family	94	3		Hominidae	9604	9604	family	Hominidae	9443	order	Primates	40674	class	Mammalia	7711	phylum	Chordata
C26T3:1:1101:10098:14132	Hominidae	115	family	100	13		Hominidae	9604	9604	family	Hominidae	9443	order	Primates	40674	class	Mammalia	7711	phylum	Chordata
C26T3:1:1103:2998:17012	Hominidae	115	family	100	5		Hominidae	9604	9604	family	Hominidae	9443	order	Primates	40674	class	Mammalia	7711	phylum	Chordata
C26T3:1:1108:8484:4633	Hominidae	113	family	100	2		Hominidae	9604	9604	family	Hominidae	9443	order	Primates	40674	class	Mammalia	7711	phylum	Chordata
C26T3:1:1109:13969:5276	Homo	191	genus	96.72	9		Homo	9605	9605	genus	Homo	9604	family	Hominidae	9443	order	Primates	40674	class	Mammalia	7711	phylum	Chordata
C26T3:1:1108:9071:24159	Homo	189	genus	96.24	3		Homo	9605	9605	genus	Homo	9604	family	Hominidae	9443	order	Primates	40674	class	Mammalia	7711	phylum	Chordata
C26T3:1:1103:14850:7700	Homo	187	genus	96	2		Homo	9605	9605	genus	Homo	9604	family	Hominidae	9443	order	Primates	40674	class	Mammalia	7711	phylum	Chordata
C26T3:1:1113:18802:11697	Homo	187	genus	96	2		Homo	9605	9605	genus	Homo	9604	family	Hominidae	9443	order	Primates	40674	class	Mammalia	7711	phylum	Chordata
C26T3:1:1106:25048:12888	Homo	185	genus	95.48	4		Homo	9605	9605	genus	Homo	9604	family	Hominidae	9443	order	Primates	40674	class	Mammalia	7711	phylum	Chordata
C26T3:1:2107:28439:14120	Homo	185	genus	96	2		Homo	9605	9605	genus	Homo	9604	family	Hominidae	9443	order	Primates	40674	class	Mammalia	7711	phylum	Chordata
C26T3:1:1103:2872:7916	Homo	183	genus	96	3		Homo	9605	9605	genus	Homo	9604	family	Hominidae	9443	order	Primates	40674	class	Mammalia	7711	phylum	Chordata
C26T3:1:1105:25812:5171	Homo	183	genus	95.24	2		Homo	9605	9605	genus	Homo	9604	family	Hominidae	9443	order	Primates	40674	class	Mammalia	7711	phylum	Chordata
C26T3:1:1108:18193:7184	Homo	183	genus	95	3		Homo	9605	9605	genus	Homo	9604	family	Hominidae	9443	order	Primates	40674	class	Mammalia	7711	phylum	Chordata
C26T3:1:1110:7233:22931	Homo	183	genus	95.6	3		Homo	9605	9605	genus	Homo	9604	family	Hominidae	9443	order	Primates	40674	class	Mammalia	7711	phylum	Chordata
C26T3:1:2102:25794:14895	Homo	183	genus	95	2		Homo	9605	9605	genus	Homo	9604	family	Hominidae	9443	order	Primates	40674	class	Mammalia	7711	phylum	Chordata
C26T3:1:1104:28883:11465	Homo	182	genus	95	5		Homo	9605	9605	genus	Homo	9604	family	Hominidae	9443	order	Primates	40674	class	Mammalia	7711	phylum	Chordata
C26T3:1:1101:18483:5775	Homo	167	genus	95	4		Homo	9605	9605	genus	Homo	9604	family	Hominidae	9443	order	Primates	40674	class	Mammalia	7711	phylum	Chordata
C26T3:1:1111:5774:11443	Homo	165	genus	95.4286	2		Homo	9605	9605	genus	Homo	9604	family	Hominidae	9443	order	Primates	40674	class	Mammalia	7711	phylum	Chordata
C26T3:1:1101:17424:13392	Homo	163	genus	98.12	177		Homo	9605	9605	genus	Homo	9604	family	Hominidae	9443	order	Primates	40674	class	Mammalia	7711	phylum	Chordata
C26T3:1:1102:10234:19438	Homo	163	genus	97	11		Homo	9605	9605	genus	Homo	9604	family	Hominidae	9443	order	Primates	40674	class	Mammalia	7711	phylum	Chordata
C26T3:1:1102:17083:17820	Homo	163	genus	97.32	13		Homo	9605	9605	genus	Homo	9604	family	Hominidae	9443	order	Primates	40674	class	Mammalia	7711	phylum	Chordata
C26T3:1:1103:14504:23116	Homo	163	genus	98.1739	35		Homo	9605	9605	genus	Homo	9604	family	Hominidae	9443	order	Primates	40674	class	Mammalia	7711	phylum	Chordata
C26T3:1:1105:16390:11257	Homo	163	genus	96.5217	4		Homo	9605	9605	genus	Homo	9604	family	Hominidae	9443	order	Primates	40674	class	Mammalia	7711	phylum	Chordata
C26T3:1:1117:22051:10430	Homo	163	genus	98	3		Homo	9605	9605	genus	Homo	9604	family	Hominidae	9443	order	Primates	40674	class	Mammalia	7711	phylum	Chordata
C26T3:1:2103:26178:21601	Homo	163	genus	96	2		Homo	9605	9605	genus	Homo	9604	family	Hominidae	9443	order	Primates	40674	class	Mammalia	7711	phylum	Chordata
C26T3:1:2105:5549:21089	Homo	163	genus	96	2		Homo	9605	9605	genus	Homo	9604	family	Hominidae	9443	order	Primates	40674	class	Mammalia	7711	phylum	Chordata
C26T3:1:1101:11312:22327	Homo	161	genus	96	234		Homo	9605	9605	genus	Homo	9604	family	Hominidae	9443	order	Primates	40674	class	Mammalia	7711	phylum	Chordata
C26T3:1:1101:16374:2526	Homo	161	genus	95.6667	14		Homo	9605	9605	genus	Homo	9604	family	Hominidae	9443	order	Primates	40674	class	Mammalia	7711	phylum	Chordata
C26T3:1:1118:27471:6094	Homo	161	genus	98	2		Homo	9605	9605	genus	Homo	9604	family	Hominidae	9443	order	Primates	40674	class	Mammalia	7711	phylum	Chordata
C26T3:1:2103:10613:20292	Homo	161	genus	96	4		Homo	9605	9605	genus	Homo	9604	family	Hominidae	9443	order	Primates	40674	class	Mammalia	7711	phylum	Chordata
C26T3:1:2107:24191:8281	Homo	161	genus	97	93		Homo	9605	9605	genus	Homo	9604	family	Hominidae	9443	order	Primates	40674	class	Mammalia	7711	phylum	Chordata
C26T3:1:1101:11767:10248	Homo	159	genus	96.087	680		Homo	9605	9605	genus	Homo	9604	family	Hominidae	9443	order	Primates	40674	class	Mammalia	7711	phylum	Chordata
C26T3:1:1101:14185:17351	Homo	159	genus	96.087	3		Homo	9605	9605	genus	Homo	9604	family	Hominidae	9443	order	Primates	40674	class	Mammalia	7711	phylum	Chordata
C26T3:1:1103:17244:5956	Homo	159	genus	96.2609	2		Homo	9605	9605	genus	Homo	9604	family	Hominidae	9443	order	Primates	40674	class	Mammalia	7711	phylum	Chordata
C26T3:1:1104:8252:5662	Homo	159	genus	96	51		Homo	9605	9605	genus	Homo	9604	family	Hominidae	9443	order	Primates	40674	class	Mammalia	7711	phylum	Chordata
C26T3:1:1107:3592:6966	Homo	159	genus	96	2		Homo	9605	9605	genus	Homo	9604	family	Hominidae	9443	order	Primates	40674	class	Mammalia	7711	phylum	Chordata
C26T3:1:1108:10858:9650	Homo	159	genus	95.6667	3		Homo	9605	9605	genus	Homo	9604	family	Hominidae	9443	order	Primates	40674	class	Mammalia	7711	phylum	Chordata
C26T3:1:1109:13788:20513	Homo	159	genus	96	2		Homo	9605	9605	genus	Homo	9604	family	Hominidae	9443	order	Primates	40674	class	Mammalia	7711	phylum	Chordata
C26T3:1:1117:2951:9577	Homo	159	genus	96	71		Homo	9605	9605	genus	Homo	9604	family	Hominidae	9443	order	Primates	40674	class	Mammalia	7711	phylum	Chordata
C26T3:1:2108:17300:7933	Homo	159	genus	96	2		Homo	9605	9605	genus	Homo	9604	family	Hominidae	9443	order	Primates	40674	class	Mammalia	7711	phylum	Chordata
C26T3:1:1104:9942:15235	Homo	158	genus	96.1364	10		Homo	9605	9605	genus	Homo	9604	family	Hominidae	9443	order	Primates	40674	class	Mammalia	7711	phylum	Chordata
C26T3:1:1107:18193:24982	Homo	158	genus	95.9565	2		Homo	9605	9605	genus	Homo	9604	family	Hominidae	9443	order	Primates	40674	class	Mammalia	7711	phylum	Chordata
C26T3:1:1107:19328:9876	Homo	158	genus	98	4		Homo	9605	9605	genus	Homo	9604	family	Hominidae	9443	order	Primates	40674	class	Mammalia	7711	phylum	Chordata
C26T3:1:1109:17563:17720	Homo	158	genus	97.2174	34		Homo	9605	9605	genus	Homo	9604	family	Hominidae	9443	order	Primates	40674	class	Mammalia	7711	phylum	Chordata
C26T3:1:1111:12877:14030	Homo	158	genus	95.36	2		Homo	9605	9605	genus	Homo	9604	family	Hominidae	9443	order	Primates	40674	class	Mammalia	7711	phylum	Chordata
C26T3:1:2102:11951:18147	Homo	158	genus	96.6	3		Homo	9605	9605	genus	Homo	9604	family	Hominidae	9443	order	Primates	40674	class	Mammalia	7711	phylum	Chordata
C26T3:1:2105:13026:2257	Homo	158	genus	95.36	2		Homo	9605	9605	genus	Homo	9604	family	Hominidae	9443	order	Primates	40674	class	Mammalia	7711	phylum	Chordata
C26T3:1:2110:14052:6913	Homo	158	genus	95.36	2		Homo	9605	9605	genus	Homo	9604	family	Hominidae	9443	order	Primates	40674	class	Mammalia	7711	phylum	Chordata
C26T3:1:2110:20345:24590	Homo	158	genus	95.6957	13		Homo	9605	9605	genus	Homo	9604	family	Hominidae	9443	order	Primates	40674	class	Mammalia	7711	phylum	Chordata
C26T3:1:1101:19397:14973	Homo	156	genus	95	2		Homo	9605	9605	genus	Homo	9604	family	Hominidae	9443	order	Primates	40674	class	Mammalia	7711	phylum	Chordata
C26T3:1:1104:13653:15107	Homo	156	genus	95	42		Homo	9605	9605	genus	Homo	9604	family	Hominidae	9443	order	Primates	40674	class	Mammalia	7711	phylum	Chordata
C26T3:1:1111:12256:7694	Homo	156	genus	95	2		Homo	9605	9605	genus	Homo	9604	family	Hominidae	9443	order	Primates	40674	class	Mammalia	7711	phylum	Chordata
C26T3:1:2101:22652:24466	Homo	156	genus	98.1739	2		Homo	9605	9605	genus	Homo	9604	family	Hominidae	9443	order	Primates	40674	class	Mammalia	7711	phylum	Chordata
C26T3:1:1101:25225:4946	Homo	154	genus	97.28	2		Homo	9605	9605	genus	Homo	9604	family	Hominidae	9443	order	Primates	40674	class	Mammalia	7711	phylum	Chordata
C26T3:1:1102:5855:5324	Homo	154	genus	98	3		Homo	9605	9605	genus	Homo	9604	family	Hominidae	9443	order	Primates	40674	class	Mammalia	7711	phylum	Chordata
C26T3:1:1104:25363:22493	Homo	154	genus	98.1739	4		Homo	9605	9605	genus	Homo	9604	family	Hominidae	9443	order	Primates	40674	class	Mammalia	7711	phylum	Chordata
C26T3:1:1105:26318:9052	Homo	154	genus	97.6667	2		Homo	9605	9605	genus	Homo	9604	family	Hominidae	9443	order	Primates	40674	class	Mammalia	7711	phylum	Chordata
C26T3:1:1110:13386:4541	Homo	154	genus	98	2		Homo	9605	9605	genus	Homo	9604	family	Hominidae	9443	order	Primates	40674	class	Mammalia	7711	phylum	Chordata
C26T3:1:1106:23084:6222	Homo	152	genus	95	3		Homo	9605	9605	genus	Homo	9604	family	Hominidae	9443	order	Primates	40674	class	Mammalia	7711	phylum	Chordata
C26T3:1:2106:22511:13648	Homo	152	genus	97.1739	2		Homo	9605	9605	genus	Homo	9604	family	Hominidae	9443	order	Primates	40674	class	Mammalia	7711	phylum	Chordata
C26T3:1:1113:12653:2627	Homo	150	genus	97.52	2		Homo	9605	9605	genus	Homo	9604	family	Hominidae	9443	order	Primates	40674	class	Mammalia	7711	phylum	Chordata
C26T3:1:1109:19083:6755	Homo sapiens	209	species	98.16	2		Homo sapiens	9606	9606	species	Homo sapiens	9605	genus	Homo	9604	family	Hominidae	9443	order	Primates	40674	class	Mammalia	7711	phylum	Chordata
C26T3:1:1104:18115:16861	Homo sapiens	207	species	98	7		Homo sapiens	9606	9606	species	Homo sapiens	9605	genus	Homo	9604	family	Hominidae	9443	order	Primates	40674	class	Mammalia	7711	phylum	Chordata
C26T3:1:1101:19947:1366	Homo sapiens	206	species	98	13		Homo sapiens	9606	9606	species	Homo sapiens	9605	genus	Homo	9604	family	Hominidae	9443	order	Primates	40674	class	Mammalia	7711	phylum	Chordata
C26T3:1:1109:10001:5402	Homo sapiens	206	species	98	2		Homo sapiens	9606	9606	species	Homo sapiens	9605	genus	Homo	9604	family	Hominidae	9443	order	Primates	40674	class	Mammalia	7711	phylum	Chordata
C26T3:1:2102:12978:23927	Homo sapiens	206	species	98	4		Homo sapiens	9606	9606	species	Homo sapiens	9605	genus	Homo	9604	family	Hominidae	9443	order	Primates	40674	class	Mammalia	7711	phylum	Chordata
C26T3:1:2103:24490:6530	Homo sapiens	204	species	98	3		Homo sapiens	9606	9606	species	Homo sapiens	9605	genus	Homo	9604	family	Hominidae	9443	order	Primates	40674	class	Mammalia	7711	phylum	Chordata
C26T3:1:1110:9966:10149	Homo sapiens	202	species	97	2		Homo sapiens	9606	9606	species	Homo sapiens	9605	genus	Homo	9604	family	Hominidae	9443	order	Primates	40674	class	Mammalia	7711	phylum	Chordata
C26T3:1:2102:25235:5430	Homo sapiens	202	species	98	7		Homo sapiens	9606	9606	species	Homo sapiens	9605	genus	Homo	9604	family	Hominidae	9443	order	Primates	40674	class	Mammalia	7711	phylum	Chordata
C26T3:1:1101:2834:16701	Homo sapiens	200	species	97	3		Homo sapiens	9606	9606	species	Homo sapiens	9605	genus	Homo	9604	family	Hominidae	9443	order	Primates	40674	class	Mammalia	7711	phylum	Chordata
C26T3:1:1102:24727:17664	Homo sapiens	200	species	97	4		Homo sapiens	9606	9606	species	Homo sapiens	9605	genus	Homo	9604	family	Hominidae	9443	order	Primates	40674	class	Mammalia	7711	phylum	Chordata
C26T3:1:1101:24539:10094	Homo sapiens	196	species	97	9		Homo sapiens	9606	9606	species	Homo sapiens	9605	genus	Homo	9604	family	Hominidae	9443	order	Primates	40674	class	Mammalia	7711	phylum	Chordata
C26T3:1:1119:15961:17122	Homo sapiens	195	species	97.24	2		Homo sapiens	9606	9606	species	Homo sapiens	9605	genus	Homo	9604	family	Hominidae	9443	order	Primates	40674	class	Mammalia	7711	phylum	Chordata
C26T3:1:1119:19598:10611	Homo sapiens	195	species	97.24	3		Homo sapiens	9606	9606	species	Homo sapiens	9605	genus	Homo	9604	family	Hominidae	9443	order	Primates	40674	class	Mammalia	7711	phylum	Chordata
C26T3:1:1101:3148:17827	Homo sapiens	193	species	97	5		Homo sapiens	9606	9606	species	Homo sapiens	9605	genus	Homo	9604	family	Hominidae	9443	order	Primates	40674	class	Mammalia	7711	phylum	Chordata
C26T3:1:2105:3752:7278	Homo sapiens	191	species	97	2		Homo sapiens	9606	9606	species	Homo sapiens	9605	genus	Homo	9604	family	Hominidae	9443	order	Primates	40674	class	Mammalia	7711	phylum	Chordata
C26T3:1:1112:22590:19744	Homo sapiens	189	species	99	5		Homo sapiens	9606	9606	species	Homo sapiens	9605	genus	Homo	9604	family	Hominidae	9443	order	Primates	40674	class	Mammalia	7711	phylum	Chordata
C26T3:1:1108:6081:20059	Homo sapiens	185	species	98.3529	8		Homo sapiens	9606	9606	species	Homo sapiens	9605	genus	Homo	9604	family	Hominidae	9443	order	Primates	40674	class	Mammalia	7711	phylum	Chordata
C26T3:1:2103:28314:15102	Homo sapiens	185	species	98	2		Homo sapiens	9606	9606	species	Homo sapiens	9605	genus	Homo	9604	family	Hominidae	9443	order	Primates	40674	class	Mammalia	7711	phylum	Chordata
C26T3:1:1101:3701:13351	Homo sapiens	182	species	99	4		Homo sapiens	9606	9606	species	Homo sapiens	9605	genus	Homo	9604	family	Hominidae	9443	order	Primates	40674	class	Mammalia	7711	phylum	Chordata
C26T3:1:1101:10029:4106	Homo sapiens	180	species	99	665		Homo sapiens	9606	9606	species	Homo sapiens	9605	genus	Homo	9604	family	Hominidae	9443	order	Primates	40674	class	Mammalia	7711	phylum	Chordata
C26T3:1:1104:10887:3209	Homo sapiens	180	species	98	2		Homo sapiens	9606	9606	species	Homo sapiens	9605	genus	Homo	9604	family	Hominidae	9443	order	Primates	40674	class	Mammalia	7711	phylum	Chordata
C26T3:1:1101:8141:15106	Homo sapiens	178	species	99	47		Homo sapiens	9606	9606	species	Homo sapiens	9605	genus	Homo	9604	family	Hominidae	9443	order	Primates	40674	class	Mammalia	7711	phylum	Chordata
C26T3:1:2103:23390:17871	Homo sapiens	176	species	98	2		Homo sapiens	9606	9606	species	Homo sapiens	9605	genus	Homo	9604	family	Hominidae	9443	order	Primates	40674	class	Mammalia	7711	phylum	Chordata
C26T3:1:1101:20901:21275	Homo sapiens	174	species	98	18		Homo sapiens	9606	9606	species	Homo sapiens	9605	genus	Homo	9604	family	Hominidae	9443	order	Primates	40674	class	Mammalia	7711	phylum	Chordata
C26T3:1:1104:5145:9014	Homo sapiens	172	species	98	9		Homo sapiens	9606	9606	species	Homo sapiens	9605	genus	Homo	9604	family	Hominidae	9443	order	Primates	40674	class	Mammalia	7711	phylum	Chordata
C26T3:1:2103:28134:19018	Homo sapiens	172	species	98	2		Homo sapiens	9606	9606	species	Homo sapiens	9605	genus	Homo	9604	family	Hominidae	9443	order	Primates	40674	class	Mammalia	7711	phylum	Chordata
C26T3:1:1102:6345:9671	Homo sapiens	171	species	98	134		Homo sapiens	9606	9606	species	Homo sapiens	9605	genus	Homo	9604	family	Hominidae	9443	order	Primates	40674	class	Mammalia	7711	phylum	Chordata
C26T3:1:1109:5659:22305	Homo sapiens	171	species	98	33		Homo sapiens	9606	9606	species	Homo sapiens	9605	genus	Homo	9604	family	Hominidae	9443	order	Primates	40674	class	Mammalia	7711	phylum	Chordata
C26T3:1:1115:18104:16427	Homo sapiens	171	species	99	166		Homo sapiens	9606	9606	species	Homo sapiens	9605	genus	Homo	9604	family	Hominidae	9443	order	Primates	40674	class	Mammalia	7711	phylum	Chordata
C26T3:1:2103:14995:13462	Homo sapiens	171	species	99.1739	23		Homo sapiens	9606	9606	species	Homo sapiens	9605	genus	Homo	9604	family	Hominidae	9443	order	Primates	40674	class	Mammalia	7711	phylum	Chordata
C26T3:1:1110:24112:1997	Homo sapiens	169	species	97	4		Homo sapiens	9606	9606	species	Homo sapiens	9605	genus	Homo	9604	family	Hominidae	9443	order	Primates	40674	class	Mammalia	7711	phylum	Chordata
C26T3:1:1118:11458:17408	Homo sapiens	169	species	97	2		Homo sapiens	9606	9606	species	Homo sapiens	9605	genus	Homo	9604	family	Hominidae	9443	order	Primates	40674	class	Mammalia	7711	phylum	Chordata
C26T3:1:2101:19927:5567	Homo sapiens	169	species	97	4		Homo sapiens	9606	9606	species	Homo sapiens	9605	genus	Homo	9604	family	Hominidae	9443	order	Primates	40674	class	Mammalia	7711	phylum	Chordata
C26T3:1:1101:10017:11243	Homo sapiens	167	species	97.24	59		Homo sapiens	9606	9606	species	Homo sapiens	9605	genus	Homo	9604	family	Hominidae	9443	order	Primates	40674	class	Mammalia	7711	phylum	Chordata
C26T3:1:1101:11878:21213	Homo sapiens	167	species	99	62		Homo sapiens	9606	9606	species	Homo sapiens	9605	genus	Homo	9604	family	Hominidae	9443	order	Primates	40674	class	Mammalia	7711	phylum	Chordata
C26T3:1:1101:16688:19208	Homo sapiens	167	species	97	52		Homo sapiens	9606	9606	species	Homo sapiens	9605	genus	Homo	9604	family	Hominidae	9443	order	Primates	40674	class	Mammalia	7711	phylum	Chordata
C26T3:1:1101:27362:10293	Homo sapiens	167	species	97.68	45		Homo sapiens	9606	9606	species	Homo sapiens	9605	genus	Homo	9604	family	Hominidae	9443	order	Primates	40674	class	Mammalia	7711	phylum	Chordata
C26T3:1:1104:16043:13457	Homo sapiens	167	species	98	10		Homo sapiens	9606	9606	species	Homo sapiens	9605	genus	Homo	9604	family	Hominidae	9443	order	Primates	40674	class	Mammalia	7711	phylum	Chordata
C26T3:1:2103:21207:10873	Homo sapiens	167	species	97.32	5		Homo sapiens	9606	9606	species	Homo sapiens	9605	genus	Homo	9604	family	Hominidae	9443	order	Primates	40674	class	Mammalia	7711	phylum	Chordata
C26T3:1:2113:8626:7940	Homo sapiens	167	species	97	3		Homo sapiens	9606	9606	species	Homo sapiens	9605	genus	Homo	9604	family	Hominidae	9443	order	Primates	40674	class	Mammalia	7711	phylum	Chordata
C26T3:1:1101:10120:12006	Homo sapiens	165	species	97	511		Homo sapiens	9606	9606	species	Homo sapiens	9605	genus	Homo	9604	family	Hominidae	9443	order	Primates	40674	class	Mammalia	7711	phylum	Chordata
C26T3:1:1101:22831:1758	Homo sapiens	165	species	99.1739	28		Homo sapiens	9606	9606	species	Homo sapiens	9605	genus	Homo	9604	family	Hominidae	9443	order	Primates	40674	class	Mammalia	7711	phylum	Chordata
C26T3:1:1103:10161:6537	Homo sapiens	165	species	97	6		Homo sapiens	9606	9606	species	Homo sapiens	9605	genus	Homo	9604	family	Hominidae	9443	order	Primates	40674	class	Mammalia	7711	phylum	Chordata
C26T3:1:1107:25967:7722	Homo sapiens	165	species	97	2		Homo sapiens	9606	9606	species	Homo sapiens	9605	genus	Homo	9604	family	Hominidae	9443	order	Primates	40674	class	Mammalia	7711	phylum	Chordata
C26T3:1:1108:19384:10073	Homo sapiens	165	species	97.48	122		Homo sapiens	9606	9606	species	Homo sapiens	9605	genus	Homo	9604	family	Hominidae	9443	order	Primates	40674	class	Mammalia	7711	phylum	Chordata
C26T3:1:1113:6274:20235	Hybopsis zanema	171	species	97.3333	3		Hybopsis zanema	114515	114515	species	Hybopsis zanema	87727	genus	Hybopsis	7953	family	Cyprinidae	7952	order	Cypriniformes	186623	class	Actinopteri	7711	phylum	Chordata
C26T3:1:1109:8966:3631	Hybopsis zanema	169	species	97	31		Hybopsis zanema	114515	114515	species	Hybopsis zanema	87727	genus	Hybopsis	7953	family	Cyprinidae	7952	order	Cypriniformes	186623	class	Actinopteri	7711	phylum	Chordata
C26T3:1:1101:15009:1519	Hypentelium nigricans	195	species	97	59		Hypentelium nigricans	61316	61316	species	Hypentelium nigricans	61315	genus	Hypentelium	7968	family	Catostomidae	7952	order	Cypriniformes	186623	class	Actinopteri	7711	phylum	Chordata
C26T3:1:1101:16152:24866	Hypentelium nigricans	195	species	98	23		Hypentelium nigricans	61316	61316	species	Hypentelium nigricans	61315	genus	Hypentelium	7968	family	Catostomidae	7952	order	Cypriniformes	186623	class	Actinopteri	7711	phylum	Chordata
C26T3:1:1105:29702:13842	Hypentelium nigricans	195	species	99	5		Hypentelium nigricans	61316	61316	species	Hypentelium nigricans	61315	genus	Hypentelium	7968	family	Catostomidae	7952	order	Cypriniformes	186623	class	Actinopteri	7711	phylum	Chordata
C26T3:1:1106:15731:14357	Hypentelium nigricans	195	species	97	2		Hypentelium nigricans	61316	61316	species	Hypentelium nigricans	61315	genus	Hypentelium	7968	family	Catostomidae	7952	order	Cypriniformes	186623	class	Actinopteri	7711	phylum	Chordata
C26T3:1:1109:25614:12868	Hypentelium nigricans	195	species	97	5		Hypentelium nigricans	61316	61316	species	Hypentelium nigricans	61315	genus	Hypentelium	7968	family	Catostomidae	7952	order	Cypriniformes	186623	class	Actinopteri	7711	phylum	Chordata
C26T3:1:1119:16209:9133	Hypentelium nigricans	195	species	97	2		Hypentelium nigricans	61316	61316	species	Hypentelium nigricans	61315	genus	Hypentelium	7968	family	Catostomidae	7952	order	Cypriniformes	186623	class	Actinopteri	7711	phylum	Chordata
C26T3:1:1101:12085:2662	Hypentelium nigricans	193	species	99	10		Hypentelium nigricans	61316	61316	species	Hypentelium nigricans	61315	genus	Hypentelium	7968	family	Catostomidae	7952	order	Cypriniformes	186623	class	Actinopteri	7711	phylum	Chordata
C26T3:1:1107:26944:5576	Hypentelium nigricans	193	species	97	5		Hypentelium nigricans	61316	61316	species	Hypentelium nigricans	61315	genus	Hypentelium	7968	family	Catostomidae	7952	order	Cypriniformes	186623	class	Actinopteri	7711	phylum	Chordata
C26T3:1:1102:27353:20065	Hypentelium nigricans	191	species	97	5		Hypentelium nigricans	61316	61316	species	Hypentelium nigricans	61315	genus	Hypentelium	7968	family	Catostomidae	7952	order	Cypriniformes	186623	class	Actinopteri	7711	phylum	Chordata
C26T3:1:1104:25007:3807	Hypentelium nigricans	191	species	99	12		Hypentelium nigricans	61316	61316	species	Hypentelium nigricans	61315	genus	Hypentelium	7968	family	Catostomidae	7952	order	Cypriniformes	186623	class	Actinopteri	7711	phylum	Chordata
C26T3:1:1108:5763:8545	Hypentelium nigricans	191	species	97	4		Hypentelium nigricans	61316	61316	species	Hypentelium nigricans	61315	genus	Hypentelium	7968	family	Catostomidae	7952	order	Cypriniformes	186623	class	Actinopteri	7711	phylum	Chordata
C26T3:1:1110:25193:4132	Hypentelium nigricans	191	species	97	2		Hypentelium nigricans	61316	61316	species	Hypentelium nigricans	61315	genus	Hypentelium	7968	family	Catostomidae	7952	order	Cypriniformes	186623	class	Actinopteri	7711	phylum	Chordata
C26T3:1:1114:20106:12999	Hypentelium nigricans	191	species	99	3		Hypentelium nigricans	61316	61316	species	Hypentelium nigricans	61315	genus	Hypentelium	7968	family	Catostomidae	7952	order	Cypriniformes	186623	class	Actinopteri	7711	phylum	Chordata
C26T3:1:1114:3689:18413	Hypentelium nigricans	191	species	97	5		Hypentelium nigricans	61316	61316	species	Hypentelium nigricans	61315	genus	Hypentelium	7968	family	Catostomidae	7952	order	Cypriniformes	186623	class	Actinopteri	7711	phylum	Chordata
C26T3:1:2101:22249:6677	Hypentelium nigricans	191	species	97	6		Hypentelium nigricans	61316	61316	species	Hypentelium nigricans	61315	genus	Hypentelium	7968	family	Catostomidae	7952	order	Cypriniformes	186623	class	Actinopteri	7711	phylum	Chordata
C26T3:1:1109:5519:20123	Hypentelium nigricans	189	species	99	2		Hypentelium nigricans	61316	61316	species	Hypentelium nigricans	61315	genus	Hypentelium	7968	family	Catostomidae	7952	order	Cypriniformes	186623	class	Actinopteri	7711	phylum	Chordata
C26T3:1:1103:4142:15312	Hypentelium nigricans	182	species	97	15		Hypentelium nigricans	61316	61316	species	Hypentelium nigricans	61315	genus	Hypentelium	7968	family	Catostomidae	7952	order	Cypriniformes	186623	class	Actinopteri	7711	phylum	Chordata
C26T3:1:1109:3340:18928	Hypentelium nigricans	182	species	97	6		Hypentelium nigricans	61316	61316	species	Hypentelium nigricans	61315	genus	Hypentelium	7968	family	Catostomidae	7952	order	Cypriniformes	186623	class	Actinopteri	7711	phylum	Chordata
C26T3:1:1116:24245:2934	Hypentelium nigricans	182	species	98	2		Hypentelium nigricans	61316	61316	species	Hypentelium nigricans	61315	genus	Hypentelium	7968	family	Catostomidae	7952	order	Cypriniformes	186623	class	Actinopteri	7711	phylum	Chordata
C26T3:1:2106:17308:15898	Hypentelium nigricans	182	species	98	2		Hypentelium nigricans	61316	61316	species	Hypentelium nigricans	61315	genus	Hypentelium	7968	family	Catostomidae	7952	order	Cypriniformes	186623	class	Actinopteri	7711	phylum	Chordata
C26T3:1:2107:10164:24705	Hypentelium nigricans	182	species	99	6		Hypentelium nigricans	61316	61316	species	Hypentelium nigricans	61315	genus	Hypentelium	7968	family	Catostomidae	7952	order	Cypriniformes	186623	class	Actinopteri	7711	phylum	Chordata
C26T3:1:2114:19373:2067	Hypentelium nigricans	182	species	100	3		Hypentelium nigricans	61316	61316	species	Hypentelium nigricans	61315	genus	Hypentelium	7968	family	Catostomidae	7952	order	Cypriniformes	186623	class	Actinopteri	7711	phylum	Chordata
C26T3:1:1103:7904:24491	Hypentelium nigricans	180	species	99	10		Hypentelium nigricans	61316	61316	species	Hypentelium nigricans	61315	genus	Hypentelium	7968	family	Catostomidae	7952	order	Cypriniformes	186623	class	Actinopteri	7711	phylum	Chordata
C26T3:1:1117:19527:1216	Hypentelium nigricans	180	species	97	2		Hypentelium nigricans	61316	61316	species	Hypentelium nigricans	61315	genus	Hypentelium	7968	family	Catostomidae	7952	order	Cypriniformes	186623	class	Actinopteri	7711	phylum	Chordata
C26T3:1:2118:18567:7672	Hypentelium nigricans	180	species	97	2		Hypentelium nigricans	61316	61316	species	Hypentelium nigricans	61315	genus	Hypentelium	7968	family	Catostomidae	7952	order	Cypriniformes	186623	class	Actinopteri	7711	phylum	Chordata
C26T3:1:1101:12705:15461	Hypentelium nigricans	178	species	99	60		Hypentelium nigricans	61316	61316	species	Hypentelium nigricans	61315	genus	Hypentelium	7968	family	Catostomidae	7952	order	Cypriniformes	186623	class	Actinopteri	7711	phylum	Chordata
C26T3:1:1101:17890:5714	Hypentelium nigricans	178	species	97	39		Hypentelium nigricans	61316	61316	species	Hypentelium nigricans	61315	genus	Hypentelium	7968	family	Catostomidae	7952	order	Cypriniformes	186623	class	Actinopteri	7711	phylum	Chordata
C26T3:1:1101:26439:8645	Hypentelium nigricans	178	species	98	7		Hypentelium nigricans	61316	61316	species	Hypentelium nigricans	61315	genus	Hypentelium	7968	family	Catostomidae	7952	order	Cypriniformes	186623	class	Actinopteri	7711	phylum	Chordata
C26T3:1:1105:28054:18040	Hypentelium nigricans	178	species	99	4		Hypentelium nigricans	61316	61316	species	Hypentelium nigricans	61315	genus	Hypentelium	7968	family	Catostomidae	7952	order	Cypriniformes	186623	class	Actinopteri	7711	phylum	Chordata
C26T3:1:1113:10308:24913	Hypentelium nigricans	178	species	100	5		Hypentelium nigricans	61316	61316	species	Hypentelium nigricans	61315	genus	Hypentelium	7968	family	Catostomidae	7952	order	Cypriniformes	186623	class	Actinopteri	7711	phylum	Chordata
C26T3:1:2104:20861:4168	Hypentelium nigricans	178	species	99	4		Hypentelium nigricans	61316	61316	species	Hypentelium nigricans	61315	genus	Hypentelium	7968	family	Catostomidae	7952	order	Cypriniformes	186623	class	Actinopteri	7711	phylum	Chordata
C26T3:1:1101:12555:6838	Hypentelium nigricans	171	species	98	5		Hypentelium nigricans	61316	61316	species	Hypentelium nigricans	61315	genus	Hypentelium	7968	family	Catostomidae	7952	order	Cypriniformes	186623	class	Actinopteri	7711	phylum	Chordata
C26T3:1:1101:14682:5051	Hypentelium nigricans	171	species	100	206		Hypentelium nigricans	61316	61316	species	Hypentelium nigricans	61315	genus	Hypentelium	7968	family	Catostomidae	7952	order	Cypriniformes	186623	class	Actinopteri	7711	phylum	Chordata
C26T3:1:1101:16765:12672	Hypentelium nigricans	171	species	100	97		Hypentelium nigricans	61316	61316	species	Hypentelium nigricans	61315	genus	Hypentelium	7968	family	Catostomidae	7952	order	Cypriniformes	186623	class	Actinopteri	7711	phylum	Chordata
C26T3:1:1101:27745:9130	Hypentelium nigricans	171	species	100	14		Hypentelium nigricans	61316	61316	species	Hypentelium nigricans	61315	genus	Hypentelium	7968	family	Catostomidae	7952	order	Cypriniformes	186623	class	Actinopteri	7711	phylum	Chordata
C26T3:1:1101:27792:19828	Hypentelium nigricans	171	species	97	3		Hypentelium nigricans	61316	61316	species	Hypentelium nigricans	61315	genus	Hypentelium	7968	family	Catostomidae	7952	order	Cypriniformes	186623	class	Actinopteri	7711	phylum	Chordata
C26T3:1:1104:10652:23248	Hypentelium nigricans	171	species	100	6		Hypentelium nigricans	61316	61316	species	Hypentelium nigricans	61315	genus	Hypentelium	7968	family	Catostomidae	7952	order	Cypriniformes	186623	class	Actinopteri	7711	phylum	Chordata
C26T3:1:1105:11062:8455	Hypentelium nigricans	171	species	99	3		Hypentelium nigricans	61316	61316	species	Hypentelium nigricans	61315	genus	Hypentelium	7968	family	Catostomidae	7952	order	Cypriniformes	186623	class	Actinopteri	7711	phylum	Chordata
C26T3:1:1105:13510:17069	Hypentelium nigricans	171	species	97	2		Hypentelium nigricans	61316	61316	species	Hypentelium nigricans	61315	genus	Hypentelium	7968	family	Catostomidae	7952	order	Cypriniformes	186623	class	Actinopteri	7711	phylum	Chordata
C26T3:1:1105:13891:23743	Hypentelium nigricans	171	species	100	4		Hypentelium nigricans	61316	61316	species	Hypentelium nigricans	61315	genus	Hypentelium	7968	family	Catostomidae	7952	order	Cypriniformes	186623	class	Actinopteri	7711	phylum	Chordata
C26T3:1:1105:5268:10113	Hypentelium nigricans	171	species	98	2		Hypentelium nigricans	61316	61316	species	Hypentelium nigricans	61315	genus	Hypentelium	7968	family	Catostomidae	7952	order	Cypriniformes	186623	class	Actinopteri	7711	phylum	Chordata
C26T3:1:1105:8778:22051	Hypentelium nigricans	171	species	98	2		Hypentelium nigricans	61316	61316	species	Hypentelium nigricans	61315	genus	Hypentelium	7968	family	Catostomidae	7952	order	Cypriniformes	186623	class	Actinopteri	7711	phylum	Chordata
C26T3:1:1106:19542:5376	Hypentelium nigricans	171	species	98	4		Hypentelium nigricans	61316	61316	species	Hypentelium nigricans	61315	genus	Hypentelium	7968	family	Catostomidae	7952	order	Cypriniformes	186623	class	Actinopteri	7711	phylum	Chordata
C26T3:1:1111:3387:13457	Hypentelium nigricans	171	species	98	5		Hypentelium nigricans	61316	61316	species	Hypentelium nigricans	61315	genus	Hypentelium	7968	family	Catostomidae	7952	order	Cypriniformes	186623	class	Actinopteri	7711	phylum	Chordata
C26T3:1:1115:26937:20832	Hypentelium nigricans	171	species	98	3		Hypentelium nigricans	61316	61316	species	Hypentelium nigricans	61315	genus	Hypentelium	7968	family	Catostomidae	7952	order	Cypriniformes	186623	class	Actinopteri	7711	phylum	Chordata
C26T3:1:1118:2339:9296	Hypentelium nigricans	171	species	99	2		Hypentelium nigricans	61316	61316	species	Hypentelium nigricans	61315	genus	Hypentelium	7968	family	Catostomidae	7952	order	Cypriniformes	186623	class	Actinopteri	7711	phylum	Chordata
C26T3:1:2101:5144:21106	Hypentelium nigricans	171	species	99	2		Hypentelium nigricans	61316	61316	species	Hypentelium nigricans	61315	genus	Hypentelium	7968	family	Catostomidae	7952	order	Cypriniformes	186623	class	Actinopteri	7711	phylum	Chordata
C26T3:1:2105:18160:13621	Hypentelium nigricans	171	species	100	7		Hypentelium nigricans	61316	61316	species	Hypentelium nigricans	61315	genus	Hypentelium	7968	family	Catostomidae	7952	order	Cypriniformes	186623	class	Actinopteri	7711	phylum	Chordata
C26T3:1:2106:25434:7602	Hypentelium nigricans	171	species	98	6		Hypentelium nigricans	61316	61316	species	Hypentelium nigricans	61315	genus	Hypentelium	7968	family	Catostomidae	7952	order	Cypriniformes	186623	class	Actinopteri	7711	phylum	Chordata
C26T3:1:1101:19369:13610	Hypentelium nigricans	169	species	99	8		Hypentelium nigricans	61316	61316	species	Hypentelium nigricans	61315	genus	Hypentelium	7968	family	Catostomidae	7952	order	Cypriniformes	186623	class	Actinopteri	7711	phylum	Chordata
C26T3:1:1102:20442:24690	Hypentelium nigricans	169	species	99	11		Hypentelium nigricans	61316	61316	species	Hypentelium nigricans	61315	genus	Hypentelium	7968	family	Catostomidae	7952	order	Cypriniformes	186623	class	Actinopteri	7711	phylum	Chordata
C26T3:1:1103:16990:15949	Hypentelium nigricans	169	species	99	12		Hypentelium nigricans	61316	61316	species	Hypentelium nigricans	61315	genus	Hypentelium	7968	family	Catostomidae	7952	order	Cypriniformes	186623	class	Actinopteri	7711	phylum	Chordata
C26T3:1:1103:9905:9140	Hypentelium nigricans	169	species	97	4927		Hypentelium nigricans	61316	61316	species	Hypentelium nigricans	61315	genus	Hypentelium	7968	family	Catostomidae	7952	order	Cypriniformes	186623	class	Actinopteri	7711	phylum	Chordata
C26T3:1:1104:23197:9886	Hypentelium nigricans	169	species	99	3		Hypentelium nigricans	61316	61316	species	Hypentelium nigricans	61315	genus	Hypentelium	7968	family	Catostomidae	7952	order	Cypriniformes	186623	class	Actinopteri	7711	phylum	Chordata
C26T3:1:1115:14673:24075	Hypentelium nigricans	169	species	100	2		Hypentelium nigricans	61316	61316	species	Hypentelium nigricans	61315	genus	Hypentelium	7968	family	Catostomidae	7952	order	Cypriniformes	186623	class	Actinopteri	7711	phylum	Chordata
C26T3:1:2101:10877:4818	Hypentelium nigricans	169	species	99	4		Hypentelium nigricans	61316	61316	species	Hypentelium nigricans	61315	genus	Hypentelium	7968	family	Catostomidae	7952	order	Cypriniformes	186623	class	Actinopteri	7711	phylum	Chordata
C26T3:1:2105:16201:14131	Hypentelium nigricans	169	species	99	3		Hypentelium nigricans	61316	61316	species	Hypentelium nigricans	61315	genus	Hypentelium	7968	family	Catostomidae	7952	order	Cypriniformes	186623	class	Actinopteri	7711	phylum	Chordata
C26T3:1:1101:18602:21032	Hypentelium nigricans	167	species	100	2		Hypentelium nigricans	61316	61316	species	Hypentelium nigricans	61315	genus	Hypentelium	7968	family	Catostomidae	7952	order	Cypriniformes	186623	class	Actinopteri	7711	phylum	Chordata
C26T3:1:1101:18769:10225	Hypentelium nigricans	167	species	99	426		Hypentelium nigricans	61316	61316	species	Hypentelium nigricans	61315	genus	Hypentelium	7968	family	Catostomidae	7952	order	Cypriniformes	186623	class	Actinopteri	7711	phylum	Chordata
C26T3:1:1101:2652:12546	Hypentelium nigricans	167	species	97	3		Hypentelium nigricans	61316	61316	species	Hypentelium nigricans	61315	genus	Hypentelium	7968	family	Catostomidae	7952	order	Cypriniformes	186623	class	Actinopteri	7711	phylum	Chordata
C26T3:1:1101:3656:9584	Hypentelium nigricans	167	species	97	3		Hypentelium nigricans	61316	61316	species	Hypentelium nigricans	61315	genus	Hypentelium	7968	family	Catostomidae	7952	order	Cypriniformes	186623	class	Actinopteri	7711	phylum	Chordata
C26T3:1:1102:11587:21719	Hypentelium nigricans	167	species	100	3		Hypentelium nigricans	61316	61316	species	Hypentelium nigricans	61315	genus	Hypentelium	7968	family	Catostomidae	7952	order	Cypriniformes	186623	class	Actinopteri	7711	phylum	Chordata
C26T3:1:1102:12114:20237	Hypentelium nigricans	167	species	97	12		Hypentelium nigricans	61316	61316	species	Hypentelium nigricans	61315	genus	Hypentelium	7968	family	Catostomidae	7952	order	Cypriniformes	186623	class	Actinopteri	7711	phylum	Chordata
C26T3:1:1102:13290:17201	Hypentelium nigricans	167	species	98	6		Hypentelium nigricans	61316	61316	species	Hypentelium nigricans	61315	genus	Hypentelium	7968	family	Catostomidae	7952	order	Cypriniformes	186623	class	Actinopteri	7711	phylum	Chordata
C26T3:1:1102:8198:19878	Hypentelium nigricans	167	species	97	2		Hypentelium nigricans	61316	61316	species	Hypentelium nigricans	61315	genus	Hypentelium	7968	family	Catostomidae	7952	order	Cypriniformes	186623	class	Actinopteri	7711	phylum	Chordata
C26T3:1:1103:4754:21688	Hypentelium nigricans	167	species	97	2		Hypentelium nigricans	61316	61316	species	Hypentelium nigricans	61315	genus	Hypentelium	7968	family	Catostomidae	7952	order	Cypriniformes	186623	class	Actinopteri	7711	phylum	Chordata
C26T3:1:1104:20069:23144	Hypentelium nigricans	167	species	97	2		Hypentelium nigricans	61316	61316	species	Hypentelium nigricans	61315	genus	Hypentelium	7968	family	Catostomidae	7952	order	Cypriniformes	186623	class	Actinopteri	7711	phylum	Chordata
C26T3:1:1104:28656:8480	Hypentelium nigricans	167	species	97	2		Hypentelium nigricans	61316	61316	species	Hypentelium nigricans	61315	genus	Hypentelium	7968	family	Catostomidae	7952	order	Cypriniformes	186623	class	Actinopteri	7711	phylum	Chordata
C26T3:1:1104:4754:6191	Hypentelium nigricans	167	species	97	2		Hypentelium nigricans	61316	61316	species	Hypentelium nigricans	61315	genus	Hypentelium	7968	family	Catostomidae	7952	order	Cypriniformes	186623	class	Actinopteri	7711	phylum	Chordata
C26T3:1:1106:3005:12878	Hypentelium nigricans	167	species	97	3		Hypentelium nigricans	61316	61316	species	Hypentelium nigricans	61315	genus	Hypentelium	7968	family	Catostomidae	7952	order	Cypriniformes	186623	class	Actinopteri	7711	phylum	Chordata
C26T3:1:1106:6350:8425	Hypentelium nigricans	167	species	98	2		Hypentelium nigricans	61316	61316	species	Hypentelium nigricans	61315	genus	Hypentelium	7968	family	Catostomidae	7952	order	Cypriniformes	186623	class	Actinopteri	7711	phylum	Chordata
C26T3:1:1107:25714:5927	Hypentelium nigricans	167	species	97	3		Hypentelium nigricans	61316	61316	species	Hypentelium nigricans	61315	genus	Hypentelium	7968	family	Catostomidae	7952	order	Cypriniformes	186623	class	Actinopteri	7711	phylum	Chordata
C26T3:1:1107:7759:6729	Hypentelium nigricans	167	species	99	4		Hypentelium nigricans	61316	61316	species	Hypentelium nigricans	61315	genus	Hypentelium	7968	family	Catostomidae	7952	order	Cypriniformes	186623	class	Actinopteri	7711	phylum	Chordata
C26T3:1:1108:10070:23479	Hypentelium nigricans	167	species	97	6		Hypentelium nigricans	61316	61316	species	Hypentelium nigricans	61315	genus	Hypentelium	7968	family	Catostomidae	7952	order	Cypriniformes	186623	class	Actinopteri	7711	phylum	Chordata
C26T3:1:1108:3485:9426	Hypentelium nigricans	167	species	97	2		Hypentelium nigricans	61316	61316	species	Hypentelium nigricans	61315	genus	Hypentelium	7968	family	Catostomidae	7952	order	Cypriniformes	186623	class	Actinopteri	7711	phylum	Chordata
C26T3:1:1108:8169:1477	Hypentelium nigricans	167	species	97	2		Hypentelium nigricans	61316	61316	species	Hypentelium nigricans	61315	genus	Hypentelium	7968	family	Catostomidae	7952	order	Cypriniformes	186623	class	Actinopteri	7711	phylum	Chordata
C26T3:1:1109:23115:24324	Hypentelium nigricans	167	species	97	2		Hypentelium nigricans	61316	61316	species	Hypentelium nigricans	61315	genus	Hypentelium	7968	family	Catostomidae	7952	order	Cypriniformes	186623	class	Actinopteri	7711	phylum	Chordata
C26T3:1:1109:8194:20307	Hypentelium nigricans	167	species	97	2		Hypentelium nigricans	61316	61316	species	Hypentelium nigricans	61315	genus	Hypentelium	7968	family	Catostomidae	7952	order	Cypriniformes	186623	class	Actinopteri	7711	phylum	Chordata
C26T3:1:1110:2841:15414	Hypentelium nigricans	167	species	97	8		Hypentelium nigricans	61316	61316	species	Hypentelium nigricans	61315	genus	Hypentelium	7968	family	Catostomidae	7952	order	Cypriniformes	186623	class	Actinopteri	7711	phylum	Chordata
C26T3:1:1110:7570:18732	Hypentelium nigricans	167	species	99	14		Hypentelium nigricans	61316	61316	species	Hypentelium nigricans	61315	genus	Hypentelium	7968	family	Catostomidae	7952	order	Cypriniformes	186623	class	Actinopteri	7711	phylum	Chordata
C26T3:1:1113:8386:24996	Hypentelium nigricans	167	species	97	5		Hypentelium nigricans	61316	61316	species	Hypentelium nigricans	61315	genus	Hypentelium	7968	family	Catostomidae	7952	order	Cypriniformes	186623	class	Actinopteri	7711	phylum	Chordata
C26T3:1:1114:5495:13850	Hypentelium nigricans	167	species	97	2		Hypentelium nigricans	61316	61316	species	Hypentelium nigricans	61315	genus	Hypentelium	7968	family	Catostomidae	7952	order	Cypriniformes	186623	class	Actinopteri	7711	phylum	Chordata
C26T3:1:1115:23053:12171	Hypentelium nigricans	167	species	97	2		Hypentelium nigricans	61316	61316	species	Hypentelium nigricans	61315	genus	Hypentelium	7968	family	Catostomidae	7952	order	Cypriniformes	186623	class	Actinopteri	7711	phylum	Chordata
C26T3:1:1118:8195:8676	Hypentelium nigricans	167	species	97	3		Hypentelium nigricans	61316	61316	species	Hypentelium nigricans	61315	genus	Hypentelium	7968	family	Catostomidae	7952	order	Cypriniformes	186623	class	Actinopteri	7711	phylum	Chordata
C26T3:1:2101:12377:24426	Hypentelium nigricans	167	species	97	2		Hypentelium nigricans	61316	61316	species	Hypentelium nigricans	61315	genus	Hypentelium	7968	family	Catostomidae	7952	order	Cypriniformes	186623	class	Actinopteri	7711	phylum	Chordata
C26T3:1:2101:2138:10350	Hypentelium nigricans	167	species	99	3		Hypentelium nigricans	61316	61316	species	Hypentelium nigricans	61315	genus	Hypentelium	7968	family	Catostomidae	7952	order	Cypriniformes	186623	class	Actinopteri	7711	phylum	Chordata
C26T3:1:2102:16287:24622	Hypentelium nigricans	167	species	97	2		Hypentelium nigricans	61316	61316	species	Hypentelium nigricans	61315	genus	Hypentelium	7968	family	Catostomidae	7952	order	Cypriniformes	186623	class	Actinopteri	7711	phylum	Chordata
C26T3:1:2102:2146:13417	Hypentelium nigricans	167	species	97	2		Hypentelium nigricans	61316	61316	species	Hypentelium nigricans	61315	genus	Hypentelium	7968	family	Catostomidae	7952	order	Cypriniformes	186623	class	Actinopteri	7711	phylum	Chordata
C26T3:1:1101:19101:18777	Hypentelium nigricans	165	species	99	21		Hypentelium nigricans	61316	61316	species	Hypentelium nigricans	61315	genus	Hypentelium	7968	family	Catostomidae	7952	order	Cypriniformes	186623	class	Actinopteri	7711	phylum	Chordata
C26T3:1:1101:20701:13308	Hypentelium nigricans	165	species	100	841		Hypentelium nigricans	61316	61316	species	Hypentelium nigricans	61315	genus	Hypentelium	7968	family	Catostomidae	7952	order	Cypriniformes	186623	class	Actinopteri	7711	phylum	Chordata
C26T3:1:1102:10140:14658	Hypentelium nigricans	165	species	99	30		Hypentelium nigricans	61316	61316	species	Hypentelium nigricans	61315	genus	Hypentelium	7968	family	Catostomidae	7952	order	Cypriniformes	186623	class	Actinopteri	7711	phylum	Chordata
C26T3:1:1102:15973:5948	Hypentelium nigricans	165	species	100	3		Hypentelium nigricans	61316	61316	species	Hypentelium nigricans	61315	genus	Hypentelium	7968	family	Catostomidae	7952	order	Cypriniformes	186623	class	Actinopteri	7711	phylum	Chordata
C26T3:1:1102:17908:10860	Hypentelium nigricans	165	species	99	19		Hypentelium nigricans	61316	61316	species	Hypentelium nigricans	61315	genus	Hypentelium	7968	family	Catostomidae	7952	order	Cypriniformes	186623	class	Actinopteri	7711	phylum	Chordata
C26T3:1:1103:22274:24127	Hypentelium nigricans	165	species	99	30		Hypentelium nigricans	61316	61316	species	Hypentelium nigricans	61315	genus	Hypentelium	7968	family	Catostomidae	7952	order	Cypriniformes	186623	class	Actinopteri	7711	phylum	Chordata
C26T3:1:1105:4901:21372	Hypentelium nigricans	165	species	100	9		Hypentelium nigricans	61316	61316	species	Hypentelium nigricans	61315	genus	Hypentelium	7968	family	Catostomidae	7952	order	Cypriniformes	186623	class	Actinopteri	7711	phylum	Chordata
C26T3:1:1106:7428:5179	Hypentelium nigricans	165	species	99	2		Hypentelium nigricans	61316	61316	species	Hypentelium nigricans	61315	genus	Hypentelium	7968	family	Catostomidae	7952	order	Cypriniformes	186623	class	Actinopteri	7711	phylum	Chordata
C26T3:1:1111:14847:19250	Hypentelium nigricans	165	species	100	2		Hypentelium nigricans	61316	61316	species	Hypentelium nigricans	61315	genus	Hypentelium	7968	family	Catostomidae	7952	order	Cypriniformes	186623	class	Actinopteri	7711	phylum	Chordata
C26T3:1:1112:28368:11652	Hypentelium nigricans	165	species	100	3		Hypentelium nigricans	61316	61316	species	Hypentelium nigricans	61315	genus	Hypentelium	7968	family	Catostomidae	7952	order	Cypriniformes	186623	class	Actinopteri	7711	phylum	Chordata
C26T3:1:1114:25600:7939	Hypentelium nigricans	165	species	99	21		Hypentelium nigricans	61316	61316	species	Hypentelium nigricans	61315	genus	Hypentelium	7968	family	Catostomidae	7952	order	Cypriniformes	186623	class	Actinopteri	7711	phylum	Chordata
C26T3:1:1115:27167:18850	Hypentelium nigricans	165	species	99	4		Hypentelium nigricans	61316	61316	species	Hypentelium nigricans	61315	genus	Hypentelium	7968	family	Catostomidae	7952	order	Cypriniformes	186623	class	Actinopteri	7711	phylum	Chordata
C26T3:1:1115:9967:10348	Hypentelium nigricans	165	species	100	4		Hypentelium nigricans	61316	61316	species	Hypentelium nigricans	61315	genus	Hypentelium	7968	family	Catostomidae	7952	order	Cypriniformes	186623	class	Actinopteri	7711	phylum	Chordata
C26T3:1:1117:15360:16772	Hypentelium nigricans	165	species	99	2		Hypentelium nigricans	61316	61316	species	Hypentelium nigricans	61315	genus	Hypentelium	7968	family	Catostomidae	7952	order	Cypriniformes	186623	class	Actinopteri	7711	phylum	Chordata
C26T3:1:1105:12806:4791	Larus delawarensis	193	species	99	2		Larus delawarensis	126683	126683	species	Larus delawarensis	8911	genus	Larus	8910	family	Laridae	8906	order	Charadriiformes	8782	class	Aves	7711	phylum	Chordata
C26T3:1:1102:25852:18134	Larus delawarensis	191	species	99	3		Larus delawarensis	126683	126683	species	Larus delawarensis	8911	genus	Larus	8910	family	Laridae	8906	order	Charadriiformes	8782	class	Aves	7711	phylum	Chordata
C26T3:1:1102:8717:21195	Larus delawarensis	182	species	100	8		Larus delawarensis	126683	126683	species	Larus delawarensis	8911	genus	Larus	8910	family	Laridae	8906	order	Charadriiformes	8782	class	Aves	7711	phylum	Chordata
C26T3:1:1113:23092:24682	Larus delawarensis	182	species	99	10		Larus delawarensis	126683	126683	species	Larus delawarensis	8911	genus	Larus	8910	family	Laridae	8906	order	Charadriiformes	8782	class	Aves	7711	phylum	Chordata
C26T3:1:1110:18432:1928	Larus delawarensis	178	species	99	47		Larus delawarensis	126683	126683	species	Larus delawarensis	8911	genus	Larus	8910	family	Laridae	8906	order	Charadriiformes	8782	class	Aves	7711	phylum	Chordata
C26T3:1:1101:28911:17589	Larus delawarensis	171	species	100	96		Larus delawarensis	126683	126683	species	Larus delawarensis	8911	genus	Larus	8910	family	Laridae	8906	order	Charadriiformes	8782	class	Aves	7711	phylum	Chordata
C26T3:1:2111:12226:16440	Larus delawarensis	171	species	97	2		Larus delawarensis	126683	126683	species	Larus delawarensis	8911	genus	Larus	8910	family	Laridae	8906	order	Charadriiformes	8782	class	Aves	7711	phylum	Chordata
C26T3:1:1101:13404:17927	Larus delawarensis	167	species	100	142		Larus delawarensis	126683	126683	species	Larus delawarensis	8911	genus	Larus	8910	family	Laridae	8906	order	Charadriiformes	8782	class	Aves	7711	phylum	Chordata
C26T3:1:1102:14011:8633	Lepomis gibbosus	169	species	97.8333	3		Lepomis gibbosus	270329	270329	species	Lepomis gibbosus	13105	genus	Lepomis	8180	family	Centrarchidae	1489940	order	Centrarchiformes	186623	class	Actinopteri	7711	phylum	Chordata
C26T3:1:1116:26094:15249	Lepomis gibbosus	167	species	99.3333	2		Lepomis gibbosus	270329	270329	species	Lepomis gibbosus	13105	genus	Lepomis	8180	family	Centrarchidae	1489940	order	Centrarchiformes	186623	class	Actinopteri	7711	phylum	Chordata
C26T3:1:1101:19969:5515	Luxilus cornutus	195	species	97	2		Luxilus cornutus	33539	33539	species	Luxilus cornutus	33535	genus	Luxilus	7953	family	Cyprinidae	7952	order	Cypriniformes	186623	class	Actinopteri	7711	phylum	Chordata
C26T3:1:1102:15654:15616	Luxilus cornutus	195	species	97	3		Luxilus cornutus	33539	33539	species	Luxilus cornutus	33535	genus	Luxilus	7953	family	Cyprinidae	7952	order	Cypriniformes	186623	class	Actinopteri	7711	phylum	Chordata
C26T3:1:1102:17036:8310	Luxilus cornutus	195	species	97	3		Luxilus cornutus	33539	33539	species	Luxilus cornutus	33535	genus	Luxilus	7953	family	Cyprinidae	7952	order	Cypriniformes	186623	class	Actinopteri	7711	phylum	Chordata
C26T3:1:2110:8381:21617	Luxilus cornutus	195	species	97	3		Luxilus cornutus	33539	33539	species	Luxilus cornutus	33535	genus	Luxilus	7953	family	Cyprinidae	7952	order	Cypriniformes	186623	class	Actinopteri	7711	phylum	Chordata
C26T3:1:1102:4486:11850	Luxilus cornutus	193	species	97	3		Luxilus cornutus	33539	33539	species	Luxilus cornutus	33535	genus	Luxilus	7953	family	Cyprinidae	7952	order	Cypriniformes	186623	class	Actinopteri	7711	phylum	Chordata
C26T3:1:2101:20038:3161	Luxilus cornutus	180	species	99	311		Luxilus cornutus	33539	33539	species	Luxilus cornutus	33535	genus	Luxilus	7953	family	Cyprinidae	7952	order	Cypriniformes	186623	class	Actinopteri	7711	phylum	Chordata
C26T3:1:2114:3781:11075	Luxilus cornutus	180	species	99	2		Luxilus cornutus	33539	33539	species	Luxilus cornutus	33535	genus	Luxilus	7953	family	Cyprinidae	7952	order	Cypriniformes	186623	class	Actinopteri	7711	phylum	Chordata
C26T3:1:1106:3613:10314	Luxilus cornutus	174	species	98	3		Luxilus cornutus	33539	33539	species	Luxilus cornutus	33535	genus	Luxilus	7953	family	Cyprinidae	7952	order	Cypriniformes	186623	class	Actinopteri	7711	phylum	Chordata
C26T3:1:2103:4655:20436	Luxilus cornutus	174	species	98	2		Luxilus cornutus	33539	33539	species	Luxilus cornutus	33535	genus	Luxilus	7953	family	Cyprinidae	7952	order	Cypriniformes	186623	class	Actinopteri	7711	phylum	Chordata
C26T3:1:1104:17239:15839	Luxilus cornutus	172	species	100	3		Luxilus cornutus	33539	33539	species	Luxilus cornutus	33535	genus	Luxilus	7953	family	Cyprinidae	7952	order	Cypriniformes	186623	class	Actinopteri	7711	phylum	Chordata
C26T3:1:2106:11011:1243	Luxilus cornutus	172	species	100	2		Luxilus cornutus	33539	33539	species	Luxilus cornutus	33535	genus	Luxilus	7953	family	Cyprinidae	7952	order	Cypriniformes	186623	class	Actinopteri	7711	phylum	Chordata
C26T3:1:1101:11614:4614	Luxilus cornutus	171	species	98	15		Luxilus cornutus	33539	33539	species	Luxilus cornutus	33535	genus	Luxilus	7953	family	Cyprinidae	7952	order	Cypriniformes	186623	class	Actinopteri	7711	phylum	Chordata
C26T3:1:1106:8797:4952	Luxilus cornutus	171	species	99	4		Luxilus cornutus	33539	33539	species	Luxilus cornutus	33535	genus	Luxilus	7953	family	Cyprinidae	7952	order	Cypriniformes	186623	class	Actinopteri	7711	phylum	Chordata
C26T3:1:1118:8881:2438	Luxilus cornutus	171	species	98	5		Luxilus cornutus	33539	33539	species	Luxilus cornutus	33535	genus	Luxilus	7953	family	Cyprinidae	7952	order	Cypriniformes	186623	class	Actinopteri	7711	phylum	Chordata
C26T3:1:2103:27608:18378	Luxilus cornutus	171	species	97	3		Luxilus cornutus	33539	33539	species	Luxilus cornutus	33535	genus	Luxilus	7953	family	Cyprinidae	7952	order	Cypriniformes	186623	class	Actinopteri	7711	phylum	Chordata
C26T3:1:2104:27977:10170	Luxilus cornutus	171	species	98	3		Luxilus cornutus	33539	33539	species	Luxilus cornutus	33535	genus	Luxilus	7953	family	Cyprinidae	7952	order	Cypriniformes	186623	class	Actinopteri	7711	phylum	Chordata
C26T3:1:2110:24982:23072	Luxilus cornutus	171	species	97	2		Luxilus cornutus	33539	33539	species	Luxilus cornutus	33535	genus	Luxilus	7953	family	Cyprinidae	7952	order	Cypriniformes	186623	class	Actinopteri	7711	phylum	Chordata
C26T3:1:1101:12419:7191	Luxilus cornutus	169	species	97	19		Luxilus cornutus	33539	33539	species	Luxilus cornutus	33535	genus	Luxilus	7953	family	Cyprinidae	7952	order	Cypriniformes	186623	class	Actinopteri	7711	phylum	Chordata
C26T3:1:1101:19329:5451	Luxilus cornutus	169	species	97	7		Luxilus cornutus	33539	33539	species	Luxilus cornutus	33535	genus	Luxilus	7953	family	Cyprinidae	7952	order	Cypriniformes	186623	class	Actinopteri	7711	phylum	Chordata
C26T3:1:1101:21679:18146	Luxilus cornutus	169	species	99	6		Luxilus cornutus	33539	33539	species	Luxilus cornutus	33535	genus	Luxilus	7953	family	Cyprinidae	7952	order	Cypriniformes	186623	class	Actinopteri	7711	phylum	Chordata
C26T3:1:1102:14882:1795	Luxilus cornutus	169	species	97	10		Luxilus cornutus	33539	33539	species	Luxilus cornutus	33535	genus	Luxilus	7953	family	Cyprinidae	7952	order	Cypriniformes	186623	class	Actinopteri	7711	phylum	Chordata
C26T3:1:1102:22679:13873	Luxilus cornutus	169	species	97	4		Luxilus cornutus	33539	33539	species	Luxilus cornutus	33535	genus	Luxilus	7953	family	Cyprinidae	7952	order	Cypriniformes	186623	class	Actinopteri	7711	phylum	Chordata
C26T3:1:1103:17839:5964	Luxilus cornutus	169	species	97	26		Luxilus cornutus	33539	33539	species	Luxilus cornutus	33535	genus	Luxilus	7953	family	Cyprinidae	7952	order	Cypriniformes	186623	class	Actinopteri	7711	phylum	Chordata
C26T3:1:1103:28700:13658	Luxilus cornutus	169	species	97	7		Luxilus cornutus	33539	33539	species	Luxilus cornutus	33535	genus	Luxilus	7953	family	Cyprinidae	7952	order	Cypriniformes	186623	class	Actinopteri	7711	phylum	Chordata
C26T3:1:1103:5700:5734	Luxilus cornutus	169	species	97	8		Luxilus cornutus	33539	33539	species	Luxilus cornutus	33535	genus	Luxilus	7953	family	Cyprinidae	7952	order	Cypriniformes	186623	class	Actinopteri	7711	phylum	Chordata
C26T3:1:1105:23567:24163	Luxilus cornutus	169	species	97	4		Luxilus cornutus	33539	33539	species	Luxilus cornutus	33535	genus	Luxilus	7953	family	Cyprinidae	7952	order	Cypriniformes	186623	class	Actinopteri	7711	phylum	Chordata
C26T3:1:1105:27328:6217	Luxilus cornutus	169	species	97	4		Luxilus cornutus	33539	33539	species	Luxilus cornutus	33535	genus	Luxilus	7953	family	Cyprinidae	7952	order	Cypriniformes	186623	class	Actinopteri	7711	phylum	Chordata
C26T3:1:1105:6533:8062	Luxilus cornutus	169	species	97	3		Luxilus cornutus	33539	33539	species	Luxilus cornutus	33535	genus	Luxilus	7953	family	Cyprinidae	7952	order	Cypriniformes	186623	class	Actinopteri	7711	phylum	Chordata
C26T3:1:1105:9208:4073	Luxilus cornutus	169	species	97	5		Luxilus cornutus	33539	33539	species	Luxilus cornutus	33535	genus	Luxilus	7953	family	Cyprinidae	7952	order	Cypriniformes	186623	class	Actinopteri	7711	phylum	Chordata
C26T3:1:1106:5623:10915	Luxilus cornutus	169	species	97	2		Luxilus cornutus	33539	33539	species	Luxilus cornutus	33535	genus	Luxilus	7953	family	Cyprinidae	7952	order	Cypriniformes	186623	class	Actinopteri	7711	phylum	Chordata
C26T3:1:1106:9830:6843	Luxilus cornutus	169	species	97	4		Luxilus cornutus	33539	33539	species	Luxilus cornutus	33535	genus	Luxilus	7953	family	Cyprinidae	7952	order	Cypriniformes	186623	class	Actinopteri	7711	phylum	Chordata
C26T3:1:1107:20084:6284	Luxilus cornutus	169	species	97	2		Luxilus cornutus	33539	33539	species	Luxilus cornutus	33535	genus	Luxilus	7953	family	Cyprinidae	7952	order	Cypriniformes	186623	class	Actinopteri	7711	phylum	Chordata
C26T3:1:1110:6373:15772	Luxilus cornutus	169	species	97	3		Luxilus cornutus	33539	33539	species	Luxilus cornutus	33535	genus	Luxilus	7953	family	Cyprinidae	7952	order	Cypriniformes	186623	class	Actinopteri	7711	phylum	Chordata
C26T3:1:1112:19775:24446	Luxilus cornutus	169	species	97	6		Luxilus cornutus	33539	33539	species	Luxilus cornutus	33535	genus	Luxilus	7953	family	Cyprinidae	7952	order	Cypriniformes	186623	class	Actinopteri	7711	phylum	Chordata
C26T3:1:1113:2090:14658	Luxilus cornutus	169	species	97	2		Luxilus cornutus	33539	33539	species	Luxilus cornutus	33535	genus	Luxilus	7953	family	Cyprinidae	7952	order	Cypriniformes	186623	class	Actinopteri	7711	phylum	Chordata
C26T3:1:1114:25973:4090	Luxilus cornutus	169	species	97	4		Luxilus cornutus	33539	33539	species	Luxilus cornutus	33535	genus	Luxilus	7953	family	Cyprinidae	7952	order	Cypriniformes	186623	class	Actinopteri	7711	phylum	Chordata
C26T3:1:1114:4623:19739	Luxilus cornutus	169	species	97	3		Luxilus cornutus	33539	33539	species	Luxilus cornutus	33535	genus	Luxilus	7953	family	Cyprinidae	7952	order	Cypriniformes	186623	class	Actinopteri	7711	phylum	Chordata
C26T3:1:1114:5053:12024	Luxilus cornutus	169	species	97	4		Luxilus cornutus	33539	33539	species	Luxilus cornutus	33535	genus	Luxilus	7953	family	Cyprinidae	7952	order	Cypriniformes	186623	class	Actinopteri	7711	phylum	Chordata
C26T3:1:1115:21743:9218	Luxilus cornutus	169	species	97	7		Luxilus cornutus	33539	33539	species	Luxilus cornutus	33535	genus	Luxilus	7953	family	Cyprinidae	7952	order	Cypriniformes	186623	class	Actinopteri	7711	phylum	Chordata
C26T3:1:1115:25559:22855	Luxilus cornutus	169	species	97	7		Luxilus cornutus	33539	33539	species	Luxilus cornutus	33535	genus	Luxilus	7953	family	Cyprinidae	7952	order	Cypriniformes	186623	class	Actinopteri	7711	phylum	Chordata
C26T3:1:1115:28065:12868	Luxilus cornutus	169	species	97	3		Luxilus cornutus	33539	33539	species	Luxilus cornutus	33535	genus	Luxilus	7953	family	Cyprinidae	7952	order	Cypriniformes	186623	class	Actinopteri	7711	phylum	Chordata
C26T3:1:1116:26365:14988	Luxilus cornutus	169	species	97	3		Luxilus cornutus	33539	33539	species	Luxilus cornutus	33535	genus	Luxilus	7953	family	Cyprinidae	7952	order	Cypriniformes	186623	class	Actinopteri	7711	phylum	Chordata
C26T3:1:1117:17040:1389	Luxilus cornutus	169	species	97	2		Luxilus cornutus	33539	33539	species	Luxilus cornutus	33535	genus	Luxilus	7953	family	Cyprinidae	7952	order	Cypriniformes	186623	class	Actinopteri	7711	phylum	Chordata
C26T3:1:1119:18345:18504	Luxilus cornutus	169	species	97	7		Luxilus cornutus	33539	33539	species	Luxilus cornutus	33535	genus	Luxilus	7953	family	Cyprinidae	7952	order	Cypriniformes	186623	class	Actinopteri	7711	phylum	Chordata
C26T3:1:2107:27074:6793	Luxilus cornutus	169	species	97	2		Luxilus cornutus	33539	33539	species	Luxilus cornutus	33535	genus	Luxilus	7953	family	Cyprinidae	7952	order	Cypriniformes	186623	class	Actinopteri	7711	phylum	Chordata
C26T3:1:2109:9849:21679	Luxilus cornutus	169	species	97	3		Luxilus cornutus	33539	33539	species	Luxilus cornutus	33535	genus	Luxilus	7953	family	Cyprinidae	7952	order	Cypriniformes	186623	class	Actinopteri	7711	phylum	Chordata
C26T3:1:2110:7086:8890	Luxilus cornutus	169	species	97	3		Luxilus cornutus	33539	33539	species	Luxilus cornutus	33535	genus	Luxilus	7953	family	Cyprinidae	7952	order	Cypriniformes	186623	class	Actinopteri	7711	phylum	Chordata
C26T3:1:2111:24142:18147	Luxilus cornutus	169	species	97	2		Luxilus cornutus	33539	33539	species	Luxilus cornutus	33535	genus	Luxilus	7953	family	Cyprinidae	7952	order	Cypriniformes	186623	class	Actinopteri	7711	phylum	Chordata
C26T3:1:1101:12855:4723	Luxilus cornutus	167	species	97	17		Luxilus cornutus	33539	33539	species	Luxilus cornutus	33535	genus	Luxilus	7953	family	Cyprinidae	7952	order	Cypriniformes	186623	class	Actinopteri	7711	phylum	Chordata
C26T3:1:1102:12318:3000	Luxilus cornutus	167	species	97	3		Luxilus cornutus	33539	33539	species	Luxilus cornutus	33535	genus	Luxilus	7953	family	Cyprinidae	7952	order	Cypriniformes	186623	class	Actinopteri	7711	phylum	Chordata
C26T3:1:1102:21870:6726	Luxilus cornutus	167	species	97	10		Luxilus cornutus	33539	33539	species	Luxilus cornutus	33535	genus	Luxilus	7953	family	Cyprinidae	7952	order	Cypriniformes	186623	class	Actinopteri	7711	phylum	Chordata
C26T3:1:1106:7274:14590	Luxilus cornutus	167	species	97	2		Luxilus cornutus	33539	33539	species	Luxilus cornutus	33535	genus	Luxilus	7953	family	Cyprinidae	7952	order	Cypriniformes	186623	class	Actinopteri	7711	phylum	Chordata
C26T3:1:1107:19331:4898	Luxilus cornutus	167	species	97	5		Luxilus cornutus	33539	33539	species	Luxilus cornutus	33535	genus	Luxilus	7953	family	Cyprinidae	7952	order	Cypriniformes	186623	class	Actinopteri	7711	phylum	Chordata
C26T3:1:1116:25668:6203	Luxilus cornutus	167	species	97	3		Luxilus cornutus	33539	33539	species	Luxilus cornutus	33535	genus	Luxilus	7953	family	Cyprinidae	7952	order	Cypriniformes	186623	class	Actinopteri	7711	phylum	Chordata
C26T3:1:1117:20209:6885	Luxilus cornutus	167	species	97	8		Luxilus cornutus	33539	33539	species	Luxilus cornutus	33535	genus	Luxilus	7953	family	Cyprinidae	7952	order	Cypriniformes	186623	class	Actinopteri	7711	phylum	Chordata
C26T3:1:1105:25218:11134	Luxilus cornutus	165	species	97	5		Luxilus cornutus	33539	33539	species	Luxilus cornutus	33535	genus	Luxilus	7953	family	Cyprinidae	7952	order	Cypriniformes	186623	class	Actinopteri	7711	phylum	Chordata
C26T3:1:1115:25500:21354	Luxilus cornutus	165	species	98	6		Luxilus cornutus	33539	33539	species	Luxilus cornutus	33535	genus	Luxilus	7953	family	Cyprinidae	7952	order	Cypriniformes	186623	class	Actinopteri	7711	phylum	Chordata
C26T3:1:2102:28402:9462	Luxilus cornutus	165	species	97	7		Luxilus cornutus	33539	33539	species	Luxilus cornutus	33535	genus	Luxilus	7953	family	Cyprinidae	7952	order	Cypriniformes	186623	class	Actinopteri	7711	phylum	Chordata
C26T3:1:2104:4255:11267	Luxilus cornutus	165	species	97	2		Luxilus cornutus	33539	33539	species	Luxilus cornutus	33535	genus	Luxilus	7953	family	Cyprinidae	7952	order	Cypriniformes	186623	class	Actinopteri	7711	phylum	Chordata
C26T3:1:1107:25424:14757	Lythrurus ardens	169	species	97	2		Lythrurus ardens	36786	36786	species	Lythrurus ardens	7966	genus	Lythrurus	7953	family	Cyprinidae	7952	order	Cypriniformes	186623	class	Actinopteri	7711	phylum	Chordata
C26T3:1:1108:16467:18884	Lythrurus fumeus	180	species	100	13		Lythrurus fumeus	36787	36787	species	Lythrurus fumeus	7966	genus	Lythrurus	7953	family	Cyprinidae	7952	order	Cypriniformes	186623	class	Actinopteri	7711	phylum	Chordata
C26T3:1:1108:22035:1203	Lythrurus fumeus	171	species	98	2		Lythrurus fumeus	36787	36787	species	Lythrurus fumeus	7966	genus	Lythrurus	7953	family	Cyprinidae	7952	order	Cypriniformes	186623	class	Actinopteri	7711	phylum	Chordata
C26T3:1:1118:19327:10141	Lythrurus fumeus	165	species	97	3		Lythrurus fumeus	36787	36787	species	Lythrurus fumeus	7966	genus	Lythrurus	7953	family	Cyprinidae	7952	order	Cypriniformes	186623	class	Actinopteri	7711	phylum	Chordata
C26T3:1:1107:17982:14255	Meleagris gallopavo	180	species	98.8	20		Meleagris gallopavo	9103	9103	species	Meleagris gallopavo	9102	genus	Meleagris	9005	family	Phasianidae	8976	order	Galliformes	8782	class	Aves	7711	phylum	Chordata
C26T3:1:1101:19307:21490	Micropterus dolomieu	202	species	99.2	9		Micropterus dolomieu	147949	147949	species	Micropterus dolomieu	27705	genus	Micropterus	8180	family	Centrarchidae	1489940	order	Centrarchiformes	186623	class	Actinopteri	7711	phylum	Chordata
C26T3:1:1101:8270:10252	Micropterus dolomieu	200	species	97	6		Micropterus dolomieu	147949	147949	species	Micropterus dolomieu	27705	genus	Micropterus	8180	family	Centrarchidae	1489940	order	Centrarchiformes	186623	class	Actinopteri	7711	phylum	Chordata
C26T3:1:2109:27785:14146	Micropterus dolomieu	200	species	99.2	3		Micropterus dolomieu	147949	147949	species	Micropterus dolomieu	27705	genus	Micropterus	8180	family	Centrarchidae	1489940	order	Centrarchiformes	186623	class	Actinopteri	7711	phylum	Chordata
C26T3:1:1101:9034:24747	Micropterus dolomieu	198	species	97	12		Micropterus dolomieu	147949	147949	species	Micropterus dolomieu	27705	genus	Micropterus	8180	family	Centrarchidae	1489940	order	Centrarchiformes	186623	class	Actinopteri	7711	phylum	Chordata
C26T3:1:1101:27792:7446	Micropterus dolomieu	196	species	98.2	5		Micropterus dolomieu	147949	147949	species	Micropterus dolomieu	27705	genus	Micropterus	8180	family	Centrarchidae	1489940	order	Centrarchiformes	186623	class	Actinopteri	7711	phylum	Chordata
C26T3:1:2105:19649:23699	Micropterus dolomieu	196	species	98.2	2		Micropterus dolomieu	147949	147949	species	Micropterus dolomieu	27705	genus	Micropterus	8180	family	Centrarchidae	1489940	order	Centrarchiformes	186623	class	Actinopteri	7711	phylum	Chordata
C26T3:1:1107:6243:22517	Micropterus dolomieu	195	species	99.2	2		Micropterus dolomieu	147949	147949	species	Micropterus dolomieu	27705	genus	Micropterus	8180	family	Centrarchidae	1489940	order	Centrarchiformes	186623	class	Actinopteri	7711	phylum	Chordata
C26T3:1:1115:14418:17715	Micropterus dolomieu	195	species	98.2	5		Micropterus dolomieu	147949	147949	species	Micropterus dolomieu	27705	genus	Micropterus	8180	family	Centrarchidae	1489940	order	Centrarchiformes	186623	class	Actinopteri	7711	phylum	Chordata
C26T3:1:1116:16586:18918	Micropterus dolomieu	195	species	98.2	5		Micropterus dolomieu	147949	147949	species	Micropterus dolomieu	27705	genus	Micropterus	8180	family	Centrarchidae	1489940	order	Centrarchiformes	186623	class	Actinopteri	7711	phylum	Chordata
C26T3:1:1101:25774:14896	Micropterus dolomieu	193	species	97	14		Micropterus dolomieu	147949	147949	species	Micropterus dolomieu	27705	genus	Micropterus	8180	family	Centrarchidae	1489940	order	Centrarchiformes	186623	class	Actinopteri	7711	phylum	Chordata
C26T3:1:1110:4707:16965	Micropterus dolomieu	191	species	99.2	5		Micropterus dolomieu	147949	147949	species	Micropterus dolomieu	27705	genus	Micropterus	8180	family	Centrarchidae	1489940	order	Centrarchiformes	186623	class	Actinopteri	7711	phylum	Chordata
C26T3:1:1117:28370:9349	Micropterus dolomieu	191	species	97.4	3		Micropterus dolomieu	147949	147949	species	Micropterus dolomieu	27705	genus	Micropterus	8180	family	Centrarchidae	1489940	order	Centrarchiformes	186623	class	Actinopteri	7711	phylum	Chordata
C26T3:1:1102:8795:1559	Micropterus dolomieu	189	species	99.2	6		Micropterus dolomieu	147949	147949	species	Micropterus dolomieu	27705	genus	Micropterus	8180	family	Centrarchidae	1489940	order	Centrarchiformes	186623	class	Actinopteri	7711	phylum	Chordata
C26T3:1:2104:22279:10360	Micropterus dolomieu	189	species	98.2	2		Micropterus dolomieu	147949	147949	species	Micropterus dolomieu	27705	genus	Micropterus	8180	family	Centrarchidae	1489940	order	Centrarchiformes	186623	class	Actinopteri	7711	phylum	Chordata
C26T3:1:1102:6133:18398	Micropterus dolomieu	187	species	98.2	24		Micropterus dolomieu	147949	147949	species	Micropterus dolomieu	27705	genus	Micropterus	8180	family	Centrarchidae	1489940	order	Centrarchiformes	186623	class	Actinopteri	7711	phylum	Chordata
C26T3:1:1105:24449:11933	Micropterus dolomieu	187	species	98.2	3		Micropterus dolomieu	147949	147949	species	Micropterus dolomieu	27705	genus	Micropterus	8180	family	Centrarchidae	1489940	order	Centrarchiformes	186623	class	Actinopteri	7711	phylum	Chordata
C26T3:1:1110:24952:10619	Micropterus dolomieu	185	species	100	2		Micropterus dolomieu	147949	147949	species	Micropterus dolomieu	27705	genus	Micropterus	8180	family	Centrarchidae	1489940	order	Centrarchiformes	186623	class	Actinopteri	7711	phylum	Chordata
C26T3:1:1110:25510:8722	Micropterus dolomieu	185	species	98.2	2		Micropterus dolomieu	147949	147949	species	Micropterus dolomieu	27705	genus	Micropterus	8180	family	Centrarchidae	1489940	order	Centrarchiformes	186623	class	Actinopteri	7711	phylum	Chordata
C26T3:1:1112:10196:9794	Micropterus dolomieu	185	species	99	4		Micropterus dolomieu	147949	147949	species	Micropterus dolomieu	27705	genus	Micropterus	8180	family	Centrarchidae	1489940	order	Centrarchiformes	186623	class	Actinopteri	7711	phylum	Chordata
C26T3:1:1115:13510:3894	Micropterus dolomieu	182	species	100	3		Micropterus dolomieu	147949	147949	species	Micropterus dolomieu	27705	genus	Micropterus	8180	family	Centrarchidae	1489940	order	Centrarchiformes	186623	class	Actinopteri	7711	phylum	Chordata
C26T3:1:1101:22619:1719	Micropterus dolomieu	180	species	97.2	4		Micropterus dolomieu	147949	147949	species	Micropterus dolomieu	27705	genus	Micropterus	8180	family	Centrarchidae	1489940	order	Centrarchiformes	186623	class	Actinopteri	7711	phylum	Chordata
C26T3:1:1102:26579:8841	Micropterus dolomieu	180	species	99	8		Micropterus dolomieu	147949	147949	species	Micropterus dolomieu	27705	genus	Micropterus	8180	family	Centrarchidae	1489940	order	Centrarchiformes	186623	class	Actinopteri	7711	phylum	Chordata
C26T3:1:1105:13822:5616	Micropterus dolomieu	178	species	100	6		Micropterus dolomieu	147949	147949	species	Micropterus dolomieu	27705	genus	Micropterus	8180	family	Centrarchidae	1489940	order	Centrarchiformes	186623	class	Actinopteri	7711	phylum	Chordata
C26T3:1:1115:9549:6267	Micropterus dolomieu	178	species	99	2		Micropterus dolomieu	147949	147949	species	Micropterus dolomieu	27705	genus	Micropterus	8180	family	Centrarchidae	1489940	order	Centrarchiformes	186623	class	Actinopteri	7711	phylum	Chordata
C26T3:1:1118:8019:6360	Micropterus dolomieu	178	species	97.2	3		Micropterus dolomieu	147949	147949	species	Micropterus dolomieu	27705	genus	Micropterus	8180	family	Centrarchidae	1489940	order	Centrarchiformes	186623	class	Actinopteri	7711	phylum	Chordata
C26T3:1:1104:10684:9671	Micropterus dolomieu	176	species	97	8		Micropterus dolomieu	147949	147949	species	Micropterus dolomieu	27705	genus	Micropterus	8180	family	Centrarchidae	1489940	order	Centrarchiformes	186623	class	Actinopteri	7711	phylum	Chordata
C26T3:1:2104:17824:7897	Micropterus dolomieu	176	species	97	3		Micropterus dolomieu	147949	147949	species	Micropterus dolomieu	27705	genus	Micropterus	8180	family	Centrarchidae	1489940	order	Centrarchiformes	186623	class	Actinopteri	7711	phylum	Chordata
C26T3:1:2106:10583:10467	Micropterus dolomieu	176	species	98	4		Micropterus dolomieu	147949	147949	species	Micropterus dolomieu	27705	genus	Micropterus	8180	family	Centrarchidae	1489940	order	Centrarchiformes	186623	class	Actinopteri	7711	phylum	Chordata
C26T3:1:1101:11384:24666	Micropterus dolomieu	174	species	100	896		Micropterus dolomieu	147949	147949	species	Micropterus dolomieu	27705	genus	Micropterus	8180	family	Centrarchidae	1489940	order	Centrarchiformes	186623	class	Actinopteri	7711	phylum	Chordata
C26T3:1:1102:3743:16219	Micropterus dolomieu	174	species	100	5		Micropterus dolomieu	147949	147949	species	Micropterus dolomieu	27705	genus	Micropterus	8180	family	Centrarchidae	1489940	order	Centrarchiformes	186623	class	Actinopteri	7711	phylum	Chordata
C26T3:1:1103:9939:19491	Micropterus dolomieu	174	species	98.2	4		Micropterus dolomieu	147949	147949	species	Micropterus dolomieu	27705	genus	Micropterus	8180	family	Centrarchidae	1489940	order	Centrarchiformes	186623	class	Actinopteri	7711	phylum	Chordata
C26T3:1:1104:28640:18091	Micropterus dolomieu	174	species	100	4		Micropterus dolomieu	147949	147949	species	Micropterus dolomieu	27705	genus	Micropterus	8180	family	Centrarchidae	1489940	order	Centrarchiformes	186623	class	Actinopteri	7711	phylum	Chordata
C26T3:1:1102:11593:12099	Micropterus dolomieu	172	species	100	7		Micropterus dolomieu	147949	147949	species	Micropterus dolomieu	27705	genus	Micropterus	8180	family	Centrarchidae	1489940	order	Centrarchiformes	186623	class	Actinopteri	7711	phylum	Chordata
C26T3:1:1104:24186:22420	Micropterus dolomieu	172	species	97	3		Micropterus dolomieu	147949	147949	species	Micropterus dolomieu	27705	genus	Micropterus	8180	family	Centrarchidae	1489940	order	Centrarchiformes	186623	class	Actinopteri	7711	phylum	Chordata
C26T3:1:1105:6484:14367	Micropterus dolomieu	172	species	97.2	5		Micropterus dolomieu	147949	147949	species	Micropterus dolomieu	27705	genus	Micropterus	8180	family	Centrarchidae	1489940	order	Centrarchiformes	186623	class	Actinopteri	7711	phylum	Chordata
C26T3:1:1111:23529:5706	Micropterus dolomieu	172	species	98	2		Micropterus dolomieu	147949	147949	species	Micropterus dolomieu	27705	genus	Micropterus	8180	family	Centrarchidae	1489940	order	Centrarchiformes	186623	class	Actinopteri	7711	phylum	Chordata
C26T3:1:1112:17006:4998	Micropterus dolomieu	172	species	98	2		Micropterus dolomieu	147949	147949	species	Micropterus dolomieu	27705	genus	Micropterus	8180	family	Centrarchidae	1489940	order	Centrarchiformes	186623	class	Actinopteri	7711	phylum	Chordata
C26T3:1:1116:4549:18118	Micropterus dolomieu	172	species	97.2	2		Micropterus dolomieu	147949	147949	species	Micropterus dolomieu	27705	genus	Micropterus	8180	family	Centrarchidae	1489940	order	Centrarchiformes	186623	class	Actinopteri	7711	phylum	Chordata
C26T3:1:1101:12140:23616	Micropterus dolomieu	171	species	100	98		Micropterus dolomieu	147949	147949	species	Micropterus dolomieu	27705	genus	Micropterus	8180	family	Centrarchidae	1489940	order	Centrarchiformes	186623	class	Actinopteri	7711	phylum	Chordata
C26T3:1:1113:20152:11481	Micropterus dolomieu	171	species	100	2		Micropterus dolomieu	147949	147949	species	Micropterus dolomieu	27705	genus	Micropterus	8180	family	Centrarchidae	1489940	order	Centrarchiformes	186623	class	Actinopteri	7711	phylum	Chordata
C26T3:1:2101:25653:7899	Micropterus dolomieu	171	species	98	3		Micropterus dolomieu	147949	147949	species	Micropterus dolomieu	27705	genus	Micropterus	8180	family	Centrarchidae	1489940	order	Centrarchiformes	186623	class	Actinopteri	7711	phylum	Chordata
C26T3:1:2113:25832:14378	Micropterus dolomieu	171	species	100	16		Micropterus dolomieu	147949	147949	species	Micropterus dolomieu	27705	genus	Micropterus	8180	family	Centrarchidae	1489940	order	Centrarchiformes	186623	class	Actinopteri	7711	phylum	Chordata
C26T3:1:2118:3444:11232	Micropterus dolomieu	171	species	99	2		Micropterus dolomieu	147949	147949	species	Micropterus dolomieu	27705	genus	Micropterus	8180	family	Centrarchidae	1489940	order	Centrarchiformes	186623	class	Actinopteri	7711	phylum	Chordata
C26T3:1:1101:10596:12494	Micropterus dolomieu	169	species	100	65		Micropterus dolomieu	147949	147949	species	Micropterus dolomieu	27705	genus	Micropterus	8180	family	Centrarchidae	1489940	order	Centrarchiformes	186623	class	Actinopteri	7711	phylum	Chordata
C26T3:1:1101:12109:20932	Micropterus dolomieu	169	species	98	180		Micropterus dolomieu	147949	147949	species	Micropterus dolomieu	27705	genus	Micropterus	8180	family	Centrarchidae	1489940	order	Centrarchiformes	186623	class	Actinopteri	7711	phylum	Chordata
C26T3:1:1102:13866:17689	Micropterus dolomieu	169	species	97.2	3		Micropterus dolomieu	147949	147949	species	Micropterus dolomieu	27705	genus	Micropterus	8180	family	Centrarchidae	1489940	order	Centrarchiformes	186623	class	Actinopteri	7711	phylum	Chordata
C26T3:1:1103:24531:13640	Micropterus dolomieu	169	species	97.2	5		Micropterus dolomieu	147949	147949	species	Micropterus dolomieu	27705	genus	Micropterus	8180	family	Centrarchidae	1489940	order	Centrarchiformes	186623	class	Actinopteri	7711	phylum	Chordata
C26T3:1:1107:14704:8932	Micropterus dolomieu	169	species	99	1437		Micropterus dolomieu	147949	147949	species	Micropterus dolomieu	27705	genus	Micropterus	8180	family	Centrarchidae	1489940	order	Centrarchiformes	186623	class	Actinopteri	7711	phylum	Chordata
C26T3:1:2102:13628:23322	Micropterus dolomieu	169	species	99	3		Micropterus dolomieu	147949	147949	species	Micropterus dolomieu	27705	genus	Micropterus	8180	family	Centrarchidae	1489940	order	Centrarchiformes	186623	class	Actinopteri	7711	phylum	Chordata
C26T3:1:2109:21860:24976	Micropterus dolomieu	169	species	99	5		Micropterus dolomieu	147949	147949	species	Micropterus dolomieu	27705	genus	Micropterus	8180	family	Centrarchidae	1489940	order	Centrarchiformes	186623	class	Actinopteri	7711	phylum	Chordata
C26T3:1:2114:3175:7948	Micropterus dolomieu	169	species	98	2		Micropterus dolomieu	147949	147949	species	Micropterus dolomieu	27705	genus	Micropterus	8180	family	Centrarchidae	1489940	order	Centrarchiformes	186623	class	Actinopteri	7711	phylum	Chordata
C26T3:1:2116:4833:6319	Micropterus dolomieu	169	species	99	137		Micropterus dolomieu	147949	147949	species	Micropterus dolomieu	27705	genus	Micropterus	8180	family	Centrarchidae	1489940	order	Centrarchiformes	186623	class	Actinopteri	7711	phylum	Chordata
C26T3:1:1101:19573:5941	Micropterus dolomieu	167	species	99	2		Micropterus dolomieu	147949	147949	species	Micropterus dolomieu	27705	genus	Micropterus	8180	family	Centrarchidae	1489940	order	Centrarchiformes	186623	class	Actinopteri	7711	phylum	Chordata
C26T3:1:1103:2549:15581	Micropterus dolomieu	167	species	98	25		Micropterus dolomieu	147949	147949	species	Micropterus dolomieu	27705	genus	Micropterus	8180	family	Centrarchidae	1489940	order	Centrarchiformes	186623	class	Actinopteri	7711	phylum	Chordata
C26T3:1:1107:9593:1982	Micropterus dolomieu	167	species	99	3		Micropterus dolomieu	147949	147949	species	Micropterus dolomieu	27705	genus	Micropterus	8180	family	Centrarchidae	1489940	order	Centrarchiformes	186623	class	Actinopteri	7711	phylum	Chordata
C26T3:1:1108:20211:22268	Micropterus dolomieu	167	species	99	3		Micropterus dolomieu	147949	147949	species	Micropterus dolomieu	27705	genus	Micropterus	8180	family	Centrarchidae	1489940	order	Centrarchiformes	186623	class	Actinopteri	7711	phylum	Chordata
C26T3:1:1108:9738:24397	Micropterus dolomieu	167	species	99	2		Micropterus dolomieu	147949	147949	species	Micropterus dolomieu	27705	genus	Micropterus	8180	family	Centrarchidae	1489940	order	Centrarchiformes	186623	class	Actinopteri	7711	phylum	Chordata
C26T3:1:1111:12434:4954	Micropterus dolomieu	167	species	99	3		Micropterus dolomieu	147949	147949	species	Micropterus dolomieu	27705	genus	Micropterus	8180	family	Centrarchidae	1489940	order	Centrarchiformes	186623	class	Actinopteri	7711	phylum	Chordata
C26T3:1:2102:6316:5039	Micropterus dolomieu	167	species	98	4		Micropterus dolomieu	147949	147949	species	Micropterus dolomieu	27705	genus	Micropterus	8180	family	Centrarchidae	1489940	order	Centrarchiformes	186623	class	Actinopteri	7711	phylum	Chordata
C26T3:1:2107:7020:3249	Micropterus dolomieu	167	species	99	2		Micropterus dolomieu	147949	147949	species	Micropterus dolomieu	27705	genus	Micropterus	8180	family	Centrarchidae	1489940	order	Centrarchiformes	186623	class	Actinopteri	7711	phylum	Chordata
C26T3:1:2112:23811:18585	Micropterus dolomieu	167	species	99	2		Micropterus dolomieu	147949	147949	species	Micropterus dolomieu	27705	genus	Micropterus	8180	family	Centrarchidae	1489940	order	Centrarchiformes	186623	class	Actinopteri	7711	phylum	Chordata
C26T3:1:1102:10999:4151	Micropterus dolomieu	165	species	99	2		Micropterus dolomieu	147949	147949	species	Micropterus dolomieu	27705	genus	Micropterus	8180	family	Centrarchidae	1489940	order	Centrarchiformes	186623	class	Actinopteri	7711	phylum	Chordata
C26T3:1:1102:12589:16509	Micropterus dolomieu	165	species	99	21		Micropterus dolomieu	147949	147949	species	Micropterus dolomieu	27705	genus	Micropterus	8180	family	Centrarchidae	1489940	order	Centrarchiformes	186623	class	Actinopteri	7711	phylum	Chordata
C26T3:1:1105:29115:11729	Micropterus dolomieu	165	species	98	3		Micropterus dolomieu	147949	147949	species	Micropterus dolomieu	27705	genus	Micropterus	8180	family	Centrarchidae	1489940	order	Centrarchiformes	186623	class	Actinopteri	7711	phylum	Chordata
C26T3:1:1107:24869:19427	Micropterus dolomieu	165	species	99	22		Micropterus dolomieu	147949	147949	species	Micropterus dolomieu	27705	genus	Micropterus	8180	family	Centrarchidae	1489940	order	Centrarchiformes	186623	class	Actinopteri	7711	phylum	Chordata
C26T3:1:1112:4803:15579	Micropterus dolomieu	165	species	99	2		Micropterus dolomieu	147949	147949	species	Micropterus dolomieu	27705	genus	Micropterus	8180	family	Centrarchidae	1489940	order	Centrarchiformes	186623	class	Actinopteri	7711	phylum	Chordata
C26T3:1:1115:3425:6581	Micropterus dolomieu	165	species	98	3		Micropterus dolomieu	147949	147949	species	Micropterus dolomieu	27705	genus	Micropterus	8180	family	Centrarchidae	1489940	order	Centrarchiformes	186623	class	Actinopteri	7711	phylum	Chordata
C26T3:1:2105:7025:10532	Micropterus dolomieu	165	species	99	2		Micropterus dolomieu	147949	147949	species	Micropterus dolomieu	27705	genus	Micropterus	8180	family	Centrarchidae	1489940	order	Centrarchiformes	186623	class	Actinopteri	7711	phylum	Chordata
C26T3:1:2102:10256:10414	Micropterus punctulatus	180	species	99	42		Micropterus punctulatus	225060	225060	species	Micropterus punctulatus	27705	genus	Micropterus	8180	family	Centrarchidae	1489940	order	Centrarchiformes	186623	class	Actinopteri	7711	phylum	Chordata
C26T3:1:1102:9283:5341	Micropterus punctulatus	171	species	100	3		Micropterus punctulatus	225060	225060	species	Micropterus punctulatus	27705	genus	Micropterus	8180	family	Centrarchidae	1489940	order	Centrarchiformes	186623	class	Actinopteri	7711	phylum	Chordata
C26T3:1:1102:17920:6122	Micropterus punctulatus	169	species	98	2		Micropterus punctulatus	225060	225060	species	Micropterus punctulatus	27705	genus	Micropterus	8180	family	Centrarchidae	1489940	order	Centrarchiformes	186623	class	Actinopteri	7711	phylum	Chordata
C26T3:1:1106:23012:19428	Micropterus punctulatus	167	species	97	9		Micropterus punctulatus	225060	225060	species	Micropterus punctulatus	27705	genus	Micropterus	8180	family	Centrarchidae	1489940	order	Centrarchiformes	186623	class	Actinopteri	7711	phylum	Chordata
C26T3:1:1114:8998:6006	Micropterus punctulatus	167	species	97	3		Micropterus punctulatus	225060	225060	species	Micropterus punctulatus	27705	genus	Micropterus	8180	family	Centrarchidae	1489940	order	Centrarchiformes	186623	class	Actinopteri	7711	phylum	Chordata
C26T3:1:1104:5212:7560	Micropterus salmoides	196	species	97.8571	5		Micropterus salmoides	27706	27706	species	Micropterus salmoides	27705	genus	Micropterus	8180	family	Centrarchidae	1489940	order	Centrarchiformes	186623	class	Actinopteri	7711	phylum	Chordata
C26T3:1:1101:21588:7932	Micropterus salmoides	178	species	98.7143	15		Micropterus salmoides	27706	27706	species	Micropterus salmoides	27705	genus	Micropterus	8180	family	Centrarchidae	1489940	order	Centrarchiformes	186623	class	Actinopteri	7711	phylum	Chordata
C26T3:1:1102:18862:11023	Micropterus salmoides	178	species	98.7143	24		Micropterus salmoides	27706	27706	species	Micropterus salmoides	27705	genus	Micropterus	8180	family	Centrarchidae	1489940	order	Centrarchiformes	186623	class	Actinopteri	7711	phylum	Chordata
C26T3:1:1104:11237:22361	Micropterus salmoides	178	species	98.7143	7		Micropterus salmoides	27706	27706	species	Micropterus salmoides	27705	genus	Micropterus	8180	family	Centrarchidae	1489940	order	Centrarchiformes	186623	class	Actinopteri	7711	phylum	Chordata
C26T3:1:1106:11607:4140	Micropterus salmoides	178	species	98.7143	13		Micropterus salmoides	27706	27706	species	Micropterus salmoides	27705	genus	Micropterus	8180	family	Centrarchidae	1489940	order	Centrarchiformes	186623	class	Actinopteri	7711	phylum	Chordata
C26T3:1:1117:6363:18565	Micropterus salmoides	174	species	99.7143	24		Micropterus salmoides	27706	27706	species	Micropterus salmoides	27705	genus	Micropterus	8180	family	Centrarchidae	1489940	order	Centrarchiformes	186623	class	Actinopteri	7711	phylum	Chordata
C26T3:1:1119:9630:8436	Micropterus salmoides	172	species	97.7143	2		Micropterus salmoides	27706	27706	species	Micropterus salmoides	27705	genus	Micropterus	8180	family	Centrarchidae	1489940	order	Centrarchiformes	186623	class	Actinopteri	7711	phylum	Chordata
C26T3:1:1101:17535:22157	Micropterus salmoides	171	species	99.7143	9		Micropterus salmoides	27706	27706	species	Micropterus salmoides	27705	genus	Micropterus	8180	family	Centrarchidae	1489940	order	Centrarchiformes	186623	class	Actinopteri	7711	phylum	Chordata
C26T3:1:1101:14574:6519	Micropterus salmoides	169	species	98.7143	226		Micropterus salmoides	27706	27706	species	Micropterus salmoides	27705	genus	Micropterus	8180	family	Centrarchidae	1489940	order	Centrarchiformes	186623	class	Actinopteri	7711	phylum	Chordata
C26T3:1:1101:22697:2082	Micropterus salmoides	169	species	97.7143	24		Micropterus salmoides	27706	27706	species	Micropterus salmoides	27705	genus	Micropterus	8180	family	Centrarchidae	1489940	order	Centrarchiformes	186623	class	Actinopteri	7711	phylum	Chordata
C26T3:1:1102:23387:18895	Micropterus salmoides	169	species	98.7143	2		Micropterus salmoides	27706	27706	species	Micropterus salmoides	27705	genus	Micropterus	8180	family	Centrarchidae	1489940	order	Centrarchiformes	186623	class	Actinopteri	7711	phylum	Chordata
C26T3:1:1110:18708:6006	Microtus pennsylvanicus	178	species	99	8		Microtus pennsylvanicus	10058	10058	species	Microtus pennsylvanicus	10053	genus	Microtus	337677	family	Cricetidae	9989	order	Rodentia	40674	class	Mammalia	7711	phylum	Chordata
C26T3:1:2110:28348:15632	Microtus pennsylvanicus	167	species	98	2		Microtus pennsylvanicus	10058	10058	species	Microtus pennsylvanicus	10053	genus	Microtus	337677	family	Cricetidae	9989	order	Rodentia	40674	class	Mammalia	7711	phylum	Chordata
C26T3:1:1102:21489:16013	Microtus pennsylvanicus	165	species	97	5		Microtus pennsylvanicus	10058	10058	species	Microtus pennsylvanicus	10053	genus	Microtus	337677	family	Cricetidae	9989	order	Rodentia	40674	class	Mammalia	7711	phylum	Chordata
C26T3:1:1103:25609:23101	Moxostoma poecilurum	167	species	97	28		Moxostoma poecilurum	154821	154821	species	Moxostoma poecilurum	117934	genus	Moxostoma	7968	family	Catostomidae	7952	order	Cypriniformes	186623	class	Actinopteri	7711	phylum	Chordata
C26T3:1:1104:28296:13507	Moxostoma poecilurum	167	species	97	3		Moxostoma poecilurum	154821	154821	species	Moxostoma poecilurum	117934	genus	Moxostoma	7968	family	Catostomidae	7952	order	Cypriniformes	186623	class	Actinopteri	7711	phylum	Chordata
C26T3:1:1101:7035:18658	Notemigonus crysoleucas	180	species	98.8889	22		Notemigonus crysoleucas	28800	28800	species	Notemigonus crysoleucas	28799	genus	Notemigonus	7953	family	Cyprinidae	7952	order	Cypriniformes	186623	class	Actinopteri	7711	phylum	Chordata
C26T3:1:1107:8344:16990	Notemigonus crysoleucas	171	species	99	7		Notemigonus crysoleucas	28800	28800	species	Notemigonus crysoleucas	28799	genus	Notemigonus	7953	family	Cyprinidae	7952	order	Cypriniformes	186623	class	Actinopteri	7711	phylum	Chordata
C26T3:1:2106:22015:22179	Notemigonus crysoleucas	171	species	99	3		Notemigonus crysoleucas	28800	28800	species	Notemigonus crysoleucas	28799	genus	Notemigonus	7953	family	Cyprinidae	7952	order	Cypriniformes	186623	class	Actinopteri	7711	phylum	Chordata
C26T3:1:1108:5986:13088	Notropis baileyi	169	species	97	11		Notropis baileyi	450203	450203	species	Notropis baileyi	28793	genus	Notropis	7953	family	Cyprinidae	7952	order	Cypriniformes	186623	class	Actinopteri	7711	phylum	Chordata
C26T3:1:1111:16457:19838	Notropis nazas	178	species	98	2		Notropis nazas	232997	232997	species	Notropis nazas	28793	genus	Notropis	7953	family	Cyprinidae	7952	order	Cypriniformes	186623	class	Actinopteri	7711	phylum	Chordata
C26T3:1:1109:7251:14678	Notropis texanus	195	species	97	2		Notropis texanus	156708	156708	species	Notropis texanus	28793	genus	Notropis	7953	family	Cyprinidae	7952	order	Cypriniformes	186623	class	Actinopteri	7711	phylum	Chordata
C26T3:1:2106:3660:8286	Notropis texanus	171	species	97	2		Notropis texanus	156708	156708	species	Notropis texanus	28793	genus	Notropis	7953	family	Cyprinidae	7952	order	Cypriniformes	186623	class	Actinopteri	7711	phylum	Chordata
C26T3:1:1105:12687:1081	Notropis texanus	169	species	97	2		Notropis texanus	156708	156708	species	Notropis texanus	28793	genus	Notropis	7953	family	Cyprinidae	7952	order	Cypriniformes	186623	class	Actinopteri	7711	phylum	Chordata
C26T3:1:1105:17613:7712	Notropis texanus	169	species	97	3		Notropis texanus	156708	156708	species	Notropis texanus	28793	genus	Notropis	7953	family	Cyprinidae	7952	order	Cypriniformes	186623	class	Actinopteri	7711	phylum	Chordata
C26T3:1:1109:10550:16436	Notropis texanus	169	species	97	2		Notropis texanus	156708	156708	species	Notropis texanus	28793	genus	Notropis	7953	family	Cyprinidae	7952	order	Cypriniformes	186623	class	Actinopteri	7711	phylum	Chordata
C26T3:1:1113:18645:19239	Notropis texanus	169	species	98	2		Notropis texanus	156708	156708	species	Notropis texanus	28793	genus	Notropis	7953	family	Cyprinidae	7952	order	Cypriniformes	186623	class	Actinopteri	7711	phylum	Chordata
C26T3:1:1113:24267:6532	Notropis texanus	169	species	97	6		Notropis texanus	156708	156708	species	Notropis texanus	28793	genus	Notropis	7953	family	Cyprinidae	7952	order	Cypriniformes	186623	class	Actinopteri	7711	phylum	Chordata
C26T3:1:1101:24514:14609	Notropis texanus	167	species	97	3		Notropis texanus	156708	156708	species	Notropis texanus	28793	genus	Notropis	7953	family	Cyprinidae	7952	order	Cypriniformes	186623	class	Actinopteri	7711	phylum	Chordata
C26T3:1:1107:10105:14987	Noturus gyrinus	169	species	98	3		Noturus gyrinus	90661	90661	species	Noturus gyrinus	61322	genus	Noturus	7996	family	Ictaluridae	7995	order	Siluriformes	186623	class	Actinopteri	7711	phylum	Chordata
C26T3:1:1109:25110:2887	Noturus gyrinus	167	species	99.5	15		Noturus gyrinus	90661	90661	species	Noturus gyrinus	61322	genus	Noturus	7996	family	Ictaluridae	7995	order	Siluriformes	186623	class	Actinopteri	7711	phylum	Chordata
C26T3:1:1104:14266:13429	Oncorhynchus tshawytscha	172	species	98	4		Oncorhynchus tshawytscha	74940	74940	species	Oncorhynchus tshawytscha	8016	genus	Oncorhynchus	8015	family	Salmonidae	8006	order	Salmoniformes	186623	class	Actinopteri	7711	phylum	Chordata
C26T3:1:2106:17907:3594	Oncorhynchus tshawytscha	165	species	97	2		Oncorhynchus tshawytscha	74940	74940	species	Oncorhynchus tshawytscha	8016	genus	Oncorhynchus	8015	family	Salmonidae	8006	order	Salmoniformes	186623	class	Actinopteri	7711	phylum	Chordata
C26T3:1:1101:16382:5833	Ondatra zibethicus	209	species	98	10		Ondatra zibethicus	10060	10060	species	Ondatra zibethicus	10059	genus	Ondatra	337677	family	Cricetidae	9989	order	Rodentia	40674	class	Mammalia	7711	phylum	Chordata
C26T3:1:1106:15959:23220	Ondatra zibethicus	207	species	98	4		Ondatra zibethicus	10060	10060	species	Ondatra zibethicus	10059	genus	Ondatra	337677	family	Cricetidae	9989	order	Rodentia	40674	class	Mammalia	7711	phylum	Chordata
C26T3:1:1104:28950:10255	Ondatra zibethicus	202	species	97	2		Ondatra zibethicus	10060	10060	species	Ondatra zibethicus	10059	genus	Ondatra	337677	family	Cricetidae	9989	order	Rodentia	40674	class	Mammalia	7711	phylum	Chordata
C26T3:1:1103:5012:16698	Ondatra zibethicus	200	species	97	4		Ondatra zibethicus	10060	10060	species	Ondatra zibethicus	10059	genus	Ondatra	337677	family	Cricetidae	9989	order	Rodentia	40674	class	Mammalia	7711	phylum	Chordata
C26T3:1:1105:13512:20866	Ondatra zibethicus	193	species	98	4		Ondatra zibethicus	10060	10060	species	Ondatra zibethicus	10059	genus	Ondatra	337677	family	Cricetidae	9989	order	Rodentia	40674	class	Mammalia	7711	phylum	Chordata
C26T3:1:1105:18468:16414	Ondatra zibethicus	193	species	98	2		Ondatra zibethicus	10060	10060	species	Ondatra zibethicus	10059	genus	Ondatra	337677	family	Cricetidae	9989	order	Rodentia	40674	class	Mammalia	7711	phylum	Chordata
C26T3:1:2106:23460:17622	Ondatra zibethicus	191	species	98	2		Ondatra zibethicus	10060	10060	species	Ondatra zibethicus	10059	genus	Ondatra	337677	family	Cricetidae	9989	order	Rodentia	40674	class	Mammalia	7711	phylum	Chordata
C26T3:1:1101:16593:13669	Ondatra zibethicus	185	species	98	2		Ondatra zibethicus	10060	10060	species	Ondatra zibethicus	10059	genus	Ondatra	337677	family	Cricetidae	9989	order	Rodentia	40674	class	Mammalia	7711	phylum	Chordata
C26T3:1:1101:10779:24163	Ondatra zibethicus	180	species	98	535		Ondatra zibethicus	10060	10060	species	Ondatra zibethicus	10059	genus	Ondatra	337677	family	Cricetidae	9989	order	Rodentia	40674	class	Mammalia	7711	phylum	Chordata
C26T3:1:1107:28676:8711	Ondatra zibethicus	178	species	97	2		Ondatra zibethicus	10060	10060	species	Ondatra zibethicus	10059	genus	Ondatra	337677	family	Cricetidae	9989	order	Rodentia	40674	class	Mammalia	7711	phylum	Chordata
C26T3:1:1114:18161:24432	Ondatra zibethicus	176	species	97	2		Ondatra zibethicus	10060	10060	species	Ondatra zibethicus	10059	genus	Ondatra	337677	family	Cricetidae	9989	order	Rodentia	40674	class	Mammalia	7711	phylum	Chordata
C26T3:1:1105:21670:19111	Ondatra zibethicus	174	species	97	7		Ondatra zibethicus	10060	10060	species	Ondatra zibethicus	10059	genus	Ondatra	337677	family	Cricetidae	9989	order	Rodentia	40674	class	Mammalia	7711	phylum	Chordata
C26T3:1:1108:24882:12804	Ondatra zibethicus	172	species	97	5		Ondatra zibethicus	10060	10060	species	Ondatra zibethicus	10059	genus	Ondatra	337677	family	Cricetidae	9989	order	Rodentia	40674	class	Mammalia	7711	phylum	Chordata
C26T3:1:2101:6060:11214	Ondatra zibethicus	172	species	97	3		Ondatra zibethicus	10060	10060	species	Ondatra zibethicus	10059	genus	Ondatra	337677	family	Cricetidae	9989	order	Rodentia	40674	class	Mammalia	7711	phylum	Chordata
C26T3:1:1104:20645:17060	Ondatra zibethicus	169	species	98	2		Ondatra zibethicus	10060	10060	species	Ondatra zibethicus	10059	genus	Ondatra	337677	family	Cricetidae	9989	order	Rodentia	40674	class	Mammalia	7711	phylum	Chordata
C26T3:1:1101:21685:21673	Ondatra zibethicus	165	species	98	49		Ondatra zibethicus	10060	10060	species	Ondatra zibethicus	10059	genus	Ondatra	337677	family	Cricetidae	9989	order	Rodentia	40674	class	Mammalia	7711	phylum	Chordata
C26T3:1:1101:15579:22560	Pan troglodytes	165	species	99.0455	3		Pan troglodytes	9598	9598	species	Pan troglodytes	9596	genus	Pan	9604	family	Hominidae	9443	order	Primates	40674	class	Mammalia	7711	phylum	Chordata
C26T3:1:1101:15734:20977	Percina brevicauda	176	species	99	4		Percina brevicauda	163812	163812	species	Percina brevicauda	54316	genus	Percina	8165	family	Percidae	8111	order	Perciformes	186623	class	Actinopteri	7711	phylum	Chordata
C26T3:1:1104:16274:9501	Percina brevicauda	169	species	98	4		Percina brevicauda	163812	163812	species	Percina brevicauda	54316	genus	Percina	8165	family	Percidae	8111	order	Perciformes	186623	class	Actinopteri	7711	phylum	Chordata
C26T3:1:1109:19007:10910	Percina brevicauda	169	species	98	7		Percina brevicauda	163812	163812	species	Percina brevicauda	54316	genus	Percina	8165	family	Percidae	8111	order	Perciformes	186623	class	Actinopteri	7711	phylum	Chordata
C26T3:1:2102:11929:12130	Percina brevicauda	165	species	97	2		Percina brevicauda	163812	163812	species	Percina brevicauda	54316	genus	Percina	8165	family	Percidae	8111	order	Perciformes	186623	class	Actinopteri	7711	phylum	Chordata
C26T3:1:1102:8488:19233	Percina copelandi	193	species	97	2		Percina copelandi	54323	54323	species	Percina copelandi	54316	genus	Percina	8165	family	Percidae	8111	order	Perciformes	186623	class	Actinopteri	7711	phylum	Chordata
C26T3:1:1102:7910:18817	Percina copelandi	171	species	98	216		Percina copelandi	54323	54323	species	Percina copelandi	54316	genus	Percina	8165	family	Percidae	8111	order	Perciformes	186623	class	Actinopteri	7711	phylum	Chordata
C26T3:1:1105:11096:3548	Percina copelandi	169	species	98	2		Percina copelandi	54323	54323	species	Percina copelandi	54316	genus	Percina	8165	family	Percidae	8111	order	Perciformes	186623	class	Actinopteri	7711	phylum	Chordata
C26T3:1:2112:5057:11838	Percina copelandi	169	species	98	3		Percina copelandi	54323	54323	species	Percina copelandi	54316	genus	Percina	8165	family	Percidae	8111	order	Perciformes	186623	class	Actinopteri	7711	phylum	Chordata
C26T3:1:1111:7632:19725	Percina copelandi	167	species	98	2		Percina copelandi	54323	54323	species	Percina copelandi	54316	genus	Percina	8165	family	Percidae	8111	order	Perciformes	186623	class	Actinopteri	7711	phylum	Chordata
C26T3:1:2114:9634:2741	Percina copelandi	167	species	98	5		Percina copelandi	54323	54323	species	Percina copelandi	54316	genus	Percina	8165	family	Percidae	8111	order	Perciformes	186623	class	Actinopteri	7711	phylum	Chordata
C26T3:1:1102:15884:17032	Percina crypta	169	species	98	23		Percina crypta	1070206	1070206	species	Percina crypta	54316	genus	Percina	8165	family	Percidae	8111	order	Perciformes	186623	class	Actinopteri	7711	phylum	Chordata
C26T3:1:1104:18575:13398	Percina macrolepida	200	species	97	2		Percina macrolepida	163822	163822	species	Percina macrolepida	54316	genus	Percina	8165	family	Percidae	8111	order	Perciformes	186623	class	Actinopteri	7711	phylum	Chordata
C26T3:1:1108:3523:8613	Percina macrolepida	200	species	97	3		Percina macrolepida	163822	163822	species	Percina macrolepida	54316	genus	Percina	8165	family	Percidae	8111	order	Perciformes	186623	class	Actinopteri	7711	phylum	Chordata
C26T3:1:2103:18942:4475	Percina macrolepida	193	species	98	2		Percina macrolepida	163822	163822	species	Percina macrolepida	54316	genus	Percina	8165	family	Percidae	8111	order	Perciformes	186623	class	Actinopteri	7711	phylum	Chordata
C26T3:1:1117:3585:16988	Percina macrolepida	183	species	97	2		Percina macrolepida	163822	163822	species	Percina macrolepida	54316	genus	Percina	8165	family	Percidae	8111	order	Perciformes	186623	class	Actinopteri	7711	phylum	Chordata
C26T3:1:1103:8207:14546	Percina macrolepida	169	species	97	2		Percina macrolepida	163822	163822	species	Percina macrolepida	54316	genus	Percina	8165	family	Percidae	8111	order	Perciformes	186623	class	Actinopteri	7711	phylum	Chordata
C26T3:1:1101:12147:5755	Percina rex	178	species	99	53		Percina rex	163830	163830	species	Percina rex	54316	genus	Percina	8165	family	Percidae	8111	order	Perciformes	186623	class	Actinopteri	7711	phylum	Chordata
C26T3:1:1101:13084:2200	Percina rex	178	species	99	75		Percina rex	163830	163830	species	Percina rex	54316	genus	Percina	8165	family	Percidae	8111	order	Perciformes	186623	class	Actinopteri	7711	phylum	Chordata
C26T3:1:1101:13545:15840	Percina rex	178	species	99	155		Percina rex	163830	163830	species	Percina rex	54316	genus	Percina	8165	family	Percidae	8111	order	Perciformes	186623	class	Actinopteri	7711	phylum	Chordata
C26T3:1:1103:21434:8358	Percina rex	178	species	99	6		Percina rex	163830	163830	species	Percina rex	54316	genus	Percina	8165	family	Percidae	8111	order	Perciformes	186623	class	Actinopteri	7711	phylum	Chordata
C26T3:1:1107:20035:8770	Percina rex	178	species	99	3		Percina rex	163830	163830	species	Percina rex	54316	genus	Percina	8165	family	Percidae	8111	order	Perciformes	186623	class	Actinopteri	7711	phylum	Chordata
C26T3:1:1101:16919:21962	Percina rex	171	species	100	39		Percina rex	163830	163830	species	Percina rex	54316	genus	Percina	8165	family	Percidae	8111	order	Perciformes	186623	class	Actinopteri	7711	phylum	Chordata
C26T3:1:1101:18611:6945	Percina rex	171	species	99	2		Percina rex	163830	163830	species	Percina rex	54316	genus	Percina	8165	family	Percidae	8111	order	Perciformes	186623	class	Actinopteri	7711	phylum	Chordata
C26T3:1:1102:8098:4794	Percina rex	171	species	100	28		Percina rex	163830	163830	species	Percina rex	54316	genus	Percina	8165	family	Percidae	8111	order	Perciformes	186623	class	Actinopteri	7711	phylum	Chordata
C26T3:1:1103:18725:2648	Percina rex	171	species	98	3		Percina rex	163830	163830	species	Percina rex	54316	genus	Percina	8165	family	Percidae	8111	order	Perciformes	186623	class	Actinopteri	7711	phylum	Chordata
C26T3:1:1104:12880:10784	Percina rex	171	species	98	2		Percina rex	163830	163830	species	Percina rex	54316	genus	Percina	8165	family	Percidae	8111	order	Perciformes	186623	class	Actinopteri	7711	phylum	Chordata
C26T3:1:1107:11263:5580	Percina rex	171	species	98	6		Percina rex	163830	163830	species	Percina rex	54316	genus	Percina	8165	family	Percidae	8111	order	Perciformes	186623	class	Actinopteri	7711	phylum	Chordata
C26T3:1:1109:18177:17851	Percina rex	171	species	98	2		Percina rex	163830	163830	species	Percina rex	54316	genus	Percina	8165	family	Percidae	8111	order	Perciformes	186623	class	Actinopteri	7711	phylum	Chordata
C26T3:1:1110:27372:14032	Percina rex	171	species	98	9		Percina rex	163830	163830	species	Percina rex	54316	genus	Percina	8165	family	Percidae	8111	order	Perciformes	186623	class	Actinopteri	7711	phylum	Chordata
C26T3:1:1116:18406:13305	Percina rex	171	species	98	3		Percina rex	163830	163830	species	Percina rex	54316	genus	Percina	8165	family	Percidae	8111	order	Perciformes	186623	class	Actinopteri	7711	phylum	Chordata
C26T3:1:1117:16817:7548	Percina rex	171	species	98	2		Percina rex	163830	163830	species	Percina rex	54316	genus	Percina	8165	family	Percidae	8111	order	Perciformes	186623	class	Actinopteri	7711	phylum	Chordata
C26T3:1:2113:11211:18461	Percina rex	171	species	100	2		Percina rex	163830	163830	species	Percina rex	54316	genus	Percina	8165	family	Percidae	8111	order	Perciformes	186623	class	Actinopteri	7711	phylum	Chordata
C26T3:1:1106:16937:11918	Percina rex	169	species	98	2		Percina rex	163830	163830	species	Percina rex	54316	genus	Percina	8165	family	Percidae	8111	order	Perciformes	186623	class	Actinopteri	7711	phylum	Chordata
C26T3:1:1113:11491:4143	Percina rex	169	species	99	19		Percina rex	163830	163830	species	Percina rex	54316	genus	Percina	8165	family	Percidae	8111	order	Perciformes	186623	class	Actinopteri	7711	phylum	Chordata
C26T3:1:1115:14528:14953	Percina rex	169	species	98	5		Percina rex	163830	163830	species	Percina rex	54316	genus	Percina	8165	family	Percidae	8111	order	Perciformes	186623	class	Actinopteri	7711	phylum	Chordata
C26T3:1:2102:4491:13016	Percina rex	169	species	98	2		Percina rex	163830	163830	species	Percina rex	54316	genus	Percina	8165	family	Percidae	8111	order	Perciformes	186623	class	Actinopteri	7711	phylum	Chordata
C26T3:1:2103:14612:7504	Percina rex	169	species	98	2		Percina rex	163830	163830	species	Percina rex	54316	genus	Percina	8165	family	Percidae	8111	order	Perciformes	186623	class	Actinopteri	7711	phylum	Chordata
C26T3:1:2105:20376:15124	Percina rex	169	species	98	2		Percina rex	163830	163830	species	Percina rex	54316	genus	Percina	8165	family	Percidae	8111	order	Perciformes	186623	class	Actinopteri	7711	phylum	Chordata
C26T3:1:1101:11278:4709	Percina rex	167	species	100	29		Percina rex	163830	163830	species	Percina rex	54316	genus	Percina	8165	family	Percidae	8111	order	Perciformes	186623	class	Actinopteri	7711	phylum	Chordata
C26T3:1:1101:24327:18040	Percina rex	167	species	97	33		Percina rex	163830	163830	species	Percina rex	54316	genus	Percina	8165	family	Percidae	8111	order	Perciformes	186623	class	Actinopteri	7711	phylum	Chordata
C26T3:1:1102:18466:6298	Percina rex	167	species	97	32		Percina rex	163830	163830	species	Percina rex	54316	genus	Percina	8165	family	Percidae	8111	order	Perciformes	186623	class	Actinopteri	7711	phylum	Chordata
C26T3:1:1108:3272:12815	Percina rex	167	species	100	31		Percina rex	163830	163830	species	Percina rex	54316	genus	Percina	8165	family	Percidae	8111	order	Perciformes	186623	class	Actinopteri	7711	phylum	Chordata
C26T3:1:1111:14896:16469	Percina rex	167	species	100	4		Percina rex	163830	163830	species	Percina rex	54316	genus	Percina	8165	family	Percidae	8111	order	Perciformes	186623	class	Actinopteri	7711	phylum	Chordata
C26T3:1:1114:24666:21259	Percina rex	167	species	97	2		Percina rex	163830	163830	species	Percina rex	54316	genus	Percina	8165	family	Percidae	8111	order	Perciformes	186623	class	Actinopteri	7711	phylum	Chordata
C26T3:1:1114:9714:19198	Percina rex	167	species	98	3		Percina rex	163830	163830	species	Percina rex	54316	genus	Percina	8165	family	Percidae	8111	order	Perciformes	186623	class	Actinopteri	7711	phylum	Chordata
C26T3:1:2112:14871:4535	Percina rex	167	species	97	2		Percina rex	163830	163830	species	Percina rex	54316	genus	Percina	8165	family	Percidae	8111	order	Perciformes	186623	class	Actinopteri	7711	phylum	Chordata
C26T3:1:2114:3509:13740	Percina rex	167	species	97	2		Percina rex	163830	163830	species	Percina rex	54316	genus	Percina	8165	family	Percidae	8111	order	Perciformes	186623	class	Actinopteri	7711	phylum	Chordata
C26T3:1:1103:6635:6748	Percina rex	165	species	100	3		Percina rex	163830	163830	species	Percina rex	54316	genus	Percina	8165	family	Percidae	8111	order	Perciformes	186623	class	Actinopteri	7711	phylum	Chordata
C26T3:1:1110:15724:14953	Percina rex	165	species	99	4		Percina rex	163830	163830	species	Percina rex	54316	genus	Percina	8165	family	Percidae	8111	order	Perciformes	186623	class	Actinopteri	7711	phylum	Chordata
C26T3:1:1112:9037:17194	Percina rex	165	species	100	2		Percina rex	163830	163830	species	Percina rex	54316	genus	Percina	8165	family	Percidae	8111	order	Perciformes	186623	class	Actinopteri	7711	phylum	Chordata
C26T3:1:2110:20885:25112	Percina rex	165	species	97	3		Percina rex	163830	163830	species	Percina rex	54316	genus	Percina	8165	family	Percidae	8111	order	Perciformes	186623	class	Actinopteri	7711	phylum	Chordata
C26T3:1:1113:17671:13461	Pomoxis nigromaculatus	174	species	99.8571	2		Pomoxis nigromaculatus	8182	8182	species	Pomoxis nigromaculatus	8181	genus	Pomoxis	8180	family	Centrarchidae	1489940	order	Centrarchiformes	186623	class	Actinopteri	7711	phylum	Chordata
C26T3:1:1105:9021:7692	Primates	171	order	96.2	11		Primates	9443	9443	order	Primates	40674	class	Mammalia	7711	phylum	Chordata
C26T3:1:1110:20257:4987	Primates	154	order	94.4	2		Primates	9443	9443	order	Primates	40674	class	Mammalia	7711	phylum	Chordata
C26T3:1:1102:14528:7083	Primates	145	order	90.7273	4		Primates	9443	9443	order	Primates	40674	class	Mammalia	7711	phylum	Chordata
C26T3:1:1109:8056:3504	Primates	119	order	98.25	2		Primates	9443	9443	order	Primates	40674	class	Mammalia	7711	phylum	Chordata
C26T3:1:1109:28739:15479	Procyon lotor	211	species	99.125	2		Procyon lotor	9654	9654	species	Procyon lotor	9653	genus	Procyon	9647	family	Procyonidae	33554	order	Carnivora	40674	class	Mammalia	7711	phylum	Chordata
C26T3:1:1112:21267:2380	Procyon lotor	206	species	98.1765	2		Procyon lotor	9654	9654	species	Procyon lotor	9653	genus	Procyon	9647	family	Procyonidae	33554	order	Carnivora	40674	class	Mammalia	7711	phylum	Chordata
C26T3:1:1112:29142:12040	Procyon lotor	180	species	99	3		Procyon lotor	9654	9654	species	Procyon lotor	9653	genus	Procyon	9647	family	Procyonidae	33554	order	Carnivora	40674	class	Mammalia	7711	phylum	Chordata
C26T3:1:1103:5662:10470	Procyon lotor	176	species	99	31		Procyon lotor	9654	9654	species	Procyon lotor	9653	genus	Procyon	9647	family	Procyonidae	33554	order	Carnivora	40674	class	Mammalia	7711	phylum	Chordata
C26T3:1:1109:12162:18648	Procyon lotor	167	species	99	4		Procyon lotor	9654	9654	species	Procyon lotor	9653	genus	Procyon	9647	family	Procyonidae	33554	order	Carnivora	40674	class	Mammalia	7711	phylum	Chordata
C26T3:1:1113:11438:16355	Puma concolor	195	species	99.913	4		Puma concolor	9696	9696	species	Puma concolor	146712	genus	Puma	9681	family	Felidae	33554	order	Carnivora	40674	class	Mammalia	7711	phylum	Chordata
C26T3:1:1110:8170:13606	Puma concolor	182	species	98.913	2		Puma concolor	9696	9696	species	Puma concolor	146712	genus	Puma	9681	family	Felidae	33554	order	Carnivora	40674	class	Mammalia	7711	phylum	Chordata
C26T3:1:1106:8262:4082	Puma concolor	180	species	98.9167	14		Puma concolor	9696	9696	species	Puma concolor	146712	genus	Puma	9681	family	Felidae	33554	order	Carnivora	40674	class	Mammalia	7711	phylum	Chordata
C26T3:1:1102:15083:22504	Puma concolor	171	species	98.75	18		Puma concolor	9696	9696	species	Puma concolor	146712	genus	Puma	9681	family	Felidae	33554	order	Carnivora	40674	class	Mammalia	7711	phylum	Chordata
C26T3:1:1102:26907:18594	Relictus solitarius	167	species	97	15		Relictus solitarius	71771	71771	species	Relictus solitarius	71770	genus	Relictus	7953	family	Cyprinidae	7952	order	Cypriniformes	186623	class	Actinopteri	7711	phylum	Chordata
C26T3:1:2112:23096:8785	Rhinichthys cataractae	180	species	99	3		Rhinichthys cataractae	340988	340988	species	Rhinichthys cataractae	67555	genus	Rhinichthys	7953	family	Cyprinidae	7952	order	Cypriniformes	186623	class	Actinopteri	7711	phylum	Chordata
C26T3:1:2103:13196:15921	Rhinichthys cataractae	165	species	98	2		Rhinichthys cataractae	340988	340988	species	Rhinichthys cataractae	67555	genus	Rhinichthys	7953	family	Cyprinidae	7952	order	Cypriniformes	186623	class	Actinopteri	7711	phylum	Chordata
C26T3:1:1106:13274:22412	Sander vitreus	206	species	98	8		Sander vitreus	283036	283036	species	Sander vitreus	283033	genus	Sander	8165	family	Percidae	8111	order	Perciformes	186623	class	Actinopteri	7711	phylum	Chordata
C26T3:1:1106:3907:15843	Sander vitreus	206	species	98	2		Sander vitreus	283036	283036	species	Sander vitreus	283033	genus	Sander	8165	family	Percidae	8111	order	Perciformes	186623	class	Actinopteri	7711	phylum	Chordata
C26T3:1:1102:5603:12090	Sander vitreus	202	species	98	8		Sander vitreus	283036	283036	species	Sander vitreus	283033	genus	Sander	8165	family	Percidae	8111	order	Perciformes	186623	class	Actinopteri	7711	phylum	Chordata
C26T3:1:1102:17490:7269	Sander vitreus	200	species	97	3		Sander vitreus	283036	283036	species	Sander vitreus	283033	genus	Sander	8165	family	Percidae	8111	order	Perciformes	186623	class	Actinopteri	7711	phylum	Chordata
C26T3:1:1102:4389:16125	Sander vitreus	200	species	97	5		Sander vitreus	283036	283036	species	Sander vitreus	283033	genus	Sander	8165	family	Percidae	8111	order	Perciformes	186623	class	Actinopteri	7711	phylum	Chordata
C26T3:1:1113:15044:2562	Sander vitreus	200	species	97	2		Sander vitreus	283036	283036	species	Sander vitreus	283033	genus	Sander	8165	family	Percidae	8111	order	Perciformes	186623	class	Actinopteri	7711	phylum	Chordata
C26T3:1:1114:12631:14730	Sander vitreus	198	species	97	2		Sander vitreus	283036	283036	species	Sander vitreus	283033	genus	Sander	8165	family	Percidae	8111	order	Perciformes	186623	class	Actinopteri	7711	phylum	Chordata
C26T3:1:1118:26075:14206	Sander vitreus	196	species	98	2		Sander vitreus	283036	283036	species	Sander vitreus	283033	genus	Sander	8165	family	Percidae	8111	order	Perciformes	186623	class	Actinopteri	7711	phylum	Chordata
C26T3:1:1101:1743:12430	Sander vitreus	195	species	97	2		Sander vitreus	283036	283036	species	Sander vitreus	283033	genus	Sander	8165	family	Percidae	8111	order	Perciformes	186623	class	Actinopteri	7711	phylum	Chordata
C26T3:1:1111:11086:17275	Sander vitreus	195	species	98	4		Sander vitreus	283036	283036	species	Sander vitreus	283033	genus	Sander	8165	family	Percidae	8111	order	Perciformes	186623	class	Actinopteri	7711	phylum	Chordata
C26T3:1:1105:15888:1285	Sander vitreus	189	species	99	3		Sander vitreus	283036	283036	species	Sander vitreus	283033	genus	Sander	8165	family	Percidae	8111	order	Perciformes	186623	class	Actinopteri	7711	phylum	Chordata
C26T3:1:1113:25255:6091	Sander vitreus	189	species	99	3		Sander vitreus	283036	283036	species	Sander vitreus	283033	genus	Sander	8165	family	Percidae	8111	order	Perciformes	186623	class	Actinopteri	7711	phylum	Chordata
C26T3:1:1109:10395:23316	Sander vitreus	187	species	99	2		Sander vitreus	283036	283036	species	Sander vitreus	283033	genus	Sander	8165	family	Percidae	8111	order	Perciformes	186623	class	Actinopteri	7711	phylum	Chordata
C26T3:1:1114:13812:15661	Sander vitreus	185	species	99	2		Sander vitreus	283036	283036	species	Sander vitreus	283033	genus	Sander	8165	family	Percidae	8111	order	Perciformes	186623	class	Actinopteri	7711	phylum	Chordata
C26T3:1:2113:7849:3732	Sander vitreus	180	species	99	5		Sander vitreus	283036	283036	species	Sander vitreus	283033	genus	Sander	8165	family	Percidae	8111	order	Perciformes	186623	class	Actinopteri	7711	phylum	Chordata
C26T3:1:1101:10252:14840	Sander vitreus	178	species	99	284		Sander vitreus	283036	283036	species	Sander vitreus	283033	genus	Sander	8165	family	Percidae	8111	order	Perciformes	186623	class	Actinopteri	7711	phylum	Chordata
C26T3:1:1101:10373:20827	Sander vitreus	178	species	99	110		Sander vitreus	283036	283036	species	Sander vitreus	283033	genus	Sander	8165	family	Percidae	8111	order	Perciformes	186623	class	Actinopteri	7711	phylum	Chordata
C26T3:1:1103:5841:22639	Sander vitreus	178	species	98	3		Sander vitreus	283036	283036	species	Sander vitreus	283033	genus	Sander	8165	family	Percidae	8111	order	Perciformes	186623	class	Actinopteri	7711	phylum	Chordata
C26T3:1:1109:23542:14947	Sander vitreus	178	species	99	5		Sander vitreus	283036	283036	species	Sander vitreus	283033	genus	Sander	8165	family	Percidae	8111	order	Perciformes	186623	class	Actinopteri	7711	phylum	Chordata
C26T3:1:1111:27182:19360	Sander vitreus	176	species	98	2		Sander vitreus	283036	283036	species	Sander vitreus	283033	genus	Sander	8165	family	Percidae	8111	order	Perciformes	186623	class	Actinopteri	7711	phylum	Chordata
C26T3:1:2102:5843:15785	Sander vitreus	176	species	99	2		Sander vitreus	283036	283036	species	Sander vitreus	283033	genus	Sander	8165	family	Percidae	8111	order	Perciformes	186623	class	Actinopteri	7711	phylum	Chordata
C26T3:1:2106:23716:19921	Sander vitreus	176	species	99	19		Sander vitreus	283036	283036	species	Sander vitreus	283033	genus	Sander	8165	family	Percidae	8111	order	Perciformes	186623	class	Actinopteri	7711	phylum	Chordata
C26T3:1:1101:12901:20724	Sander vitreus	174	species	98.04	67		Sander vitreus	283036	283036	species	Sander vitreus	283033	genus	Sander	8165	family	Percidae	8111	order	Perciformes	186623	class	Actinopteri	7711	phylum	Chordata
C26T3:1:1102:11055:6207	Sander vitreus	174	species	100	29		Sander vitreus	283036	283036	species	Sander vitreus	283033	genus	Sander	8165	family	Percidae	8111	order	Perciformes	186623	class	Actinopteri	7711	phylum	Chordata
C26T3:1:1102:15865:24378	Sander vitreus	174	species	99	24		Sander vitreus	283036	283036	species	Sander vitreus	283033	genus	Sander	8165	family	Percidae	8111	order	Perciformes	186623	class	Actinopteri	7711	phylum	Chordata
C26T3:1:1110:19151:12056	Sander vitreus	174	species	99	6		Sander vitreus	283036	283036	species	Sander vitreus	283033	genus	Sander	8165	family	Percidae	8111	order	Perciformes	186623	class	Actinopteri	7711	phylum	Chordata
C26T3:1:1105:16215:14419	Sander vitreus	172	species	98	2		Sander vitreus	283036	283036	species	Sander vitreus	283033	genus	Sander	8165	family	Percidae	8111	order	Perciformes	186623	class	Actinopteri	7711	phylum	Chordata
C26T3:1:1106:24897:3865	Sander vitreus	172	species	98	2		Sander vitreus	283036	283036	species	Sander vitreus	283033	genus	Sander	8165	family	Percidae	8111	order	Perciformes	186623	class	Actinopteri	7711	phylum	Chordata
C26T3:1:1113:26976:16235	Sander vitreus	172	species	98	6		Sander vitreus	283036	283036	species	Sander vitreus	283033	genus	Sander	8165	family	Percidae	8111	order	Perciformes	186623	class	Actinopteri	7711	phylum	Chordata
C26T3:1:1117:7743:9778	Sander vitreus	172	species	98	2		Sander vitreus	283036	283036	species	Sander vitreus	283033	genus	Sander	8165	family	Percidae	8111	order	Perciformes	186623	class	Actinopteri	7711	phylum	Chordata
C26T3:1:2101:7675:17817	Sander vitreus	172	species	98	2		Sander vitreus	283036	283036	species	Sander vitreus	283033	genus	Sander	8165	family	Percidae	8111	order	Perciformes	186623	class	Actinopteri	7711	phylum	Chordata
C26T3:1:2105:25042:10432	Sander vitreus	172	species	98	2		Sander vitreus	283036	283036	species	Sander vitreus	283033	genus	Sander	8165	family	Percidae	8111	order	Perciformes	186623	class	Actinopteri	7711	phylum	Chordata
C26T3:1:2105:27250:8695	Sander vitreus	172	species	98	13		Sander vitreus	283036	283036	species	Sander vitreus	283033	genus	Sander	8165	family	Percidae	8111	order	Perciformes	186623	class	Actinopteri	7711	phylum	Chordata
C26T3:1:2107:24756:13097	Sander vitreus	172	species	98	10		Sander vitreus	283036	283036	species	Sander vitreus	283033	genus	Sander	8165	family	Percidae	8111	order	Perciformes	186623	class	Actinopteri	7711	phylum	Chordata
C26T3:1:1104:11883:5064	Sander vitreus	171	species	99	24		Sander vitreus	283036	283036	species	Sander vitreus	283033	genus	Sander	8165	family	Percidae	8111	order	Perciformes	186623	class	Actinopteri	7711	phylum	Chordata
C26T3:1:1104:2511:16743	Sander vitreus	171	species	100	7		Sander vitreus	283036	283036	species	Sander vitreus	283033	genus	Sander	8165	family	Percidae	8111	order	Perciformes	186623	class	Actinopteri	7711	phylum	Chordata
C26T3:1:1104:28141:14036	Sander vitreus	171	species	99	329		Sander vitreus	283036	283036	species	Sander vitreus	283033	genus	Sander	8165	family	Percidae	8111	order	Perciformes	186623	class	Actinopteri	7711	phylum	Chordata
C26T3:1:1116:29210:11512	Sander vitreus	171	species	98	2		Sander vitreus	283036	283036	species	Sander vitreus	283033	genus	Sander	8165	family	Percidae	8111	order	Perciformes	186623	class	Actinopteri	7711	phylum	Chordata
C26T3:1:1101:10845:5979	Sander vitreus	169	species	98	6		Sander vitreus	283036	283036	species	Sander vitreus	283033	genus	Sander	8165	family	Percidae	8111	order	Perciformes	186623	class	Actinopteri	7711	phylum	Chordata
C26T3:1:1101:14267:24523	Sander vitreus	169	species	98	20		Sander vitreus	283036	283036	species	Sander vitreus	283033	genus	Sander	8165	family	Percidae	8111	order	Perciformes	186623	class	Actinopteri	7711	phylum	Chordata
C26T3:1:1101:16175:1751	Sander vitreus	169	species	98	2		Sander vitreus	283036	283036	species	Sander vitreus	283033	genus	Sander	8165	family	Percidae	8111	order	Perciformes	186623	class	Actinopteri	7711	phylum	Chordata
C26T3:1:1101:18264:21650	Sander vitreus	169	species	98	3		Sander vitreus	283036	283036	species	Sander vitreus	283033	genus	Sander	8165	family	Percidae	8111	order	Perciformes	186623	class	Actinopteri	7711	phylum	Chordata
C26T3:1:1101:23555:4864	Sander vitreus	169	species	98	5		Sander vitreus	283036	283036	species	Sander vitreus	283033	genus	Sander	8165	family	Percidae	8111	order	Perciformes	186623	class	Actinopteri	7711	phylum	Chordata
C26T3:1:1102:22103:23440	Sander vitreus	169	species	98	20		Sander vitreus	283036	283036	species	Sander vitreus	283033	genus	Sander	8165	family	Percidae	8111	order	Perciformes	186623	class	Actinopteri	7711	phylum	Chordata
C26T3:1:1102:22637:8220	Sander vitreus	169	species	98	2		Sander vitreus	283036	283036	species	Sander vitreus	283033	genus	Sander	8165	family	Percidae	8111	order	Perciformes	186623	class	Actinopteri	7711	phylum	Chordata
C26T3:1:1102:25679:10853	Sander vitreus	169	species	98	2		Sander vitreus	283036	283036	species	Sander vitreus	283033	genus	Sander	8165	family	Percidae	8111	order	Perciformes	186623	class	Actinopteri	7711	phylum	Chordata
C26T3:1:1103:18991:18235	Sander vitreus	169	species	98	14		Sander vitreus	283036	283036	species	Sander vitreus	283033	genus	Sander	8165	family	Percidae	8111	order	Perciformes	186623	class	Actinopteri	7711	phylum	Chordata
C26T3:1:1104:16046:21321	Sander vitreus	169	species	98	3		Sander vitreus	283036	283036	species	Sander vitreus	283033	genus	Sander	8165	family	Percidae	8111	order	Perciformes	186623	class	Actinopteri	7711	phylum	Chordata
C26T3:1:1104:16980:3724	Sander vitreus	169	species	98	7		Sander vitreus	283036	283036	species	Sander vitreus	283033	genus	Sander	8165	family	Percidae	8111	order	Perciformes	186623	class	Actinopteri	7711	phylum	Chordata
C26T3:1:1104:25815:8254	Sander vitreus	169	species	98	3		Sander vitreus	283036	283036	species	Sander vitreus	283033	genus	Sander	8165	family	Percidae	8111	order	Perciformes	186623	class	Actinopteri	7711	phylum	Chordata
C26T3:1:1105:25897:16323	Sander vitreus	169	species	98	2		Sander vitreus	283036	283036	species	Sander vitreus	283033	genus	Sander	8165	family	Percidae	8111	order	Perciformes	186623	class	Actinopteri	7711	phylum	Chordata
C26T3:1:1106:13306:18100	Sander vitreus	169	species	98	2		Sander vitreus	283036	283036	species	Sander vitreus	283033	genus	Sander	8165	family	Percidae	8111	order	Perciformes	186623	class	Actinopteri	7711	phylum	Chordata
C26T3:1:1107:12818:11893	Sander vitreus	169	species	98	2		Sander vitreus	283036	283036	species	Sander vitreus	283033	genus	Sander	8165	family	Percidae	8111	order	Perciformes	186623	class	Actinopteri	7711	phylum	Chordata
C26T3:1:1107:5974:20491	Sander vitreus	169	species	98	2		Sander vitreus	283036	283036	species	Sander vitreus	283033	genus	Sander	8165	family	Percidae	8111	order	Perciformes	186623	class	Actinopteri	7711	phylum	Chordata
C26T3:1:1108:20458:12915	Sander vitreus	169	species	98	2		Sander vitreus	283036	283036	species	Sander vitreus	283033	genus	Sander	8165	family	Percidae	8111	order	Perciformes	186623	class	Actinopteri	7711	phylum	Chordata
C26T3:1:1109:10175:9145	Sander vitreus	169	species	98	3		Sander vitreus	283036	283036	species	Sander vitreus	283033	genus	Sander	8165	family	Percidae	8111	order	Perciformes	186623	class	Actinopteri	7711	phylum	Chordata
C26T3:1:1109:19162:11635	Sander vitreus	169	species	98	2		Sander vitreus	283036	283036	species	Sander vitreus	283033	genus	Sander	8165	family	Percidae	8111	order	Perciformes	186623	class	Actinopteri	7711	phylum	Chordata
C26T3:1:1109:23185:21824	Sander vitreus	169	species	98	2		Sander vitreus	283036	283036	species	Sander vitreus	283033	genus	Sander	8165	family	Percidae	8111	order	Perciformes	186623	class	Actinopteri	7711	phylum	Chordata
C26T3:1:1111:4055:19139	Sander vitreus	169	species	99	2		Sander vitreus	283036	283036	species	Sander vitreus	283033	genus	Sander	8165	family	Percidae	8111	order	Perciformes	186623	class	Actinopteri	7711	phylum	Chordata
C26T3:1:1112:7535:6444	Sander vitreus	169	species	98	4		Sander vitreus	283036	283036	species	Sander vitreus	283033	genus	Sander	8165	family	Percidae	8111	order	Perciformes	186623	class	Actinopteri	7711	phylum	Chordata
C26T3:1:1113:17904:24684	Sander vitreus	169	species	98	2		Sander vitreus	283036	283036	species	Sander vitreus	283033	genus	Sander	8165	family	Percidae	8111	order	Perciformes	186623	class	Actinopteri	7711	phylum	Chordata
C26T3:1:1114:19095:20379	Sander vitreus	169	species	98	2		Sander vitreus	283036	283036	species	Sander vitreus	283033	genus	Sander	8165	family	Percidae	8111	order	Perciformes	186623	class	Actinopteri	7711	phylum	Chordata
C26T3:1:1115:9575:20311	Sander vitreus	169	species	98	2		Sander vitreus	283036	283036	species	Sander vitreus	283033	genus	Sander	8165	family	Percidae	8111	order	Perciformes	186623	class	Actinopteri	7711	phylum	Chordata
C26T3:1:1116:13603:3826	Sander vitreus	169	species	98	2		Sander vitreus	283036	283036	species	Sander vitreus	283033	genus	Sander	8165	family	Percidae	8111	order	Perciformes	186623	class	Actinopteri	7711	phylum	Chordata
C26T3:1:2103:18184:5408	Sander vitreus	169	species	98	4		Sander vitreus	283036	283036	species	Sander vitreus	283033	genus	Sander	8165	family	Percidae	8111	order	Perciformes	186623	class	Actinopteri	7711	phylum	Chordata
C26T3:1:2104:15867:10814	Sander vitreus	169	species	98	2		Sander vitreus	283036	283036	species	Sander vitreus	283033	genus	Sander	8165	family	Percidae	8111	order	Perciformes	186623	class	Actinopteri	7711	phylum	Chordata
C26T3:1:2105:21343:13418	Sander vitreus	169	species	98	2		Sander vitreus	283036	283036	species	Sander vitreus	283033	genus	Sander	8165	family	Percidae	8111	order	Perciformes	186623	class	Actinopteri	7711	phylum	Chordata
C26T3:1:2106:12792:5656	Sander vitreus	169	species	98	2		Sander vitreus	283036	283036	species	Sander vitreus	283033	genus	Sander	8165	family	Percidae	8111	order	Perciformes	186623	class	Actinopteri	7711	phylum	Chordata
C26T3:1:2108:26691:9466	Sander vitreus	169	species	98	2		Sander vitreus	283036	283036	species	Sander vitreus	283033	genus	Sander	8165	family	Percidae	8111	order	Perciformes	186623	class	Actinopteri	7711	phylum	Chordata
C26T3:1:1102:7988:19305	Sander vitreus	167	species	98	7		Sander vitreus	283036	283036	species	Sander vitreus	283033	genus	Sander	8165	family	Percidae	8111	order	Perciformes	186623	class	Actinopteri	7711	phylum	Chordata
C26T3:1:1103:11795:21412	Sander vitreus	167	species	97	2		Sander vitreus	283036	283036	species	Sander vitreus	283033	genus	Sander	8165	family	Percidae	8111	order	Perciformes	186623	class	Actinopteri	7711	phylum	Chordata
C26T3:1:1105:14538:1280	Sander vitreus	167	species	97	2		Sander vitreus	283036	283036	species	Sander vitreus	283033	genus	Sander	8165	family	Percidae	8111	order	Perciformes	186623	class	Actinopteri	7711	phylum	Chordata
C26T3:1:1106:26251:8291	Sander vitreus	167	species	97	2		Sander vitreus	283036	283036	species	Sander vitreus	283033	genus	Sander	8165	family	Percidae	8111	order	Perciformes	186623	class	Actinopteri	7711	phylum	Chordata
C26T3:1:1109:12965:8447	Sander vitreus	167	species	97	5		Sander vitreus	283036	283036	species	Sander vitreus	283033	genus	Sander	8165	family	Percidae	8111	order	Perciformes	186623	class	Actinopteri	7711	phylum	Chordata
C26T3:1:1109:4869:14008	Sander vitreus	167	species	97	4		Sander vitreus	283036	283036	species	Sander vitreus	283033	genus	Sander	8165	family	Percidae	8111	order	Perciformes	186623	class	Actinopteri	7711	phylum	Chordata
C26T3:1:2102:11664:13918	Sander vitreus	167	species	97	2		Sander vitreus	283036	283036	species	Sander vitreus	283033	genus	Sander	8165	family	Percidae	8111	order	Perciformes	186623	class	Actinopteri	7711	phylum	Chordata
C26T3:1:2103:21582:2233	Sander vitreus	167	species	97	2		Sander vitreus	283036	283036	species	Sander vitreus	283033	genus	Sander	8165	family	Percidae	8111	order	Perciformes	186623	class	Actinopteri	7711	phylum	Chordata
C26T3:1:1103:19639:18202	Sperata seenghala	191	species	97	2		Sperata seenghala	209114	209114	species	Sperata seenghala	402708	genus	Sperata	31013	family	Bagridae	7995	order	Siluriformes	186623	class	Actinopteri	7711	phylum	Chordata
C26T3:1:1109:27475:17606	Sphyrapicus varius	183	species	99	2		Sphyrapicus varius	56079	56079	species	Sphyrapicus varius	56078	genus	Sphyrapicus	9220	family	Picidae	9219	order	Piciformes	8782	class	Aves	7711	phylum	Chordata
C26T3:1:1107:16359:16363	Squalidus gracilis	195	species	97	3		Squalidus gracilis	180935	180935	species	Squalidus gracilis	180934	genus	Squalidus	7953	family	Cyprinidae	7952	order	Cypriniformes	186623	class	Actinopteri	7711	phylum	Chordata
C26T3:1:2111:21157:19996	Squalidus gracilis	180	species	99	2		Squalidus gracilis	180935	180935	species	Squalidus gracilis	180934	genus	Squalidus	7953	family	Cyprinidae	7952	order	Cypriniformes	186623	class	Actinopteri	7711	phylum	Chordata
C26T3:1:2119:20125:8407	Squalidus gracilis	171	species	98	2		Squalidus gracilis	180935	180935	species	Squalidus gracilis	180934	genus	Squalidus	7953	family	Cyprinidae	7952	order	Cypriniformes	186623	class	Actinopteri	7711	phylum	Chordata
C26T3:1:1107:9636:19552	Squalidus gracilis	169	species	97	3		Squalidus gracilis	180935	180935	species	Squalidus gracilis	180934	genus	Squalidus	7953	family	Cyprinidae	7952	order	Cypriniformes	186623	class	Actinopteri	7711	phylum	Chordata
C26T3:1:2102:4067:12735	Squalidus gracilis	169	species	97	4		Squalidus gracilis	180935	180935	species	Squalidus gracilis	180934	genus	Squalidus	7953	family	Cyprinidae	7952	order	Cypriniformes	186623	class	Actinopteri	7711	phylum	Chordata
C26T3:1:1113:29020:15305	Squalidus gracilis	165	species	97	5		Squalidus gracilis	180935	180935	species	Squalidus gracilis	180934	genus	Squalidus	7953	family	Cyprinidae	7952	order	Cypriniformes	186623	class	Actinopteri	7711	phylum	Chordata
C26T3:1:1116:7626:9680	Squalidus gracilis	165	species	97	4		Squalidus gracilis	180935	180935	species	Squalidus gracilis	180934	genus	Squalidus	7953	family	Cyprinidae	7952	order	Cypriniformes	186623	class	Actinopteri	7711	phylum	Chordata
C26T3:1:1102:12590:23738	Sus scrofa	213	species	99	2		Sus scrofa	9823	9823	species	Sus scrofa	9822	genus	Sus	9821	family	Suidae	91561	order	Artiodactyla	40674	class	Mammalia	7711	phylum	Chordata
C26T3:1:1111:27016:20913	Sus scrofa	211	species	99	3		Sus scrofa	9823	9823	species	Sus scrofa	9822	genus	Sus	9821	family	Suidae	91561	order	Artiodactyla	40674	class	Mammalia	7711	phylum	Chordata
C26T3:1:1101:10800:1381	Sus scrofa	209	species	99	38		Sus scrofa	9823	9823	species	Sus scrofa	9822	genus	Sus	9821	family	Suidae	91561	order	Artiodactyla	40674	class	Mammalia	7711	phylum	Chordata
C26T3:1:1101:19686:1407	Sus scrofa	209	species	99	71		Sus scrofa	9823	9823	species	Sus scrofa	9822	genus	Sus	9821	family	Suidae	91561	order	Artiodactyla	40674	class	Mammalia	7711	phylum	Chordata
C26T3:1:2101:25126:12625	Sus scrofa	209	species	100	2		Sus scrofa	9823	9823	species	Sus scrofa	9822	genus	Sus	9821	family	Suidae	91561	order	Artiodactyla	40674	class	Mammalia	7711	phylum	Chordata
C26T3:1:2101:8215:1523	Sus scrofa	209	species	99	3		Sus scrofa	9823	9823	species	Sus scrofa	9822	genus	Sus	9821	family	Suidae	91561	order	Artiodactyla	40674	class	Mammalia	7711	phylum	Chordata
C26T3:1:1115:13192:14395	Sus scrofa	207	species	100	8		Sus scrofa	9823	9823	species	Sus scrofa	9822	genus	Sus	9821	family	Suidae	91561	order	Artiodactyla	40674	class	Mammalia	7711	phylum	Chordata
C26T3:1:1111:5124:11486	Sus scrofa	206	species	98	3		Sus scrofa	9823	9823	species	Sus scrofa	9822	genus	Sus	9821	family	Suidae	91561	order	Artiodactyla	40674	class	Mammalia	7711	phylum	Chordata
C26T3:1:1112:21792:19844	Sus scrofa	206	species	97.08	2		Sus scrofa	9823	9823	species	Sus scrofa	9822	genus	Sus	9821	family	Suidae	91561	order	Artiodactyla	40674	class	Mammalia	7711	phylum	Chordata
C26T3:1:1103:11223:20444	Sus scrofa	204	species	98	20		Sus scrofa	9823	9823	species	Sus scrofa	9822	genus	Sus	9821	family	Suidae	91561	order	Artiodactyla	40674	class	Mammalia	7711	phylum	Chordata
C26T3:1:1116:10157:14547	Sus scrofa	204	species	98	2		Sus scrofa	9823	9823	species	Sus scrofa	9822	genus	Sus	9821	family	Suidae	91561	order	Artiodactyla	40674	class	Mammalia	7711	phylum	Chordata
C26T3:1:1108:10996:17722	Sus scrofa	200	species	100	2		Sus scrofa	9823	9823	species	Sus scrofa	9822	genus	Sus	9821	family	Suidae	91561	order	Artiodactyla	40674	class	Mammalia	7711	phylum	Chordata
C26T3:1:1103:4826:12670	Sus scrofa	193	species	98.92	2		Sus scrofa	9823	9823	species	Sus scrofa	9822	genus	Sus	9821	family	Suidae	91561	order	Artiodactyla	40674	class	Mammalia	7711	phylum	Chordata
C26T3:1:1101:15037:11610	Sus scrofa	191	species	100	96		Sus scrofa	9823	9823	species	Sus scrofa	9822	genus	Sus	9821	family	Suidae	91561	order	Artiodactyla	40674	class	Mammalia	7711	phylum	Chordata
C26T3:1:1106:24000:7639	Sus scrofa	187	species	98.08	2		Sus scrofa	9823	9823	species	Sus scrofa	9822	genus	Sus	9821	family	Suidae	91561	order	Artiodactyla	40674	class	Mammalia	7711	phylum	Chordata
C26T3:1:1110:5067:20734	Sus scrofa	187	species	100	6		Sus scrofa	9823	9823	species	Sus scrofa	9822	genus	Sus	9821	family	Suidae	91561	order	Artiodactyla	40674	class	Mammalia	7711	phylum	Chordata
C26T3:1:1113:26922:21103	Sus scrofa	187	species	100	3		Sus scrofa	9823	9823	species	Sus scrofa	9822	genus	Sus	9821	family	Suidae	91561	order	Artiodactyla	40674	class	Mammalia	7711	phylum	Chordata
C26T3:1:2102:7935:19386	Sus scrofa	187	species	99.92	2		Sus scrofa	9823	9823	species	Sus scrofa	9822	genus	Sus	9821	family	Suidae	91561	order	Artiodactyla	40674	class	Mammalia	7711	phylum	Chordata
C26T3:1:2108:22871:13944	Sus scrofa	183	species	99	2		Sus scrofa	9823	9823	species	Sus scrofa	9822	genus	Sus	9821	family	Suidae	91561	order	Artiodactyla	40674	class	Mammalia	7711	phylum	Chordata
C26T3:1:1101:10297:15820	Sus scrofa	178	species	98.08	208		Sus scrofa	9823	9823	species	Sus scrofa	9822	genus	Sus	9821	family	Suidae	91561	order	Artiodactyla	40674	class	Mammalia	7711	phylum	Chordata
C26T3:1:1103:10778:11006	Sus scrofa	178	species	99	68		Sus scrofa	9823	9823	species	Sus scrofa	9822	genus	Sus	9821	family	Suidae	91561	order	Artiodactyla	40674	class	Mammalia	7711	phylum	Chordata
C26T3:1:1104:12101:2252	Sus scrofa	178	species	99	2		Sus scrofa	9823	9823	species	Sus scrofa	9822	genus	Sus	9821	family	Suidae	91561	order	Artiodactyla	40674	class	Mammalia	7711	phylum	Chordata
C26T3:1:1113:27684:17620	Sus scrofa	178	species	99	33		Sus scrofa	9823	9823	species	Sus scrofa	9822	genus	Sus	9821	family	Suidae	91561	order	Artiodactyla	40674	class	Mammalia	7711	phylum	Chordata
C26T3:1:1102:23528:12313	Sus scrofa	172	species	98	13		Sus scrofa	9823	9823	species	Sus scrofa	9822	genus	Sus	9821	family	Suidae	91561	order	Artiodactyla	40674	class	Mammalia	7711	phylum	Chordata
C26T3:1:1104:22471:3064	Sus scrofa	172	species	98	3		Sus scrofa	9823	9823	species	Sus scrofa	9822	genus	Sus	9821	family	Suidae	91561	order	Artiodactyla	40674	class	Mammalia	7711	phylum	Chordata
C26T3:1:1107:15098:1340	Sus scrofa	171	species	99.84	17		Sus scrofa	9823	9823	species	Sus scrofa	9822	genus	Sus	9821	family	Suidae	91561	order	Artiodactyla	40674	class	Mammalia	7711	phylum	Chordata
C26T3:1:1103:27959:7353	Sus scrofa	169	species	97.08	2		Sus scrofa	9823	9823	species	Sus scrofa	9822	genus	Sus	9821	family	Suidae	91561	order	Artiodactyla	40674	class	Mammalia	7711	phylum	Chordata
C26T3:1:1103:2831:14662	Sus scrofa	169	species	97.08	14		Sus scrofa	9823	9823	species	Sus scrofa	9822	genus	Sus	9821	family	Suidae	91561	order	Artiodactyla	40674	class	Mammalia	7711	phylum	Chordata
C26T3:1:1103:12095:10195	Sus scrofa	167	species	98.84	5		Sus scrofa	9823	9823	species	Sus scrofa	9822	genus	Sus	9821	family	Suidae	91561	order	Artiodactyla	40674	class	Mammalia	7711	phylum	Chordata
C26T3:1:1103:9237:14191	Sus scrofa	167	species	98.84	4		Sus scrofa	9823	9823	species	Sus scrofa	9822	genus	Sus	9821	family	Suidae	91561	order	Artiodactyla	40674	class	Mammalia	7711	phylum	Chordata
C26T3:1:1115:4120:9123	Sus scrofa	167	species	97	3		Sus scrofa	9823	9823	species	Sus scrofa	9822	genus	Sus	9821	family	Suidae	91561	order	Artiodactyla	40674	class	Mammalia	7711	phylum	Chordata
C26T3:1:1101:12877:9311	Sus scrofa	165	species	99.92	162		Sus scrofa	9823	9823	species	Sus scrofa	9822	genus	Sus	9821	family	Suidae	91561	order	Artiodactyla	40674	class	Mammalia	7711	phylum	Chordata
C26T3:1:1101:25750:20913	Tampichthys ipni	171	species	97.5	2		Tampichthys ipni	232989	232989	species	Tampichthys ipni	479125	genus	Tampichthys	7953	family	Cyprinidae	7952	order	Cypriniformes	186623	class	Actinopteri	7711	phylum	Chordata
C26T3:1:1104:8139:20358	Xyrauchen texanus	169	species	99	6		Xyrauchen texanus	154827	154827	species	Xyrauchen texanus	154826	genus	Xyrauchen	7968	family	Catostomidae	7952	order	Cypriniformes	186623	class	Actinopteri	7711	phylum	Chordata
C26T3:1:1101:18406:19230	Acanthodoras	180	genus	96	3		Acanthodoras	238642	238642	genus	Acanthodoras	31006	family	Doradidae	7995	order	Siluriformes	186623	class	Actinopteri	7711	phylum	Chordata
C26T3:1:1109:9256:14436	Acanthodoras	159	genus	97	3		Acanthodoras	238642	238642	genus	Acanthodoras	31006	family	Doradidae	7995	order	Siluriformes	186623	class	Actinopteri	7711	phylum	Chordata
C26T3:1:1112:17277:3691	Acanthodoras	159	genus	97	3		Acanthodoras	238642	238642	genus	Acanthodoras	31006	family	Doradidae	7995	order	Siluriformes	186623	class	Actinopteri	7711	phylum	Chordata
C26T3:1:1113:10112:17380	Acanthodoras	159	genus	97	2		Acanthodoras	238642	238642	genus	Acanthodoras	31006	family	Doradidae	7995	order	Siluriformes	186623	class	Actinopteri	7711	phylum	Chordata
C26T3:1:1113:26883:19059	Acanthodoras	159	genus	97	3		Acanthodoras	238642	238642	genus	Acanthodoras	31006	family	Doradidae	7995	order	Siluriformes	186623	class	Actinopteri	7711	phylum	Chordata
C26T3:1:1116:7824:2221	Acanthodoras	159	genus	97	2		Acanthodoras	238642	238642	genus	Acanthodoras	31006	family	Doradidae	7995	order	Siluriformes	186623	class	Actinopteri	7711	phylum	Chordata
C26T3:1:2104:9191:4831	Acanthodoras	159	genus	97	2		Acanthodoras	238642	238642	genus	Acanthodoras	31006	family	Doradidae	7995	order	Siluriformes	186623	class	Actinopteri	7711	phylum	Chordata
C26T3:1:1106:12863:12821	Acanthodoras	156	genus	97	2		Acanthodoras	238642	238642	genus	Acanthodoras	31006	family	Doradidae	7995	order	Siluriformes	186623	class	Actinopteri	7711	phylum	Chordata
C26T3:1:1101:12348:6157	Acanthodoras	154	genus	96	4		Acanthodoras	238642	238642	genus	Acanthodoras	31006	family	Doradidae	7995	order	Siluriformes	186623	class	Actinopteri	7711	phylum	Chordata
C26T3:1:2103:11394:9885	Acanthodoras	154	genus	96	2		Acanthodoras	238642	238642	genus	Acanthodoras	31006	family	Doradidae	7995	order	Siluriformes	186623	class	Actinopteri	7711	phylum	Chordata
C26T3:1:1106:16395:9312	Acipenser	189	genus	96	3		Acipenser	7901	7901	genus	Acipenser	7900	family	Acipenseridae	7899	order	Acipenseriformes	186623	class	Actinopteri	7711	phylum	Chordata
C26T3:1:1114:16860:4946	Acipenser	178	genus	99	2		Acipenser	7901	7901	genus	Acipenser	7900	family	Acipenseridae	7899	order	Acipenseriformes	186623	class	Actinopteri	7711	phylum	Chordata
C26T3:1:1110:23872:10993	Acipenser	171	genus	100	2		Acipenser	7901	7901	genus	Acipenser	7900	family	Acipenseridae	7899	order	Acipenseriformes	186623	class	Actinopteri	7711	phylum	Chordata
C26T3:1:1106:20628:17832	Acipenser	169	genus	99	2		Acipenser	7901	7901	genus	Acipenser	7900	family	Acipenseridae	7899	order	Acipenseriformes	186623	class	Actinopteri	7711	phylum	Chordata
C26T3:1:1101:18525:14639	Acipenser	163	genus	100	14		Acipenser	7901	7901	genus	Acipenser	7900	family	Acipenseridae	7899	order	Acipenseriformes	186623	class	Actinopteri	7711	phylum	Chordata
C26T3:1:1104:16724:16320	Acipenser	163	genus	100	8		Acipenser	7901	7901	genus	Acipenser	7900	family	Acipenseridae	7899	order	Acipenseriformes	186623	class	Actinopteri	7711	phylum	Chordata
C26T3:1:1112:6486:20668	Acipenser	163	genus	100	2		Acipenser	7901	7901	genus	Acipenser	7900	family	Acipenseridae	7899	order	Acipenseriformes	186623	class	Actinopteri	7711	phylum	Chordata
C26T3:1:1117:12049:1361	Acipenser	161	genus	100	73		Acipenser	7901	7901	genus	Acipenser	7900	family	Acipenseridae	7899	order	Acipenseriformes	186623	class	Actinopteri	7711	phylum	Chordata
C26T3:1:1101:4028:10603	Acipenser	158	genus	99	6		Acipenser	7901	7901	genus	Acipenser	7900	family	Acipenseridae	7899	order	Acipenseriformes	186623	class	Actinopteri	7711	phylum	Chordata
C26T3:1:1102:19932:6395	Acipenser	158	genus	99	26		Acipenser	7901	7901	genus	Acipenser	7900	family	Acipenseridae	7899	order	Acipenseriformes	186623	class	Actinopteri	7711	phylum	Chordata
C26T3:1:1105:21036:22689	Acipenser	158	genus	100	5		Acipenser	7901	7901	genus	Acipenser	7900	family	Acipenseridae	7899	order	Acipenseriformes	186623	class	Actinopteri	7711	phylum	Chordata
C26T3:1:1106:20410:13241	Acipenser	158	genus	99	18		Acipenser	7901	7901	genus	Acipenser	7900	family	Acipenseridae	7899	order	Acipenseriformes	186623	class	Actinopteri	7711	phylum	Chordata
C26T3:1:1112:7301:15457	Acipenser	158	genus	99	15		Acipenser	7901	7901	genus	Acipenser	7900	family	Acipenseridae	7899	order	Acipenseriformes	186623	class	Actinopteri	7711	phylum	Chordata
C26T3:1:2106:12204:6838	Acipenser	158	genus	99	4		Acipenser	7901	7901	genus	Acipenser	7900	family	Acipenseridae	7899	order	Acipenseriformes	186623	class	Actinopteri	7711	phylum	Chordata
C26T3:1:1113:26166:18190	Acipenser	154	genus	97	5		Acipenser	7901	7901	genus	Acipenser	7900	family	Acipenseridae	7899	order	Acipenseriformes	186623	class	Actinopteri	7711	phylum	Chordata
C26T3:1:1102:24256:20765	Acipenser	152	genus	98	11		Acipenser	7901	7901	genus	Acipenser	7900	family	Acipenseridae	7899	order	Acipenseriformes	186623	class	Actinopteri	7711	phylum	Chordata
C26T3:1:1105:8174:18499	Acipenser	152	genus	98	9		Acipenser	7901	7901	genus	Acipenser	7900	family	Acipenseridae	7899	order	Acipenseriformes	186623	class	Actinopteri	7711	phylum	Chordata
C26T3:1:1108:26367:14380	Acipenser	152	genus	95	3		Acipenser	7901	7901	genus	Acipenser	7900	family	Acipenseridae	7899	order	Acipenseriformes	186623	class	Actinopteri	7711	phylum	Chordata
C26T3:1:1110:7581:11961	Acipenser	152	genus	95	2		Acipenser	7901	7901	genus	Acipenser	7900	family	Acipenseridae	7899	order	Acipenseriformes	186623	class	Actinopteri	7711	phylum	Chordata
C26T3:1:1112:2847:15462	Acipenser	152	genus	95	6		Acipenser	7901	7901	genus	Acipenser	7900	family	Acipenseridae	7899	order	Acipenseriformes	186623	class	Actinopteri	7711	phylum	Chordata
C26T3:1:1117:18009:21722	Acipenser	152	genus	95	3		Acipenser	7901	7901	genus	Acipenser	7900	family	Acipenseridae	7899	order	Acipenseriformes	186623	class	Actinopteri	7711	phylum	Chordata
C26T3:1:1117:6326:18713	Acipenser	152	genus	95	3		Acipenser	7901	7901	genus	Acipenser	7900	family	Acipenseridae	7899	order	Acipenseriformes	186623	class	Actinopteri	7711	phylum	Chordata
C26T3:1:2102:11513:18602	Acipenser	152	genus	95	2		Acipenser	7901	7901	genus	Acipenser	7900	family	Acipenseridae	7899	order	Acipenseriformes	186623	class	Actinopteri	7711	phylum	Chordata
C26T3:1:1103:20006:13696	Aix	176	genus	97.3333	12		Aix	8831	8831	genus	Aix	8830	family	Anatidae	8826	order	Anseriformes	8782	class	Aves	7711	phylum	Chordata
C26T3:1:1103:17179:13205	Aix	172	genus	97.3333	44		Aix	8831	8831	genus	Aix	8830	family	Anatidae	8826	order	Anseriformes	8782	class	Aves	7711	phylum	Chordata
C26T3:1:1102:17578:23585	Aix	158	genus	97.3333	7		Aix	8831	8831	genus	Aix	8830	family	Anatidae	8826	order	Anseriformes	8782	class	Aves	7711	phylum	Chordata
C26T3:1:1103:24781:8360	Aix	156	genus	97.3333	4		Aix	8831	8831	genus	Aix	8830	family	Anatidae	8826	order	Anseriformes	8782	class	Aves	7711	phylum	Chordata
C26T3:1:2101:11049:15693	Alburnus	161	genus	96	2		Alburnus	54555	54555	genus	Alburnus	7953	family	Cyprinidae	7952	order	Cypriniformes	186623	class	Actinopteri	7711	phylum	Chordata
C26T3:1:1102:3265:15716	Algansea	156	genus	95	4		Algansea	364077	364077	genus	Algansea	7953	family	Cyprinidae	7952	order	Cypriniformes	186623	class	Actinopteri	7711	phylum	Chordata
C26T3:1:1102:22589:23284	Ambloplites	206	genus	98	5		Ambloplites	109272	109272	genus	Ambloplites	8180	family	Centrarchidae	1489940	order	Centrarchiformes	186623	class	Actinopteri	7711	phylum	Chordata
C26T3:1:1113:9172:6407	Ambloplites	206	genus	98	3		Ambloplites	109272	109272	genus	Ambloplites	8180	family	Centrarchidae	1489940	order	Centrarchiformes	186623	class	Actinopteri	7711	phylum	Chordata
C26T3:1:1114:4505:9221	Ambloplites	206	genus	97.6667	2		Ambloplites	109272	109272	genus	Ambloplites	8180	family	Centrarchidae	1489940	order	Centrarchiformes	186623	class	Actinopteri	7711	phylum	Chordata
C26T3:1:1115:6497:11542	Ambloplites	206	genus	98	3		Ambloplites	109272	109272	genus	Ambloplites	8180	family	Centrarchidae	1489940	order	Centrarchiformes	186623	class	Actinopteri	7711	phylum	Chordata
C26T3:1:2106:8319:21455	Ambloplites	206	genus	98	2		Ambloplites	109272	109272	genus	Ambloplites	8180	family	Centrarchidae	1489940	order	Centrarchiformes	186623	class	Actinopteri	7711	phylum	Chordata
C26T3:1:2109:28508:9680	Ambloplites	206	genus	98	2		Ambloplites	109272	109272	genus	Ambloplites	8180	family	Centrarchidae	1489940	order	Centrarchiformes	186623	class	Actinopteri	7711	phylum	Chordata
C26T3:1:1101:4399:10674	Ambloplites	202	genus	99	15		Ambloplites	109272	109272	genus	Ambloplites	8180	family	Centrarchidae	1489940	order	Centrarchiformes	186623	class	Actinopteri	7711	phylum	Chordata
C26T3:1:1103:27952:9450	Ambloplites	200	genus	97	8		Ambloplites	109272	109272	genus	Ambloplites	8180	family	Centrarchidae	1489940	order	Centrarchiformes	186623	class	Actinopteri	7711	phylum	Chordata
C26T3:1:1103:9044:5629	Ambloplites	200	genus	97.75	3		Ambloplites	109272	109272	genus	Ambloplites	8180	family	Centrarchidae	1489940	order	Centrarchiformes	186623	class	Actinopteri	7711	phylum	Chordata
C26T3:1:1106:24022:3501	Ambloplites	200	genus	97.5	2		Ambloplites	109272	109272	genus	Ambloplites	8180	family	Centrarchidae	1489940	order	Centrarchiformes	186623	class	Actinopteri	7711	phylum	Chordata
C26T3:1:1118:21276:8372	Ambloplites	200	genus	97.25	3		Ambloplites	109272	109272	genus	Ambloplites	8180	family	Centrarchidae	1489940	order	Centrarchiformes	186623	class	Actinopteri	7711	phylum	Chordata
C26T3:1:2106:8727:23887	Ambloplites	200	genus	97.5	2		Ambloplites	109272	109272	genus	Ambloplites	8180	family	Centrarchidae	1489940	order	Centrarchiformes	186623	class	Actinopteri	7711	phylum	Chordata
C26T3:1:1101:24329:17356	Ambloplites	196	genus	98	19		Ambloplites	109272	109272	genus	Ambloplites	8180	family	Centrarchidae	1489940	order	Centrarchiformes	186623	class	Actinopteri	7711	phylum	Chordata
C26T3:1:1101:6380:15169	Ambloplites	196	genus	98.75	4		Ambloplites	109272	109272	genus	Ambloplites	8180	family	Centrarchidae	1489940	order	Centrarchiformes	186623	class	Actinopteri	7711	phylum	Chordata
C26T3:1:1102:18048:18831	Ambloplites	196	genus	98	26		Ambloplites	109272	109272	genus	Ambloplites	8180	family	Centrarchidae	1489940	order	Centrarchiformes	186623	class	Actinopteri	7711	phylum	Chordata
C26T3:1:1103:7895:13591	Ambloplites	196	genus	98	9		Ambloplites	109272	109272	genus	Ambloplites	8180	family	Centrarchidae	1489940	order	Centrarchiformes	186623	class	Actinopteri	7711	phylum	Chordata
C26T3:1:1106:10458:4434	Ambloplites	196	genus	96.75	6		Ambloplites	109272	109272	genus	Ambloplites	8180	family	Centrarchidae	1489940	order	Centrarchiformes	186623	class	Actinopteri	7711	phylum	Chordata
C26T3:1:1112:10025:7576	Ambloplites	196	genus	98	2		Ambloplites	109272	109272	genus	Ambloplites	8180	family	Centrarchidae	1489940	order	Centrarchiformes	186623	class	Actinopteri	7711	phylum	Chordata
C26T3:1:1107:23401:20522	Ambloplites	191	genus	95.75	7		Ambloplites	109272	109272	genus	Ambloplites	8180	family	Centrarchidae	1489940	order	Centrarchiformes	186623	class	Actinopteri	7711	phylum	Chordata
C26T3:1:1107:4920:9759	Ambloplites	191	genus	95.75	2		Ambloplites	109272	109272	genus	Ambloplites	8180	family	Centrarchidae	1489940	order	Centrarchiformes	186623	class	Actinopteri	7711	phylum	Chordata
C26T3:1:2119:26669:4540	Ambloplites	191	genus	95.75	4		Ambloplites	109272	109272	genus	Ambloplites	8180	family	Centrarchidae	1489940	order	Centrarchiformes	186623	class	Actinopteri	7711	phylum	Chordata
C26T3:1:1109:19285:22565	Ambloplites	189	genus	95.75	3		Ambloplites	109272	109272	genus	Ambloplites	8180	family	Centrarchidae	1489940	order	Centrarchiformes	186623	class	Actinopteri	7711	phylum	Chordata
C26T3:1:2105:26997:6144	Ambloplites	189	genus	96	3		Ambloplites	109272	109272	genus	Ambloplites	8180	family	Centrarchidae	1489940	order	Centrarchiformes	186623	class	Actinopteri	7711	phylum	Chordata
C26T3:1:1107:2339:16905	Ambloplites	187	genus	98.75	2		Ambloplites	109272	109272	genus	Ambloplites	8180	family	Centrarchidae	1489940	order	Centrarchiformes	186623	class	Actinopteri	7711	phylum	Chordata
C26T3:1:1107:2946:11649	Ambloplites	185	genus	96.25	4		Ambloplites	109272	109272	genus	Ambloplites	8180	family	Centrarchidae	1489940	order	Centrarchiformes	186623	class	Actinopteri	7711	phylum	Chordata
C26T3:1:2102:20914:6972	Ambloplites	185	genus	96.75	2		Ambloplites	109272	109272	genus	Ambloplites	8180	family	Centrarchidae	1489940	order	Centrarchiformes	186623	class	Actinopteri	7711	phylum	Chordata
C26T3:1:1104:12391:1303	Ambloplites	183	genus	98	2		Ambloplites	109272	109272	genus	Ambloplites	8180	family	Centrarchidae	1489940	order	Centrarchiformes	186623	class	Actinopteri	7711	phylum	Chordata
C26T3:1:1113:16133:20943	Ambloplites	183	genus	97.75	3		Ambloplites	109272	109272	genus	Ambloplites	8180	family	Centrarchidae	1489940	order	Centrarchiformes	186623	class	Actinopteri	7711	phylum	Chordata
C26T3:1:1118:21207:8650	Ambloplites	183	genus	97.75	4		Ambloplites	109272	109272	genus	Ambloplites	8180	family	Centrarchidae	1489940	order	Centrarchiformes	186623	class	Actinopteri	7711	phylum	Chordata
C26T3:1:1103:15265:21270	Ambloplites	180	genus	95.75	3		Ambloplites	109272	109272	genus	Ambloplites	8180	family	Centrarchidae	1489940	order	Centrarchiformes	186623	class	Actinopteri	7711	phylum	Chordata
C26T3:1:1104:24313:12070	Ambloplites	180	genus	95.6667	6		Ambloplites	109272	109272	genus	Ambloplites	8180	family	Centrarchidae	1489940	order	Centrarchiformes	186623	class	Actinopteri	7711	phylum	Chordata
C26T3:1:1107:16274:9439	Ambloplites	180	genus	96	5		Ambloplites	109272	109272	genus	Ambloplites	8180	family	Centrarchidae	1489940	order	Centrarchiformes	186623	class	Actinopteri	7711	phylum	Chordata
C26T3:1:2103:12905:20254	Ambloplites	180	genus	95.75	4		Ambloplites	109272	109272	genus	Ambloplites	8180	family	Centrarchidae	1489940	order	Centrarchiformes	186623	class	Actinopteri	7711	phylum	Chordata
C26T3:1:2107:2154:15988	Ambloplites	180	genus	95.6667	2		Ambloplites	109272	109272	genus	Ambloplites	8180	family	Centrarchidae	1489940	order	Centrarchiformes	186623	class	Actinopteri	7711	phylum	Chordata
C26T3:1:2116:26732:4797	Ambloplites	180	genus	95	2		Ambloplites	109272	109272	genus	Ambloplites	8180	family	Centrarchidae	1489940	order	Centrarchiformes	186623	class	Actinopteri	7711	phylum	Chordata
C26T3:1:1101:10290:6832	Ambloplites	176	genus	99.75	1257		Ambloplites	109272	109272	genus	Ambloplites	8180	family	Centrarchidae	1489940	order	Centrarchiformes	186623	class	Actinopteri	7711	phylum	Chordata
C26T3:1:1114:4057:13765	Ambloplites	176	genus	98.75	28		Ambloplites	109272	109272	genus	Ambloplites	8180	family	Centrarchidae	1489940	order	Centrarchiformes	186623	class	Actinopteri	7711	phylum	Chordata
C26T3:1:2102:23893:4983	Ambloplites	176	genus	97.75	2		Ambloplites	109272	109272	genus	Ambloplites	8180	family	Centrarchidae	1489940	order	Centrarchiformes	186623	class	Actinopteri	7711	phylum	Chordata
C26T3:1:1101:21295:14614	Ambloplites	174	genus	97.75	100		Ambloplites	109272	109272	genus	Ambloplites	8180	family	Centrarchidae	1489940	order	Centrarchiformes	186623	class	Actinopteri	7711	phylum	Chordata
C26T3:1:1101:21865:22551	Ambloplites	174	genus	97.75	139		Ambloplites	109272	109272	genus	Ambloplites	8180	family	Centrarchidae	1489940	order	Centrarchiformes	186623	class	Actinopteri	7711	phylum	Chordata
C26T3:1:1101:22639:11918	Ambloplites	174	genus	97.75	16		Ambloplites	109272	109272	genus	Ambloplites	8180	family	Centrarchidae	1489940	order	Centrarchiformes	186623	class	Actinopteri	7711	phylum	Chordata
C26T3:1:1101:3420:16165	Ambloplites	174	genus	97.75	89		Ambloplites	109272	109272	genus	Ambloplites	8180	family	Centrarchidae	1489940	order	Centrarchiformes	186623	class	Actinopteri	7711	phylum	Chordata
C26T3:1:1102:16589:16781	Ambloplites	174	genus	96	3		Ambloplites	109272	109272	genus	Ambloplites	8180	family	Centrarchidae	1489940	order	Centrarchiformes	186623	class	Actinopteri	7711	phylum	Chordata
C26T3:1:1102:29189:11424	Ambloplites	174	genus	98.2	19		Ambloplites	109272	109272	genus	Ambloplites	8180	family	Centrarchidae	1489940	order	Centrarchiformes	186623	class	Actinopteri	7711	phylum	Chordata
C26T3:1:1102:3668:18119	Ambloplites	174	genus	97.75	33		Ambloplites	109272	109272	genus	Ambloplites	8180	family	Centrarchidae	1489940	order	Centrarchiformes	186623	class	Actinopteri	7711	phylum	Chordata
C26T3:1:1102:4342:19548	Ambloplites	174	genus	96	3		Ambloplites	109272	109272	genus	Ambloplites	8180	family	Centrarchidae	1489940	order	Centrarchiformes	186623	class	Actinopteri	7711	phylum	Chordata
C26T3:1:1102:7115:4717	Ambloplites	174	genus	97.75	7		Ambloplites	109272	109272	genus	Ambloplites	8180	family	Centrarchidae	1489940	order	Centrarchiformes	186623	class	Actinopteri	7711	phylum	Chordata
C26T3:1:1103:19504:18494	Ambloplites	174	genus	97.75	4		Ambloplites	109272	109272	genus	Ambloplites	8180	family	Centrarchidae	1489940	order	Centrarchiformes	186623	class	Actinopteri	7711	phylum	Chordata
C26T3:1:1107:4658:9002	Ambloplites	174	genus	97.75	19		Ambloplites	109272	109272	genus	Ambloplites	8180	family	Centrarchidae	1489940	order	Centrarchiformes	186623	class	Actinopteri	7711	phylum	Chordata
C26T3:1:1110:6037:5195	Ambloplites	174	genus	97.75	7		Ambloplites	109272	109272	genus	Ambloplites	8180	family	Centrarchidae	1489940	order	Centrarchiformes	186623	class	Actinopteri	7711	phylum	Chordata
C26T3:1:1111:10942:6559	Ambloplites	174	genus	97.75	12		Ambloplites	109272	109272	genus	Ambloplites	8180	family	Centrarchidae	1489940	order	Centrarchiformes	186623	class	Actinopteri	7711	phylum	Chordata
C26T3:1:1111:7468:6080	Ambloplites	174	genus	97.75	2		Ambloplites	109272	109272	genus	Ambloplites	8180	family	Centrarchidae	1489940	order	Centrarchiformes	186623	class	Actinopteri	7711	phylum	Chordata
C26T3:1:1119:14671:2898	Ambloplites	174	genus	97.75	6		Ambloplites	109272	109272	genus	Ambloplites	8180	family	Centrarchidae	1489940	order	Centrarchiformes	186623	class	Actinopteri	7711	phylum	Chordata
C26T3:1:2107:7901:3771	Ambloplites	174	genus	97.75	2		Ambloplites	109272	109272	genus	Ambloplites	8180	family	Centrarchidae	1489940	order	Centrarchiformes	186623	class	Actinopteri	7711	phylum	Chordata
C26T3:1:1101:13205:16856	Ambloplites	172	genus	99.75	106		Ambloplites	109272	109272	genus	Ambloplites	8180	family	Centrarchidae	1489940	order	Centrarchiformes	186623	class	Actinopteri	7711	phylum	Chordata
C26T3:1:1101:15989:1792	Ambloplites	172	genus	99.75	66		Ambloplites	109272	109272	genus	Ambloplites	8180	family	Centrarchidae	1489940	order	Centrarchiformes	186623	class	Actinopteri	7711	phylum	Chordata
C26T3:1:1103:8813:9501	Ambloplites	172	genus	96	3		Ambloplites	109272	109272	genus	Ambloplites	8180	family	Centrarchidae	1489940	order	Centrarchiformes	186623	class	Actinopteri	7711	phylum	Chordata
C26T3:1:1104:3876:18286	Ambloplites	172	genus	97.75	19		Ambloplites	109272	109272	genus	Ambloplites	8180	family	Centrarchidae	1489940	order	Centrarchiformes	186623	class	Actinopteri	7711	phylum	Chordata
C26T3:1:1105:29118:13667	Ambloplites	172	genus	98.75	2		Ambloplites	109272	109272	genus	Ambloplites	8180	family	Centrarchidae	1489940	order	Centrarchiformes	186623	class	Actinopteri	7711	phylum	Chordata
C26T3:1:1106:18247:21186	Ambloplites	172	genus	95.75	4		Ambloplites	109272	109272	genus	Ambloplites	8180	family	Centrarchidae	1489940	order	Centrarchiformes	186623	class	Actinopteri	7711	phylum	Chordata
C26T3:1:1107:23913:18959	Ambloplites	172	genus	95.75	9		Ambloplites	109272	109272	genus	Ambloplites	8180	family	Centrarchidae	1489940	order	Centrarchiformes	186623	class	Actinopteri	7711	phylum	Chordata
C26T3:1:1109:13529:17046	Ambloplites	172	genus	97.75	46		Ambloplites	109272	109272	genus	Ambloplites	8180	family	Centrarchidae	1489940	order	Centrarchiformes	186623	class	Actinopteri	7711	phylum	Chordata
C26T3:1:2104:23037:23307	Ambloplites	172	genus	98.75	4		Ambloplites	109272	109272	genus	Ambloplites	8180	family	Centrarchidae	1489940	order	Centrarchiformes	186623	class	Actinopteri	7711	phylum	Chordata
C26T3:1:1102:8821:10945	Ambloplites	165	genus	95.75	400		Ambloplites	109272	109272	genus	Ambloplites	8180	family	Centrarchidae	1489940	order	Centrarchiformes	186623	class	Actinopteri	7711	phylum	Chordata
C26T3:1:1101:13602:15830	Ambloplites	163	genus	95.75	308		Ambloplites	109272	109272	genus	Ambloplites	8180	family	Centrarchidae	1489940	order	Centrarchiformes	186623	class	Actinopteri	7711	phylum	Chordata
C26T3:1:1102:11161:21181	Ambloplites	163	genus	99.75	19		Ambloplites	109272	109272	genus	Ambloplites	8180	family	Centrarchidae	1489940	order	Centrarchiformes	186623	class	Actinopteri	7711	phylum	Chordata
C26T3:1:1102:2633:17020	Ambloplites	163	genus	95.75	6		Ambloplites	109272	109272	genus	Ambloplites	8180	family	Centrarchidae	1489940	order	Centrarchiformes	186623	class	Actinopteri	7711	phylum	Chordata
C26T3:1:1105:15423:17369	Ambloplites	163	genus	99.75	12		Ambloplites	109272	109272	genus	Ambloplites	8180	family	Centrarchidae	1489940	order	Centrarchiformes	186623	class	Actinopteri	7711	phylum	Chordata
C26T3:1:1105:18779:14383	Ambloplites	163	genus	99.75	2		Ambloplites	109272	109272	genus	Ambloplites	8180	family	Centrarchidae	1489940	order	Centrarchiformes	186623	class	Actinopteri	7711	phylum	Chordata
C26T3:1:1110:18767:14532	Ambloplites	163	genus	95.75	2		Ambloplites	109272	109272	genus	Ambloplites	8180	family	Centrarchidae	1489940	order	Centrarchiformes	186623	class	Actinopteri	7711	phylum	Chordata
C26T3:1:1112:27748:9369	Ambloplites	163	genus	99.75	119		Ambloplites	109272	109272	genus	Ambloplites	8180	family	Centrarchidae	1489940	order	Centrarchiformes	186623	class	Actinopteri	7711	phylum	Chordata
C26T3:1:1115:19481:24305	Ambloplites	163	genus	95.75	7		Ambloplites	109272	109272	genus	Ambloplites	8180	family	Centrarchidae	1489940	order	Centrarchiformes	186623	class	Actinopteri	7711	phylum	Chordata
C26T3:1:2101:21761:5067	Ambloplites	163	genus	95.75	2		Ambloplites	109272	109272	genus	Ambloplites	8180	family	Centrarchidae	1489940	order	Centrarchiformes	186623	class	Actinopteri	7711	phylum	Chordata
C26T3:1:1102:19104:23450	Ambloplites	161	genus	97.75	3		Ambloplites	109272	109272	genus	Ambloplites	8180	family	Centrarchidae	1489940	order	Centrarchiformes	186623	class	Actinopteri	7711	phylum	Chordata
C26T3:1:1111:5216:5287	Ambloplites	161	genus	95.75	3		Ambloplites	109272	109272	genus	Ambloplites	8180	family	Centrarchidae	1489940	order	Centrarchiformes	186623	class	Actinopteri	7711	phylum	Chordata
C26T3:1:1113:18046:1110	Ambloplites	161	genus	97.75	2		Ambloplites	109272	109272	genus	Ambloplites	8180	family	Centrarchidae	1489940	order	Centrarchiformes	186623	class	Actinopteri	7711	phylum	Chordata
C26T3:1:1113:7462:17503	Ambloplites	161	genus	97.75	9		Ambloplites	109272	109272	genus	Ambloplites	8180	family	Centrarchidae	1489940	order	Centrarchiformes	186623	class	Actinopteri	7711	phylum	Chordata
C26T3:1:1115:7874:24286	Ambloplites	161	genus	97.75	2		Ambloplites	109272	109272	genus	Ambloplites	8180	family	Centrarchidae	1489940	order	Centrarchiformes	186623	class	Actinopteri	7711	phylum	Chordata
C26T3:1:1118:18335:24911	Ambloplites	161	genus	99.75	4		Ambloplites	109272	109272	genus	Ambloplites	8180	family	Centrarchidae	1489940	order	Centrarchiformes	186623	class	Actinopteri	7711	phylum	Chordata
C26T3:1:2106:8276:20805	Ambloplites	161	genus	99.75	2		Ambloplites	109272	109272	genus	Ambloplites	8180	family	Centrarchidae	1489940	order	Centrarchiformes	186623	class	Actinopteri	7711	phylum	Chordata
C26T3:1:1101:23320:20796	Ambloplites	159	genus	96.75	95		Ambloplites	109272	109272	genus	Ambloplites	8180	family	Centrarchidae	1489940	order	Centrarchiformes	186623	class	Actinopteri	7711	phylum	Chordata
C26T3:1:1101:8086:10166	Ambloplites	159	genus	98.75	74		Ambloplites	109272	109272	genus	Ambloplites	8180	family	Centrarchidae	1489940	order	Centrarchiformes	186623	class	Actinopteri	7711	phylum	Chordata
C26T3:1:1102:8431:13427	Ambloplites	159	genus	96.75	7		Ambloplites	109272	109272	genus	Ambloplites	8180	family	Centrarchidae	1489940	order	Centrarchiformes	186623	class	Actinopteri	7711	phylum	Chordata
C26T3:1:1103:12441:22481	Ambloplites	159	genus	96.75	2		Ambloplites	109272	109272	genus	Ambloplites	8180	family	Centrarchidae	1489940	order	Centrarchiformes	186623	class	Actinopteri	7711	phylum	Chordata
C26T3:1:1104:5626:12112	Ambloplites	159	genus	96.75	20		Ambloplites	109272	109272	genus	Ambloplites	8180	family	Centrarchidae	1489940	order	Centrarchiformes	186623	class	Actinopteri	7711	phylum	Chordata
C26T3:1:1104:7643:23932	Ambloplites	159	genus	96.75	6		Ambloplites	109272	109272	genus	Ambloplites	8180	family	Centrarchidae	1489940	order	Centrarchiformes	186623	class	Actinopteri	7711	phylum	Chordata
C26T3:1:1107:13307:19369	Ambloplites	159	genus	97	11		Ambloplites	109272	109272	genus	Ambloplites	8180	family	Centrarchidae	1489940	order	Centrarchiformes	186623	class	Actinopteri	7711	phylum	Chordata
C26T3:1:1107:6860:14776	Ambloplites	159	genus	96.75	4		Ambloplites	109272	109272	genus	Ambloplites	8180	family	Centrarchidae	1489940	order	Centrarchiformes	186623	class	Actinopteri	7711	phylum	Chordata
C26T3:1:1108:18192:15330	Ambloplites	159	genus	96.75	6		Ambloplites	109272	109272	genus	Ambloplites	8180	family	Centrarchidae	1489940	order	Centrarchiformes	186623	class	Actinopteri	7711	phylum	Chordata
C26T3:1:1108:26545:7461	Ambloplites	159	genus	96.75	2		Ambloplites	109272	109272	genus	Ambloplites	8180	family	Centrarchidae	1489940	order	Centrarchiformes	186623	class	Actinopteri	7711	phylum	Chordata
C26T3:1:1109:14451:15524	Ambloplites	159	genus	96.25	3		Ambloplites	109272	109272	genus	Ambloplites	8180	family	Centrarchidae	1489940	order	Centrarchiformes	186623	class	Actinopteri	7711	phylum	Chordata
C26T3:1:1110:18183:15531	Ambloplites	159	genus	96.75	2		Ambloplites	109272	109272	genus	Ambloplites	8180	family	Centrarchidae	1489940	order	Centrarchiformes	186623	class	Actinopteri	7711	phylum	Chordata
C26T3:1:1112:10661:17270	Ambloplites	159	genus	96.75	13		Ambloplites	109272	109272	genus	Ambloplites	8180	family	Centrarchidae	1489940	order	Centrarchiformes	186623	class	Actinopteri	7711	phylum	Chordata
C26T3:1:1112:28817:16512	Ambloplites	159	genus	96.75	7		Ambloplites	109272	109272	genus	Ambloplites	8180	family	Centrarchidae	1489940	order	Centrarchiformes	186623	class	Actinopteri	7711	phylum	Chordata
C26T3:1:1113:21983:23971	Ambloplites	159	genus	96.75	7		Ambloplites	109272	109272	genus	Ambloplites	8180	family	Centrarchidae	1489940	order	Centrarchiformes	186623	class	Actinopteri	7711	phylum	Chordata
C26T3:1:1113:24999:16518	Ambloplites	159	genus	96.75	8		Ambloplites	109272	109272	genus	Ambloplites	8180	family	Centrarchidae	1489940	order	Centrarchiformes	186623	class	Actinopteri	7711	phylum	Chordata
C26T3:1:1115:4673:15003	Ambloplites	159	genus	96.75	12		Ambloplites	109272	109272	genus	Ambloplites	8180	family	Centrarchidae	1489940	order	Centrarchiformes	186623	class	Actinopteri	7711	phylum	Chordata
C26T3:1:1117:14559:20336	Ambloplites	159	genus	96.75	4		Ambloplites	109272	109272	genus	Ambloplites	8180	family	Centrarchidae	1489940	order	Centrarchiformes	186623	class	Actinopteri	7711	phylum	Chordata
C26T3:1:1118:27843:7483	Ambloplites	159	genus	96.75	4		Ambloplites	109272	109272	genus	Ambloplites	8180	family	Centrarchidae	1489940	order	Centrarchiformes	186623	class	Actinopteri	7711	phylum	Chordata
C26T3:1:1119:9144:17998	Ambloplites	159	genus	96.75	3		Ambloplites	109272	109272	genus	Ambloplites	8180	family	Centrarchidae	1489940	order	Centrarchiformes	186623	class	Actinopteri	7711	phylum	Chordata
C26T3:1:2102:7970:19209	Ambloplites	159	genus	96.75	5		Ambloplites	109272	109272	genus	Ambloplites	8180	family	Centrarchidae	1489940	order	Centrarchiformes	186623	class	Actinopteri	7711	phylum	Chordata
C26T3:1:2111:15979:24705	Ambloplites	159	genus	96.75	2		Ambloplites	109272	109272	genus	Ambloplites	8180	family	Centrarchidae	1489940	order	Centrarchiformes	186623	class	Actinopteri	7711	phylum	Chordata
C26T3:1:2112:13533:18930	Ambloplites	159	genus	98.75	2		Ambloplites	109272	109272	genus	Ambloplites	8180	family	Centrarchidae	1489940	order	Centrarchiformes	186623	class	Actinopteri	7711	phylum	Chordata
C26T3:1:1101:11524:14167	Ambloplites	158	genus	98.75	157		Ambloplites	109272	109272	genus	Ambloplites	8180	family	Centrarchidae	1489940	order	Centrarchiformes	186623	class	Actinopteri	7711	phylum	Chordata
C26T3:1:1102:17098:24313	Ambloplites	158	genus	98.75	6		Ambloplites	109272	109272	genus	Ambloplites	8180	family	Centrarchidae	1489940	order	Centrarchiformes	186623	class	Actinopteri	7711	phylum	Chordata
C26T3:1:1104:23249:9676	Ambloplites	158	genus	95	2		Ambloplites	109272	109272	genus	Ambloplites	8180	family	Centrarchidae	1489940	order	Centrarchiformes	186623	class	Actinopteri	7711	phylum	Chordata
C26T3:1:1111:22576:2852	Ambloplites	158	genus	95	4		Ambloplites	109272	109272	genus	Ambloplites	8180	family	Centrarchidae	1489940	order	Centrarchiformes	186623	class	Actinopteri	7711	phylum	Chordata
C26T3:1:1116:27067:16827	Ambloplites	158	genus	98.75	3		Ambloplites	109272	109272	genus	Ambloplites	8180	family	Centrarchidae	1489940	order	Centrarchiformes	186623	class	Actinopteri	7711	phylum	Chordata
C26T3:1:1118:22336:6653	Ambloplites	158	genus	98.75	3		Ambloplites	109272	109272	genus	Ambloplites	8180	family	Centrarchidae	1489940	order	Centrarchiformes	186623	class	Actinopteri	7711	phylum	Chordata
C26T3:1:1119:13805:17165	Ambloplites	158	genus	98.75	10		Ambloplites	109272	109272	genus	Ambloplites	8180	family	Centrarchidae	1489940	order	Centrarchiformes	186623	class	Actinopteri	7711	phylum	Chordata
C26T3:1:2109:8111:20374	Ambloplites	158	genus	95.75	3		Ambloplites	109272	109272	genus	Ambloplites	8180	family	Centrarchidae	1489940	order	Centrarchiformes	186623	class	Actinopteri	7711	phylum	Chordata
C26T3:1:1101:25187:17536	Ambloplites	156	genus	98.75	23		Ambloplites	109272	109272	genus	Ambloplites	8180	family	Centrarchidae	1489940	order	Centrarchiformes	186623	class	Actinopteri	7711	phylum	Chordata
C26T3:1:1109:11268:18508	Ambloplites	156	genus	98.75	8		Ambloplites	109272	109272	genus	Ambloplites	8180	family	Centrarchidae	1489940	order	Centrarchiformes	186623	class	Actinopteri	7711	phylum	Chordata
C26T3:1:2105:24808:19526	Ambloplites	156	genus	97.75	2		Ambloplites	109272	109272	genus	Ambloplites	8180	family	Centrarchidae	1489940	order	Centrarchiformes	186623	class	Actinopteri	7711	phylum	Chordata
C26T3:1:2109:27163:15614	Ambloplites	156	genus	97.75	2		Ambloplites	109272	109272	genus	Ambloplites	8180	family	Centrarchidae	1489940	order	Centrarchiformes	186623	class	Actinopteri	7711	phylum	Chordata
C26T3:1:1101:10232:4579	Ambloplites	154	genus	95.75	663		Ambloplites	109272	109272	genus	Ambloplites	8180	family	Centrarchidae	1489940	order	Centrarchiformes	186623	class	Actinopteri	7711	phylum	Chordata
C26T3:1:1101:12371:12072	Ambloplites	154	genus	97.75	50		Ambloplites	109272	109272	genus	Ambloplites	8180	family	Centrarchidae	1489940	order	Centrarchiformes	186623	class	Actinopteri	7711	phylum	Chordata
C26T3:1:1101:8747:16990	Ambloplites	154	genus	95.75	272		Ambloplites	109272	109272	genus	Ambloplites	8180	family	Centrarchidae	1489940	order	Centrarchiformes	186623	class	Actinopteri	7711	phylum	Chordata
C26T3:1:1102:26996:13845	Ambloplites	154	genus	97.75	6		Ambloplites	109272	109272	genus	Ambloplites	8180	family	Centrarchidae	1489940	order	Centrarchiformes	186623	class	Actinopteri	7711	phylum	Chordata
C26T3:1:1106:25061:6367	Ambloplites	154	genus	97.75	2		Ambloplites	109272	109272	genus	Ambloplites	8180	family	Centrarchidae	1489940	order	Centrarchiformes	186623	class	Actinopteri	7711	phylum	Chordata
C26T3:1:1106:7528:23575	Ambloplites	154	genus	95.75	2		Ambloplites	109272	109272	genus	Ambloplites	8180	family	Centrarchidae	1489940	order	Centrarchiformes	186623	class	Actinopteri	7711	phylum	Chordata
C26T3:1:1108:15945:5990	Ambloplites	154	genus	97.75	11		Ambloplites	109272	109272	genus	Ambloplites	8180	family	Centrarchidae	1489940	order	Centrarchiformes	186623	class	Actinopteri	7711	phylum	Chordata
C26T3:1:1110:14478:14877	Ambloplites	154	genus	95.75	2		Ambloplites	109272	109272	genus	Ambloplites	8180	family	Centrarchidae	1489940	order	Centrarchiformes	186623	class	Actinopteri	7711	phylum	Chordata
C26T3:1:1110:6303:5173	Ambloplites	154	genus	95.75	2		Ambloplites	109272	109272	genus	Ambloplites	8180	family	Centrarchidae	1489940	order	Centrarchiformes	186623	class	Actinopteri	7711	phylum	Chordata
C26T3:1:1111:13227:7305	Ambloplites	154	genus	97.75	3		Ambloplites	109272	109272	genus	Ambloplites	8180	family	Centrarchidae	1489940	order	Centrarchiformes	186623	class	Actinopteri	7711	phylum	Chordata
C26T3:1:1112:11396:18764	Ambloplites	154	genus	95.75	134		Ambloplites	109272	109272	genus	Ambloplites	8180	family	Centrarchidae	1489940	order	Centrarchiformes	186623	class	Actinopteri	7711	phylum	Chordata
C26T3:1:1112:2270:16571	Ambloplites	154	genus	95.75	4		Ambloplites	109272	109272	genus	Ambloplites	8180	family	Centrarchidae	1489940	order	Centrarchiformes	186623	class	Actinopteri	7711	phylum	Chordata
C26T3:1:1112:4524:16480	Ambloplites	154	genus	95.75	2		Ambloplites	109272	109272	genus	Ambloplites	8180	family	Centrarchidae	1489940	order	Centrarchiformes	186623	class	Actinopteri	7711	phylum	Chordata
C26T3:1:1115:22739:5312	Ambloplites	154	genus	97.8	2		Ambloplites	109272	109272	genus	Ambloplites	8180	family	Centrarchidae	1489940	order	Centrarchiformes	186623	class	Actinopteri	7711	phylum	Chordata
C26T3:1:2103:7045:17333	Ambloplites	154	genus	97.75	214		Ambloplites	109272	109272	genus	Ambloplites	8180	family	Centrarchidae	1489940	order	Centrarchiformes	186623	class	Actinopteri	7711	phylum	Chordata
C26T3:1:2107:11017:19752	Ambloplites	154	genus	97.75	3		Ambloplites	109272	109272	genus	Ambloplites	8180	family	Centrarchidae	1489940	order	Centrarchiformes	186623	class	Actinopteri	7711	phylum	Chordata
C26T3:1:2110:11541:11950	Ambloplites	154	genus	95.75	2		Ambloplites	109272	109272	genus	Ambloplites	8180	family	Centrarchidae	1489940	order	Centrarchiformes	186623	class	Actinopteri	7711	phylum	Chordata
C26T3:1:1101:12691:4850	Ambloplites	152	genus	97.75	587		Ambloplites	109272	109272	genus	Ambloplites	8180	family	Centrarchidae	1489940	order	Centrarchiformes	186623	class	Actinopteri	7711	phylum	Chordata
C26T3:1:1101:18744:8568	Ambloplites	152	genus	97.75	9		Ambloplites	109272	109272	genus	Ambloplites	8180	family	Centrarchidae	1489940	order	Centrarchiformes	186623	class	Actinopteri	7711	phylum	Chordata
C26T3:1:1102:25501:5011	Ambloplites	152	genus	95.75	14		Ambloplites	109272	109272	genus	Ambloplites	8180	family	Centrarchidae	1489940	order	Centrarchiformes	186623	class	Actinopteri	7711	phylum	Chordata
C26T3:1:1102:27351:6953	Ambloplites	152	genus	97.75	15		Ambloplites	109272	109272	genus	Ambloplites	8180	family	Centrarchidae	1489940	order	Centrarchiformes	186623	class	Actinopteri	7711	phylum	Chordata
C26T3:1:1103:10111:6337	Ambloplites	152	genus	97.75	2		Ambloplites	109272	109272	genus	Ambloplites	8180	family	Centrarchidae	1489940	order	Centrarchiformes	186623	class	Actinopteri	7711	phylum	Chordata
C26T3:1:1105:4680:17505	Ambloplites	152	genus	97.75	2		Ambloplites	109272	109272	genus	Ambloplites	8180	family	Centrarchidae	1489940	order	Centrarchiformes	186623	class	Actinopteri	7711	phylum	Chordata
C26T3:1:1106:10534:22030	Ambloplites	152	genus	97.75	4		Ambloplites	109272	109272	genus	Ambloplites	8180	family	Centrarchidae	1489940	order	Centrarchiformes	186623	class	Actinopteri	7711	phylum	Chordata
C26T3:1:1107:9517:11009	Ambloplites	152	genus	97.75	3		Ambloplites	109272	109272	genus	Ambloplites	8180	family	Centrarchidae	1489940	order	Centrarchiformes	186623	class	Actinopteri	7711	phylum	Chordata
C26T3:1:1114:21742:19621	Ambloplites	152	genus	95.75	3		Ambloplites	109272	109272	genus	Ambloplites	8180	family	Centrarchidae	1489940	order	Centrarchiformes	186623	class	Actinopteri	7711	phylum	Chordata
C26T3:1:1116:19579:8720	Ambloplites	152	genus	97.75	3		Ambloplites	109272	109272	genus	Ambloplites	8180	family	Centrarchidae	1489940	order	Centrarchiformes	186623	class	Actinopteri	7711	phylum	Chordata
C26T3:1:1119:23774:24649	Ambloplites	152	genus	97.75	3		Ambloplites	109272	109272	genus	Ambloplites	8180	family	Centrarchidae	1489940	order	Centrarchiformes	186623	class	Actinopteri	7711	phylum	Chordata
C26T3:1:2105:17894:23430	Ambloplites	152	genus	97.75	2		Ambloplites	109272	109272	genus	Ambloplites	8180	family	Centrarchidae	1489940	order	Centrarchiformes	186623	class	Actinopteri	7711	phylum	Chordata
C26T3:1:2107:11728:8190	Ambloplites	152	genus	97.75	51		Ambloplites	109272	109272	genus	Ambloplites	8180	family	Centrarchidae	1489940	order	Centrarchiformes	186623	class	Actinopteri	7711	phylum	Chordata
C26T3:1:2110:7250:15316	Ambloplites	152	genus	95.75	6		Ambloplites	109272	109272	genus	Ambloplites	8180	family	Centrarchidae	1489940	order	Centrarchiformes	186623	class	Actinopteri	7711	phylum	Chordata
C26T3:1:2111:13163:13063	Ambloplites	152	genus	97.75	3		Ambloplites	109272	109272	genus	Ambloplites	8180	family	Centrarchidae	1489940	order	Centrarchiformes	186623	class	Actinopteri	7711	phylum	Chordata
C26T3:1:1111:14136:10575	Ambloplites	150	genus	95.75	4		Ambloplites	109272	109272	genus	Ambloplites	8180	family	Centrarchidae	1489940	order	Centrarchiformes	186623	class	Actinopteri	7711	phylum	Chordata
C26T3:1:1116:15325:15337	Ambloplites	150	genus	97.75	22		Ambloplites	109272	109272	genus	Ambloplites	8180	family	Centrarchidae	1489940	order	Centrarchiformes	186623	class	Actinopteri	7711	phylum	Chordata
C26T3:1:1104:5792:11585	Ameiurus	196	genus	97.1818	5		Ameiurus	50384	50384	genus	Ameiurus	7996	family	Ictaluridae	7995	order	Siluriformes	186623	class	Actinopteri	7711	phylum	Chordata
C26T3:1:2104:2323:10562	Ameiurus	189	genus	97.1818	2		Ameiurus	50384	50384	genus	Ameiurus	7996	family	Ictaluridae	7995	order	Siluriformes	186623	class	Actinopteri	7711	phylum	Chordata
C26T3:1:1101:13006:22520	Ameiurus	180	genus	98.1176	10		Ameiurus	50384	50384	genus	Ameiurus	7996	family	Ictaluridae	7995	order	Siluriformes	186623	class	Actinopteri	7711	phylum	Chordata
C26T3:1:1107:22523:18008	Ameiurus	180	genus	98.2353	2		Ameiurus	50384	50384	genus	Ameiurus	7996	family	Ictaluridae	7995	order	Siluriformes	186623	class	Actinopteri	7711	phylum	Chordata
C26T3:1:1101:10748:14281	Ameiurus	174	genus	98.2174	42		Ameiurus	50384	50384	genus	Ameiurus	7996	family	Ictaluridae	7995	order	Siluriformes	186623	class	Actinopteri	7711	phylum	Chordata
C26T3:1:2107:8464:20996	Ameiurus	174	genus	96.95	2		Ameiurus	50384	50384	genus	Ameiurus	7996	family	Ictaluridae	7995	order	Siluriformes	186623	class	Actinopteri	7711	phylum	Chordata
C26T3:1:2111:1905:14171	Ameiurus	172	genus	98.2174	2		Ameiurus	50384	50384	genus	Ameiurus	7996	family	Ictaluridae	7995	order	Siluriformes	186623	class	Actinopteri	7711	phylum	Chordata
C26T3:1:1118:11855:17592	Ameiurus	169	genus	97.2174	2		Ameiurus	50384	50384	genus	Ameiurus	7996	family	Ictaluridae	7995	order	Siluriformes	186623	class	Actinopteri	7711	phylum	Chordata
C26T3:1:1101:14314:17051	Ameiurus	167	genus	99.4118	41		Ameiurus	50384	50384	genus	Ameiurus	7996	family	Ictaluridae	7995	order	Siluriformes	186623	class	Actinopteri	7711	phylum	Chordata
C26T3:1:1101:23894:15699	Ameiurus	161	genus	95.2353	2		Ameiurus	50384	50384	genus	Ameiurus	7996	family	Ictaluridae	7995	order	Siluriformes	186623	class	Actinopteri	7711	phylum	Chordata
C26T3:1:1102:13417:23707	Ameiurus	158	genus	98.2353	2		Ameiurus	50384	50384	genus	Ameiurus	7996	family	Ictaluridae	7995	order	Siluriformes	186623	class	Actinopteri	7711	phylum	Chordata
C26T3:1:1104:26180:21122	Ameiurus	158	genus	99.3333	11		Ameiurus	50384	50384	genus	Ameiurus	7996	family	Ictaluridae	7995	order	Siluriformes	186623	class	Actinopteri	7711	phylum	Chordata
C26T3:1:2102:21956:22534	Ameiurus	158	genus	98.9545	6		Ameiurus	50384	50384	genus	Ameiurus	7996	family	Ictaluridae	7995	order	Siluriformes	186623	class	Actinopteri	7711	phylum	Chordata
C26T3:1:1101:6896:22782	Ameiurus	156	genus	99.2353	168		Ameiurus	50384	50384	genus	Ameiurus	7996	family	Ictaluridae	7995	order	Siluriformes	186623	class	Actinopteri	7711	phylum	Chordata
C26T3:1:1114:22702:1897	Ameiurus	156	genus	98.9545	3		Ameiurus	50384	50384	genus	Ameiurus	7996	family	Ictaluridae	7995	order	Siluriformes	186623	class	Actinopteri	7711	phylum	Chordata
C26T3:1:1106:6720:13653	Ameiurus	154	genus	95.2353	4		Ameiurus	50384	50384	genus	Ameiurus	7996	family	Ictaluridae	7995	order	Siluriformes	186623	class	Actinopteri	7711	phylum	Chordata
C26T3:1:1101:13869:6117	Ameiurus	152	genus	98.1176	27		Ameiurus	50384	50384	genus	Ameiurus	7996	family	Ictaluridae	7995	order	Siluriformes	186623	class	Actinopteri	7711	phylum	Chordata
C26T3:1:1101:20677:16727	Ameiurus	152	genus	98.1176	2		Ameiurus	50384	50384	genus	Ameiurus	7996	family	Ictaluridae	7995	order	Siluriformes	186623	class	Actinopteri	7711	phylum	Chordata
C26T3:1:1101:21391:8528	Ameiurus	152	genus	98.1176	6		Ameiurus	50384	50384	genus	Ameiurus	7996	family	Ictaluridae	7995	order	Siluriformes	186623	class	Actinopteri	7711	phylum	Chordata
C26T3:1:1102:24372:22096	Ameiurus	152	genus	97.6364	11		Ameiurus	50384	50384	genus	Ameiurus	7996	family	Ictaluridae	7995	order	Siluriformes	186623	class	Actinopteri	7711	phylum	Chordata
C26T3:1:1102:9749:22002	Ameiurus	152	genus	97.6364	16		Ameiurus	50384	50384	genus	Ameiurus	7996	family	Ictaluridae	7995	order	Siluriformes	186623	class	Actinopteri	7711	phylum	Chordata
C26T3:1:1103:23893:5052	Ameiurus	152	genus	97.6364	5		Ameiurus	50384	50384	genus	Ameiurus	7996	family	Ictaluridae	7995	order	Siluriformes	186623	class	Actinopteri	7711	phylum	Chordata
C26T3:1:1117:4361:19117	Ameiurus	152	genus	98.2353	2		Ameiurus	50384	50384	genus	Ameiurus	7996	family	Ictaluridae	7995	order	Siluriformes	186623	class	Actinopteri	7711	phylum	Chordata
C26T3:1:2104:11999:6003	Ameiurus	152	genus	98.1176	2		Ameiurus	50384	50384	genus	Ameiurus	7996	family	Ictaluridae	7995	order	Siluriformes	186623	class	Actinopteri	7711	phylum	Chordata
C26T3:1:2104:9727:6926	Ameiurus	152	genus	98.1176	2		Ameiurus	50384	50384	genus	Ameiurus	7996	family	Ictaluridae	7995	order	Siluriformes	186623	class	Actinopteri	7711	phylum	Chordata
C26T3:1:1114:9066:23823	Ameiurus	150	genus	96.6364	6		Ameiurus	50384	50384	genus	Ameiurus	7996	family	Ictaluridae	7995	order	Siluriformes	186623	class	Actinopteri	7711	phylum	Chordata
C26T3:1:1102:4751:18030	Anaxyrus	189	genus	97.4	16		Anaxyrus	651670	651670	genus	Anaxyrus	8382	family	Bufonidae	8342	order	Anura	8292	class	Amphibia	7711	phylum	Chordata
C26T3:1:1107:8679:14531	Anaxyrus	187	genus	97.24	17		Anaxyrus	651670	651670	genus	Anaxyrus	8382	family	Bufonidae	8342	order	Anura	8292	class	Amphibia	7711	phylum	Chordata
C26T3:1:1110:6925:5012	Anaxyrus	187	genus	97.24	3		Anaxyrus	651670	651670	genus	Anaxyrus	8382	family	Bufonidae	8342	order	Anura	8292	class	Amphibia	7711	phylum	Chordata
C26T3:1:1119:15486:8423	Anaxyrus	187	genus	97.24	2		Anaxyrus	651670	651670	genus	Anaxyrus	8382	family	Bufonidae	8342	order	Anura	8292	class	Amphibia	7711	phylum	Chordata
C26T3:1:1119:18822:14776	Anaxyrus	187	genus	97.24	6		Anaxyrus	651670	651670	genus	Anaxyrus	8382	family	Bufonidae	8342	order	Anura	8292	class	Amphibia	7711	phylum	Chordata
C26T3:1:2113:20955:5029	Anaxyrus	187	genus	97.24	2		Anaxyrus	651670	651670	genus	Anaxyrus	8382	family	Bufonidae	8342	order	Anura	8292	class	Amphibia	7711	phylum	Chordata
C26T3:1:1116:4595:8381	Anaxyrus	185	genus	97.24	2		Anaxyrus	651670	651670	genus	Anaxyrus	8382	family	Bufonidae	8342	order	Anura	8292	class	Amphibia	7711	phylum	Chordata
C26T3:1:2103:27955:12855	Anaxyrus	183	genus	98.08	2		Anaxyrus	651670	651670	genus	Anaxyrus	8382	family	Bufonidae	8342	order	Anura	8292	class	Amphibia	7711	phylum	Chordata
C26T3:1:1107:25674:5495	Anaxyrus	182	genus	96.4	3		Anaxyrus	651670	651670	genus	Anaxyrus	8382	family	Bufonidae	8342	order	Anura	8292	class	Amphibia	7711	phylum	Chordata
C26T3:1:1110:17905:10229	Anaxyrus	176	genus	99.24	8		Anaxyrus	651670	651670	genus	Anaxyrus	8382	family	Bufonidae	8342	order	Anura	8292	class	Amphibia	7711	phylum	Chordata
C26T3:1:1103:6516:16430	Anaxyrus	174	genus	99.24	13		Anaxyrus	651670	651670	genus	Anaxyrus	8382	family	Bufonidae	8342	order	Anura	8292	class	Amphibia	7711	phylum	Chordata
C26T3:1:1106:24282:12556	Anaxyrus	174	genus	99.24	4		Anaxyrus	651670	651670	genus	Anaxyrus	8382	family	Bufonidae	8342	order	Anura	8292	class	Amphibia	7711	phylum	Chordata
C26T3:1:1104:20987:23963	Anaxyrus	167	genus	99.08	12		Anaxyrus	651670	651670	genus	Anaxyrus	8382	family	Bufonidae	8342	order	Anura	8292	class	Amphibia	7711	phylum	Chordata
C26T3:1:1108:11595:11445	Anaxyrus	167	genus	99.36	2		Anaxyrus	651670	651670	genus	Anaxyrus	8382	family	Bufonidae	8342	order	Anura	8292	class	Amphibia	7711	phylum	Chordata
C26T3:1:1101:10097:10893	Anaxyrus	163	genus	99.24	29		Anaxyrus	651670	651670	genus	Anaxyrus	8382	family	Bufonidae	8342	order	Anura	8292	class	Amphibia	7711	phylum	Chordata
C26T3:1:1102:28054:11054	Anaxyrus	163	genus	99.24	103		Anaxyrus	651670	651670	genus	Anaxyrus	8382	family	Bufonidae	8342	order	Anura	8292	class	Amphibia	7711	phylum	Chordata
C26T3:1:1111:27481:10954	Anaxyrus	163	genus	99.24	5		Anaxyrus	651670	651670	genus	Anaxyrus	8382	family	Bufonidae	8342	order	Anura	8292	class	Amphibia	7711	phylum	Chordata
C26T3:1:1117:8555:22495	Anaxyrus	163	genus	99.24	8		Anaxyrus	651670	651670	genus	Anaxyrus	8382	family	Bufonidae	8342	order	Anura	8292	class	Amphibia	7711	phylum	Chordata
C26T3:1:2114:24832:5556	Anaxyrus	163	genus	99.24	2		Anaxyrus	651670	651670	genus	Anaxyrus	8382	family	Bufonidae	8342	order	Anura	8292	class	Amphibia	7711	phylum	Chordata
C26T3:1:1101:10009:14612	Anaxyrus	161	genus	98.24	19		Anaxyrus	651670	651670	genus	Anaxyrus	8382	family	Bufonidae	8342	order	Anura	8292	class	Amphibia	7711	phylum	Chordata
C26T3:1:1101:13102:12866	Anaxyrus	161	genus	98.24	58		Anaxyrus	651670	651670	genus	Anaxyrus	8382	family	Bufonidae	8342	order	Anura	8292	class	Amphibia	7711	phylum	Chordata
C26T3:1:1101:16161:6470	Anaxyrus	161	genus	98.24	7		Anaxyrus	651670	651670	genus	Anaxyrus	8382	family	Bufonidae	8342	order	Anura	8292	class	Amphibia	7711	phylum	Chordata
C26T3:1:1101:17696:11675	Anaxyrus	161	genus	98.24	8		Anaxyrus	651670	651670	genus	Anaxyrus	8382	family	Bufonidae	8342	order	Anura	8292	class	Amphibia	7711	phylum	Chordata
C26T3:1:1101:20037:8573	Anaxyrus	161	genus	98.24	7		Anaxyrus	651670	651670	genus	Anaxyrus	8382	family	Bufonidae	8342	order	Anura	8292	class	Amphibia	7711	phylum	Chordata
C26T3:1:1101:22607:3840	Anaxyrus	161	genus	98.24	2		Anaxyrus	651670	651670	genus	Anaxyrus	8382	family	Bufonidae	8342	order	Anura	8292	class	Amphibia	7711	phylum	Chordata
C26T3:1:1101:27048:11886	Anaxyrus	161	genus	98.24	89		Anaxyrus	651670	651670	genus	Anaxyrus	8382	family	Bufonidae	8342	order	Anura	8292	class	Amphibia	7711	phylum	Chordata
C26T3:1:1101:6622:16050	Anaxyrus	161	genus	98.24	4		Anaxyrus	651670	651670	genus	Anaxyrus	8382	family	Bufonidae	8342	order	Anura	8292	class	Amphibia	7711	phylum	Chordata
C26T3:1:1101:9502:4951	Anaxyrus	161	genus	98.24	7		Anaxyrus	651670	651670	genus	Anaxyrus	8382	family	Bufonidae	8342	order	Anura	8292	class	Amphibia	7711	phylum	Chordata
C26T3:1:1102:13070:9535	Anaxyrus	161	genus	98.24	8		Anaxyrus	651670	651670	genus	Anaxyrus	8382	family	Bufonidae	8342	order	Anura	8292	class	Amphibia	7711	phylum	Chordata
C26T3:1:1102:18619:3461	Anaxyrus	161	genus	98.24	9		Anaxyrus	651670	651670	genus	Anaxyrus	8382	family	Bufonidae	8342	order	Anura	8292	class	Amphibia	7711	phylum	Chordata
C26T3:1:1102:19535:11347	Anaxyrus	161	genus	98.24	8		Anaxyrus	651670	651670	genus	Anaxyrus	8382	family	Bufonidae	8342	order	Anura	8292	class	Amphibia	7711	phylum	Chordata
C26T3:1:1102:22499:23930	Anaxyrus	161	genus	98.24	8		Anaxyrus	651670	651670	genus	Anaxyrus	8382	family	Bufonidae	8342	order	Anura	8292	class	Amphibia	7711	phylum	Chordata
C26T3:1:1102:22886:21324	Anaxyrus	161	genus	98.32	6		Anaxyrus	651670	651670	genus	Anaxyrus	8382	family	Bufonidae	8342	order	Anura	8292	class	Amphibia	7711	phylum	Chordata
C26T3:1:1102:25000:19010	Anaxyrus	161	genus	98.24	7		Anaxyrus	651670	651670	genus	Anaxyrus	8382	family	Bufonidae	8342	order	Anura	8292	class	Amphibia	7711	phylum	Chordata
C26T3:1:1102:4634:9197	Anaxyrus	161	genus	98.24	10		Anaxyrus	651670	651670	genus	Anaxyrus	8382	family	Bufonidae	8342	order	Anura	8292	class	Amphibia	7711	phylum	Chordata
C26T3:1:1103:21122:15050	Anaxyrus	161	genus	98.24	2		Anaxyrus	651670	651670	genus	Anaxyrus	8382	family	Bufonidae	8342	order	Anura	8292	class	Amphibia	7711	phylum	Chordata
C26T3:1:1103:23285:17146	Anaxyrus	161	genus	98.24	4		Anaxyrus	651670	651670	genus	Anaxyrus	8382	family	Bufonidae	8342	order	Anura	8292	class	Amphibia	7711	phylum	Chordata
C26T3:1:1103:6212:18877	Anaxyrus	161	genus	98.24	3		Anaxyrus	651670	651670	genus	Anaxyrus	8382	family	Bufonidae	8342	order	Anura	8292	class	Amphibia	7711	phylum	Chordata
C26T3:1:1104:15344:6205	Anaxyrus	161	genus	98.24	15		Anaxyrus	651670	651670	genus	Anaxyrus	8382	family	Bufonidae	8342	order	Anura	8292	class	Amphibia	7711	phylum	Chordata
C26T3:1:1104:7904:3600	Anaxyrus	161	genus	98.24	6		Anaxyrus	651670	651670	genus	Anaxyrus	8382	family	Bufonidae	8342	order	Anura	8292	class	Amphibia	7711	phylum	Chordata
C26T3:1:1105:12312:21810	Anaxyrus	161	genus	98.24	4		Anaxyrus	651670	651670	genus	Anaxyrus	8382	family	Bufonidae	8342	order	Anura	8292	class	Amphibia	7711	phylum	Chordata
C26T3:1:1105:14126:3670	Anaxyrus	161	genus	98.24	2		Anaxyrus	651670	651670	genus	Anaxyrus	8382	family	Bufonidae	8342	order	Anura	8292	class	Amphibia	7711	phylum	Chordata
C26T3:1:1105:14351:22032	Anaxyrus	161	genus	98.24	4		Anaxyrus	651670	651670	genus	Anaxyrus	8382	family	Bufonidae	8342	order	Anura	8292	class	Amphibia	7711	phylum	Chordata
C26T3:1:1105:22737:5146	Anaxyrus	161	genus	98.24	7		Anaxyrus	651670	651670	genus	Anaxyrus	8382	family	Bufonidae	8342	order	Anura	8292	class	Amphibia	7711	phylum	Chordata
C26T3:1:1105:22777:14963	Anaxyrus	161	genus	98.24	7		Anaxyrus	651670	651670	genus	Anaxyrus	8382	family	Bufonidae	8342	order	Anura	8292	class	Amphibia	7711	phylum	Chordata
C26T3:1:1105:23441:9921	Anaxyrus	161	genus	98.24	4		Anaxyrus	651670	651670	genus	Anaxyrus	8382	family	Bufonidae	8342	order	Anura	8292	class	Amphibia	7711	phylum	Chordata
C26T3:1:1105:4716:6154	Anaxyrus	161	genus	98.24	6		Anaxyrus	651670	651670	genus	Anaxyrus	8382	family	Bufonidae	8342	order	Anura	8292	class	Amphibia	7711	phylum	Chordata
C26T3:1:1106:17155:21205	Anaxyrus	161	genus	98.24	6		Anaxyrus	651670	651670	genus	Anaxyrus	8382	family	Bufonidae	8342	order	Anura	8292	class	Amphibia	7711	phylum	Chordata
C26T3:1:1106:28795:8530	Anaxyrus	161	genus	98.24	2		Anaxyrus	651670	651670	genus	Anaxyrus	8382	family	Bufonidae	8342	order	Anura	8292	class	Amphibia	7711	phylum	Chordata
C26T3:1:1107:11593:21817	Anaxyrus	161	genus	98.24	3		Anaxyrus	651670	651670	genus	Anaxyrus	8382	family	Bufonidae	8342	order	Anura	8292	class	Amphibia	7711	phylum	Chordata
C26T3:1:1107:14527:22249	Anaxyrus	161	genus	98.24	6		Anaxyrus	651670	651670	genus	Anaxyrus	8382	family	Bufonidae	8342	order	Anura	8292	class	Amphibia	7711	phylum	Chordata
C26T3:1:1107:21818:22853	Anaxyrus	161	genus	98.24	11		Anaxyrus	651670	651670	genus	Anaxyrus	8382	family	Bufonidae	8342	order	Anura	8292	class	Amphibia	7711	phylum	Chordata
C26T3:1:1108:15129:9144	Anaxyrus	161	genus	98.24	4		Anaxyrus	651670	651670	genus	Anaxyrus	8382	family	Bufonidae	8342	order	Anura	8292	class	Amphibia	7711	phylum	Chordata
C26T3:1:1108:27639:13165	Anaxyrus	161	genus	98.24	5		Anaxyrus	651670	651670	genus	Anaxyrus	8382	family	Bufonidae	8342	order	Anura	8292	class	Amphibia	7711	phylum	Chordata
C26T3:1:1109:11464:16069	Anaxyrus	161	genus	98.24	15		Anaxyrus	651670	651670	genus	Anaxyrus	8382	family	Bufonidae	8342	order	Anura	8292	class	Amphibia	7711	phylum	Chordata
C26T3:1:1109:12680:6528	Anaxyrus	161	genus	98.24	3		Anaxyrus	651670	651670	genus	Anaxyrus	8382	family	Bufonidae	8342	order	Anura	8292	class	Amphibia	7711	phylum	Chordata
C26T3:1:1109:18256:7481	Anaxyrus	161	genus	98.24	5		Anaxyrus	651670	651670	genus	Anaxyrus	8382	family	Bufonidae	8342	order	Anura	8292	class	Amphibia	7711	phylum	Chordata
C26T3:1:1112:16944:1822	Anaxyrus	161	genus	98.24	4		Anaxyrus	651670	651670	genus	Anaxyrus	8382	family	Bufonidae	8342	order	Anura	8292	class	Amphibia	7711	phylum	Chordata
C26T3:1:1113:20272:22835	Anaxyrus	161	genus	98.24	2		Anaxyrus	651670	651670	genus	Anaxyrus	8382	family	Bufonidae	8342	order	Anura	8292	class	Amphibia	7711	phylum	Chordata
C26T3:1:1113:3062:19013	Anaxyrus	161	genus	98.24	4		Anaxyrus	651670	651670	genus	Anaxyrus	8382	family	Bufonidae	8342	order	Anura	8292	class	Amphibia	7711	phylum	Chordata
C26T3:1:1115:10055:21149	Anaxyrus	161	genus	98.24	3		Anaxyrus	651670	651670	genus	Anaxyrus	8382	family	Bufonidae	8342	order	Anura	8292	class	Amphibia	7711	phylum	Chordata
C26T3:1:1115:13108:17722	Anaxyrus	161	genus	98.24	3		Anaxyrus	651670	651670	genus	Anaxyrus	8382	family	Bufonidae	8342	order	Anura	8292	class	Amphibia	7711	phylum	Chordata
C26T3:1:1115:21404:8089	Anaxyrus	161	genus	98.24	3		Anaxyrus	651670	651670	genus	Anaxyrus	8382	family	Bufonidae	8342	order	Anura	8292	class	Amphibia	7711	phylum	Chordata
C26T3:1:1116:21946:18885	Anaxyrus	161	genus	98.24	4		Anaxyrus	651670	651670	genus	Anaxyrus	8382	family	Bufonidae	8342	order	Anura	8292	class	Amphibia	7711	phylum	Chordata
C26T3:1:1117:29228:12539	Anaxyrus	161	genus	98.24	3		Anaxyrus	651670	651670	genus	Anaxyrus	8382	family	Bufonidae	8342	order	Anura	8292	class	Amphibia	7711	phylum	Chordata
C26T3:1:1117:7006:11702	Anaxyrus	161	genus	98.24	2		Anaxyrus	651670	651670	genus	Anaxyrus	8382	family	Bufonidae	8342	order	Anura	8292	class	Amphibia	7711	phylum	Chordata
C26T3:1:2102:2052:10937	Anaxyrus	161	genus	98.24	3		Anaxyrus	651670	651670	genus	Anaxyrus	8382	family	Bufonidae	8342	order	Anura	8292	class	Amphibia	7711	phylum	Chordata
C26T3:1:2102:4312:18905	Anaxyrus	161	genus	98.24	2		Anaxyrus	651670	651670	genus	Anaxyrus	8382	family	Bufonidae	8342	order	Anura	8292	class	Amphibia	7711	phylum	Chordata
C26T3:1:2118:9544:5766	Anaxyrus	161	genus	98.24	2		Anaxyrus	651670	651670	genus	Anaxyrus	8382	family	Bufonidae	8342	order	Anura	8292	class	Amphibia	7711	phylum	Chordata
C26T3:1:1118:11264:9251	Anaxyrus	159	genus	98.24	3		Anaxyrus	651670	651670	genus	Anaxyrus	8382	family	Bufonidae	8342	order	Anura	8292	class	Amphibia	7711	phylum	Chordata
C26T3:1:2101:23926:5560	Anaxyrus	159	genus	98.24	7		Anaxyrus	651670	651670	genus	Anaxyrus	8382	family	Bufonidae	8342	order	Anura	8292	class	Amphibia	7711	phylum	Chordata
C26T3:1:2105:16167:16577	Anaxyrus	159	genus	98.24	4		Anaxyrus	651670	651670	genus	Anaxyrus	8382	family	Bufonidae	8342	order	Anura	8292	class	Amphibia	7711	phylum	Chordata
C26T3:1:2105:22936:19842	Anaxyrus	159	genus	98.24	9		Anaxyrus	651670	651670	genus	Anaxyrus	8382	family	Bufonidae	8342	order	Anura	8292	class	Amphibia	7711	phylum	Chordata
C26T3:1:2106:6031:22796	Anaxyrus	159	genus	98.48	2		Anaxyrus	651670	651670	genus	Anaxyrus	8382	family	Bufonidae	8342	order	Anura	8292	class	Amphibia	7711	phylum	Chordata
C26T3:1:2115:12996:14921	Anaxyrus	159	genus	98.24	2		Anaxyrus	651670	651670	genus	Anaxyrus	8382	family	Bufonidae	8342	order	Anura	8292	class	Amphibia	7711	phylum	Chordata
C26T3:1:2118:8460:7022	Anaxyrus	159	genus	98.24	2		Anaxyrus	651670	651670	genus	Anaxyrus	8382	family	Bufonidae	8342	order	Anura	8292	class	Amphibia	7711	phylum	Chordata
C26T3:1:1101:17761:19047	Anaxyrus	156	genus	97.24	18		Anaxyrus	651670	651670	genus	Anaxyrus	8382	family	Bufonidae	8342	order	Anura	8292	class	Amphibia	7711	phylum	Chordata
C26T3:1:1101:4064:9726	Anaxyrus	156	genus	97.24	12		Anaxyrus	651670	651670	genus	Anaxyrus	8382	family	Bufonidae	8342	order	Anura	8292	class	Amphibia	7711	phylum	Chordata
C26T3:1:1102:4576:8423	Anaxyrus	156	genus	97.6	2		Anaxyrus	651670	651670	genus	Anaxyrus	8382	family	Bufonidae	8342	order	Anura	8292	class	Amphibia	7711	phylum	Chordata
C26T3:1:1102:8817:6184	Anaxyrus	156	genus	97.24	9		Anaxyrus	651670	651670	genus	Anaxyrus	8382	family	Bufonidae	8342	order	Anura	8292	class	Amphibia	7711	phylum	Chordata
C26T3:1:1103:15839:4776	Anaxyrus	156	genus	97.24	13		Anaxyrus	651670	651670	genus	Anaxyrus	8382	family	Bufonidae	8342	order	Anura	8292	class	Amphibia	7711	phylum	Chordata
C26T3:1:1103:17563:19000	Anaxyrus	156	genus	97.24	5		Anaxyrus	651670	651670	genus	Anaxyrus	8382	family	Bufonidae	8342	order	Anura	8292	class	Amphibia	7711	phylum	Chordata
C26T3:1:1104:20305:12499	Anaxyrus	156	genus	97.24	7		Anaxyrus	651670	651670	genus	Anaxyrus	8382	family	Bufonidae	8342	order	Anura	8292	class	Amphibia	7711	phylum	Chordata
C26T3:1:1104:20655:18088	Anaxyrus	156	genus	97.24	7		Anaxyrus	651670	651670	genus	Anaxyrus	8382	family	Bufonidae	8342	order	Anura	8292	class	Amphibia	7711	phylum	Chordata
C26T3:1:1104:2762:12363	Anaxyrus	156	genus	97.24	2		Anaxyrus	651670	651670	genus	Anaxyrus	8382	family	Bufonidae	8342	order	Anura	8292	class	Amphibia	7711	phylum	Chordata
C26T3:1:1109:22960:11495	Anaxyrus	156	genus	97.24	4		Anaxyrus	651670	651670	genus	Anaxyrus	8382	family	Bufonidae	8342	order	Anura	8292	class	Amphibia	7711	phylum	Chordata
C26T3:1:1110:11186:11951	Anaxyrus	156	genus	97.48	5		Anaxyrus	651670	651670	genus	Anaxyrus	8382	family	Bufonidae	8342	order	Anura	8292	class	Amphibia	7711	phylum	Chordata
C26T3:1:1116:3755:13351	Anaxyrus	156	genus	97.24	3		Anaxyrus	651670	651670	genus	Anaxyrus	8382	family	Bufonidae	8342	order	Anura	8292	class	Amphibia	7711	phylum	Chordata
C26T3:1:1118:22480:8911	Anaxyrus	156	genus	97.24	3		Anaxyrus	651670	651670	genus	Anaxyrus	8382	family	Bufonidae	8342	order	Anura	8292	class	Amphibia	7711	phylum	Chordata
C26T3:1:2110:28577:12322	Anaxyrus	156	genus	97.24	7		Anaxyrus	651670	651670	genus	Anaxyrus	8382	family	Bufonidae	8342	order	Anura	8292	class	Amphibia	7711	phylum	Chordata
C26T3:1:1107:9272:18665	Ardea	213	genus	97.6364	4		Ardea	30389	30389	genus	Ardea	8899	family	Ardeidae	9205	order	Pelecaniformes	8782	class	Aves	7711	phylum	Chordata
C26T3:1:1104:10794:20924	Ardea	196	genus	98.5455	2		Ardea	30389	30389	genus	Ardea	8899	family	Ardeidae	9205	order	Pelecaniformes	8782	class	Aves	7711	phylum	Chordata
C26T3:1:2106:3330:15741	Ardea	163	genus	97.6364	4		Ardea	30389	30389	genus	Ardea	8899	family	Ardeidae	9205	order	Pelecaniformes	8782	class	Aves	7711	phylum	Chordata
C26T3:1:1108:26709:10368	Ardea	158	genus	96.6364	7		Ardea	30389	30389	genus	Ardea	8899	family	Ardeidae	9205	order	Pelecaniformes	8782	class	Aves	7711	phylum	Chordata
C26T3:1:1101:14806:18832	Bos	235	genus	98.125	2		Bos	9903	9903	genus	Bos	9895	family	Bovidae	91561	order	Artiodactyla	40674	class	Mammalia	7711	phylum	Chordata
C26T3:1:1107:11632:8847	Bos	219	genus	99.0833	4		Bos	9903	9903	genus	Bos	9895	family	Bovidae	91561	order	Artiodactyla	40674	class	Mammalia	7711	phylum	Chordata
C26T3:1:1103:19789:2551	Bos	191	genus	95.0833	2		Bos	9903	9903	genus	Bos	9895	family	Bovidae	91561	order	Artiodactyla	40674	class	Mammalia	7711	phylum	Chordata
C26T3:1:1106:2482:14814	Bos	187	genus	96.0417	2		Bos	9903	9903	genus	Bos	9895	family	Bovidae	91561	order	Artiodactyla	40674	class	Mammalia	7711	phylum	Chordata
C26T3:1:2116:5205:4842	Bos	167	genus	96.0417	2		Bos	9903	9903	genus	Bos	9895	family	Bovidae	91561	order	Artiodactyla	40674	class	Mammalia	7711	phylum	Chordata
C26T3:1:1114:6814:23293	Bos	159	genus	96	6		Bos	9903	9903	genus	Bos	9895	family	Bovidae	91561	order	Artiodactyla	40674	class	Mammalia	7711	phylum	Chordata
C26T3:1:1101:22110:9015	Bos	158	genus	98	14		Bos	9903	9903	genus	Bos	9895	family	Bovidae	91561	order	Artiodactyla	40674	class	Mammalia	7711	phylum	Chordata
C26T3:1:1110:4779:18707	Bos	156	genus	98	2		Bos	9903	9903	genus	Bos	9895	family	Bovidae	91561	order	Artiodactyla	40674	class	Mammalia	7711	phylum	Chordata
C26T3:1:1107:10835:6903	Bos	154	genus	95	3		Bos	9903	9903	genus	Bos	9895	family	Bovidae	91561	order	Artiodactyla	40674	class	Mammalia	7711	phylum	Chordata
C26T3:1:1109:11511:4860	Bos	154	genus	99	8		Bos	9903	9903	genus	Bos	9895	family	Bovidae	91561	order	Artiodactyla	40674	class	Mammalia	7711	phylum	Chordata
C26T3:1:2107:23020:6558	Bos	152	genus	98	2		Bos	9903	9903	genus	Bos	9895	family	Bovidae	91561	order	Artiodactyla	40674	class	Mammalia	7711	phylum	Chordata
C26T3:1:1102:17401:14193	Bos	150	genus	96	9		Bos	9903	9903	genus	Bos	9895	family	Bovidae	91561	order	Artiodactyla	40674	class	Mammalia	7711	phylum	Chordata
C26T3:1:1112:10800:2770	Bos	150	genus	95.0417	5		Bos	9903	9903	genus	Bos	9895	family	Bovidae	91561	order	Artiodactyla	40674	class	Mammalia	7711	phylum	Chordata
C26T3:1:1109:15510:3152	Callonetta	193	genus	96	2		Callonetta	75870	75870	genus	Callonetta	8830	family	Anatidae	8826	order	Anseriformes	8782	class	Aves	7711	phylum	Chordata
C26T3:1:1101:13231:20303	Callonetta	191	genus	96	8		Callonetta	75870	75870	genus	Callonetta	8830	family	Anatidae	8826	order	Anseriformes	8782	class	Aves	7711	phylum	Chordata
C26T3:1:1103:24725:20671	Callonetta	191	genus	96	7		Callonetta	75870	75870	genus	Callonetta	8830	family	Anatidae	8826	order	Anseriformes	8782	class	Aves	7711	phylum	Chordata
C26T3:1:2102:23211:16047	Callonetta	169	genus	95	5		Callonetta	75870	75870	genus	Callonetta	8830	family	Anatidae	8826	order	Anseriformes	8782	class	Aves	7711	phylum	Chordata
C26T3:1:2102:24727:4845	Callonetta	169	genus	95	2		Callonetta	75870	75870	genus	Callonetta	8830	family	Anatidae	8826	order	Anseriformes	8782	class	Aves	7711	phylum	Chordata
C26T3:1:1110:20462:16117	Callonetta	165	genus	96	2		Callonetta	75870	75870	genus	Callonetta	8830	family	Anatidae	8826	order	Anseriformes	8782	class	Aves	7711	phylum	Chordata
C26T3:1:1109:14715:6696	Callonetta	163	genus	95	3		Callonetta	75870	75870	genus	Callonetta	8830	family	Anatidae	8826	order	Anseriformes	8782	class	Aves	7711	phylum	Chordata
C26T3:1:2112:19913:4555	Callonetta	163	genus	95	22		Callonetta	75870	75870	genus	Callonetta	8830	family	Anatidae	8826	order	Anseriformes	8782	class	Aves	7711	phylum	Chordata
C26T3:1:1101:8776:12049	Canis	171	genus	98.84	14		Canis	9611	9611	genus	Canis	9608	family	Canidae	33554	order	Carnivora	40674	class	Mammalia	7711	phylum	Chordata
C26T3:1:1103:26599:13021	Canis	163	genus	97	2		Canis	9611	9611	genus	Canis	9608	family	Canidae	33554	order	Carnivora	40674	class	Mammalia	7711	phylum	Chordata
C26T3:1:1109:12467:17282	Canis	156	genus	99	3		Canis	9611	9611	genus	Canis	9608	family	Canidae	33554	order	Carnivora	40674	class	Mammalia	7711	phylum	Chordata
C26T3:1:1105:16531:11381	Capoeta	161	genus	95.3333	3		Capoeta	116044	116044	genus	Capoeta	7953	family	Cyprinidae	7952	order	Cypriniformes	186623	class	Actinopteri	7711	phylum	Chordata
C26T3:1:1110:8995:9410	Carpiodes	154	genus	95	6		Carpiodes	154810	154810	genus	Carpiodes	7968	family	Catostomidae	7952	order	Cypriniformes	186623	class	Actinopteri	7711	phylum	Chordata
C26T3:1:1117:21540:22173	Catostomus	195	genus	95.8333	2		Catostomus	7969	7969	genus	Catostomus	7968	family	Catostomidae	7952	order	Cypriniformes	186623	class	Actinopteri	7711	phylum	Chordata
C26T3:1:1101:14407:5956	Catostomus	163	genus	97.75	10		Catostomus	7969	7969	genus	Catostomus	7968	family	Catostomidae	7952	order	Cypriniformes	186623	class	Actinopteri	7711	phylum	Chordata
C26T3:1:1101:24186:19515	Catostomus	163	genus	97.75	4		Catostomus	7969	7969	genus	Catostomus	7968	family	Catostomidae	7952	order	Cypriniformes	186623	class	Actinopteri	7711	phylum	Chordata
C26T3:1:1101:6656:10611	Catostomus	163	genus	96.8333	2		Catostomus	7969	7969	genus	Catostomus	7968	family	Catostomidae	7952	order	Cypriniformes	186623	class	Actinopteri	7711	phylum	Chordata
C26T3:1:1103:22301:12358	Catostomus	163	genus	96.8333	5		Catostomus	7969	7969	genus	Catostomus	7968	family	Catostomidae	7952	order	Cypriniformes	186623	class	Actinopteri	7711	phylum	Chordata
C26T3:1:1103:2792:11323	Catostomus	163	genus	98.9231	5		Catostomus	7969	7969	genus	Catostomus	7968	family	Catostomidae	7952	order	Cypriniformes	186623	class	Actinopteri	7711	phylum	Chordata
C26T3:1:1104:16952:5093	Catostomus	163	genus	97.75	4		Catostomus	7969	7969	genus	Catostomus	7968	family	Catostomidae	7952	order	Cypriniformes	186623	class	Actinopteri	7711	phylum	Chordata
C26T3:1:1105:11503:6965	Catostomus	163	genus	97.75	2		Catostomus	7969	7969	genus	Catostomus	7968	family	Catostomidae	7952	order	Cypriniformes	186623	class	Actinopteri	7711	phylum	Chordata
C26T3:1:1106:20336:24074	Catostomus	163	genus	96.8333	2		Catostomus	7969	7969	genus	Catostomus	7968	family	Catostomidae	7952	order	Cypriniformes	186623	class	Actinopteri	7711	phylum	Chordata
C26T3:1:1119:15237:21795	Catostomus	163	genus	97.0769	2		Catostomus	7969	7969	genus	Catostomus	7968	family	Catostomidae	7952	order	Cypriniformes	186623	class	Actinopteri	7711	phylum	Chordata
C26T3:1:1103:7484:14031	Catostomus	161	genus	96.8333	2		Catostomus	7969	7969	genus	Catostomus	7968	family	Catostomidae	7952	order	Cypriniformes	186623	class	Actinopteri	7711	phylum	Chordata
C26T3:1:2102:12308:19401	Catostomus	159	genus	98.9231	5		Catostomus	7969	7969	genus	Catostomus	7968	family	Catostomidae	7952	order	Cypriniformes	186623	class	Actinopteri	7711	phylum	Chordata
C26T3:1:1103:25614:15766	Catostomus	158	genus	96.75	8		Catostomus	7969	7969	genus	Catostomus	7968	family	Catostomidae	7952	order	Cypriniformes	186623	class	Actinopteri	7711	phylum	Chordata
C26T3:1:2112:13916:5910	Catostomus	152	genus	95	6		Catostomus	7969	7969	genus	Catostomus	7968	family	Catostomidae	7952	order	Cypriniformes	186623	class	Actinopteri	7711	phylum	Chordata
C26T3:1:1104:10309:6171	Catostomus	150	genus	96.7692	21		Catostomus	7969	7969	genus	Catostomus	7968	family	Catostomidae	7952	order	Cypriniformes	186623	class	Actinopteri	7711	phylum	Chordata
C26T3:1:1114:12867:5650	Centrocercus	169	genus	95.5	2		Centrocercus	9001	9001	genus	Centrocercus	9005	family	Phasianidae	8976	order	Galliformes	8782	class	Aves	7711	phylum	Chordata
C26T3:1:1103:8030:5926	Centrocercus	159	genus	95.5	4		Centrocercus	9001	9001	genus	Centrocercus	9005	family	Phasianidae	8976	order	Galliformes	8782	class	Aves	7711	phylum	Chordata
C26T3:1:1101:20852:5726	Centrocercus	152	genus	97.5	10		Centrocercus	9001	9001	genus	Centrocercus	9005	family	Phasianidae	8976	order	Galliformes	8782	class	Aves	7711	phylum	Chordata
C26T3:1:1108:3488:15590	Chelydra	161	genus	100	7		Chelydra	8474	8474	genus	Chelydra	8473	family	Chelydridae	8459	order	Testudines	7711	phylum	Chordata
C26T3:1:1101:5169:4572	Chelydra	158	genus	95	6		Chelydra	8474	8474	genus	Chelydra	8473	family	Chelydridae	8459	order	Testudines	7711	phylum	Chordata
C26T3:1:1101:26328:21961	Chrosomus	163	genus	99.3333	45		Chrosomus	1046118	1046118	genus	Chrosomus	7953	family	Cyprinidae	7952	order	Cypriniformes	186623	class	Actinopteri	7711	phylum	Chordata
C26T3:1:1109:5616:13852	Chrosomus	163	genus	95.3333	2		Chrosomus	1046118	1046118	genus	Chrosomus	7953	family	Cyprinidae	7952	order	Cypriniformes	186623	class	Actinopteri	7711	phylum	Chordata
C26T3:1:1101:11690:24427	Chrosomus	159	genus	96.3333	25		Chrosomus	1046118	1046118	genus	Chrosomus	7953	family	Cyprinidae	7952	order	Cypriniformes	186623	class	Actinopteri	7711	phylum	Chordata
C26T3:1:1101:26986:14194	Chrosomus	152	genus	97.3333	85		Chrosomus	1046118	1046118	genus	Chrosomus	7953	family	Cyprinidae	7952	order	Cypriniformes	186623	class	Actinopteri	7711	phylum	Chordata
C26T3:1:1103:20247:7885	Chrysichthys	158	genus	96	2		Chrysichthys	236587	236587	genus	Chrysichthys	2485743	family	Claroteidae	7995	order	Siluriformes	186623	class	Actinopteri	7711	phylum	Chordata
C26T3:1:1110:12438:10364	Chrysichthys	152	genus	95	3		Chrysichthys	236587	236587	genus	Chrysichthys	2485743	family	Claroteidae	7995	order	Siluriformes	186623	class	Actinopteri	7711	phylum	Chordata
C26T3:1:2114:17379:11250	Condylura	161	genus	98	3		Condylura	143301	143301	genus	Condylura	9373	family	Talpidae	9362	order	Eulipotyphla	40674	class	Mammalia	7711	phylum	Chordata
C26T3:1:1110:19918:3363	Condylura	159	genus	99	2		Condylura	143301	143301	genus	Condylura	9373	family	Talpidae	9362	order	Eulipotyphla	40674	class	Mammalia	7711	phylum	Chordata
C26T3:1:1102:17095:2108	Coreoperca	161	genus	96	7		Coreoperca	215344	215344	genus	Coreoperca	119486	family	Sinipercidae	1489940	order	Centrarchiformes	186623	class	Actinopteri	7711	phylum	Chordata
C26T3:1:1103:23597:7165	Coreoperca	161	genus	96	20		Coreoperca	215344	215344	genus	Coreoperca	119486	family	Sinipercidae	1489940	order	Centrarchiformes	186623	class	Actinopteri	7711	phylum	Chordata
C26T3:1:2114:10736:19959	Coreoperca	156	genus	95	2		Coreoperca	215344	215344	genus	Coreoperca	119486	family	Sinipercidae	1489940	order	Centrarchiformes	186623	class	Actinopteri	7711	phylum	Chordata
C26T3:1:1108:9995:24481	Culaea	182	genus	95	3		Culaea	240155	240155	genus	Culaea	69291	family	Gasterosteidae	8111	order	Perciformes	186623	class	Actinopteri	7711	phylum	Chordata
C26T3:1:1102:18260:7961	Culaea	161	genus	98	57		Culaea	240155	240155	genus	Culaea	69291	family	Gasterosteidae	8111	order	Perciformes	186623	class	Actinopteri	7711	phylum	Chordata
C26T3:1:2110:9026:4866	Culaea	161	genus	98	2		Culaea	240155	240155	genus	Culaea	69291	family	Gasterosteidae	8111	order	Perciformes	186623	class	Actinopteri	7711	phylum	Chordata
C26T3:1:2111:2186:16060	Culaea	161	genus	95	2		Culaea	240155	240155	genus	Culaea	69291	family	Gasterosteidae	8111	order	Perciformes	186623	class	Actinopteri	7711	phylum	Chordata
C26T3:1:1109:10363:9512	Culaea	159	genus	96	2		Culaea	240155	240155	genus	Culaea	69291	family	Gasterosteidae	8111	order	Perciformes	186623	class	Actinopteri	7711	phylum	Chordata
C26T3:1:1119:11716:1442	Culaea	159	genus	98	5		Culaea	240155	240155	genus	Culaea	69291	family	Gasterosteidae	8111	order	Perciformes	186623	class	Actinopteri	7711	phylum	Chordata
C26T3:1:2111:16938:4717	Culaea	159	genus	98	6		Culaea	240155	240155	genus	Culaea	69291	family	Gasterosteidae	8111	order	Perciformes	186623	class	Actinopteri	7711	phylum	Chordata
C26T3:1:1101:18058:21661	Culaea	158	genus	96	10		Culaea	240155	240155	genus	Culaea	69291	family	Gasterosteidae	8111	order	Perciformes	186623	class	Actinopteri	7711	phylum	Chordata
C26T3:1:1101:21534:16405	Culaea	158	genus	97	41		Culaea	240155	240155	genus	Culaea	69291	family	Gasterosteidae	8111	order	Perciformes	186623	class	Actinopteri	7711	phylum	Chordata
C26T3:1:1105:18993:18899	Culaea	158	genus	97	2		Culaea	240155	240155	genus	Culaea	69291	family	Gasterosteidae	8111	order	Perciformes	186623	class	Actinopteri	7711	phylum	Chordata
C26T3:1:1113:18609:17443	Culaea	158	genus	99	4		Culaea	240155	240155	genus	Culaea	69291	family	Gasterosteidae	8111	order	Perciformes	186623	class	Actinopteri	7711	phylum	Chordata
C26T3:1:1114:16123:18318	Culaea	158	genus	97	2		Culaea	240155	240155	genus	Culaea	69291	family	Gasterosteidae	8111	order	Perciformes	186623	class	Actinopteri	7711	phylum	Chordata
C26T3:1:2110:8817:21909	Culaea	158	genus	97	2		Culaea	240155	240155	genus	Culaea	69291	family	Gasterosteidae	8111	order	Perciformes	186623	class	Actinopteri	7711	phylum	Chordata
C26T3:1:1102:13956:15106	Culaea	156	genus	99	27		Culaea	240155	240155	genus	Culaea	69291	family	Gasterosteidae	8111	order	Perciformes	186623	class	Actinopteri	7711	phylum	Chordata
C26T3:1:1102:16291:22792	Culaea	156	genus	95	26		Culaea	240155	240155	genus	Culaea	69291	family	Gasterosteidae	8111	order	Perciformes	186623	class	Actinopteri	7711	phylum	Chordata
C26T3:1:1108:15919:9592	Culaea	156	genus	95	2		Culaea	240155	240155	genus	Culaea	69291	family	Gasterosteidae	8111	order	Perciformes	186623	class	Actinopteri	7711	phylum	Chordata
C26T3:1:1105:14661:10436	Culaea	154	genus	97	7		Culaea	240155	240155	genus	Culaea	69291	family	Gasterosteidae	8111	order	Perciformes	186623	class	Actinopteri	7711	phylum	Chordata
C26T3:1:1108:15054:13258	Culaea	152	genus	98	3		Culaea	240155	240155	genus	Culaea	69291	family	Gasterosteidae	8111	order	Perciformes	186623	class	Actinopteri	7711	phylum	Chordata
C26T3:1:1118:7515:6224	Culaea	152	genus	96	3		Culaea	240155	240155	genus	Culaea	69291	family	Gasterosteidae	8111	order	Perciformes	186623	class	Actinopteri	7711	phylum	Chordata
C26T3:1:2101:13506:8264	Culaea	152	genus	96	2		Culaea	240155	240155	genus	Culaea	69291	family	Gasterosteidae	8111	order	Perciformes	186623	class	Actinopteri	7711	phylum	Chordata
C26T3:1:2101:13745:22407	Culaea	152	genus	96	2		Culaea	240155	240155	genus	Culaea	69291	family	Gasterosteidae	8111	order	Perciformes	186623	class	Actinopteri	7711	phylum	Chordata
C26T3:1:1101:12479:16175	Cyprinella	163	genus	96.3333	35		Cyprinella	13476	13476	genus	Cyprinella	7953	family	Cyprinidae	7952	order	Cypriniformes	186623	class	Actinopteri	7711	phylum	Chordata
C26T3:1:1101:10118:5682	Cyprinella	161	genus	98.6667	35		Cyprinella	13476	13476	genus	Cyprinella	7953	family	Cyprinidae	7952	order	Cypriniformes	186623	class	Actinopteri	7711	phylum	Chordata
C26T3:1:1103:7165:10786	Cyprinella	161	genus	97.3333	9		Cyprinella	13476	13476	genus	Cyprinella	7953	family	Cyprinidae	7952	order	Cypriniformes	186623	class	Actinopteri	7711	phylum	Chordata
C26T3:1:1117:11780:13236	Cyprinella	161	genus	95.8571	2		Cyprinella	13476	13476	genus	Cyprinella	7953	family	Cyprinidae	7952	order	Cypriniformes	186623	class	Actinopteri	7711	phylum	Chordata
C26T3:1:2104:23675:11165	Cyprinella	161	genus	95.1667	2		Cyprinella	13476	13476	genus	Cyprinella	7953	family	Cyprinidae	7952	order	Cypriniformes	186623	class	Actinopteri	7711	phylum	Chordata
C26T3:1:1111:20854:12622	Cyprinella	158	genus	95.3333	6		Cyprinella	13476	13476	genus	Cyprinella	7953	family	Cyprinidae	7952	order	Cypriniformes	186623	class	Actinopteri	7711	phylum	Chordata
C26T3:1:1102:15660:14368	Cyprinella	156	genus	95	5		Cyprinella	13476	13476	genus	Cyprinella	7953	family	Cyprinidae	7952	order	Cypriniformes	186623	class	Actinopteri	7711	phylum	Chordata
C26T3:1:1105:25381:10552	Cyprinella	156	genus	97	27		Cyprinella	13476	13476	genus	Cyprinella	7953	family	Cyprinidae	7952	order	Cypriniformes	186623	class	Actinopteri	7711	phylum	Chordata
C26T3:1:2111:12174:13109	Cyprinella	156	genus	96.6667	2		Cyprinella	13476	13476	genus	Cyprinella	7953	family	Cyprinidae	7952	order	Cypriniformes	186623	class	Actinopteri	7711	phylum	Chordata
C26T3:1:1108:24260:2106	Cyprinella	154	genus	96	6		Cyprinella	13476	13476	genus	Cyprinella	7953	family	Cyprinidae	7952	order	Cypriniformes	186623	class	Actinopteri	7711	phylum	Chordata
C26T3:1:1109:24681:8985	Cyprinella	154	genus	96	82		Cyprinella	13476	13476	genus	Cyprinella	7953	family	Cyprinidae	7952	order	Cypriniformes	186623	class	Actinopteri	7711	phylum	Chordata
C26T3:1:1101:10533:15616	Cyprinella	150	genus	96	503		Cyprinella	13476	13476	genus	Cyprinella	7953	family	Cyprinidae	7952	order	Cypriniformes	186623	class	Actinopteri	7711	phylum	Chordata
C26T3:1:1101:29159:11794	Cyprinella	150	genus	96	2		Cyprinella	13476	13476	genus	Cyprinella	7953	family	Cyprinidae	7952	order	Cypriniformes	186623	class	Actinopteri	7711	phylum	Chordata
C26T3:1:2102:14953:22901	Esox	187	genus	96.5385	2		Esox	8009	8009	genus	Esox	8008	family	Esocidae	8007	order	Esociformes	186623	class	Actinopteri	7711	phylum	Chordata
C26T3:1:1110:23421:11121	Esox	172	genus	98.625	4		Esox	8009	8009	genus	Esox	8008	family	Esocidae	8007	order	Esociformes	186623	class	Actinopteri	7711	phylum	Chordata
C26T3:1:1115:8725:16153	Esox	163	genus	95.75	3		Esox	8009	8009	genus	Esox	8008	family	Esocidae	8007	order	Esociformes	186623	class	Actinopteri	7711	phylum	Chordata
C26T3:1:2107:16081:3846	Esox	161	genus	99	4		Esox	8009	8009	genus	Esox	8008	family	Esocidae	8007	order	Esociformes	186623	class	Actinopteri	7711	phylum	Chordata
C26T3:1:1110:19954:7674	Esox	159	genus	98.5	2		Esox	8009	8009	genus	Esox	8008	family	Esocidae	8007	order	Esociformes	186623	class	Actinopteri	7711	phylum	Chordata
C26T3:1:1103:13524:21661	Esox	154	genus	97.2222	11		Esox	8009	8009	genus	Esox	8008	family	Esocidae	8007	order	Esociformes	186623	class	Actinopteri	7711	phylum	Chordata
C26T3:1:1104:12525:21502	Esox	152	genus	96.2308	6		Esox	8009	8009	genus	Esox	8008	family	Esocidae	8007	order	Esociformes	186623	class	Actinopteri	7711	phylum	Chordata
C26T3:1:1112:23599:22655	Esox	152	genus	98.2778	6		Esox	8009	8009	genus	Esox	8008	family	Esocidae	8007	order	Esociformes	186623	class	Actinopteri	7711	phylum	Chordata
C26T3:1:1101:15205:6384	Etheostoma	206	genus	95.76	5		Etheostoma	909693	54318	genus	Etheostoma	8165	family	Percidae	8111	order	Perciformes	186623	class	Actinopteri	7711	phylum	Chordata
C26T3:1:1110:25539:12726	Etheostoma	204	genus	96.6	2		Etheostoma	909693	54318	genus	Etheostoma	8165	family	Percidae	8111	order	Perciformes	186623	class	Actinopteri	7711	phylum	Chordata
C26T3:1:1116:15768:6514	Etheostoma	204	genus	96	2		Etheostoma	909693	54318	genus	Etheostoma	8165	family	Percidae	8111	order	Perciformes	186623	class	Actinopteri	7711	phylum	Chordata
C26T3:1:1103:3251:14248	Etheostoma	202	genus	96	8		Etheostoma	909693	54318	genus	Etheostoma	8165	family	Percidae	8111	order	Perciformes	186623	class	Actinopteri	7711	phylum	Chordata
C26T3:1:1101:2899:14174	Etheostoma	200	genus	96.2308	2		Etheostoma	909693	54318	genus	Etheostoma	8165	family	Percidae	8111	order	Perciformes	186623	class	Actinopteri	7711	phylum	Chordata
C26T3:1:1102:8061:22022	Etheostoma	198	genus	95.1667	5		Etheostoma	909693	54318	genus	Etheostoma	8165	family	Percidae	8111	order	Perciformes	186623	class	Actinopteri	7711	phylum	Chordata
C26T3:1:1101:15983:10480	Etheostoma	196	genus	95.64	5		Etheostoma	909693	54318	genus	Etheostoma	8165	family	Percidae	8111	order	Perciformes	186623	class	Actinopteri	7711	phylum	Chordata
C26T3:1:1111:8435:9861	Etheostoma	196	genus	95.08	5		Etheostoma	909693	54318	genus	Etheostoma	8165	family	Percidae	8111	order	Perciformes	186623	class	Actinopteri	7711	phylum	Chordata
C26T3:1:2103:13195:7299	Etheostoma	196	genus	96.05	2		Etheostoma	909693	54318	genus	Etheostoma	8165	family	Percidae	8111	order	Perciformes	186623	class	Actinopteri	7711	phylum	Chordata
C26T3:1:1118:3990:18710	Etheostoma	195	genus	95.625	8		Etheostoma	909693	54318	genus	Etheostoma	8165	family	Percidae	8111	order	Perciformes	186623	class	Actinopteri	7711	phylum	Chordata
C26T3:1:1111:18675:5569	Etheostoma	193	genus	95.1429	3		Etheostoma	909693	54318	genus	Etheostoma	8165	family	Percidae	8111	order	Perciformes	186623	class	Actinopteri	7711	phylum	Chordata
C26T3:1:1107:21320:18621	Etheostoma	187	genus	95.3636	9		Etheostoma	909693	54318	genus	Etheostoma	8165	family	Percidae	8111	order	Perciformes	186623	class	Actinopteri	7711	phylum	Chordata
C26T3:1:1116:12349:9342	Etheostoma	183	genus	95.3636	2		Etheostoma	909693	54318	genus	Etheostoma	8165	family	Percidae	8111	order	Perciformes	186623	class	Actinopteri	7711	phylum	Chordata
C26T3:1:1117:24080:22896	Etheostoma	183	genus	96.4286	2		Etheostoma	909693	54318	genus	Etheostoma	8165	family	Percidae	8111	order	Perciformes	186623	class	Actinopteri	7711	phylum	Chordata
C26T3:1:1117:9267:6596	Etheostoma	183	genus	96.9583	3		Etheostoma	909693	54318	genus	Etheostoma	8165	family	Percidae	8111	order	Perciformes	186623	class	Actinopteri	7711	phylum	Chordata
C26T3:1:1101:25948:4249	Etheostoma	176	genus	95.64	3		Etheostoma	909693	54318	genus	Etheostoma	8165	family	Percidae	8111	order	Perciformes	186623	class	Actinopteri	7711	phylum	Chordata
C26T3:1:1102:6951:12804	Etheostoma	176	genus	95.3333	2		Etheostoma	909693	54318	genus	Etheostoma	8165	family	Percidae	8111	order	Perciformes	186623	class	Actinopteri	7711	phylum	Chordata
C26T3:1:2108:8111:3135	Etheostoma	176	genus	95.5909	3		Etheostoma	909693	54318	genus	Etheostoma	8165	family	Percidae	8111	order	Perciformes	186623	class	Actinopteri	7711	phylum	Chordata
C26T3:1:1115:14179:5810	Etheostoma	174	genus	95.8636	3		Etheostoma	909693	54318	genus	Etheostoma	8165	family	Percidae	8111	order	Perciformes	186623	class	Actinopteri	7711	phylum	Chordata
C26T3:1:1115:4324:15610	Etheostoma	174	genus	96.2	35		Etheostoma	909693	54318	genus	Etheostoma	8165	family	Percidae	8111	order	Perciformes	186623	class	Actinopteri	7711	phylum	Chordata
C26T3:1:2112:17283:6457	Etheostoma	174	genus	96.2	3		Etheostoma	909693	54318	genus	Etheostoma	8165	family	Percidae	8111	order	Perciformes	186623	class	Actinopteri	7711	phylum	Chordata
C26T3:1:1101:14196:19141	Etheostoma	172	genus	95.12	11		Etheostoma	909693	54318	genus	Etheostoma	8165	family	Percidae	8111	order	Perciformes	186623	class	Actinopteri	7711	phylum	Chordata
C26T3:1:1101:16014:19722	Etheostoma	172	genus	95.6818	47		Etheostoma	909693	54318	genus	Etheostoma	8165	family	Percidae	8111	order	Perciformes	186623	class	Actinopteri	7711	phylum	Chordata
C26T3:1:1101:20427:1177	Etheostoma	172	genus	95.12	3		Etheostoma	909693	54318	genus	Etheostoma	8165	family	Percidae	8111	order	Perciformes	186623	class	Actinopteri	7711	phylum	Chordata
C26T3:1:1101:20516:5511	Etheostoma	172	genus	95.5909	133		Etheostoma	909693	54318	genus	Etheostoma	8165	family	Percidae	8111	order	Perciformes	186623	class	Actinopteri	7711	phylum	Chordata
C26T3:1:1101:2346:9175	Etheostoma	172	genus	95.375	19		Etheostoma	909693	54318	genus	Etheostoma	8165	family	Percidae	8111	order	Perciformes	186623	class	Actinopteri	7711	phylum	Chordata
C26T3:1:1101:4671:21702	Etheostoma	172	genus	95.12	4		Etheostoma	909693	54318	genus	Etheostoma	8165	family	Percidae	8111	order	Perciformes	186623	class	Actinopteri	7711	phylum	Chordata
C26T3:1:1102:14262:1459	Etheostoma	172	genus	95.4583	68		Etheostoma	909693	54318	genus	Etheostoma	8165	family	Percidae	8111	order	Perciformes	186623	class	Actinopteri	7711	phylum	Chordata
C26T3:1:1102:29039:9302	Etheostoma	172	genus	95.4583	56		Etheostoma	909693	54318	genus	Etheostoma	8165	family	Percidae	8111	order	Perciformes	186623	class	Actinopteri	7711	phylum	Chordata
C26T3:1:1102:7137:4637	Etheostoma	172	genus	97.125	4		Etheostoma	909693	54318	genus	Etheostoma	8165	family	Percidae	8111	order	Perciformes	186623	class	Actinopteri	7711	phylum	Chordata
C26T3:1:1103:10530:7108	Etheostoma	172	genus	95.4583	57		Etheostoma	909693	54318	genus	Etheostoma	8165	family	Percidae	8111	order	Perciformes	186623	class	Actinopteri	7711	phylum	Chordata
C26T3:1:1104:18264:6176	Etheostoma	172	genus	95.36	9		Etheostoma	909693	54318	genus	Etheostoma	8165	family	Percidae	8111	order	Perciformes	186623	class	Actinopteri	7711	phylum	Chordata
C26T3:1:1105:16448:12594	Etheostoma	172	genus	95.5882	5		Etheostoma	909693	54318	genus	Etheostoma	8165	family	Percidae	8111	order	Perciformes	186623	class	Actinopteri	7711	phylum	Chordata
C26T3:1:1105:9304:3926	Etheostoma	172	genus	95.4348	12		Etheostoma	909693	54318	genus	Etheostoma	8165	family	Percidae	8111	order	Perciformes	186623	class	Actinopteri	7711	phylum	Chordata
C26T3:1:1107:15935:4661	Etheostoma	172	genus	95.2083	2		Etheostoma	909693	54318	genus	Etheostoma	8165	family	Percidae	8111	order	Perciformes	186623	class	Actinopteri	7711	phylum	Chordata
C26T3:1:1107:6944:22244	Etheostoma	172	genus	96.625	49		Etheostoma	909693	54318	genus	Etheostoma	8165	family	Percidae	8111	order	Perciformes	186623	class	Actinopteri	7711	phylum	Chordata
C26T3:1:1109:10358:17853	Etheostoma	172	genus	95.12	4		Etheostoma	909693	54318	genus	Etheostoma	8165	family	Percidae	8111	order	Perciformes	186623	class	Actinopteri	7711	phylum	Chordata
C26T3:1:1109:3963:12701	Etheostoma	172	genus	95.12	2		Etheostoma	909693	54318	genus	Etheostoma	8165	family	Percidae	8111	order	Perciformes	186623	class	Actinopteri	7711	phylum	Chordata
C26T3:1:1110:7866:21374	Etheostoma	172	genus	95.2	4		Etheostoma	909693	54318	genus	Etheostoma	8165	family	Percidae	8111	order	Perciformes	186623	class	Actinopteri	7711	phylum	Chordata
C26T3:1:1113:24857:4555	Etheostoma	172	genus	95.36	3		Etheostoma	909693	54318	genus	Etheostoma	8165	family	Percidae	8111	order	Perciformes	186623	class	Actinopteri	7711	phylum	Chordata
C26T3:1:1114:8784:23744	Etheostoma	172	genus	96.2857	3		Etheostoma	909693	54318	genus	Etheostoma	8165	family	Percidae	8111	order	Perciformes	186623	class	Actinopteri	7711	phylum	Chordata
C26T3:1:1115:1933:12846	Etheostoma	172	genus	95.2	2		Etheostoma	909693	54318	genus	Etheostoma	8165	family	Percidae	8111	order	Perciformes	186623	class	Actinopteri	7711	phylum	Chordata
C26T3:1:2103:14762:8062	Etheostoma	172	genus	95.2222	2		Etheostoma	909693	54318	genus	Etheostoma	8165	family	Percidae	8111	order	Perciformes	186623	class	Actinopteri	7711	phylum	Chordata
C26T3:1:2105:28978:17225	Etheostoma	172	genus	95.16	3		Etheostoma	909693	54318	genus	Etheostoma	8165	family	Percidae	8111	order	Perciformes	186623	class	Actinopteri	7711	phylum	Chordata
C26T3:1:2106:24146:17480	Etheostoma	172	genus	95.2	6		Etheostoma	909693	54318	genus	Etheostoma	8165	family	Percidae	8111	order	Perciformes	186623	class	Actinopteri	7711	phylum	Chordata
C26T3:1:1101:24465:21500	Etheostoma	169	genus	95.8182	3		Etheostoma	909693	54318	genus	Etheostoma	8165	family	Percidae	8111	order	Perciformes	186623	class	Actinopteri	7711	phylum	Chordata
C26T3:1:1101:11180:20445	Etheostoma	167	genus	95.5333	4		Etheostoma	909693	54318	genus	Etheostoma	8165	family	Percidae	8111	order	Perciformes	186623	class	Actinopteri	7711	phylum	Chordata
C26T3:1:1101:14733:11911	Etheostoma	167	genus	95.5556	42		Etheostoma	909693	54318	genus	Etheostoma	8165	family	Percidae	8111	order	Perciformes	186623	class	Actinopteri	7711	phylum	Chordata
C26T3:1:1102:10584:4886	Etheostoma	167	genus	95.5714	10		Etheostoma	909693	54318	genus	Etheostoma	8165	family	Percidae	8111	order	Perciformes	186623	class	Actinopteri	7711	phylum	Chordata
C26T3:1:1102:26466:20406	Etheostoma	167	genus	95.4118	4		Etheostoma	909693	54318	genus	Etheostoma	8165	family	Percidae	8111	order	Perciformes	186623	class	Actinopteri	7711	phylum	Chordata
C26T3:1:1102:27631:10249	Etheostoma	167	genus	95.5556	2		Etheostoma	909693	54318	genus	Etheostoma	8165	family	Percidae	8111	order	Perciformes	186623	class	Actinopteri	7711	phylum	Chordata
C26T3:1:1103:15424:17315	Etheostoma	167	genus	95.3125	86		Etheostoma	909693	54318	genus	Etheostoma	8165	family	Percidae	8111	order	Perciformes	186623	class	Actinopteri	7711	phylum	Chordata
C26T3:1:1106:13929:12444	Etheostoma	167	genus	95.1905	3		Etheostoma	909693	54318	genus	Etheostoma	8165	family	Percidae	8111	order	Perciformes	186623	class	Actinopteri	7711	phylum	Chordata
C26T3:1:1107:5487:6548	Etheostoma	167	genus	95.4	6		Etheostoma	909693	54318	genus	Etheostoma	8165	family	Percidae	8111	order	Perciformes	186623	class	Actinopteri	7711	phylum	Chordata
C26T3:1:1108:5737:11769	Etheostoma	167	genus	95.7143	3		Etheostoma	909693	54318	genus	Etheostoma	8165	family	Percidae	8111	order	Perciformes	186623	class	Actinopteri	7711	phylum	Chordata
C26T3:1:1111:21990:4963	Etheostoma	167	genus	95.8182	2		Etheostoma	909693	54318	genus	Etheostoma	8165	family	Percidae	8111	order	Perciformes	186623	class	Actinopteri	7711	phylum	Chordata
C26T3:1:1115:20952:24333	Etheostoma	167	genus	95.4375	3		Etheostoma	909693	54318	genus	Etheostoma	8165	family	Percidae	8111	order	Perciformes	186623	class	Actinopteri	7711	phylum	Chordata
C26T3:1:1119:4988:14391	Etheostoma	167	genus	96.5	3		Etheostoma	909693	54318	genus	Etheostoma	8165	family	Percidae	8111	order	Perciformes	186623	class	Actinopteri	7711	phylum	Chordata
C26T3:1:2106:14597:14053	Etheostoma	167	genus	95.375	2		Etheostoma	909693	54318	genus	Etheostoma	8165	family	Percidae	8111	order	Perciformes	186623	class	Actinopteri	7711	phylum	Chordata
C26T3:1:2106:4744:16538	Etheostoma	167	genus	95.4286	2		Etheostoma	909693	54318	genus	Etheostoma	8165	family	Percidae	8111	order	Perciformes	186623	class	Actinopteri	7711	phylum	Chordata
C26T3:1:2116:16322:5932	Etheostoma	167	genus	95.625	9		Etheostoma	909693	54318	genus	Etheostoma	8165	family	Percidae	8111	order	Perciformes	186623	class	Actinopteri	7711	phylum	Chordata
C26T3:1:1110:16800:20948	Etheostoma	165	genus	95.6923	3		Etheostoma	909693	54318	genus	Etheostoma	8165	family	Percidae	8111	order	Perciformes	186623	class	Actinopteri	7711	phylum	Chordata
C26T3:1:1101:10923:14143	Etheostoma	163	genus	95.619	529		Etheostoma	909693	54318	genus	Etheostoma	8165	family	Percidae	8111	order	Perciformes	186623	class	Actinopteri	7711	phylum	Chordata
C26T3:1:1101:12525:4034	Etheostoma	163	genus	96.48	65		Etheostoma	909693	54318	genus	Etheostoma	8165	family	Percidae	8111	order	Perciformes	186623	class	Actinopteri	7711	phylum	Chordata
C26T3:1:1101:19363:5904	Etheostoma	163	genus	95.0714	16		Etheostoma	909693	54318	genus	Etheostoma	8165	family	Percidae	8111	order	Perciformes	186623	class	Actinopteri	7711	phylum	Chordata
C26T3:1:1101:21278:11308	Etheostoma	163	genus	95.8182	130		Etheostoma	909693	54318	genus	Etheostoma	8165	family	Percidae	8111	order	Perciformes	186623	class	Actinopteri	7711	phylum	Chordata
C26T3:1:1101:4805:4643	Etheostoma	163	genus	96.4167	32		Etheostoma	909693	54318	genus	Etheostoma	8165	family	Percidae	8111	order	Perciformes	186623	class	Actinopteri	7711	phylum	Chordata
C26T3:1:1102:14723:22774	Etheostoma	163	genus	96.4286	14		Etheostoma	909693	54318	genus	Etheostoma	8165	family	Percidae	8111	order	Perciformes	186623	class	Actinopteri	7711	phylum	Chordata
C26T3:1:1102:22669:2568	Etheostoma	163	genus	95.4783	2		Etheostoma	909693	54318	genus	Etheostoma	8165	family	Percidae	8111	order	Perciformes	186623	class	Actinopteri	7711	phylum	Chordata
C26T3:1:1102:28746:13289	Etheostoma	163	genus	95.3	4		Etheostoma	909693	54318	genus	Etheostoma	8165	family	Percidae	8111	order	Perciformes	186623	class	Actinopteri	7711	phylum	Chordata
C26T3:1:1104:27595:10822	Etheostoma	163	genus	95.7778	38		Etheostoma	909693	54318	genus	Etheostoma	8165	family	Percidae	8111	order	Perciformes	186623	class	Actinopteri	7711	phylum	Chordata
C26T3:1:1106:26493:6085	Etheostoma	163	genus	95.5	2		Etheostoma	909693	54318	genus	Etheostoma	8165	family	Percidae	8111	order	Perciformes	186623	class	Actinopteri	7711	phylum	Chordata
C26T3:1:1107:15471:22546	Etheostoma	163	genus	95.619	2		Etheostoma	909693	54318	genus	Etheostoma	8165	family	Percidae	8111	order	Perciformes	186623	class	Actinopteri	7711	phylum	Chordata
C26T3:1:1108:24076:8403	Etheostoma	163	genus	95.92	10		Etheostoma	909693	54318	genus	Etheostoma	8165	family	Percidae	8111	order	Perciformes	186623	class	Actinopteri	7711	phylum	Chordata
C26T3:1:1111:21252:16055	Etheostoma	163	genus	95.619	2		Etheostoma	909693	54318	genus	Etheostoma	8165	family	Percidae	8111	order	Perciformes	186623	class	Actinopteri	7711	phylum	Chordata
C26T3:1:1112:14350:15265	Etheostoma	163	genus	95.5217	3		Etheostoma	909693	54318	genus	Etheostoma	8165	family	Percidae	8111	order	Perciformes	186623	class	Actinopteri	7711	phylum	Chordata
C26T3:1:1113:15702:18733	Etheostoma	163	genus	95.619	3		Etheostoma	909693	54318	genus	Etheostoma	8165	family	Percidae	8111	order	Perciformes	186623	class	Actinopteri	7711	phylum	Chordata
C26T3:1:1113:26927:7995	Etheostoma	163	genus	95.125	2		Etheostoma	909693	54318	genus	Etheostoma	8165	family	Percidae	8111	order	Perciformes	186623	class	Actinopteri	7711	phylum	Chordata
C26T3:1:1115:25975:14251	Etheostoma	163	genus	95.2174	3		Etheostoma	909693	54318	genus	Etheostoma	8165	family	Percidae	8111	order	Perciformes	186623	class	Actinopteri	7711	phylum	Chordata
C26T3:1:1117:20765:4992	Etheostoma	163	genus	95.0417	2		Etheostoma	909693	54318	genus	Etheostoma	8165	family	Percidae	8111	order	Perciformes	186623	class	Actinopteri	7711	phylum	Chordata
C26T3:1:2101:25631:14490	Etheostoma	163	genus	95.6875	6		Etheostoma	909693	54318	genus	Etheostoma	8165	family	Percidae	8111	order	Perciformes	186623	class	Actinopteri	7711	phylum	Chordata
C26T3:1:2103:21420:13712	Etheostoma	163	genus	96.1053	3		Etheostoma	909693	54318	genus	Etheostoma	8165	family	Percidae	8111	order	Perciformes	186623	class	Actinopteri	7711	phylum	Chordata
C26T3:1:2103:7556:17454	Etheostoma	163	genus	96.3333	2		Etheostoma	909693	54318	genus	Etheostoma	8165	family	Percidae	8111	order	Perciformes	186623	class	Actinopteri	7711	phylum	Chordata
C26T3:1:2105:18990:2733	Etheostoma	163	genus	95	2		Etheostoma	909693	54318	genus	Etheostoma	8165	family	Percidae	8111	order	Perciformes	186623	class	Actinopteri	7711	phylum	Chordata
C26T3:1:2108:15436:24276	Etheostoma	163	genus	95.7273	16		Etheostoma	909693	54318	genus	Etheostoma	8165	family	Percidae	8111	order	Perciformes	186623	class	Actinopteri	7711	phylum	Chordata
C26T3:1:2112:24475:24112	Etheostoma	163	genus	95.2632	15		Etheostoma	909693	54318	genus	Etheostoma	8165	family	Percidae	8111	order	Perciformes	186623	class	Actinopteri	7711	phylum	Chordata
C26T3:1:1101:10216:1390	Etheostoma	161	genus	96.4583	101		Etheostoma	909693	54318	genus	Etheostoma	8165	family	Percidae	8111	order	Perciformes	186623	class	Actinopteri	7711	phylum	Chordata
C26T3:1:1101:12825:10050	Etheostoma	161	genus	95.8182	298		Etheostoma	909693	54318	genus	Etheostoma	8165	family	Percidae	8111	order	Perciformes	186623	class	Actinopteri	7711	phylum	Chordata
C26T3:1:1101:19782:1547	Etheostoma	161	genus	95.5	3		Etheostoma	909693	54318	genus	Etheostoma	8165	family	Percidae	8111	order	Perciformes	186623	class	Actinopteri	7711	phylum	Chordata
C26T3:1:1101:9370:17616	Etheostoma	161	genus	95.8182	8		Etheostoma	909693	54318	genus	Etheostoma	8165	family	Percidae	8111	order	Perciformes	186623	class	Actinopteri	7711	phylum	Chordata
C26T3:1:1102:11680:5401	Etheostoma	161	genus	95.2727	5		Etheostoma	909693	54318	genus	Etheostoma	8165	family	Percidae	8111	order	Perciformes	186623	class	Actinopteri	7711	phylum	Chordata
C26T3:1:1102:7609:15829	Etheostoma	161	genus	95	55		Etheostoma	909693	54318	genus	Etheostoma	8165	family	Percidae	8111	order	Perciformes	186623	class	Actinopteri	7711	phylum	Chordata
C26T3:1:1103:14359:11139	Etheostoma	161	genus	95.92	97		Etheostoma	909693	54318	genus	Etheostoma	8165	family	Percidae	8111	order	Perciformes	186623	class	Actinopteri	7711	phylum	Chordata
C26T3:1:1107:15498:19112	Etheostoma	161	genus	95	2		Etheostoma	909693	54318	genus	Etheostoma	8165	family	Percidae	8111	order	Perciformes	186623	class	Actinopteri	7711	phylum	Chordata
C26T3:1:1110:7296:3912	Etheostoma	161	genus	95	5		Etheostoma	909693	54318	genus	Etheostoma	8165	family	Percidae	8111	order	Perciformes	186623	class	Actinopteri	7711	phylum	Chordata
C26T3:1:1112:12615:3330	Etheostoma	161	genus	95	2		Etheostoma	909693	54318	genus	Etheostoma	8165	family	Percidae	8111	order	Perciformes	186623	class	Actinopteri	7711	phylum	Chordata
C26T3:1:1112:5056:17522	Etheostoma	161	genus	95.7619	17		Etheostoma	909693	54318	genus	Etheostoma	8165	family	Percidae	8111	order	Perciformes	186623	class	Actinopteri	7711	phylum	Chordata
C26T3:1:1115:6513:23218	Etheostoma	161	genus	95.1667	2		Etheostoma	909693	54318	genus	Etheostoma	8165	family	Percidae	8111	order	Perciformes	186623	class	Actinopteri	7711	phylum	Chordata
C26T3:1:1119:12595:8618	Etheostoma	161	genus	96.36	2		Etheostoma	909693	54318	genus	Etheostoma	8165	family	Percidae	8111	order	Perciformes	186623	class	Actinopteri	7711	phylum	Chordata
C26T3:1:2101:14464:20166	Etheostoma	161	genus	95.6923	37		Etheostoma	909693	54318	genus	Etheostoma	8165	family	Percidae	8111	order	Perciformes	186623	class	Actinopteri	7711	phylum	Chordata
C26T3:1:2101:4001:14933	Etheostoma	161	genus	95.0714	2		Etheostoma	909693	54318	genus	Etheostoma	8165	family	Percidae	8111	order	Perciformes	186623	class	Actinopteri	7711	phylum	Chordata
C26T3:1:2105:19543:24809	Etheostoma	161	genus	95	2		Etheostoma	909693	54318	genus	Etheostoma	8165	family	Percidae	8111	order	Perciformes	186623	class	Actinopteri	7711	phylum	Chordata
C26T3:1:2105:7893:13307	Etheostoma	161	genus	95.4615	5		Etheostoma	909693	54318	genus	Etheostoma	8165	family	Percidae	8111	order	Perciformes	186623	class	Actinopteri	7711	phylum	Chordata
C26T3:1:2106:5003:11489	Etheostoma	161	genus	96.3333	2		Etheostoma	909693	54318	genus	Etheostoma	8165	family	Percidae	8111	order	Perciformes	186623	class	Actinopteri	7711	phylum	Chordata
C26T3:1:1104:9798:16379	Etheostoma	159	genus	95.2941	2		Etheostoma	909693	54318	genus	Etheostoma	8165	family	Percidae	8111	order	Perciformes	186623	class	Actinopteri	7711	phylum	Chordata
C26T3:1:1105:13642:17117	Etheostoma	159	genus	96.1765	2		Etheostoma	909693	54318	genus	Etheostoma	8165	family	Percidae	8111	order	Perciformes	186623	class	Actinopteri	7711	phylum	Chordata
C26T3:1:1101:27058:12019	Etheostoma	158	genus	95.0625	18		Etheostoma	909693	54318	genus	Etheostoma	8165	family	Percidae	8111	order	Perciformes	186623	class	Actinopteri	7711	phylum	Chordata
C26T3:1:1104:14684:15597	Etheostoma	158	genus	95.1905	2		Etheostoma	909693	54318	genus	Etheostoma	8165	family	Percidae	8111	order	Perciformes	186623	class	Actinopteri	7711	phylum	Chordata
C26T3:1:1105:12865:5442	Etheostoma	158	genus	95.6429	10		Etheostoma	909693	54318	genus	Etheostoma	8165	family	Percidae	8111	order	Perciformes	186623	class	Actinopteri	7711	phylum	Chordata
C26T3:1:1106:16298:13898	Etheostoma	158	genus	95.2083	7		Etheostoma	909693	54318	genus	Etheostoma	8165	family	Percidae	8111	order	Perciformes	186623	class	Actinopteri	7711	phylum	Chordata
C26T3:1:1111:12509:7202	Etheostoma	158	genus	95.2	6		Etheostoma	909693	54318	genus	Etheostoma	8165	family	Percidae	8111	order	Perciformes	186623	class	Actinopteri	7711	phylum	Chordata
C26T3:1:1112:25534:13588	Etheostoma	158	genus	95.2	2		Etheostoma	909693	54318	genus	Etheostoma	8165	family	Percidae	8111	order	Perciformes	186623	class	Actinopteri	7711	phylum	Chordata
C26T3:1:1115:12726:4296	Etheostoma	158	genus	95.3571	2		Etheostoma	909693	54318	genus	Etheostoma	8165	family	Percidae	8111	order	Perciformes	186623	class	Actinopteri	7711	phylum	Chordata
C26T3:1:1116:21427:18311	Etheostoma	158	genus	96	2		Etheostoma	909693	54318	genus	Etheostoma	8165	family	Percidae	8111	order	Perciformes	186623	class	Actinopteri	7711	phylum	Chordata
C26T3:1:1117:11847:18287	Etheostoma	158	genus	95.1667	3		Etheostoma	909693	54318	genus	Etheostoma	8165	family	Percidae	8111	order	Perciformes	186623	class	Actinopteri	7711	phylum	Chordata
C26T3:1:1117:19657:15413	Etheostoma	158	genus	95.3333	3		Etheostoma	909693	54318	genus	Etheostoma	8165	family	Percidae	8111	order	Perciformes	186623	class	Actinopteri	7711	phylum	Chordata
C26T3:1:1119:23788:19276	Etheostoma	158	genus	96	64		Etheostoma	909693	54318	genus	Etheostoma	8165	family	Percidae	8111	order	Perciformes	186623	class	Actinopteri	7711	phylum	Chordata
C26T3:1:2103:24290:11680	Etheostoma	158	genus	95.5714	2		Etheostoma	909693	54318	genus	Etheostoma	8165	family	Percidae	8111	order	Perciformes	186623	class	Actinopteri	7711	phylum	Chordata
C26T3:1:2107:13572:8749	Etheostoma	158	genus	97.3333	2		Etheostoma	909693	54318	genus	Etheostoma	8165	family	Percidae	8111	order	Perciformes	186623	class	Actinopteri	7711	phylum	Chordata
C26T3:1:2109:12838:17358	Etheostoma	158	genus	95	2		Etheostoma	909693	54318	genus	Etheostoma	8165	family	Percidae	8111	order	Perciformes	186623	class	Actinopteri	7711	phylum	Chordata
C26T3:1:2109:19904:11520	Etheostoma	158	genus	95.3571	2		Etheostoma	909693	54318	genus	Etheostoma	8165	family	Percidae	8111	order	Perciformes	186623	class	Actinopteri	7711	phylum	Chordata
C26T3:1:1101:14089:4573	Etheostoma	156	genus	95.9524	10		Etheostoma	909693	54318	genus	Etheostoma	8165	family	Percidae	8111	order	Perciformes	186623	class	Actinopteri	7711	phylum	Chordata
C26T3:1:1101:22281:7049	Etheostoma	156	genus	95.5714	3		Etheostoma	909693	54318	genus	Etheostoma	8165	family	Percidae	8111	order	Perciformes	186623	class	Actinopteri	7711	phylum	Chordata
C26T3:1:1101:3746:12695	Etheostoma	156	genus	95.9565	18		Etheostoma	909693	54318	genus	Etheostoma	8165	family	Percidae	8111	order	Perciformes	186623	class	Actinopteri	7711	phylum	Chordata
C26T3:1:1102:19761:18536	Etheostoma	156	genus	95.1667	23		Etheostoma	909693	54318	genus	Etheostoma	8165	family	Percidae	8111	order	Perciformes	186623	class	Actinopteri	7711	phylum	Chordata
C26T3:1:1103:16889:11740	Etheostoma	156	genus	95.9565	11		Etheostoma	909693	54318	genus	Etheostoma	8165	family	Percidae	8111	order	Perciformes	186623	class	Actinopteri	7711	phylum	Chordata
C26T3:1:1109:24001:6979	Etheostoma	156	genus	95.4375	3		Etheostoma	909693	54318	genus	Etheostoma	8165	family	Percidae	8111	order	Perciformes	186623	class	Actinopteri	7711	phylum	Chordata
C26T3:1:1112:11940:10128	Etheostoma	156	genus	95.5	19		Etheostoma	909693	54318	genus	Etheostoma	8165	family	Percidae	8111	order	Perciformes	186623	class	Actinopteri	7711	phylum	Chordata
C26T3:1:1113:9742:3763	Etheostoma	156	genus	95.2	24		Etheostoma	909693	54318	genus	Etheostoma	8165	family	Percidae	8111	order	Perciformes	186623	class	Actinopteri	7711	phylum	Chordata
C26T3:1:1115:13477:19669	Etheostoma	156	genus	95.5	4		Etheostoma	909693	54318	genus	Etheostoma	8165	family	Percidae	8111	order	Perciformes	186623	class	Actinopteri	7711	phylum	Chordata
C26T3:1:2103:13986:2784	Etheostoma	156	genus	95.12	2		Etheostoma	909693	54318	genus	Etheostoma	8165	family	Percidae	8111	order	Perciformes	186623	class	Actinopteri	7711	phylum	Chordata
C26T3:1:2110:6867:4546	Etheostoma	156	genus	95.56	2		Etheostoma	909693	54318	genus	Etheostoma	8165	family	Percidae	8111	order	Perciformes	186623	class	Actinopteri	7711	phylum	Chordata
C26T3:1:2114:15649:9549	Etheostoma	156	genus	95	2		Etheostoma	909693	54318	genus	Etheostoma	8165	family	Percidae	8111	order	Perciformes	186623	class	Actinopteri	7711	phylum	Chordata
C26T3:1:1101:8307:13778	Etheostoma	154	genus	95.9565	51		Etheostoma	909693	54318	genus	Etheostoma	8165	family	Percidae	8111	order	Perciformes	186623	class	Actinopteri	7711	phylum	Chordata
C26T3:1:1114:15995:16112	Etheostoma	154	genus	95.913	6		Etheostoma	909693	54318	genus	Etheostoma	8165	family	Percidae	8111	order	Perciformes	186623	class	Actinopteri	7711	phylum	Chordata
C26T3:1:1103:7638:6888	Etheostoma	152	genus	95.4783	3		Etheostoma	909693	54318	genus	Etheostoma	8165	family	Percidae	8111	order	Perciformes	186623	class	Actinopteri	7711	phylum	Chordata
C26T3:1:1104:26341:6613	Etheostoma	152	genus	95.8	2		Etheostoma	909693	54318	genus	Etheostoma	8165	family	Percidae	8111	order	Perciformes	186623	class	Actinopteri	7711	phylum	Chordata
C26T3:1:1104:28040:8612	Etheostoma	152	genus	98	3		Etheostoma	909693	54318	genus	Etheostoma	8165	family	Percidae	8111	order	Perciformes	186623	class	Actinopteri	7711	phylum	Chordata
C26T3:1:1105:5601:20900	Etheostoma	152	genus	95.0769	2		Etheostoma	909693	54318	genus	Etheostoma	8165	family	Percidae	8111	order	Perciformes	186623	class	Actinopteri	7711	phylum	Chordata
C26T3:1:1106:19489:14587	Etheostoma	152	genus	95.1579	6		Etheostoma	909693	54318	genus	Etheostoma	8165	family	Percidae	8111	order	Perciformes	186623	class	Actinopteri	7711	phylum	Chordata
C26T3:1:2101:11391:10163	Etheostoma	152	genus	95.2941	2		Etheostoma	909693	54318	genus	Etheostoma	8165	family	Percidae	8111	order	Perciformes	186623	class	Actinopteri	7711	phylum	Chordata
C26T3:1:2106:22740:18486	Etheostoma	152	genus	95.6667	2		Etheostoma	909693	54318	genus	Etheostoma	8165	family	Percidae	8111	order	Perciformes	186623	class	Actinopteri	7711	phylum	Chordata
C26T3:1:1105:22214:24911	Etheostoma	150	genus	95.5	7		Etheostoma	909693	54318	genus	Etheostoma	8165	family	Percidae	8111	order	Perciformes	186623	class	Actinopteri	7711	phylum	Chordata
C26T3:1:1104:5533:7827	Gallus	167	genus	96	25		Gallus	9030	9030	genus	Gallus	9005	family	Phasianidae	8976	order	Galliformes	8782	class	Aves	7711	phylum	Chordata
C26T3:1:1104:24420:21531	Gallus	161	genus	95	7		Gallus	9030	9030	genus	Gallus	9005	family	Phasianidae	8976	order	Galliformes	8782	class	Aves	7711	phylum	Chordata
C26T3:1:2106:12437:15117	Gallus	161	genus	95	4		Gallus	9030	9030	genus	Gallus	9005	family	Phasianidae	8976	order	Galliformes	8782	class	Aves	7711	phylum	Chordata
C26T3:1:1101:21057:2384	Gallus	158	genus	95	13		Gallus	9030	9030	genus	Gallus	9005	family	Phasianidae	8976	order	Galliformes	8782	class	Aves	7711	phylum	Chordata
C26T3:1:1101:14434:20386	Gallus	154	genus	97	67		Gallus	9030	9030	genus	Gallus	9005	family	Phasianidae	8976	order	Galliformes	8782	class	Aves	7711	phylum	Chordata
C26T3:1:1106:20600:6227	Gallus	154	genus	97	11		Gallus	9030	9030	genus	Gallus	9005	family	Phasianidae	8976	order	Galliformes	8782	class	Aves	7711	phylum	Chordata
C26T3:1:1101:10801:5407	Gallus	152	genus	97	30		Gallus	9030	9030	genus	Gallus	9005	family	Phasianidae	8976	order	Galliformes	8782	class	Aves	7711	phylum	Chordata
C26T3:1:1106:7100:23996	Gyrinocheilus	193	genus	96.2	3		Gyrinocheilus	98398	98398	genus	Gyrinocheilus	30726	family	Gyrinocheilidae	7952	order	Cypriniformes	186623	class	Actinopteri	7711	phylum	Chordata
C26T3:1:1103:12480:12026	Gyrinocheilus	189	genus	95.2	10		Gyrinocheilus	98398	98398	genus	Gyrinocheilus	30726	family	Gyrinocheilidae	7952	order	Cypriniformes	186623	class	Actinopteri	7711	phylum	Chordata
C26T3:1:1103:14223:1732	Gyrinocheilus	189	genus	95.2	6		Gyrinocheilus	98398	98398	genus	Gyrinocheilus	30726	family	Gyrinocheilidae	7952	order	Cypriniformes	186623	class	Actinopteri	7711	phylum	Chordata
C26T3:1:1105:26822:10417	Gyrinocheilus	189	genus	95.2	2		Gyrinocheilus	98398	98398	genus	Gyrinocheilus	30726	family	Gyrinocheilidae	7952	order	Cypriniformes	186623	class	Actinopteri	7711	phylum	Chordata
C26T3:1:1117:17088:15265	Gyrinocheilus	182	genus	95.6	5		Gyrinocheilus	98398	98398	genus	Gyrinocheilus	30726	family	Gyrinocheilidae	7952	order	Cypriniformes	186623	class	Actinopteri	7711	phylum	Chordata
C26T3:1:1101:9449:20847	Gyrinocheilus	180	genus	95.2	3		Gyrinocheilus	98398	98398	genus	Gyrinocheilus	30726	family	Gyrinocheilidae	7952	order	Cypriniformes	186623	class	Actinopteri	7711	phylum	Chordata
C26T3:1:1101:18843:13270	Gyrinocheilus	172	genus	95.2	5		Gyrinocheilus	98398	98398	genus	Gyrinocheilus	30726	family	Gyrinocheilidae	7952	order	Cypriniformes	186623	class	Actinopteri	7711	phylum	Chordata
C26T3:1:1103:28560:8724	Gyrinocheilus	171	genus	95.2	4		Gyrinocheilus	98398	98398	genus	Gyrinocheilus	30726	family	Gyrinocheilidae	7952	order	Cypriniformes	186623	class	Actinopteri	7711	phylum	Chordata
C26T3:1:1106:6905:5661	Gyrinocheilus	169	genus	95.2	5		Gyrinocheilus	98398	98398	genus	Gyrinocheilus	30726	family	Gyrinocheilidae	7952	order	Cypriniformes	186623	class	Actinopteri	7711	phylum	Chordata
C26T3:1:1101:11730:24625	Gyrinocheilus	167	genus	96.2	315		Gyrinocheilus	98398	98398	genus	Gyrinocheilus	30726	family	Gyrinocheilidae	7952	order	Cypriniformes	186623	class	Actinopteri	7711	phylum	Chordata
C26T3:1:2105:18436:15186	Gyrinocheilus	167	genus	96	4		Gyrinocheilus	98398	98398	genus	Gyrinocheilus	30726	family	Gyrinocheilidae	7952	order	Cypriniformes	186623	class	Actinopteri	7711	phylum	Chordata
C26T3:1:1105:21492:23324	Gyrinocheilus	163	genus	95.2	519		Gyrinocheilus	98398	98398	genus	Gyrinocheilus	30726	family	Gyrinocheilidae	7952	order	Cypriniformes	186623	class	Actinopteri	7711	phylum	Chordata
C26T3:1:1106:24922:12868	Gyrinocheilus	161	genus	95.2	2		Gyrinocheilus	98398	98398	genus	Gyrinocheilus	30726	family	Gyrinocheilidae	7952	order	Cypriniformes	186623	class	Actinopteri	7711	phylum	Chordata
C26T3:1:1101:4715:9259	Gyrinocheilus	159	genus	95.2	58		Gyrinocheilus	98398	98398	genus	Gyrinocheilus	30726	family	Gyrinocheilidae	7952	order	Cypriniformes	186623	class	Actinopteri	7711	phylum	Chordata
C26T3:1:1102:10112:7977	Gyrinocheilus	159	genus	95.2	2		Gyrinocheilus	98398	98398	genus	Gyrinocheilus	30726	family	Gyrinocheilidae	7952	order	Cypriniformes	186623	class	Actinopteri	7711	phylum	Chordata
C26T3:1:1101:10342:24105	Gyrinocheilus	158	genus	95.2	12		Gyrinocheilus	98398	98398	genus	Gyrinocheilus	30726	family	Gyrinocheilidae	7952	order	Cypriniformes	186623	class	Actinopteri	7711	phylum	Chordata
C26T3:1:1108:13100:9276	Gyrinocheilus	158	genus	95.2	13		Gyrinocheilus	98398	98398	genus	Gyrinocheilus	30726	family	Gyrinocheilidae	7952	order	Cypriniformes	186623	class	Actinopteri	7711	phylum	Chordata
C26T3:1:1103:3001:11332	Gyrinocheilus	156	genus	95	6		Gyrinocheilus	98398	98398	genus	Gyrinocheilus	30726	family	Gyrinocheilidae	7952	order	Cypriniformes	186623	class	Actinopteri	7711	phylum	Chordata
C26T3:1:1106:16421:12343	Gyrinocheilus	156	genus	95	2		Gyrinocheilus	98398	98398	genus	Gyrinocheilus	30726	family	Gyrinocheilidae	7952	order	Cypriniformes	186623	class	Actinopteri	7711	phylum	Chordata
C26T3:1:2103:9889:23895	Gyrinocheilus	152	genus	95	2		Gyrinocheilus	98398	98398	genus	Gyrinocheilus	30726	family	Gyrinocheilidae	7952	order	Cypriniformes	186623	class	Actinopteri	7711	phylum	Chordata
C26T3:1:1111:14668:24999	Gyrinophilus	161	genus	99.08	2		Gyrinophilus	134759	134759	genus	Gyrinophilus	8332	family	Plethodontidae	8293	order	Caudata	8292	class	Amphibia	7711	phylum	Chordata
C26T3:1:1104:3608:13015	Gyrinophilus	152	genus	98.08	10		Gyrinophilus	134759	134759	genus	Gyrinophilus	8332	family	Plethodontidae	8293	order	Caudata	8292	class	Amphibia	7711	phylum	Chordata
C26T3:1:1103:15169:6274	Hybopsis	169	genus	96.3333	21		Hybopsis	87727	87727	genus	Hybopsis	7953	family	Cyprinidae	7952	order	Cypriniformes	186623	class	Actinopteri	7711	phylum	Chordata
C26T3:1:1106:15562:3499	Hybopsis	169	genus	96.3333	9		Hybopsis	87727	87727	genus	Hybopsis	7953	family	Cyprinidae	7952	order	Cypriniformes	186623	class	Actinopteri	7711	phylum	Chordata
C26T3:1:1106:3075:10284	Hybopsis	169	genus	96.3333	2		Hybopsis	87727	87727	genus	Hybopsis	7953	family	Cyprinidae	7952	order	Cypriniformes	186623	class	Actinopteri	7711	phylum	Chordata
C26T3:1:2102:6521:23647	Hybopsis	169	genus	96.3333	3		Hybopsis	87727	87727	genus	Hybopsis	7953	family	Cyprinidae	7952	order	Cypriniformes	186623	class	Actinopteri	7711	phylum	Chordata
C26T3:1:2108:27127:14644	Hybopsis	169	genus	96.3333	3		Hybopsis	87727	87727	genus	Hybopsis	7953	family	Cyprinidae	7952	order	Cypriniformes	186623	class	Actinopteri	7711	phylum	Chordata
C26T3:1:2110:15941:20974	Hybopsis	167	genus	95.3333	62		Hybopsis	87727	87727	genus	Hybopsis	7953	family	Cyprinidae	7952	order	Cypriniformes	186623	class	Actinopteri	7711	phylum	Chordata
C26T3:1:1105:20235:13835	Hybopsis	163	genus	95.3333	8		Hybopsis	87727	87727	genus	Hybopsis	7953	family	Cyprinidae	7952	order	Cypriniformes	186623	class	Actinopteri	7711	phylum	Chordata
C26T3:1:1106:21570:23244	Hybopsis	163	genus	95.3333	7		Hybopsis	87727	87727	genus	Hybopsis	7953	family	Cyprinidae	7952	order	Cypriniformes	186623	class	Actinopteri	7711	phylum	Chordata
C26T3:1:1108:21194:8900	Hybopsis	163	genus	96	2		Hybopsis	87727	87727	genus	Hybopsis	7953	family	Cyprinidae	7952	order	Cypriniformes	186623	class	Actinopteri	7711	phylum	Chordata
C26T3:1:1108:22103:20236	Hybopsis	163	genus	95.3333	6		Hybopsis	87727	87727	genus	Hybopsis	7953	family	Cyprinidae	7952	order	Cypriniformes	186623	class	Actinopteri	7711	phylum	Chordata
C26T3:1:1110:17576:16347	Hybopsis	163	genus	95.3333	9		Hybopsis	87727	87727	genus	Hybopsis	7953	family	Cyprinidae	7952	order	Cypriniformes	186623	class	Actinopteri	7711	phylum	Chordata
C26T3:1:1110:19552:23424	Hybopsis	163	genus	95.3333	2		Hybopsis	87727	87727	genus	Hybopsis	7953	family	Cyprinidae	7952	order	Cypriniformes	186623	class	Actinopteri	7711	phylum	Chordata
C26T3:1:1116:12356:5747	Hybopsis	163	genus	95.3333	3		Hybopsis	87727	87727	genus	Hybopsis	7953	family	Cyprinidae	7952	order	Cypriniformes	186623	class	Actinopteri	7711	phylum	Chordata
C26T3:1:1102:22043:24388	Hybopsis	159	genus	95.3333	2		Hybopsis	87727	87727	genus	Hybopsis	7953	family	Cyprinidae	7952	order	Cypriniformes	186623	class	Actinopteri	7711	phylum	Chordata
C26T3:1:2108:16291:15430	Hybopsis	156	genus	95	2		Hybopsis	87727	87727	genus	Hybopsis	7953	family	Cyprinidae	7952	order	Cypriniformes	186623	class	Actinopteri	7711	phylum	Chordata
C26T3:1:1107:24302:21184	Hypentelium	189	genus	96	6		Hypentelium	61315	61315	genus	Hypentelium	7968	family	Catostomidae	7952	order	Cypriniformes	186623	class	Actinopteri	7711	phylum	Chordata
C26T3:1:1113:11548:10265	Hypentelium	189	genus	96	2		Hypentelium	61315	61315	genus	Hypentelium	7968	family	Catostomidae	7952	order	Cypriniformes	186623	class	Actinopteri	7711	phylum	Chordata
C26T3:1:2107:16466:12520	Hypentelium	189	genus	96	2		Hypentelium	61315	61315	genus	Hypentelium	7968	family	Catostomidae	7952	order	Cypriniformes	186623	class	Actinopteri	7711	phylum	Chordata
C26T3:1:1101:20635:5594	Hypentelium	182	genus	95	3		Hypentelium	61315	61315	genus	Hypentelium	7968	family	Catostomidae	7952	order	Cypriniformes	186623	class	Actinopteri	7711	phylum	Chordata
C26T3:1:1101:21561:21662	Hypentelium	182	genus	95	6		Hypentelium	61315	61315	genus	Hypentelium	7968	family	Catostomidae	7952	order	Cypriniformes	186623	class	Actinopteri	7711	phylum	Chordata
C26T3:1:1104:11393:16673	Hypentelium	182	genus	95	9		Hypentelium	61315	61315	genus	Hypentelium	7968	family	Catostomidae	7952	order	Cypriniformes	186623	class	Actinopteri	7711	phylum	Chordata
C26T3:1:2102:29029:9663	Hypentelium	182	genus	95	2		Hypentelium	61315	61315	genus	Hypentelium	7968	family	Catostomidae	7952	order	Cypriniformes	186623	class	Actinopteri	7711	phylum	Chordata
C26T3:1:1102:10770:22048	Hypentelium	180	genus	96	3		Hypentelium	61315	61315	genus	Hypentelium	7968	family	Catostomidae	7952	order	Cypriniformes	186623	class	Actinopteri	7711	phylum	Chordata
C26T3:1:1103:2523:10723	Hypentelium	180	genus	96	4		Hypentelium	61315	61315	genus	Hypentelium	7968	family	Catostomidae	7952	order	Cypriniformes	186623	class	Actinopteri	7711	phylum	Chordata
C26T3:1:1106:6280:23111	Hypentelium	169	genus	95	2		Hypentelium	61315	61315	genus	Hypentelium	7968	family	Catostomidae	7952	order	Cypriniformes	186623	class	Actinopteri	7711	phylum	Chordata
C26T3:1:1103:14616:13104	Hypentelium	167	genus	96	2		Hypentelium	61315	61315	genus	Hypentelium	7968	family	Catostomidae	7952	order	Cypriniformes	186623	class	Actinopteri	7711	phylum	Chordata
C26T3:1:1107:20581:2087	Hypentelium	167	genus	96	2		Hypentelium	61315	61315	genus	Hypentelium	7968	family	Catostomidae	7952	order	Cypriniformes	186623	class	Actinopteri	7711	phylum	Chordata
C26T3:1:1118:11313:21155	Hypentelium	167	genus	96	2		Hypentelium	61315	61315	genus	Hypentelium	7968	family	Catostomidae	7952	order	Cypriniformes	186623	class	Actinopteri	7711	phylum	Chordata
C26T3:1:1113:10491:1914	Hypentelium	165	genus	95	2		Hypentelium	61315	61315	genus	Hypentelium	7968	family	Catostomidae	7952	order	Cypriniformes	186623	class	Actinopteri	7711	phylum	Chordata
C26T3:1:2109:8213:10155	Hypentelium	165	genus	95	2		Hypentelium	61315	61315	genus	Hypentelium	7968	family	Catostomidae	7952	order	Cypriniformes	186623	class	Actinopteri	7711	phylum	Chordata
C26T3:1:1101:10161:19708	Hypentelium	163	genus	98	20		Hypentelium	61315	61315	genus	Hypentelium	7968	family	Catostomidae	7952	order	Cypriniformes	186623	class	Actinopteri	7711	phylum	Chordata
C26T3:1:1101:10974:10790	Hypentelium	163	genus	98	9		Hypentelium	61315	61315	genus	Hypentelium	7968	family	Catostomidae	7952	order	Cypriniformes	186623	class	Actinopteri	7711	phylum	Chordata
C26T3:1:1101:12153:13360	Hypentelium	163	genus	98	571		Hypentelium	61315	61315	genus	Hypentelium	7968	family	Catostomidae	7952	order	Cypriniformes	186623	class	Actinopteri	7711	phylum	Chordata
C26T3:1:1101:12508:5871	Hypentelium	163	genus	98	9		Hypentelium	61315	61315	genus	Hypentelium	7968	family	Catostomidae	7952	order	Cypriniformes	186623	class	Actinopteri	7711	phylum	Chordata
C26T3:1:1101:12979:14754	Hypentelium	163	genus	100	164		Hypentelium	61315	61315	genus	Hypentelium	7968	family	Catostomidae	7952	order	Cypriniformes	186623	class	Actinopteri	7711	phylum	Chordata
C26T3:1:1101:13021:2233	Hypentelium	163	genus	98	10		Hypentelium	61315	61315	genus	Hypentelium	7968	family	Catostomidae	7952	order	Cypriniformes	186623	class	Actinopteri	7711	phylum	Chordata
C26T3:1:1101:13464:11766	Hypentelium	163	genus	98	2		Hypentelium	61315	61315	genus	Hypentelium	7968	family	Catostomidae	7952	order	Cypriniformes	186623	class	Actinopteri	7711	phylum	Chordata
C26T3:1:1101:14398:6437	Hypentelium	163	genus	98	46		Hypentelium	61315	61315	genus	Hypentelium	7968	family	Catostomidae	7952	order	Cypriniformes	186623	class	Actinopteri	7711	phylum	Chordata
C26T3:1:1101:14895:13389	Hypentelium	163	genus	98	23		Hypentelium	61315	61315	genus	Hypentelium	7968	family	Catostomidae	7952	order	Cypriniformes	186623	class	Actinopteri	7711	phylum	Chordata
C26T3:1:1101:15979:3458	Hypentelium	163	genus	100	106		Hypentelium	61315	61315	genus	Hypentelium	7968	family	Catostomidae	7952	order	Cypriniformes	186623	class	Actinopteri	7711	phylum	Chordata
C26T3:1:1101:17986:5919	Hypentelium	163	genus	98	19		Hypentelium	61315	61315	genus	Hypentelium	7968	family	Catostomidae	7952	order	Cypriniformes	186623	class	Actinopteri	7711	phylum	Chordata
C26T3:1:1101:19317:8211	Hypentelium	163	genus	98	29		Hypentelium	61315	61315	genus	Hypentelium	7968	family	Catostomidae	7952	order	Cypriniformes	186623	class	Actinopteri	7711	phylum	Chordata
C26T3:1:1101:20085:9622	Hypentelium	163	genus	98	9		Hypentelium	61315	61315	genus	Hypentelium	7968	family	Catostomidae	7952	order	Cypriniformes	186623	class	Actinopteri	7711	phylum	Chordata
C26T3:1:1101:21315:19354	Hypentelium	163	genus	98	16		Hypentelium	61315	61315	genus	Hypentelium	7968	family	Catostomidae	7952	order	Cypriniformes	186623	class	Actinopteri	7711	phylum	Chordata
C26T3:1:1101:21391:17787	Hypentelium	163	genus	98	13		Hypentelium	61315	61315	genus	Hypentelium	7968	family	Catostomidae	7952	order	Cypriniformes	186623	class	Actinopteri	7711	phylum	Chordata
C26T3:1:1101:21404:22911	Hypentelium	163	genus	98	30		Hypentelium	61315	61315	genus	Hypentelium	7968	family	Catostomidae	7952	order	Cypriniformes	186623	class	Actinopteri	7711	phylum	Chordata
C26T3:1:1101:21497:12970	Hypentelium	163	genus	100	12		Hypentelium	61315	61315	genus	Hypentelium	7968	family	Catostomidae	7952	order	Cypriniformes	186623	class	Actinopteri	7711	phylum	Chordata
C26T3:1:1101:22493:22413	Hypentelium	163	genus	98	14		Hypentelium	61315	61315	genus	Hypentelium	7968	family	Catostomidae	7952	order	Cypriniformes	186623	class	Actinopteri	7711	phylum	Chordata
C26T3:1:1101:22791:18437	Hypentelium	163	genus	98	23		Hypentelium	61315	61315	genus	Hypentelium	7968	family	Catostomidae	7952	order	Cypriniformes	186623	class	Actinopteri	7711	phylum	Chordata
C26T3:1:1101:23708:24440	Hypentelium	163	genus	98	23		Hypentelium	61315	61315	genus	Hypentelium	7968	family	Catostomidae	7952	order	Cypriniformes	186623	class	Actinopteri	7711	phylum	Chordata
C26T3:1:1101:23738:16533	Hypentelium	163	genus	98	14		Hypentelium	61315	61315	genus	Hypentelium	7968	family	Catostomidae	7952	order	Cypriniformes	186623	class	Actinopteri	7711	phylum	Chordata
C26T3:1:1101:24155:16550	Hypentelium	163	genus	98	6		Hypentelium	61315	61315	genus	Hypentelium	7968	family	Catostomidae	7952	order	Cypriniformes	186623	class	Actinopteri	7711	phylum	Chordata
C26T3:1:1101:28513:14379	Hypentelium	163	genus	98	7		Hypentelium	61315	61315	genus	Hypentelium	7968	family	Catostomidae	7952	order	Cypriniformes	186623	class	Actinopteri	7711	phylum	Chordata
C26T3:1:1101:3165:12656	Hypentelium	163	genus	98	15		Hypentelium	61315	61315	genus	Hypentelium	7968	family	Catostomidae	7952	order	Cypriniformes	186623	class	Actinopteri	7711	phylum	Chordata
C26T3:1:1101:5882:19341	Hypentelium	163	genus	98	15		Hypentelium	61315	61315	genus	Hypentelium	7968	family	Catostomidae	7952	order	Cypriniformes	186623	class	Actinopteri	7711	phylum	Chordata
C26T3:1:1101:7726:10152	Hypentelium	163	genus	98	4		Hypentelium	61315	61315	genus	Hypentelium	7968	family	Catostomidae	7952	order	Cypriniformes	186623	class	Actinopteri	7711	phylum	Chordata
C26T3:1:1101:8272:11181	Hypentelium	163	genus	98	9		Hypentelium	61315	61315	genus	Hypentelium	7968	family	Catostomidae	7952	order	Cypriniformes	186623	class	Actinopteri	7711	phylum	Chordata
C26T3:1:1101:9422:4294	Hypentelium	163	genus	98	26		Hypentelium	61315	61315	genus	Hypentelium	7968	family	Catostomidae	7952	order	Cypriniformes	186623	class	Actinopteri	7711	phylum	Chordata
C26T3:1:1102:13549:2345	Hypentelium	163	genus	98	6		Hypentelium	61315	61315	genus	Hypentelium	7968	family	Catostomidae	7952	order	Cypriniformes	186623	class	Actinopteri	7711	phylum	Chordata
C26T3:1:1102:15020:1083	Hypentelium	163	genus	98	10		Hypentelium	61315	61315	genus	Hypentelium	7968	family	Catostomidae	7952	order	Cypriniformes	186623	class	Actinopteri	7711	phylum	Chordata
C26T3:1:1102:15706:2462	Hypentelium	163	genus	98	20		Hypentelium	61315	61315	genus	Hypentelium	7968	family	Catostomidae	7952	order	Cypriniformes	186623	class	Actinopteri	7711	phylum	Chordata
C26T3:1:1102:15941:13967	Hypentelium	163	genus	98	7		Hypentelium	61315	61315	genus	Hypentelium	7968	family	Catostomidae	7952	order	Cypriniformes	186623	class	Actinopteri	7711	phylum	Chordata
C26T3:1:1102:17781:5402	Hypentelium	163	genus	98	3		Hypentelium	61315	61315	genus	Hypentelium	7968	family	Catostomidae	7952	order	Cypriniformes	186623	class	Actinopteri	7711	phylum	Chordata
C26T3:1:1102:23056:15804	Hypentelium	163	genus	98	21		Hypentelium	61315	61315	genus	Hypentelium	7968	family	Catostomidae	7952	order	Cypriniformes	186623	class	Actinopteri	7711	phylum	Chordata
C26T3:1:1102:23122:24860	Hypentelium	163	genus	97	5		Hypentelium	61315	61315	genus	Hypentelium	7968	family	Catostomidae	7952	order	Cypriniformes	186623	class	Actinopteri	7711	phylum	Chordata
C26T3:1:1102:23432:11258	Hypentelium	163	genus	98	18		Hypentelium	61315	61315	genus	Hypentelium	7968	family	Catostomidae	7952	order	Cypriniformes	186623	class	Actinopteri	7711	phylum	Chordata
C26T3:1:1102:23554:11986	Hypentelium	163	genus	98	17		Hypentelium	61315	61315	genus	Hypentelium	7968	family	Catostomidae	7952	order	Cypriniformes	186623	class	Actinopteri	7711	phylum	Chordata
C26T3:1:1102:26548:7776	Hypentelium	163	genus	98	5		Hypentelium	61315	61315	genus	Hypentelium	7968	family	Catostomidae	7952	order	Cypriniformes	186623	class	Actinopteri	7711	phylum	Chordata
C26T3:1:1102:26950:17075	Hypentelium	163	genus	98	16		Hypentelium	61315	61315	genus	Hypentelium	7968	family	Catostomidae	7952	order	Cypriniformes	186623	class	Actinopteri	7711	phylum	Chordata
C26T3:1:1102:26957:18797	Hypentelium	163	genus	98	19		Hypentelium	61315	61315	genus	Hypentelium	7968	family	Catostomidae	7952	order	Cypriniformes	186623	class	Actinopteri	7711	phylum	Chordata
C26T3:1:1102:27995:16177	Hypentelium	163	genus	98	15		Hypentelium	61315	61315	genus	Hypentelium	7968	family	Catostomidae	7952	order	Cypriniformes	186623	class	Actinopteri	7711	phylum	Chordata
C26T3:1:1102:3026:18724	Hypentelium	163	genus	98	18		Hypentelium	61315	61315	genus	Hypentelium	7968	family	Catostomidae	7952	order	Cypriniformes	186623	class	Actinopteri	7711	phylum	Chordata
C26T3:1:1102:3346:7563	Hypentelium	163	genus	98	14		Hypentelium	61315	61315	genus	Hypentelium	7968	family	Catostomidae	7952	order	Cypriniformes	186623	class	Actinopteri	7711	phylum	Chordata
C26T3:1:1102:6909:2918	Hypentelium	163	genus	98	6		Hypentelium	61315	61315	genus	Hypentelium	7968	family	Catostomidae	7952	order	Cypriniformes	186623	class	Actinopteri	7711	phylum	Chordata
C26T3:1:1102:8562:20375	Hypentelium	163	genus	98	9		Hypentelium	61315	61315	genus	Hypentelium	7968	family	Catostomidae	7952	order	Cypriniformes	186623	class	Actinopteri	7711	phylum	Chordata
C26T3:1:1103:10533:1913	Hypentelium	163	genus	98	10		Hypentelium	61315	61315	genus	Hypentelium	7968	family	Catostomidae	7952	order	Cypriniformes	186623	class	Actinopteri	7711	phylum	Chordata
C26T3:1:1103:11638:19616	Hypentelium	163	genus	98	15		Hypentelium	61315	61315	genus	Hypentelium	7968	family	Catostomidae	7952	order	Cypriniformes	186623	class	Actinopteri	7711	phylum	Chordata
C26T3:1:1103:14750:16190	Hypentelium	163	genus	98	9		Hypentelium	61315	61315	genus	Hypentelium	7968	family	Catostomidae	7952	order	Cypriniformes	186623	class	Actinopteri	7711	phylum	Chordata
C26T3:1:1103:16777:20974	Hypentelium	163	genus	97	3		Hypentelium	61315	61315	genus	Hypentelium	7968	family	Catostomidae	7952	order	Cypriniformes	186623	class	Actinopteri	7711	phylum	Chordata
C26T3:1:1103:19236:12954	Hypentelium	163	genus	98	17		Hypentelium	61315	61315	genus	Hypentelium	7968	family	Catostomidae	7952	order	Cypriniformes	186623	class	Actinopteri	7711	phylum	Chordata
C26T3:1:1103:25070:23534	Hypentelium	163	genus	98	8		Hypentelium	61315	61315	genus	Hypentelium	7968	family	Catostomidae	7952	order	Cypriniformes	186623	class	Actinopteri	7711	phylum	Chordata
C26T3:1:1103:25668:15339	Hypentelium	163	genus	98	22		Hypentelium	61315	61315	genus	Hypentelium	7968	family	Catostomidae	7952	order	Cypriniformes	186623	class	Actinopteri	7711	phylum	Chordata
C26T3:1:1103:4893:16530	Hypentelium	163	genus	98	14		Hypentelium	61315	61315	genus	Hypentelium	7968	family	Catostomidae	7952	order	Cypriniformes	186623	class	Actinopteri	7711	phylum	Chordata
C26T3:1:1103:5949:5535	Hypentelium	163	genus	98	15		Hypentelium	61315	61315	genus	Hypentelium	7968	family	Catostomidae	7952	order	Cypriniformes	186623	class	Actinopteri	7711	phylum	Chordata
C26T3:1:1103:8649:7309	Hypentelium	163	genus	98	3		Hypentelium	61315	61315	genus	Hypentelium	7968	family	Catostomidae	7952	order	Cypriniformes	186623	class	Actinopteri	7711	phylum	Chordata
C26T3:1:1103:9274:11155	Hypentelium	163	genus	98	3		Hypentelium	61315	61315	genus	Hypentelium	7968	family	Catostomidae	7952	order	Cypriniformes	186623	class	Actinopteri	7711	phylum	Chordata
C26T3:1:1104:12448:11170	Hypentelium	163	genus	98	25		Hypentelium	61315	61315	genus	Hypentelium	7968	family	Catostomidae	7952	order	Cypriniformes	186623	class	Actinopteri	7711	phylum	Chordata
C26T3:1:1104:15282:18646	Hypentelium	163	genus	98	8		Hypentelium	61315	61315	genus	Hypentelium	7968	family	Catostomidae	7952	order	Cypriniformes	186623	class	Actinopteri	7711	phylum	Chordata
C26T3:1:1104:18656:21073	Hypentelium	163	genus	98	6		Hypentelium	61315	61315	genus	Hypentelium	7968	family	Catostomidae	7952	order	Cypriniformes	186623	class	Actinopteri	7711	phylum	Chordata
C26T3:1:1104:22919:12095	Hypentelium	163	genus	98	5		Hypentelium	61315	61315	genus	Hypentelium	7968	family	Catostomidae	7952	order	Cypriniformes	186623	class	Actinopteri	7711	phylum	Chordata
C26T3:1:1104:3041:14770	Hypentelium	163	genus	98	9		Hypentelium	61315	61315	genus	Hypentelium	7968	family	Catostomidae	7952	order	Cypriniformes	186623	class	Actinopteri	7711	phylum	Chordata
C26T3:1:1104:7815:5984	Hypentelium	163	genus	98	4		Hypentelium	61315	61315	genus	Hypentelium	7968	family	Catostomidae	7952	order	Cypriniformes	186623	class	Actinopteri	7711	phylum	Chordata
C26T3:1:1105:11595:17655	Hypentelium	163	genus	98	6		Hypentelium	61315	61315	genus	Hypentelium	7968	family	Catostomidae	7952	order	Cypriniformes	186623	class	Actinopteri	7711	phylum	Chordata
C26T3:1:1105:19077:18219	Hypentelium	163	genus	98	6		Hypentelium	61315	61315	genus	Hypentelium	7968	family	Catostomidae	7952	order	Cypriniformes	186623	class	Actinopteri	7711	phylum	Chordata
C26T3:1:1105:21946:15631	Hypentelium	163	genus	98	9		Hypentelium	61315	61315	genus	Hypentelium	7968	family	Catostomidae	7952	order	Cypriniformes	186623	class	Actinopteri	7711	phylum	Chordata
C26T3:1:1105:22978:10081	Hypentelium	163	genus	97	8		Hypentelium	61315	61315	genus	Hypentelium	7968	family	Catostomidae	7952	order	Cypriniformes	186623	class	Actinopteri	7711	phylum	Chordata
C26T3:1:1105:23547:10397	Hypentelium	163	genus	98	7		Hypentelium	61315	61315	genus	Hypentelium	7968	family	Catostomidae	7952	order	Cypriniformes	186623	class	Actinopteri	7711	phylum	Chordata
C26T3:1:1105:23602:15806	Hypentelium	163	genus	98	5		Hypentelium	61315	61315	genus	Hypentelium	7968	family	Catostomidae	7952	order	Cypriniformes	186623	class	Actinopteri	7711	phylum	Chordata
C26T3:1:1106:11415:19062	Hypentelium	163	genus	100	6		Hypentelium	61315	61315	genus	Hypentelium	7968	family	Catostomidae	7952	order	Cypriniformes	186623	class	Actinopteri	7711	phylum	Chordata
C26T3:1:1106:19041:6236	Hypentelium	163	genus	98	6		Hypentelium	61315	61315	genus	Hypentelium	7968	family	Catostomidae	7952	order	Cypriniformes	186623	class	Actinopteri	7711	phylum	Chordata
C26T3:1:1106:24669:6477	Hypentelium	163	genus	98	5		Hypentelium	61315	61315	genus	Hypentelium	7968	family	Catostomidae	7952	order	Cypriniformes	186623	class	Actinopteri	7711	phylum	Chordata
C26T3:1:1107:15365:23521	Hypentelium	163	genus	98	8		Hypentelium	61315	61315	genus	Hypentelium	7968	family	Catostomidae	7952	order	Cypriniformes	186623	class	Actinopteri	7711	phylum	Chordata
C26T3:1:1107:21308:24069	Hypentelium	163	genus	97	2		Hypentelium	61315	61315	genus	Hypentelium	7968	family	Catostomidae	7952	order	Cypriniformes	186623	class	Actinopteri	7711	phylum	Chordata
C26T3:1:1107:26950:9336	Hypentelium	163	genus	98	2		Hypentelium	61315	61315	genus	Hypentelium	7968	family	Catostomidae	7952	order	Cypriniformes	186623	class	Actinopteri	7711	phylum	Chordata
C26T3:1:1107:7711:7319	Hypentelium	163	genus	97	4		Hypentelium	61315	61315	genus	Hypentelium	7968	family	Catostomidae	7952	order	Cypriniformes	186623	class	Actinopteri	7711	phylum	Chordata
C26T3:1:1108:13057:16370	Hypentelium	163	genus	98	8		Hypentelium	61315	61315	genus	Hypentelium	7968	family	Catostomidae	7952	order	Cypriniformes	186623	class	Actinopteri	7711	phylum	Chordata
C26T3:1:1108:14076:12473	Hypentelium	163	genus	98	8		Hypentelium	61315	61315	genus	Hypentelium	7968	family	Catostomidae	7952	order	Cypriniformes	186623	class	Actinopteri	7711	phylum	Chordata
C26T3:1:1108:16566:22271	Hypentelium	163	genus	98	5		Hypentelium	61315	61315	genus	Hypentelium	7968	family	Catostomidae	7952	order	Cypriniformes	186623	class	Actinopteri	7711	phylum	Chordata
C26T3:1:1108:20327:4464	Hypentelium	163	genus	100	7		Hypentelium	61315	61315	genus	Hypentelium	7968	family	Catostomidae	7952	order	Cypriniformes	186623	class	Actinopteri	7711	phylum	Chordata
C26T3:1:1108:20611:1674	Hypentelium	163	genus	98	6		Hypentelium	61315	61315	genus	Hypentelium	7968	family	Catostomidae	7952	order	Cypriniformes	186623	class	Actinopteri	7711	phylum	Chordata
C26T3:1:1108:25914:15670	Hypentelium	163	genus	98	2		Hypentelium	61315	61315	genus	Hypentelium	7968	family	Catostomidae	7952	order	Cypriniformes	186623	class	Actinopteri	7711	phylum	Chordata
C26T3:1:1108:27553:10881	Hypentelium	163	genus	98	2		Hypentelium	61315	61315	genus	Hypentelium	7968	family	Catostomidae	7952	order	Cypriniformes	186623	class	Actinopteri	7711	phylum	Chordata
C26T3:1:1108:3750:17747	Hypentelium	163	genus	97	3		Hypentelium	61315	61315	genus	Hypentelium	7968	family	Catostomidae	7952	order	Cypriniformes	186623	class	Actinopteri	7711	phylum	Chordata
C26T3:1:1108:6767:16740	Hypentelium	163	genus	98	10		Hypentelium	61315	61315	genus	Hypentelium	7968	family	Catostomidae	7952	order	Cypriniformes	186623	class	Actinopteri	7711	phylum	Chordata
C26T3:1:1109:16290:3696	Hypentelium	163	genus	98	3		Hypentelium	61315	61315	genus	Hypentelium	7968	family	Catostomidae	7952	order	Cypriniformes	186623	class	Actinopteri	7711	phylum	Chordata
C26T3:1:1109:16677:19547	Hypentelium	163	genus	98	2		Hypentelium	61315	61315	genus	Hypentelium	7968	family	Catostomidae	7952	order	Cypriniformes	186623	class	Actinopteri	7711	phylum	Chordata
C26T3:1:1109:21102:5451	Hypentelium	163	genus	98	5		Hypentelium	61315	61315	genus	Hypentelium	7968	family	Catostomidae	7952	order	Cypriniformes	186623	class	Actinopteri	7711	phylum	Chordata
C26T3:1:1109:3635:18259	Hypentelium	163	genus	98	8		Hypentelium	61315	61315	genus	Hypentelium	7968	family	Catostomidae	7952	order	Cypriniformes	186623	class	Actinopteri	7711	phylum	Chordata
C26T3:1:1109:5700:14670	Hypentelium	163	genus	98	9		Hypentelium	61315	61315	genus	Hypentelium	7968	family	Catostomidae	7952	order	Cypriniformes	186623	class	Actinopteri	7711	phylum	Chordata
C26T3:1:1110:11291:15912	Hypentelium	163	genus	98	2		Hypentelium	61315	61315	genus	Hypentelium	7968	family	Catostomidae	7952	order	Cypriniformes	186623	class	Actinopteri	7711	phylum	Chordata
C26T3:1:1111:10916:24622	Hypentelium	163	genus	98	4		Hypentelium	61315	61315	genus	Hypentelium	7968	family	Catostomidae	7952	order	Cypriniformes	186623	class	Actinopteri	7711	phylum	Chordata
C26T3:1:1111:19499:1246	Hypentelium	163	genus	98	6		Hypentelium	61315	61315	genus	Hypentelium	7968	family	Catostomidae	7952	order	Cypriniformes	186623	class	Actinopteri	7711	phylum	Chordata
C26T3:1:1112:15895:6227	Hypentelium	163	genus	98	6		Hypentelium	61315	61315	genus	Hypentelium	7968	family	Catostomidae	7952	order	Cypriniformes	186623	class	Actinopteri	7711	phylum	Chordata
C26T3:1:1112:4418:9660	Hypentelium	163	genus	98	6		Hypentelium	61315	61315	genus	Hypentelium	7968	family	Catostomidae	7952	order	Cypriniformes	186623	class	Actinopteri	7711	phylum	Chordata
C26T3:1:1112:7496:7099	Hypentelium	163	genus	100	7		Hypentelium	61315	61315	genus	Hypentelium	7968	family	Catostomidae	7952	order	Cypriniformes	186623	class	Actinopteri	7711	phylum	Chordata
C26T3:1:1118:5653:9604	Hypentelium	163	genus	98	3		Hypentelium	61315	61315	genus	Hypentelium	7968	family	Catostomidae	7952	order	Cypriniformes	186623	class	Actinopteri	7711	phylum	Chordata
C26T3:1:1118:9780:8479	Hypentelium	163	genus	97	2		Hypentelium	61315	61315	genus	Hypentelium	7968	family	Catostomidae	7952	order	Cypriniformes	186623	class	Actinopteri	7711	phylum	Chordata
C26T3:1:1119:17421:2974	Hypentelium	163	genus	96	2		Hypentelium	61315	61315	genus	Hypentelium	7968	family	Catostomidae	7952	order	Cypriniformes	186623	class	Actinopteri	7711	phylum	Chordata
C26T3:1:2105:8353:10686	Hypentelium	163	genus	99	14		Hypentelium	61315	61315	genus	Hypentelium	7968	family	Catostomidae	7952	order	Cypriniformes	186623	class	Actinopteri	7711	phylum	Chordata
C26T3:1:2106:15979:3615	Hypentelium	163	genus	97	2		Hypentelium	61315	61315	genus	Hypentelium	7968	family	Catostomidae	7952	order	Cypriniformes	186623	class	Actinopteri	7711	phylum	Chordata
C26T3:1:2110:23411:18535	Hypentelium	163	genus	98	3		Hypentelium	61315	61315	genus	Hypentelium	7968	family	Catostomidae	7952	order	Cypriniformes	186623	class	Actinopteri	7711	phylum	Chordata
C26T3:1:2111:27647:19525	Hypentelium	163	genus	98	2		Hypentelium	61315	61315	genus	Hypentelium	7968	family	Catostomidae	7952	order	Cypriniformes	186623	class	Actinopteri	7711	phylum	Chordata
C26T3:1:2117:13361:15154	Hypentelium	163	genus	98	2		Hypentelium	61315	61315	genus	Hypentelium	7968	family	Catostomidae	7952	order	Cypriniformes	186623	class	Actinopteri	7711	phylum	Chordata
C26T3:1:2118:8838:22655	Hypentelium	163	genus	98	2		Hypentelium	61315	61315	genus	Hypentelium	7968	family	Catostomidae	7952	order	Cypriniformes	186623	class	Actinopteri	7711	phylum	Chordata
C26T3:1:1101:24830:6816	Hypentelium	161	genus	100	43		Hypentelium	61315	61315	genus	Hypentelium	7968	family	Catostomidae	7952	order	Cypriniformes	186623	class	Actinopteri	7711	phylum	Chordata
C26T3:1:1102:10948:16448	Hypentelium	161	genus	99	2		Hypentelium	61315	61315	genus	Hypentelium	7968	family	Catostomidae	7952	order	Cypriniformes	186623	class	Actinopteri	7711	phylum	Chordata
C26T3:1:1103:11819:21579	Hypentelium	161	genus	100	3		Hypentelium	61315	61315	genus	Hypentelium	7968	family	Catostomidae	7952	order	Cypriniformes	186623	class	Actinopteri	7711	phylum	Chordata
C26T3:1:1103:22975:16781	Hypentelium	161	genus	98	27		Hypentelium	61315	61315	genus	Hypentelium	7968	family	Catostomidae	7952	order	Cypriniformes	186623	class	Actinopteri	7711	phylum	Chordata
C26T3:1:1103:4218:6759	Hypentelium	161	genus	99	3		Hypentelium	61315	61315	genus	Hypentelium	7968	family	Catostomidae	7952	order	Cypriniformes	186623	class	Actinopteri	7711	phylum	Chordata
C26T3:1:1104:24193:18147	Hypentelium	161	genus	98	3		Hypentelium	61315	61315	genus	Hypentelium	7968	family	Catostomidae	7952	order	Cypriniformes	186623	class	Actinopteri	7711	phylum	Chordata
C26T3:1:1109:20746:15105	Hypentelium	161	genus	99	43		Hypentelium	61315	61315	genus	Hypentelium	7968	family	Catostomidae	7952	order	Cypriniformes	186623	class	Actinopteri	7711	phylum	Chordata
C26T3:1:1110:24632:6934	Hypentelium	161	genus	98	2		Hypentelium	61315	61315	genus	Hypentelium	7968	family	Catostomidae	7952	order	Cypriniformes	186623	class	Actinopteri	7711	phylum	Chordata
C26T3:1:1114:25583:19869	Hypentelium	161	genus	100	2		Hypentelium	61315	61315	genus	Hypentelium	7968	family	Catostomidae	7952	order	Cypriniformes	186623	class	Actinopteri	7711	phylum	Chordata
C26T3:1:1117:24701:6028	Hypentelium	161	genus	98	4		Hypentelium	61315	61315	genus	Hypentelium	7968	family	Catostomidae	7952	order	Cypriniformes	186623	class	Actinopteri	7711	phylum	Chordata
C26T3:1:1118:5572:19093	Hypentelium	161	genus	99	2		Hypentelium	61315	61315	genus	Hypentelium	7968	family	Catostomidae	7952	order	Cypriniformes	186623	class	Actinopteri	7711	phylum	Chordata
C26T3:1:2102:9592:17169	Hypentelium	161	genus	98	6		Hypentelium	61315	61315	genus	Hypentelium	7968	family	Catostomidae	7952	order	Cypriniformes	186623	class	Actinopteri	7711	phylum	Chordata
C26T3:1:2103:15061:16754	Hypentelium	161	genus	98	11		Hypentelium	61315	61315	genus	Hypentelium	7968	family	Catostomidae	7952	order	Cypriniformes	186623	class	Actinopteri	7711	phylum	Chordata
C26T3:1:2108:14890:15975	Hypentelium	161	genus	96	2		Hypentelium	61315	61315	genus	Hypentelium	7968	family	Catostomidae	7952	order	Cypriniformes	186623	class	Actinopteri	7711	phylum	Chordata
C26T3:1:2109:11674:9078	Hypentelium	161	genus	95	2		Hypentelium	61315	61315	genus	Hypentelium	7968	family	Catostomidae	7952	order	Cypriniformes	186623	class	Actinopteri	7711	phylum	Chordata
C26T3:1:1101:11018:11730	Hypentelium	159	genus	98	3		Hypentelium	61315	61315	genus	Hypentelium	7968	family	Catostomidae	7952	order	Cypriniformes	186623	class	Actinopteri	7711	phylum	Chordata
C26T3:1:1101:11562:8752	Hypentelium	159	genus	98	51		Hypentelium	61315	61315	genus	Hypentelium	7968	family	Catostomidae	7952	order	Cypriniformes	186623	class	Actinopteri	7711	phylum	Chordata
C26T3:1:1101:13950:15558	Hypentelium	159	genus	99	50		Hypentelium	61315	61315	genus	Hypentelium	7968	family	Catostomidae	7952	order	Cypriniformes	186623	class	Actinopteri	7711	phylum	Chordata
C26T3:1:1101:21038:15084	Hypentelium	159	genus	99	3		Hypentelium	61315	61315	genus	Hypentelium	7968	family	Catostomidae	7952	order	Cypriniformes	186623	class	Actinopteri	7711	phylum	Chordata
C26T3:1:1101:21600:14909	Hypentelium	159	genus	99	3		Hypentelium	61315	61315	genus	Hypentelium	7968	family	Catostomidae	7952	order	Cypriniformes	186623	class	Actinopteri	7711	phylum	Chordata
C26T3:1:1101:22551:24244	Hypentelium	159	genus	99	2		Hypentelium	61315	61315	genus	Hypentelium	7968	family	Catostomidae	7952	order	Cypriniformes	186623	class	Actinopteri	7711	phylum	Chordata
C26T3:1:1101:2325:14316	Hypentelium	159	genus	99	6		Hypentelium	61315	61315	genus	Hypentelium	7968	family	Catostomidae	7952	order	Cypriniformes	186623	class	Actinopteri	7711	phylum	Chordata
C26T3:1:1101:23718:1796	Hypentelium	159	genus	99	2		Hypentelium	61315	61315	genus	Hypentelium	7968	family	Catostomidae	7952	order	Cypriniformes	186623	class	Actinopteri	7711	phylum	Chordata
C26T3:1:1102:8440:22687	Hypentelium	159	genus	99	3		Hypentelium	61315	61315	genus	Hypentelium	7968	family	Catostomidae	7952	order	Cypriniformes	186623	class	Actinopteri	7711	phylum	Chordata
C26T3:1:1103:12368:12021	Hypentelium	159	genus	98	9		Hypentelium	61315	61315	genus	Hypentelium	7968	family	Catostomidae	7952	order	Cypriniformes	186623	class	Actinopteri	7711	phylum	Chordata
C26T3:1:1103:15543:21079	Hypentelium	159	genus	99	2		Hypentelium	61315	61315	genus	Hypentelium	7968	family	Catostomidae	7952	order	Cypriniformes	186623	class	Actinopteri	7711	phylum	Chordata
C26T3:1:1103:16418:16464	Hypentelium	159	genus	99	4		Hypentelium	61315	61315	genus	Hypentelium	7968	family	Catostomidae	7952	order	Cypriniformes	186623	class	Actinopteri	7711	phylum	Chordata
C26T3:1:1103:16622:16243	Hypentelium	159	genus	100	69		Hypentelium	61315	61315	genus	Hypentelium	7968	family	Catostomidae	7952	order	Cypriniformes	186623	class	Actinopteri	7711	phylum	Chordata
C26T3:1:1103:24264:11498	Hypentelium	159	genus	99	4		Hypentelium	61315	61315	genus	Hypentelium	7968	family	Catostomidae	7952	order	Cypriniformes	186623	class	Actinopteri	7711	phylum	Chordata
C26T3:1:1103:27304:6386	Hypentelium	159	genus	99	3		Hypentelium	61315	61315	genus	Hypentelium	7968	family	Catostomidae	7952	order	Cypriniformes	186623	class	Actinopteri	7711	phylum	Chordata
C26T3:1:1103:8986:16867	Hypentelium	159	genus	99	2		Hypentelium	61315	61315	genus	Hypentelium	7968	family	Catostomidae	7952	order	Cypriniformes	186623	class	Actinopteri	7711	phylum	Chordata
C26T3:1:1104:14413:1730	Hypentelium	159	genus	99	4		Hypentelium	61315	61315	genus	Hypentelium	7968	family	Catostomidae	7952	order	Cypriniformes	186623	class	Actinopteri	7711	phylum	Chordata
C26T3:1:1104:18008:4837	Hypentelium	159	genus	99	9		Hypentelium	61315	61315	genus	Hypentelium	7968	family	Catostomidae	7952	order	Cypriniformes	186623	class	Actinopteri	7711	phylum	Chordata
C26T3:1:1104:19546:14705	Hypentelium	159	genus	99	3		Hypentelium	61315	61315	genus	Hypentelium	7968	family	Catostomidae	7952	order	Cypriniformes	186623	class	Actinopteri	7711	phylum	Chordata
C26T3:1:1105:11590:22070	Hypentelium	159	genus	99	4		Hypentelium	61315	61315	genus	Hypentelium	7968	family	Catostomidae	7952	order	Cypriniformes	186623	class	Actinopteri	7711	phylum	Chordata
C26T3:1:1105:23612:6071	Hypentelium	159	genus	99	3		Hypentelium	61315	61315	genus	Hypentelium	7968	family	Catostomidae	7952	order	Cypriniformes	186623	class	Actinopteri	7711	phylum	Chordata
C26T3:1:1106:11814:11901	Hypentelium	159	genus	99	4		Hypentelium	61315	61315	genus	Hypentelium	7968	family	Catostomidae	7952	order	Cypriniformes	186623	class	Actinopteri	7711	phylum	Chordata
C26T3:1:1106:14303:23011	Hypentelium	159	genus	99	6		Hypentelium	61315	61315	genus	Hypentelium	7968	family	Catostomidae	7952	order	Cypriniformes	186623	class	Actinopteri	7711	phylum	Chordata
C26T3:1:1106:17711:21745	Hypentelium	159	genus	99	2		Hypentelium	61315	61315	genus	Hypentelium	7968	family	Catostomidae	7952	order	Cypriniformes	186623	class	Actinopteri	7711	phylum	Chordata
C26T3:1:1106:17961:2306	Hypentelium	159	genus	100	3		Hypentelium	61315	61315	genus	Hypentelium	7968	family	Catostomidae	7952	order	Cypriniformes	186623	class	Actinopteri	7711	phylum	Chordata
C26T3:1:1106:27557:12137	Hypentelium	159	genus	98	2		Hypentelium	61315	61315	genus	Hypentelium	7968	family	Catostomidae	7952	order	Cypriniformes	186623	class	Actinopteri	7711	phylum	Chordata
C26T3:1:1107:16006:14019	Hypentelium	159	genus	99	5		Hypentelium	61315	61315	genus	Hypentelium	7968	family	Catostomidae	7952	order	Cypriniformes	186623	class	Actinopteri	7711	phylum	Chordata
C26T3:1:1107:4422:14170	Hypentelium	159	genus	99	4		Hypentelium	61315	61315	genus	Hypentelium	7968	family	Catostomidae	7952	order	Cypriniformes	186623	class	Actinopteri	7711	phylum	Chordata
C26T3:1:1107:5950:14718	Hypentelium	159	genus	99	3		Hypentelium	61315	61315	genus	Hypentelium	7968	family	Catostomidae	7952	order	Cypriniformes	186623	class	Actinopteri	7711	phylum	Chordata
C26T3:1:1107:6505:3611	Hypentelium	159	genus	99	2		Hypentelium	61315	61315	genus	Hypentelium	7968	family	Catostomidae	7952	order	Cypriniformes	186623	class	Actinopteri	7711	phylum	Chordata
C26T3:1:1108:15098:23079	Hypentelium	159	genus	99	2		Hypentelium	61315	61315	genus	Hypentelium	7968	family	Catostomidae	7952	order	Cypriniformes	186623	class	Actinopteri	7711	phylum	Chordata
C26T3:1:1108:24150:9885	Hypentelium	159	genus	99	4		Hypentelium	61315	61315	genus	Hypentelium	7968	family	Catostomidae	7952	order	Cypriniformes	186623	class	Actinopteri	7711	phylum	Chordata
C26T3:1:1109:21572:19954	Hypentelium	159	genus	99	2		Hypentelium	61315	61315	genus	Hypentelium	7968	family	Catostomidae	7952	order	Cypriniformes	186623	class	Actinopteri	7711	phylum	Chordata
C26T3:1:1109:27087:7443	Hypentelium	159	genus	99	6		Hypentelium	61315	61315	genus	Hypentelium	7968	family	Catostomidae	7952	order	Cypriniformes	186623	class	Actinopteri	7711	phylum	Chordata
C26T3:1:1109:27940:15507	Hypentelium	159	genus	99	3		Hypentelium	61315	61315	genus	Hypentelium	7968	family	Catostomidae	7952	order	Cypriniformes	186623	class	Actinopteri	7711	phylum	Chordata
C26T3:1:1109:3691:11060	Hypentelium	159	genus	99	6		Hypentelium	61315	61315	genus	Hypentelium	7968	family	Catostomidae	7952	order	Cypriniformes	186623	class	Actinopteri	7711	phylum	Chordata
C26T3:1:1111:13025:15088	Hypentelium	159	genus	98	3		Hypentelium	61315	61315	genus	Hypentelium	7968	family	Catostomidae	7952	order	Cypriniformes	186623	class	Actinopteri	7711	phylum	Chordata
C26T3:1:1113:19592:22238	Hypentelium	159	genus	99	3		Hypentelium	61315	61315	genus	Hypentelium	7968	family	Catostomidae	7952	order	Cypriniformes	186623	class	Actinopteri	7711	phylum	Chordata
C26T3:1:1113:7685:8357	Hypentelium	159	genus	99	3		Hypentelium	61315	61315	genus	Hypentelium	7968	family	Catostomidae	7952	order	Cypriniformes	186623	class	Actinopteri	7711	phylum	Chordata
C26T3:1:1113:9744:11089	Hypentelium	159	genus	95	2		Hypentelium	61315	61315	genus	Hypentelium	7968	family	Catostomidae	7952	order	Cypriniformes	186623	class	Actinopteri	7711	phylum	Chordata
C26T3:1:1114:7736:13218	Hypentelium	159	genus	99	4		Hypentelium	61315	61315	genus	Hypentelium	7968	family	Catostomidae	7952	order	Cypriniformes	186623	class	Actinopteri	7711	phylum	Chordata
C26T3:1:1115:6726:7459	Hypentelium	159	genus	99	2		Hypentelium	61315	61315	genus	Hypentelium	7968	family	Catostomidae	7952	order	Cypriniformes	186623	class	Actinopteri	7711	phylum	Chordata
C26T3:1:1116:10009:11710	Hypentelium	159	genus	99	2		Hypentelium	61315	61315	genus	Hypentelium	7968	family	Catostomidae	7952	order	Cypriniformes	186623	class	Actinopteri	7711	phylum	Chordata
C26T3:1:1117:25055:7243	Hypentelium	159	genus	99	3		Hypentelium	61315	61315	genus	Hypentelium	7968	family	Catostomidae	7952	order	Cypriniformes	186623	class	Actinopteri	7711	phylum	Chordata
C26T3:1:1118:10911:6148	Hypentelium	159	genus	98	3		Hypentelium	61315	61315	genus	Hypentelium	7968	family	Catostomidae	7952	order	Cypriniformes	186623	class	Actinopteri	7711	phylum	Chordata
C26T3:1:1118:15787:18405	Hypentelium	159	genus	97	3		Hypentelium	61315	61315	genus	Hypentelium	7968	family	Catostomidae	7952	order	Cypriniformes	186623	class	Actinopteri	7711	phylum	Chordata
C26T3:1:2101:2179:13812	Hypentelium	159	genus	95	2		Hypentelium	61315	61315	genus	Hypentelium	7968	family	Catostomidae	7952	order	Cypriniformes	186623	class	Actinopteri	7711	phylum	Chordata
C26T3:1:2101:5784:17704	Hypentelium	159	genus	99	2		Hypentelium	61315	61315	genus	Hypentelium	7968	family	Catostomidae	7952	order	Cypriniformes	186623	class	Actinopteri	7711	phylum	Chordata
C26T3:1:2103:7596:5713	Hypentelium	159	genus	98	2		Hypentelium	61315	61315	genus	Hypentelium	7968	family	Catostomidae	7952	order	Cypriniformes	186623	class	Actinopteri	7711	phylum	Chordata
C26T3:1:2105:7081:4060	Hypentelium	159	genus	99	2		Hypentelium	61315	61315	genus	Hypentelium	7968	family	Catostomidae	7952	order	Cypriniformes	186623	class	Actinopteri	7711	phylum	Chordata
C26T3:1:2107:9158:19134	Hypentelium	159	genus	99	3		Hypentelium	61315	61315	genus	Hypentelium	7968	family	Catostomidae	7952	order	Cypriniformes	186623	class	Actinopteri	7711	phylum	Chordata
C26T3:1:2109:9411:11342	Hypentelium	159	genus	99	2		Hypentelium	61315	61315	genus	Hypentelium	7968	family	Catostomidae	7952	order	Cypriniformes	186623	class	Actinopteri	7711	phylum	Chordata
C26T3:1:2110:26861:8227	Hypentelium	159	genus	99	2		Hypentelium	61315	61315	genus	Hypentelium	7968	family	Catostomidae	7952	order	Cypriniformes	186623	class	Actinopteri	7711	phylum	Chordata
C26T3:1:2116:26585:4753	Hypentelium	159	genus	95	2		Hypentelium	61315	61315	genus	Hypentelium	7968	family	Catostomidae	7952	order	Cypriniformes	186623	class	Actinopteri	7711	phylum	Chordata
C26T3:1:1101:10015:22431	Hypentelium	158	genus	97	173		Hypentelium	61315	61315	genus	Hypentelium	7968	family	Catostomidae	7952	order	Cypriniformes	186623	class	Actinopteri	7711	phylum	Chordata
C26T3:1:1101:16780:11407	Hypentelium	158	genus	97	8		Hypentelium	61315	61315	genus	Hypentelium	7968	family	Catostomidae	7952	order	Cypriniformes	186623	class	Actinopteri	7711	phylum	Chordata
C26T3:1:1101:16820:19735	Hypentelium	158	genus	97	15		Hypentelium	61315	61315	genus	Hypentelium	7968	family	Catostomidae	7952	order	Cypriniformes	186623	class	Actinopteri	7711	phylum	Chordata
C26T3:1:1102:18710:23619	Hypentelium	158	genus	97	6		Hypentelium	61315	61315	genus	Hypentelium	7968	family	Catostomidae	7952	order	Cypriniformes	186623	class	Actinopteri	7711	phylum	Chordata
C26T3:1:1104:9831:24487	Hypentelium	158	genus	99	10		Hypentelium	61315	61315	genus	Hypentelium	7968	family	Catostomidae	7952	order	Cypriniformes	186623	class	Actinopteri	7711	phylum	Chordata
C26T3:1:1105:20682:24690	Hypentelium	158	genus	99	2		Hypentelium	61315	61315	genus	Hypentelium	7968	family	Catostomidae	7952	order	Cypriniformes	186623	class	Actinopteri	7711	phylum	Chordata
C26T3:1:1105:22233:13067	Hypentelium	158	genus	97	7		Hypentelium	61315	61315	genus	Hypentelium	7968	family	Catostomidae	7952	order	Cypriniformes	186623	class	Actinopteri	7711	phylum	Chordata
C26T3:1:1105:26416:9400	Hypentelium	158	genus	99	2		Hypentelium	61315	61315	genus	Hypentelium	7968	family	Catostomidae	7952	order	Cypriniformes	186623	class	Actinopteri	7711	phylum	Chordata
C26T3:1:1106:24615:21110	Hypentelium	158	genus	97	6		Hypentelium	61315	61315	genus	Hypentelium	7968	family	Catostomidae	7952	order	Cypriniformes	186623	class	Actinopteri	7711	phylum	Chordata
C26T3:1:1107:24850:19700	Hypentelium	158	genus	99	135		Hypentelium	61315	61315	genus	Hypentelium	7968	family	Catostomidae	7952	order	Cypriniformes	186623	class	Actinopteri	7711	phylum	Chordata
C26T3:1:1109:11797:12593	Hypentelium	158	genus	97	4		Hypentelium	61315	61315	genus	Hypentelium	7968	family	Catostomidae	7952	order	Cypriniformes	186623	class	Actinopteri	7711	phylum	Chordata
C26T3:1:1119:10041:1827	Hypentelium	158	genus	95	44		Hypentelium	61315	61315	genus	Hypentelium	7968	family	Catostomidae	7952	order	Cypriniformes	186623	class	Actinopteri	7711	phylum	Chordata
C26T3:1:2104:20078:20050	Hypentelium	158	genus	99	2		Hypentelium	61315	61315	genus	Hypentelium	7968	family	Catostomidae	7952	order	Cypriniformes	186623	class	Actinopteri	7711	phylum	Chordata
C26T3:1:2107:13326:16412	Hypentelium	158	genus	97	2		Hypentelium	61315	61315	genus	Hypentelium	7968	family	Catostomidae	7952	order	Cypriniformes	186623	class	Actinopteri	7711	phylum	Chordata
C26T3:1:2107:2429:15937	Hypentelium	158	genus	97	6		Hypentelium	61315	61315	genus	Hypentelium	7968	family	Catostomidae	7952	order	Cypriniformes	186623	class	Actinopteri	7711	phylum	Chordata
C26T3:1:2114:19666:3133	Hypentelium	158	genus	95	75		Hypentelium	61315	61315	genus	Hypentelium	7968	family	Catostomidae	7952	order	Cypriniformes	186623	class	Actinopteri	7711	phylum	Chordata
C26T3:1:2117:12172:3130	Hypentelium	158	genus	97	2		Hypentelium	61315	61315	genus	Hypentelium	7968	family	Catostomidae	7952	order	Cypriniformes	186623	class	Actinopteri	7711	phylum	Chordata
C26T3:1:1101:11104:19941	Hypentelium	156	genus	95	58		Hypentelium	61315	61315	genus	Hypentelium	7968	family	Catostomidae	7952	order	Cypriniformes	186623	class	Actinopteri	7711	phylum	Chordata
C26T3:1:1101:13321:6610	Hypentelium	156	genus	95	2		Hypentelium	61315	61315	genus	Hypentelium	7968	family	Catostomidae	7952	order	Cypriniformes	186623	class	Actinopteri	7711	phylum	Chordata
C26T3:1:1101:13525:21017	Hypentelium	156	genus	99	92		Hypentelium	61315	61315	genus	Hypentelium	7968	family	Catostomidae	7952	order	Cypriniformes	186623	class	Actinopteri	7711	phylum	Chordata
C26T3:1:1101:16226:11516	Hypentelium	156	genus	97	6		Hypentelium	61315	61315	genus	Hypentelium	7968	family	Catostomidae	7952	order	Cypriniformes	186623	class	Actinopteri	7711	phylum	Chordata
C26T3:1:1102:19261:17942	Hypentelium	156	genus	95	2		Hypentelium	61315	61315	genus	Hypentelium	7968	family	Catostomidae	7952	order	Cypriniformes	186623	class	Actinopteri	7711	phylum	Chordata
C26T3:1:1102:8622:20081	Hypentelium	156	genus	95	3		Hypentelium	61315	61315	genus	Hypentelium	7968	family	Catostomidae	7952	order	Cypriniformes	186623	class	Actinopteri	7711	phylum	Chordata
C26T3:1:1103:18772:8692	Hypentelium	156	genus	95	3		Hypentelium	61315	61315	genus	Hypentelium	7968	family	Catostomidae	7952	order	Cypriniformes	186623	class	Actinopteri	7711	phylum	Chordata
C26T3:1:1103:23503:2123	Hypentelium	156	genus	95	2		Hypentelium	61315	61315	genus	Hypentelium	7968	family	Catostomidae	7952	order	Cypriniformes	186623	class	Actinopteri	7711	phylum	Chordata
C26T3:1:1103:25090:18564	Hypentelium	156	genus	95	4		Hypentelium	61315	61315	genus	Hypentelium	7968	family	Catostomidae	7952	order	Cypriniformes	186623	class	Actinopteri	7711	phylum	Chordata
C26T3:1:1103:5419:9431	Hypentelium	156	genus	95	8		Hypentelium	61315	61315	genus	Hypentelium	7968	family	Catostomidae	7952	order	Cypriniformes	186623	class	Actinopteri	7711	phylum	Chordata
C26T3:1:1104:11766:21065	Hypentelium	156	genus	95	2		Hypentelium	61315	61315	genus	Hypentelium	7968	family	Catostomidae	7952	order	Cypriniformes	186623	class	Actinopteri	7711	phylum	Chordata
C26T3:1:1104:12250:8109	Hypentelium	156	genus	95	2		Hypentelium	61315	61315	genus	Hypentelium	7968	family	Catostomidae	7952	order	Cypriniformes	186623	class	Actinopteri	7711	phylum	Chordata
C26T3:1:1104:27324:8835	Hypentelium	156	genus	95	3		Hypentelium	61315	61315	genus	Hypentelium	7968	family	Catostomidae	7952	order	Cypriniformes	186623	class	Actinopteri	7711	phylum	Chordata
C26T3:1:1104:4703:11080	Hypentelium	156	genus	95	2		Hypentelium	61315	61315	genus	Hypentelium	7968	family	Catostomidae	7952	order	Cypriniformes	186623	class	Actinopteri	7711	phylum	Chordata
C26T3:1:1105:20176:5160	Hypentelium	156	genus	95	2		Hypentelium	61315	61315	genus	Hypentelium	7968	family	Catostomidae	7952	order	Cypriniformes	186623	class	Actinopteri	7711	phylum	Chordata
C26T3:1:1106:13031:16724	Hypentelium	156	genus	95	2		Hypentelium	61315	61315	genus	Hypentelium	7968	family	Catostomidae	7952	order	Cypriniformes	186623	class	Actinopteri	7711	phylum	Chordata
C26T3:1:1106:25608:22114	Hypentelium	156	genus	95	3		Hypentelium	61315	61315	genus	Hypentelium	7968	family	Catostomidae	7952	order	Cypriniformes	186623	class	Actinopteri	7711	phylum	Chordata
C26T3:1:1106:7120:21277	Hypentelium	156	genus	95	2		Hypentelium	61315	61315	genus	Hypentelium	7968	family	Catostomidae	7952	order	Cypriniformes	186623	class	Actinopteri	7711	phylum	Chordata
C26T3:1:1107:12739:11528	Hypentelium	156	genus	95	2		Hypentelium	61315	61315	genus	Hypentelium	7968	family	Catostomidae	7952	order	Cypriniformes	186623	class	Actinopteri	7711	phylum	Chordata
C26T3:1:1108:12202:15002	Hypentelium	156	genus	95	2		Hypentelium	61315	61315	genus	Hypentelium	7968	family	Catostomidae	7952	order	Cypriniformes	186623	class	Actinopteri	7711	phylum	Chordata
C26T3:1:1109:6796:23200	Hypentelium	156	genus	95	2		Hypentelium	61315	61315	genus	Hypentelium	7968	family	Catostomidae	7952	order	Cypriniformes	186623	class	Actinopteri	7711	phylum	Chordata
C26T3:1:1110:14022:6682	Hypentelium	156	genus	95	2		Hypentelium	61315	61315	genus	Hypentelium	7968	family	Catostomidae	7952	order	Cypriniformes	186623	class	Actinopteri	7711	phylum	Chordata
C26T3:1:1110:14475:3933	Hypentelium	156	genus	95	2		Hypentelium	61315	61315	genus	Hypentelium	7968	family	Catostomidae	7952	order	Cypriniformes	186623	class	Actinopteri	7711	phylum	Chordata
C26T3:1:1110:17946:15052	Hypentelium	156	genus	95	3		Hypentelium	61315	61315	genus	Hypentelium	7968	family	Catostomidae	7952	order	Cypriniformes	186623	class	Actinopteri	7711	phylum	Chordata
C26T3:1:1110:7230:12594	Hypentelium	156	genus	95	3		Hypentelium	61315	61315	genus	Hypentelium	7968	family	Catostomidae	7952	order	Cypriniformes	186623	class	Actinopteri	7711	phylum	Chordata
C26T3:1:1111:7622:18860	Hypentelium	156	genus	95	160		Hypentelium	61315	61315	genus	Hypentelium	7968	family	Catostomidae	7952	order	Cypriniformes	186623	class	Actinopteri	7711	phylum	Chordata
C26T3:1:1112:14717:1890	Hypentelium	156	genus	98	4		Hypentelium	61315	61315	genus	Hypentelium	7968	family	Catostomidae	7952	order	Cypriniformes	186623	class	Actinopteri	7711	phylum	Chordata
C26T3:1:1114:20738:22613	Hypentelium	156	genus	95	3		Hypentelium	61315	61315	genus	Hypentelium	7968	family	Catostomidae	7952	order	Cypriniformes	186623	class	Actinopteri	7711	phylum	Chordata
C26T3:1:1114:2129:10661	Hypentelium	156	genus	95	2		Hypentelium	61315	61315	genus	Hypentelium	7968	family	Catostomidae	7952	order	Cypriniformes	186623	class	Actinopteri	7711	phylum	Chordata
C26T3:1:1115:20193:8675	Hypentelium	156	genus	98	3		Hypentelium	61315	61315	genus	Hypentelium	7968	family	Catostomidae	7952	order	Cypriniformes	186623	class	Actinopteri	7711	phylum	Chordata
C26T3:1:1116:18970:10209	Hypentelium	156	genus	95	2		Hypentelium	61315	61315	genus	Hypentelium	7968	family	Catostomidae	7952	order	Cypriniformes	186623	class	Actinopteri	7711	phylum	Chordata
C26T3:1:1117:15912:3002	Hypentelium	156	genus	95	2		Hypentelium	61315	61315	genus	Hypentelium	7968	family	Catostomidae	7952	order	Cypriniformes	186623	class	Actinopteri	7711	phylum	Chordata
C26T3:1:1117:24144:8607	Hypentelium	156	genus	95	2		Hypentelium	61315	61315	genus	Hypentelium	7968	family	Catostomidae	7952	order	Cypriniformes	186623	class	Actinopteri	7711	phylum	Chordata
C26T3:1:1117:28813:17714	Hypentelium	156	genus	95	4		Hypentelium	61315	61315	genus	Hypentelium	7968	family	Catostomidae	7952	order	Cypriniformes	186623	class	Actinopteri	7711	phylum	Chordata
C26T3:1:1118:2768:11830	Hypentelium	156	genus	95	3		Hypentelium	61315	61315	genus	Hypentelium	7968	family	Catostomidae	7952	order	Cypriniformes	186623	class	Actinopteri	7711	phylum	Chordata
C26T3:1:2101:7636:14308	Hypentelium	156	genus	95	2		Hypentelium	61315	61315	genus	Hypentelium	7968	family	Catostomidae	7952	order	Cypriniformes	186623	class	Actinopteri	7711	phylum	Chordata
C26T3:1:2103:10587:6668	Hypentelium	156	genus	99	2		Hypentelium	61315	61315	genus	Hypentelium	7968	family	Catostomidae	7952	order	Cypriniformes	186623	class	Actinopteri	7711	phylum	Chordata
C26T3:1:2103:18033:7985	Hypentelium	156	genus	95	2		Hypentelium	61315	61315	genus	Hypentelium	7968	family	Catostomidae	7952	order	Cypriniformes	186623	class	Actinopteri	7711	phylum	Chordata
C26T3:1:2103:21764:21347	Hypentelium	156	genus	95	2		Hypentelium	61315	61315	genus	Hypentelium	7968	family	Catostomidae	7952	order	Cypriniformes	186623	class	Actinopteri	7711	phylum	Chordata
C26T3:1:2105:13154:22581	Hypentelium	156	genus	95	3		Hypentelium	61315	61315	genus	Hypentelium	7968	family	Catostomidae	7952	order	Cypriniformes	186623	class	Actinopteri	7711	phylum	Chordata
C26T3:1:2105:14162:11532	Hypentelium	156	genus	95	3		Hypentelium	61315	61315	genus	Hypentelium	7968	family	Catostomidae	7952	order	Cypriniformes	186623	class	Actinopteri	7711	phylum	Chordata
C26T3:1:2105:9008:20846	Hypentelium	156	genus	95	2		Hypentelium	61315	61315	genus	Hypentelium	7968	family	Catostomidae	7952	order	Cypriniformes	186623	class	Actinopteri	7711	phylum	Chordata
C26T3:1:2107:7946:16533	Hypentelium	156	genus	95	2		Hypentelium	61315	61315	genus	Hypentelium	7968	family	Catostomidae	7952	order	Cypriniformes	186623	class	Actinopteri	7711	phylum	Chordata
C26T3:1:2108:9192:24098	Hypentelium	156	genus	95	2		Hypentelium	61315	61315	genus	Hypentelium	7968	family	Catostomidae	7952	order	Cypriniformes	186623	class	Actinopteri	7711	phylum	Chordata
C26T3:1:1101:2570:15738	Hypentelium	154	genus	98	418		Hypentelium	61315	61315	genus	Hypentelium	7968	family	Catostomidae	7952	order	Cypriniformes	186623	class	Actinopteri	7711	phylum	Chordata
C26T3:1:1101:26089:20339	Hypentelium	154	genus	95	93		Hypentelium	61315	61315	genus	Hypentelium	7968	family	Catostomidae	7952	order	Cypriniformes	186623	class	Actinopteri	7711	phylum	Chordata
C26T3:1:1101:5726:10534	Hypentelium	154	genus	95	2		Hypentelium	61315	61315	genus	Hypentelium	7968	family	Catostomidae	7952	order	Cypriniformes	186623	class	Actinopteri	7711	phylum	Chordata
C26T3:1:1102:12803:22602	Hypentelium	154	genus	97	2		Hypentelium	61315	61315	genus	Hypentelium	7968	family	Catostomidae	7952	order	Cypriniformes	186623	class	Actinopteri	7711	phylum	Chordata
C26T3:1:1102:27694:20070	Hypentelium	154	genus	95	2		Hypentelium	61315	61315	genus	Hypentelium	7968	family	Catostomidae	7952	order	Cypriniformes	186623	class	Actinopteri	7711	phylum	Chordata
C26T3:1:1103:18679:17483	Hypentelium	154	genus	98	2		Hypentelium	61315	61315	genus	Hypentelium	7968	family	Catostomidae	7952	order	Cypriniformes	186623	class	Actinopteri	7711	phylum	Chordata
C26T3:1:1104:5407:13212	Hypentelium	154	genus	98	2		Hypentelium	61315	61315	genus	Hypentelium	7968	family	Catostomidae	7952	order	Cypriniformes	186623	class	Actinopteri	7711	phylum	Chordata
C26T3:1:1106:18520:20425	Hypentelium	154	genus	98	6		Hypentelium	61315	61315	genus	Hypentelium	7968	family	Catostomidae	7952	order	Cypriniformes	186623	class	Actinopteri	7711	phylum	Chordata
C26T3:1:1106:24780:16059	Hypentelium	154	genus	98	2		Hypentelium	61315	61315	genus	Hypentelium	7968	family	Catostomidae	7952	order	Cypriniformes	186623	class	Actinopteri	7711	phylum	Chordata
C26T3:1:1106:27727:12524	Hypentelium	154	genus	95	370		Hypentelium	61315	61315	genus	Hypentelium	7968	family	Catostomidae	7952	order	Cypriniformes	186623	class	Actinopteri	7711	phylum	Chordata
C26T3:1:1106:6529:18337	Hypentelium	154	genus	98	9		Hypentelium	61315	61315	genus	Hypentelium	7968	family	Catostomidae	7952	order	Cypriniformes	186623	class	Actinopteri	7711	phylum	Chordata
C26T3:1:1112:23019:10610	Hypentelium	154	genus	99	25		Hypentelium	61315	61315	genus	Hypentelium	7968	family	Catostomidae	7952	order	Cypriniformes	186623	class	Actinopteri	7711	phylum	Chordata
C26T3:1:2102:20642:25023	Hypentelium	154	genus	98	3		Hypentelium	61315	61315	genus	Hypentelium	7968	family	Catostomidae	7952	order	Cypriniformes	186623	class	Actinopteri	7711	phylum	Chordata
C26T3:1:2104:11341:20313	Hypentelium	154	genus	97	75		Hypentelium	61315	61315	genus	Hypentelium	7968	family	Catostomidae	7952	order	Cypriniformes	186623	class	Actinopteri	7711	phylum	Chordata
C26T3:1:2104:25059:14829	Hypentelium	154	genus	99	4		Hypentelium	61315	61315	genus	Hypentelium	7968	family	Catostomidae	7952	order	Cypriniformes	186623	class	Actinopteri	7711	phylum	Chordata
C26T3:1:2111:8040:17698	Hypentelium	154	genus	98	3		Hypentelium	61315	61315	genus	Hypentelium	7968	family	Catostomidae	7952	order	Cypriniformes	186623	class	Actinopteri	7711	phylum	Chordata
C26T3:1:2117:26562:5037	Hypentelium	154	genus	99	2		Hypentelium	61315	61315	genus	Hypentelium	7968	family	Catostomidae	7952	order	Cypriniformes	186623	class	Actinopteri	7711	phylum	Chordata
C26T3:1:1101:14390:1433	Hypentelium	152	genus	96	7		Hypentelium	61315	61315	genus	Hypentelium	7968	family	Catostomidae	7952	order	Cypriniformes	186623	class	Actinopteri	7711	phylum	Chordata
C26T3:1:1101:14727:15874	Hypentelium	152	genus	95	28		Hypentelium	61315	61315	genus	Hypentelium	7968	family	Catostomidae	7952	order	Cypriniformes	186623	class	Actinopteri	7711	phylum	Chordata
C26T3:1:1101:15332:6227	Hypentelium	152	genus	98	336		Hypentelium	61315	61315	genus	Hypentelium	7968	family	Catostomidae	7952	order	Cypriniformes	186623	class	Actinopteri	7711	phylum	Chordata
C26T3:1:1101:18152:18594	Hypentelium	152	genus	96	6		Hypentelium	61315	61315	genus	Hypentelium	7968	family	Catostomidae	7952	order	Cypriniformes	186623	class	Actinopteri	7711	phylum	Chordata
C26T3:1:1101:6307:4463	Hypentelium	152	genus	95	6		Hypentelium	61315	61315	genus	Hypentelium	7968	family	Catostomidae	7952	order	Cypriniformes	186623	class	Actinopteri	7711	phylum	Chordata
C26T3:1:1101:9550:10998	Hypentelium	152	genus	95	12		Hypentelium	61315	61315	genus	Hypentelium	7968	family	Catostomidae	7952	order	Cypriniformes	186623	class	Actinopteri	7711	phylum	Chordata
C26T3:1:1102:14252:17776	Hypentelium	152	genus	96	9		Hypentelium	61315	61315	genus	Hypentelium	7968	family	Catostomidae	7952	order	Cypriniformes	186623	class	Actinopteri	7711	phylum	Chordata
C26T3:1:1102:17808:11146	Hypentelium	152	genus	98	2		Hypentelium	61315	61315	genus	Hypentelium	7968	family	Catostomidae	7952	order	Cypriniformes	186623	class	Actinopteri	7711	phylum	Chordata
C26T3:1:1102:22682:16213	Hypentelium	152	genus	96	58		Hypentelium	61315	61315	genus	Hypentelium	7968	family	Catostomidae	7952	order	Cypriniformes	186623	class	Actinopteri	7711	phylum	Chordata
C26T3:1:1103:9328:11262	Hypentelium	152	genus	96	2		Hypentelium	61315	61315	genus	Hypentelium	7968	family	Catostomidae	7952	order	Cypriniformes	186623	class	Actinopteri	7711	phylum	Chordata
C26T3:1:1104:24139:19143	Hypentelium	152	genus	96	69		Hypentelium	61315	61315	genus	Hypentelium	7968	family	Catostomidae	7952	order	Cypriniformes	186623	class	Actinopteri	7711	phylum	Chordata
C26T3:1:1104:9437:7170	Hypentelium	152	genus	98	2		Hypentelium	61315	61315	genus	Hypentelium	7968	family	Catostomidae	7952	order	Cypriniformes	186623	class	Actinopteri	7711	phylum	Chordata
C26T3:1:1107:22656:17396	Hypentelium	152	genus	98	2		Hypentelium	61315	61315	genus	Hypentelium	7968	family	Catostomidae	7952	order	Cypriniformes	186623	class	Actinopteri	7711	phylum	Chordata
C26T3:1:1108:22928:9109	Hypentelium	152	genus	95	2		Hypentelium	61315	61315	genus	Hypentelium	7968	family	Catostomidae	7952	order	Cypriniformes	186623	class	Actinopteri	7711	phylum	Chordata
C26T3:1:1108:25288:22868	Hypentelium	152	genus	98	2		Hypentelium	61315	61315	genus	Hypentelium	7968	family	Catostomidae	7952	order	Cypriniformes	186623	class	Actinopteri	7711	phylum	Chordata
C26T3:1:1109:26334:20828	Hypentelium	152	genus	95	2		Hypentelium	61315	61315	genus	Hypentelium	7968	family	Catostomidae	7952	order	Cypriniformes	186623	class	Actinopteri	7711	phylum	Chordata
C26T3:1:1111:14052:13584	Hypentelium	152	genus	96	2		Hypentelium	61315	61315	genus	Hypentelium	7968	family	Catostomidae	7952	order	Cypriniformes	186623	class	Actinopteri	7711	phylum	Chordata
C26T3:1:1111:23127:7971	Hypentelium	152	genus	96	22		Hypentelium	61315	61315	genus	Hypentelium	7968	family	Catostomidae	7952	order	Cypriniformes	186623	class	Actinopteri	7711	phylum	Chordata
C26T3:1:1112:7926:15818	Hypentelium	152	genus	96	6		Hypentelium	61315	61315	genus	Hypentelium	7968	family	Catostomidae	7952	order	Cypriniformes	186623	class	Actinopteri	7711	phylum	Chordata
C26T3:1:1116:29490:12935	Hypentelium	152	genus	98	3		Hypentelium	61315	61315	genus	Hypentelium	7968	family	Catostomidae	7952	order	Cypriniformes	186623	class	Actinopteri	7711	phylum	Chordata
C26T3:1:1118:19067:4522	Hypentelium	152	genus	96	5		Hypentelium	61315	61315	genus	Hypentelium	7968	family	Catostomidae	7952	order	Cypriniformes	186623	class	Actinopteri	7711	phylum	Chordata
C26T3:1:1118:25060:9522	Hypentelium	152	genus	98	11		Hypentelium	61315	61315	genus	Hypentelium	7968	family	Catostomidae	7952	order	Cypriniformes	186623	class	Actinopteri	7711	phylum	Chordata
C26T3:1:1119:24055:18286	Hypentelium	152	genus	96	2		Hypentelium	61315	61315	genus	Hypentelium	7968	family	Catostomidae	7952	order	Cypriniformes	186623	class	Actinopteri	7711	phylum	Chordata
C26T3:1:1119:27979:19677	Hypentelium	152	genus	95	2		Hypentelium	61315	61315	genus	Hypentelium	7968	family	Catostomidae	7952	order	Cypriniformes	186623	class	Actinopteri	7711	phylum	Chordata
C26T3:1:2101:23181:21982	Hypentelium	152	genus	96	2		Hypentelium	61315	61315	genus	Hypentelium	7968	family	Catostomidae	7952	order	Cypriniformes	186623	class	Actinopteri	7711	phylum	Chordata
C26T3:1:2101:9745:5020	Hypentelium	152	genus	96	2		Hypentelium	61315	61315	genus	Hypentelium	7968	family	Catostomidae	7952	order	Cypriniformes	186623	class	Actinopteri	7711	phylum	Chordata
C26T3:1:2102:18216:2813	Hypentelium	152	genus	96	2		Hypentelium	61315	61315	genus	Hypentelium	7968	family	Catostomidae	7952	order	Cypriniformes	186623	class	Actinopteri	7711	phylum	Chordata
C26T3:1:2102:22574:24681	Hypentelium	152	genus	98	4		Hypentelium	61315	61315	genus	Hypentelium	7968	family	Catostomidae	7952	order	Cypriniformes	186623	class	Actinopteri	7711	phylum	Chordata
C26T3:1:2103:3963:18455	Hypentelium	152	genus	96	2		Hypentelium	61315	61315	genus	Hypentelium	7968	family	Catostomidae	7952	order	Cypriniformes	186623	class	Actinopteri	7711	phylum	Chordata
C26T3:1:2103:4319:19837	Hypentelium	152	genus	98	2		Hypentelium	61315	61315	genus	Hypentelium	7968	family	Catostomidae	7952	order	Cypriniformes	186623	class	Actinopteri	7711	phylum	Chordata
C26T3:1:2104:12247:8194	Hypentelium	152	genus	99	2		Hypentelium	61315	61315	genus	Hypentelium	7968	family	Catostomidae	7952	order	Cypriniformes	186623	class	Actinopteri	7711	phylum	Chordata
C26T3:1:2109:19510:20685	Hypentelium	152	genus	96	2		Hypentelium	61315	61315	genus	Hypentelium	7968	family	Catostomidae	7952	order	Cypriniformes	186623	class	Actinopteri	7711	phylum	Chordata
C26T3:1:2111:12828:2537	Hypentelium	152	genus	96	2		Hypentelium	61315	61315	genus	Hypentelium	7968	family	Catostomidae	7952	order	Cypriniformes	186623	class	Actinopteri	7711	phylum	Chordata
C26T3:1:2111:27713:9813	Hypentelium	152	genus	98	2		Hypentelium	61315	61315	genus	Hypentelium	7968	family	Catostomidae	7952	order	Cypriniformes	186623	class	Actinopteri	7711	phylum	Chordata
C26T3:1:2112:8804:17400	Hypentelium	152	genus	95	2		Hypentelium	61315	61315	genus	Hypentelium	7968	family	Catostomidae	7952	order	Cypriniformes	186623	class	Actinopteri	7711	phylum	Chordata
C26T3:1:2113:11863:15669	Hypentelium	152	genus	98	2		Hypentelium	61315	61315	genus	Hypentelium	7968	family	Catostomidae	7952	order	Cypriniformes	186623	class	Actinopteri	7711	phylum	Chordata
C26T3:1:1102:14731:12354	Hypentelium	150	genus	98	23		Hypentelium	61315	61315	genus	Hypentelium	7968	family	Catostomidae	7952	order	Cypriniformes	186623	class	Actinopteri	7711	phylum	Chordata
C26T3:1:1102:17501:9564	Hypentelium	150	genus	96	3		Hypentelium	61315	61315	genus	Hypentelium	7968	family	Catostomidae	7952	order	Cypriniformes	186623	class	Actinopteri	7711	phylum	Chordata
C26T3:1:1102:23086:3259	Hypentelium	150	genus	96	2		Hypentelium	61315	61315	genus	Hypentelium	7968	family	Catostomidae	7952	order	Cypriniformes	186623	class	Actinopteri	7711	phylum	Chordata
C26T3:1:1103:10059:13613	Hypentelium	150	genus	98	3		Hypentelium	61315	61315	genus	Hypentelium	7968	family	Catostomidae	7952	order	Cypriniformes	186623	class	Actinopteri	7711	phylum	Chordata
C26T3:1:1103:22017:3458	Hypentelium	150	genus	98	18		Hypentelium	61315	61315	genus	Hypentelium	7968	family	Catostomidae	7952	order	Cypriniformes	186623	class	Actinopteri	7711	phylum	Chordata
C26T3:1:1103:6620:18962	Hypentelium	150	genus	98	7		Hypentelium	61315	61315	genus	Hypentelium	7968	family	Catostomidae	7952	order	Cypriniformes	186623	class	Actinopteri	7711	phylum	Chordata
C26T3:1:1105:3175:11869	Hypentelium	150	genus	98	4		Hypentelium	61315	61315	genus	Hypentelium	7968	family	Catostomidae	7952	order	Cypriniformes	186623	class	Actinopteri	7711	phylum	Chordata
C26T3:1:1106:23569:9973	Hypentelium	150	genus	96	2		Hypentelium	61315	61315	genus	Hypentelium	7968	family	Catostomidae	7952	order	Cypriniformes	186623	class	Actinopteri	7711	phylum	Chordata
C26T3:1:1107:10389:4092	Hypentelium	150	genus	98	5		Hypentelium	61315	61315	genus	Hypentelium	7968	family	Catostomidae	7952	order	Cypriniformes	186623	class	Actinopteri	7711	phylum	Chordata
C26T3:1:1107:20187:2082	Hypentelium	150	genus	98	606		Hypentelium	61315	61315	genus	Hypentelium	7968	family	Catostomidae	7952	order	Cypriniformes	186623	class	Actinopteri	7711	phylum	Chordata
C26T3:1:1108:11619:15856	Hypentelium	150	genus	98	3		Hypentelium	61315	61315	genus	Hypentelium	7968	family	Catostomidae	7952	order	Cypriniformes	186623	class	Actinopteri	7711	phylum	Chordata
C26T3:1:1110:10024:11070	Hypentelium	150	genus	95	2		Hypentelium	61315	61315	genus	Hypentelium	7968	family	Catostomidae	7952	order	Cypriniformes	186623	class	Actinopteri	7711	phylum	Chordata
C26T3:1:1110:18838:2192	Hypentelium	150	genus	96	3		Hypentelium	61315	61315	genus	Hypentelium	7968	family	Catostomidae	7952	order	Cypriniformes	186623	class	Actinopteri	7711	phylum	Chordata
C26T3:1:1114:19256:21743	Hypentelium	150	genus	96	189		Hypentelium	61315	61315	genus	Hypentelium	7968	family	Catostomidae	7952	order	Cypriniformes	186623	class	Actinopteri	7711	phylum	Chordata
C26T3:1:1114:22267:19315	Hypentelium	150	genus	96	3		Hypentelium	61315	61315	genus	Hypentelium	7968	family	Catostomidae	7952	order	Cypriniformes	186623	class	Actinopteri	7711	phylum	Chordata
C26T3:1:2102:12224:22698	Hypentelium	150	genus	98	2		Hypentelium	61315	61315	genus	Hypentelium	7968	family	Catostomidae	7952	order	Cypriniformes	186623	class	Actinopteri	7711	phylum	Chordata
C26T3:1:1117:25157:21915	Ictalurus	182	genus	95.3043	2		Ictalurus	7997	7997	genus	Ictalurus	7996	family	Ictaluridae	7995	order	Siluriformes	186623	class	Actinopteri	7711	phylum	Chordata
C26T3:1:1101:24796:5546	Ictalurus	180	genus	98.7895	9		Ictalurus	7997	7997	genus	Ictalurus	7996	family	Ictaluridae	7995	order	Siluriformes	186623	class	Actinopteri	7711	phylum	Chordata
C26T3:1:1102:5713:8644	Ictalurus	180	genus	95.0625	8		Ictalurus	7997	7997	genus	Ictalurus	7996	family	Ictaluridae	7995	order	Siluriformes	186623	class	Actinopteri	7711	phylum	Chordata
C26T3:1:1104:25284:13285	Ictalurus	180	genus	98.7895	2		Ictalurus	7997	7997	genus	Ictalurus	7996	family	Ictaluridae	7995	order	Siluriformes	186623	class	Actinopteri	7711	phylum	Chordata
C26T3:1:1101:20459:23895	Ictalurus	178	genus	98.7895	9		Ictalurus	7997	7997	genus	Ictalurus	7996	family	Ictaluridae	7995	order	Siluriformes	186623	class	Actinopteri	7711	phylum	Chordata
C26T3:1:1101:20621:2185	Ictalurus	171	genus	98.8421	13		Ictalurus	7997	7997	genus	Ictalurus	7996	family	Ictaluridae	7995	order	Siluriformes	186623	class	Actinopteri	7711	phylum	Chordata
C26T3:1:1116:26146:16961	Ictalurus	171	genus	99.8421	2		Ictalurus	7997	7997	genus	Ictalurus	7996	family	Ictaluridae	7995	order	Siluriformes	186623	class	Actinopteri	7711	phylum	Chordata
C26T3:1:1103:3929:7484	Ictalurus	165	genus	97.8421	2		Ictalurus	7997	7997	genus	Ictalurus	7996	family	Ictaluridae	7995	order	Siluriformes	186623	class	Actinopteri	7711	phylum	Chordata
C26T3:1:1101:21480:10359	Ictalurus	161	genus	99.8421	16		Ictalurus	7997	7997	genus	Ictalurus	7996	family	Ictaluridae	7995	order	Siluriformes	186623	class	Actinopteri	7711	phylum	Chordata
C26T3:1:1107:16052:24983	Ictalurus	161	genus	95.8421	2		Ictalurus	7997	7997	genus	Ictalurus	7996	family	Ictaluridae	7995	order	Siluriformes	186623	class	Actinopteri	7711	phylum	Chordata
C26T3:1:1106:5879:20725	Ictalurus	159	genus	96.8421	4		Ictalurus	7997	7997	genus	Ictalurus	7996	family	Ictaluridae	7995	order	Siluriformes	186623	class	Actinopteri	7711	phylum	Chordata
C26T3:1:1111:6436:15965	Ictalurus	159	genus	96.8421	3		Ictalurus	7997	7997	genus	Ictalurus	7996	family	Ictaluridae	7995	order	Siluriformes	186623	class	Actinopteri	7711	phylum	Chordata
C26T3:1:1114:10775:6169	Ictalurus	159	genus	96.8421	4		Ictalurus	7997	7997	genus	Ictalurus	7996	family	Ictaluridae	7995	order	Siluriformes	186623	class	Actinopteri	7711	phylum	Chordata
C26T3:1:1101:10702:1431	Ictalurus	158	genus	99.8421	3		Ictalurus	7997	7997	genus	Ictalurus	7996	family	Ictaluridae	7995	order	Siluriformes	186623	class	Actinopteri	7711	phylum	Chordata
C26T3:1:1101:10856:20178	Ictalurus	158	genus	99.8421	9		Ictalurus	7997	7997	genus	Ictalurus	7996	family	Ictaluridae	7995	order	Siluriformes	186623	class	Actinopteri	7711	phylum	Chordata
C26T3:1:1101:15542:19952	Ictalurus	158	genus	95.3043	98		Ictalurus	7997	7997	genus	Ictalurus	7996	family	Ictaluridae	7995	order	Siluriformes	186623	class	Actinopteri	7711	phylum	Chordata
C26T3:1:1101:6133:14254	Ictalurus	158	genus	99.8421	73		Ictalurus	7997	7997	genus	Ictalurus	7996	family	Ictaluridae	7995	order	Siluriformes	186623	class	Actinopteri	7711	phylum	Chordata
C26T3:1:1104:10417:8961	Ictalurus	158	genus	95.0588	2		Ictalurus	7997	7997	genus	Ictalurus	7996	family	Ictaluridae	7995	order	Siluriformes	186623	class	Actinopteri	7711	phylum	Chordata
C26T3:1:1107:28646:15941	Ictalurus	158	genus	95.0588	2		Ictalurus	7997	7997	genus	Ictalurus	7996	family	Ictaluridae	7995	order	Siluriformes	186623	class	Actinopteri	7711	phylum	Chordata
C26T3:1:1110:16617:9156	Ictalurus	158	genus	99.8421	3		Ictalurus	7997	7997	genus	Ictalurus	7996	family	Ictaluridae	7995	order	Siluriformes	186623	class	Actinopteri	7711	phylum	Chordata
C26T3:1:1111:7725:3771	Ictalurus	158	genus	95.8421	2		Ictalurus	7997	7997	genus	Ictalurus	7996	family	Ictaluridae	7995	order	Siluriformes	186623	class	Actinopteri	7711	phylum	Chordata
C26T3:1:1118:9545:20859	Ictalurus	158	genus	99.8421	2		Ictalurus	7997	7997	genus	Ictalurus	7996	family	Ictaluridae	7995	order	Siluriformes	186623	class	Actinopteri	7711	phylum	Chordata
C26T3:1:2105:6453:18922	Ictalurus	158	genus	95.8889	2		Ictalurus	7997	7997	genus	Ictalurus	7996	family	Ictaluridae	7995	order	Siluriformes	186623	class	Actinopteri	7711	phylum	Chordata
C26T3:1:2109:22527:20235	Ictalurus	158	genus	99.8421	4		Ictalurus	7997	7997	genus	Ictalurus	7996	family	Ictaluridae	7995	order	Siluriformes	186623	class	Actinopteri	7711	phylum	Chordata
C26T3:1:1101:10987:2501	Ictalurus	156	genus	99.8421	605		Ictalurus	7997	7997	genus	Ictalurus	7996	family	Ictaluridae	7995	order	Siluriformes	186623	class	Actinopteri	7711	phylum	Chordata
C26T3:1:1101:11945:9368	Ictalurus	154	genus	99.8421	8		Ictalurus	7997	7997	genus	Ictalurus	7996	family	Ictaluridae	7995	order	Siluriformes	186623	class	Actinopteri	7711	phylum	Chordata
C26T3:1:1112:17122:9535	Ictalurus	154	genus	99.8421	2		Ictalurus	7997	7997	genus	Ictalurus	7996	family	Ictaluridae	7995	order	Siluriformes	186623	class	Actinopteri	7711	phylum	Chordata
C26T3:1:2105:7285:14110	Ictalurus	154	genus	95.8421	2		Ictalurus	7997	7997	genus	Ictalurus	7996	family	Ictaluridae	7995	order	Siluriformes	186623	class	Actinopteri	7711	phylum	Chordata
C26T3:1:1101:10137:16276	Ictalurus	152	genus	98.8421	98		Ictalurus	7997	7997	genus	Ictalurus	7996	family	Ictaluridae	7995	order	Siluriformes	186623	class	Actinopteri	7711	phylum	Chordata
C26T3:1:1101:15383:21267	Ictalurus	152	genus	98.8421	2		Ictalurus	7997	7997	genus	Ictalurus	7996	family	Ictaluridae	7995	order	Siluriformes	186623	class	Actinopteri	7711	phylum	Chordata
C26T3:1:1101:6181:15766	Ictalurus	152	genus	98.8421	2		Ictalurus	7997	7997	genus	Ictalurus	7996	family	Ictaluridae	7995	order	Siluriformes	186623	class	Actinopteri	7711	phylum	Chordata
C26T3:1:1102:10601:23210	Ictalurus	152	genus	98.8421	27		Ictalurus	7997	7997	genus	Ictalurus	7996	family	Ictaluridae	7995	order	Siluriformes	186623	class	Actinopteri	7711	phylum	Chordata
C26T3:1:1103:23715:22577	Ictalurus	152	genus	98.8421	2		Ictalurus	7997	7997	genus	Ictalurus	7996	family	Ictaluridae	7995	order	Siluriformes	186623	class	Actinopteri	7711	phylum	Chordata
C26T3:1:1104:3015:10121	Ictalurus	152	genus	98.8421	5		Ictalurus	7997	7997	genus	Ictalurus	7996	family	Ictaluridae	7995	order	Siluriformes	186623	class	Actinopteri	7711	phylum	Chordata
C26T3:1:1107:19072:17756	Ictalurus	152	genus	98.8421	4		Ictalurus	7997	7997	genus	Ictalurus	7996	family	Ictaluridae	7995	order	Siluriformes	186623	class	Actinopteri	7711	phylum	Chordata
C26T3:1:1108:14215:13899	Ictalurus	152	genus	98.8421	8		Ictalurus	7997	7997	genus	Ictalurus	7996	family	Ictaluridae	7995	order	Siluriformes	186623	class	Actinopteri	7711	phylum	Chordata
C26T3:1:1108:14940:16543	Ictalurus	152	genus	98.8421	2		Ictalurus	7997	7997	genus	Ictalurus	7996	family	Ictaluridae	7995	order	Siluriformes	186623	class	Actinopteri	7711	phylum	Chordata
C26T3:1:1108:19872:6537	Ictalurus	152	genus	98.8421	5		Ictalurus	7997	7997	genus	Ictalurus	7996	family	Ictaluridae	7995	order	Siluriformes	186623	class	Actinopteri	7711	phylum	Chordata
C26T3:1:1110:9675:3575	Ictalurus	152	genus	98.8421	2		Ictalurus	7997	7997	genus	Ictalurus	7996	family	Ictaluridae	7995	order	Siluriformes	186623	class	Actinopteri	7711	phylum	Chordata
C26T3:1:1111:25698:4077	Ictalurus	152	genus	98.8421	4		Ictalurus	7997	7997	genus	Ictalurus	7996	family	Ictaluridae	7995	order	Siluriformes	186623	class	Actinopteri	7711	phylum	Chordata
C26T3:1:1113:20565:17055	Ictalurus	152	genus	98.8421	2		Ictalurus	7997	7997	genus	Ictalurus	7996	family	Ictaluridae	7995	order	Siluriformes	186623	class	Actinopteri	7711	phylum	Chordata
C26T3:1:1119:18371:16205	Ictalurus	152	genus	98.8889	5		Ictalurus	7997	7997	genus	Ictalurus	7996	family	Ictaluridae	7995	order	Siluriformes	186623	class	Actinopteri	7711	phylum	Chordata
C26T3:1:1119:5151:12312	Ictalurus	152	genus	98.8421	3		Ictalurus	7997	7997	genus	Ictalurus	7996	family	Ictaluridae	7995	order	Siluriformes	186623	class	Actinopteri	7711	phylum	Chordata
C26T3:1:1119:6588:7618	Ictalurus	152	genus	98.8421	2		Ictalurus	7997	7997	genus	Ictalurus	7996	family	Ictaluridae	7995	order	Siluriformes	186623	class	Actinopteri	7711	phylum	Chordata
C26T3:1:2105:5839:11447	Ictalurus	152	genus	98.8421	2		Ictalurus	7997	7997	genus	Ictalurus	7996	family	Ictaluridae	7995	order	Siluriformes	186623	class	Actinopteri	7711	phylum	Chordata
C26T3:1:2106:25352:8451	Ictalurus	152	genus	98.8421	2		Ictalurus	7997	7997	genus	Ictalurus	7996	family	Ictaluridae	7995	order	Siluriformes	186623	class	Actinopteri	7711	phylum	Chordata
C26T3:1:2107:23869:17195	Ictalurus	152	genus	98.8421	2		Ictalurus	7997	7997	genus	Ictalurus	7996	family	Ictaluridae	7995	order	Siluriformes	186623	class	Actinopteri	7711	phylum	Chordata
C26T3:1:2111:11874:7653	Ictalurus	152	genus	98.8421	2		Ictalurus	7997	7997	genus	Ictalurus	7996	family	Ictaluridae	7995	order	Siluriformes	186623	class	Actinopteri	7711	phylum	Chordata
[truncated: 5,439 more rows]
