# Supplementary material for: Composition and distribution of fish environmental DNA in an Adirondack watershed
Source: PeerJ. 2021 Feb 26;9:e10539. doi: 10.7717/peerj.10539 (PMC7919543; doi:10.7717/peerj.10539)
Supplement: Supplemental Information 24 — The output table generated by PAST3, including pairwise post hoc comparisons. [file peerj-09-10539-s024.xlsx]

## Sheet: Sheet1
Supplemental File S7. Analysis of variance table for mean eDNA concentration by month.
	Sum of squares	df	Mean square	F	p
Between groups	190.58	2	95.2901	6.655	0.002277
Within groups	988.051	69	14.3196
Total	1178.63	71
Tukey's pairwise comparison: Tukey's Q below the diagonal, p(same) above the diagonal. Significant comparisons are highlighted.
	August	September	October
August		0.3987	0.04007
September	1.842		0.001811
October	3.517	5.064
